# Supplementary material for: TULIP2: An Improved Method for the Identification of Ubiquitin E3-Specific Targets
Source: Front Chem. 2019 Nov 26;7:802. doi: 10.3389/fchem.2019.00802 (PMC6901917; doi:10.3389/fchem.2019.00802)
Supplement: Supplementary Dataset 1 — Values from the mass spectrometry analysis comparing RNF4-TULIP and RNF4-TULIP2. [file Data_Sheet_1.xlsx]

## Sheet: proteinGroups
GENE			TULIP2- TULIP (log2)			Sequence coverage (%)		Intensity		iBAQ		LFQ intensity		Spectral Counts (MS/MS)		Miscellaneous
Fasta headers	Protein names	Gene names	Intensity	iBAQ	LFQ intensity	TULIP	TULIP2	TULIP	TULIP2	TULIP	TULIP2	TULIP	TULIP2	TULIP	TULIP2	Number of proteins	Peptides	Razor + unique peptides	Unique peptides	Peptides TULIP	Peptides TULIP2	Razor + unique peptides TULIP	Razor + unique peptides TULIP2	Unique peptides TULIP	Unique peptides TULIP2	Sequence coverage [%]	Unique + razor sequence coverage [%]	Unique sequence coverage [%]	Mol. weight [kDa]	Sequence length	Sequence lengths	Score	Only identified by site	Reverse	Potential contaminant	id	Peptide IDs	Peptide is razor	Mod. peptide IDs	Evidence IDs	MS/MS IDs	Best MS/MS	GlyGly (K) site IDs	Oxidation (M) site IDs	GlyGly (K) site positions	Oxidation (M) site positions	Protein IDs	Majority protein IDs
sp|P0CG48|UBC_HUMAN Polyubiquitin-C OS=Homo sapiens OX=9606 GN=UBC PE=1 SV=3;tr|F5GYU3|F5GYU3_HUMAN Polyubiquitin-C (Fragment) OS=Homo sapiens OX=9606 GN=UBC PE=1 SV=1;tr|Q96C32|Q96C32_HUMAN Polyubiquitin-C OS=Homo sapiens OX=9606 GN=UBC PE=1 SV=1;tr|Q5PY6	Polyubiquitin-C;Ubiquitin;Polyubiquitin-B;Ubiquitin;Ubiquitin-60S ribosomal protein L40;Ubiquitin;60S ribosomal protein L40;Ubiquitin-40S ribosomal protein S27a;Ubiquitin;40S ribosomal protein S27a	UBC;UBB;RPS27A;UBA52	2.18561	2.18564	1.78382	97.2	99.6	18041000000	82072000000	410020000	1865300000	22615000000	77872000000	30	115	24	22	22	22	17	21	17	21	17	21	99.6	99.6	99.6	77.038	685	685;134;305;229;206;169;160;155;153;149;136;122;93;229;106;128;156;95;63;138;114;156;61;43	323.31				384	847;2857;3473;4866;6732;8573;8574;8575;10616;10617;12074;12075;12076;15005;15006;15007;15213;15214;15215;15247;15248;15249	True;True;True;True;True;True;True;True;True;True;True;True;True;True;True;True;True;True;True;True;True;True	877;878;2971;3626;5070;7010;7011;8944;8945;8946;8947;8948;11167;11168;11169;11170;12725;12726;12727;12728;15814;15815;15816;15817;16032;16033;16034;16035;16068;16069;16070;16071;16072	2462;2463;2464;2465;2466;2467;2468;2469;2470;2471;2472;2473;2474;2475;2476;2477;2478;2479;2480;2481;2482;2483;2484;2485;2486;2487;2488;2489;2490;2491;2492;2493;2494;2495;2496;2497;2498;2499;2500;2501;2502;2503;2504;2505;2506;2507;2508;2509;2510;2511;2512;2513;2514;2515;2516;2517;2518;2519;2520;2521;2522;2523;2524;2525;2526;2527;2528;2529;2530;2531;2532;2533;8342;8343;8344;8345;8346;8347;8348;8349…	2579;2580;2581;2582;2583;2584;2585;2586;2587;2588;2589;2590;2591;2592;2593;2594;2595;2596;2597;2598;2599;2600;2601;2602;2603;2604;2605;2606;2607;2608;2609;2610;2611;2612;2613;2614;2615;2616;2617;2618;2619;2620;2621;2622;2623;2624;2625;2626;2627;2628;2629;2630;2631;2632;2633;2634;2635;2636;2637;2638;2639;2640;2641;2642;2643;2644;2645;2646;2647;2648;2649;2650;2651;2652;2653;2654;2655;2656;2657;2658…	2600;8935;11158;15600;21802;28223;28232;28249;35101;35111;40152;40169;40182;50225;50244;50253;50952;50992;51002;51145;51162;51164	56;57;58;59;60;61;62	148	6;11;27;29;33;48;63	1	P0CG48;F5GYU3;Q96C32;Q5PY61;J3QKN0;F5GXK7;F5H747;F5H388;B4DV12;F5H265;F5H2Z3;F5H6Q2;J3QS39;P0CG47;J3QTR3;P62987;P62979;Q49A90;M0R1V7;M0R2S1;M0R1M6;A0A2R8Y422;F5GZ39;J3QSA3	P0CG48;F5GYU3;Q96C32;Q5PY61;J3QKN0;F5GXK7;F5H747;F5H388;B4DV12;F5H265;F5H2Z3;F5H6Q2;J3QS39;P0CG47;J3QTR3;P62987;P62979;Q49A90;M0R1V7;M0R2S1;M0R1M6;A0A2R8Y422;F5GZ39;J3QSA3
sp|Q7Z417|NUFP2_HUMAN Nuclear fragile X mental retardation-interacting protein 2 OS=Homo sapiens OX=9606 GN=NUFIP2 PE=1 SV=1	Nuclear fragile X mental retardation-interacting protein 2	NUFIP2	-0.925257	-0.925244	-1.62455	62.7	63.5	190510000000	100320000000	7327500000	3858600000	226760000000	73541000000	209	377	1	59	59	54	52	43	52	43	47	39	67.1	67.1	61.9	76.12	695	695	323.31				1953	92;299;300;1338;1784;2553;2740;2997;3261;3262;4562;4563;4649;5040;5050;5051;5093;5245;5246;5645;5855;5856;6375;6627;6628;7268;7433;7434;7696;7720;9706;10887;11270;11926;11927;11928;11929;12650;12881;13101;13352;13430;13431;14162;14487;14488;14891;14892;14893;14991;15069;15508;15936;15937;16358;16531;16532;16654;17501	True;True;True;True;True;True;True;True;True;True;True;True;True;True;True;True;True;True;True;True;True;True;True;True;True;True;True;True;True;True;True;True;True;True;True;True;True;True;True;True;True;True;True;True;True;True;True;True;True;True;True;True;True;True;True;True;True;True;True	94;316;317;1396;1855;2655;2849;3119;3395;3396;3397;4754;4755;4848;5246;5256;5257;5258;5259;5302;5461;5462;5877;6100;6101;6639;6640;6902;6903;6904;7577;7752;7753;8027;8051;10126;10127;11484;11885;12569;12570;12571;12572;13336;13337;13581;13816;13817;14088;14089;14170;14171;14944;14945;15278;15279;15280;15700;15701;15702;15800;15879;16345;16796;16797;17235;17411;17412;17537;17538;18414	255;256;257;258;259;955;956;957;958;959;960;961;962;963;964;965;966;967;968;969;970;971;972;973;3961;3962;5263;5264;5265;5266;5267;5268;7506;7507;7508;7509;7510;7511;7512;7513;7514;7515;8024;8025;8026;8027;8028;8029;8030;8031;8032;8033;8034;8035;8842;8843;8844;8845;9723;9724;9725;9726;9727;9728;9729;9730;9731;9732;9733;9734;9735;9736;9737;9738;9739;9740;9741;9742;9743;9744;9745;13634;13635;13636;…	262;263;264;265;266;1029;1030;1031;1032;1033;1034;1035;1036;1037;1038;1039;1040;1041;1042;1043;1044;1045;1046;1047;1048;1049;1050;1051;4271;4272;5631;5632;5633;5634;5635;5636;7991;7992;7993;7994;7995;7996;7997;7998;7999;8000;8001;8002;8003;8545;8546;8547;8548;8549;8550;8551;8552;8553;8554;8555;8556;8557;8558;8559;8560;8561;8562;8563;8564;8565;8566;8567;8568;9444;9445;9446;9447;10382;10383;10384;1…	266;1037;1048;4272;5632;7992;8567;9445;10405;10409;14532;14542;14897;16190;16236;16279;16403;16883;16888;18155;18914;18918;20564;21378;21381;23764;24266;24267;25379;25491;31936;36177;37475;39640;39645;39655;39660;42002;42792;43559;44387;44649;44651;47106;48210;48213;49816;49821;49827;50167;50409;52047;53672;53679;55002;55536;55540;55945;58754		766;767;768;769;770;771;772		203;245;299;403;532;669;690	Q7Z417	Q7Z417
sp|P25490|TYY1_HUMAN Transcriptional repressor protein YY1 OS=Homo sapiens OX=9606 GN=YY1 PE=1 SV=2;tr|H0YJV7|H0YJV7_HUMAN Transcriptional repressor protein YY1 (Fragment) OS=Homo sapiens OX=9606 GN=YY1 PE=1 SV=1	Transcriptional repressor protein YY1	YY1	-1.16979	-1.16975	-0.980124	55.6	47.8	133840000000	59490000000	7872700000	3499400000	140280000000	71113000000	311	454	4	36	36	29	31	29	31	29	24	25	58.9	58.9	51.9	44.712	414	414;190;123;310	323.31				1310	322;593;594;595;2048;2049;2778;3751;3752;4341;5809;5810;6254;6389;7212;7213;7267;7385;7523;7706;7707;7708;9328;10331;10332;12047;12592;12634;13454;14507;14508;14509;15119;15120;16254;16255	True;True;True;True;True;True;True;True;True;True;True;True;True;True;True;True;True;True;True;True;True;True;True;True;True;True;True;True;True;True;True;True;True;True;True;True	339;618;619;620;2128;2129;2130;2131;2888;3915;3916;4526;6051;6052;6513;6654;7515;7516;7517;7576;7701;7850;8037;8038;8039;9738;10815;10816;12696;13277;13320;14194;15299;15300;15301;15934;15935;15936;15937;17126;17127	1019;1020;1021;1022;1757;1758;1759;1760;1761;1762;1763;1764;1765;6027;6028;6029;6030;6031;6032;6033;6034;6035;6036;6037;6038;6039;6040;6041;6042;6043;6044;6045;6046;6047;6048;6049;8133;8134;8135;11251;11252;11253;11254;11255;11256;11257;11258;11259;11260;11261;11262;11263;11264;13031;13032;13033;13034;13035;13036;13037;13038;13039;13040;13041;13042;13043;13044;13045;13046;17580;17581;17582;17583;…	1097;1098;1099;1100;1843;1844;1845;1846;1847;1848;1849;1850;1851;6429;6430;6431;6432;6433;6434;6435;6436;6437;6438;6439;6440;6441;6442;6443;6444;6445;6446;6447;6448;6449;6450;6451;6452;6453;6454;6455;6456;8678;8679;8680;12014;12015;12016;12017;12018;12019;12020;12021;12022;12023;12024;12025;12026;12027;12028;12029;13892;13893;13894;13895;13896;13897;13898;13899;13900;13901;13902;13903;13904;13905…	1098;1843;1847;1851;6441;6454;8678;12015;12028;13915;18786;18789;20102;20601;23587;23591;23761;24103;24614;25429;25439;25452;30716;33939;33944;40056;41788;41956;44745;48323;48437;48656;50631;50659;54642;54645	117;118;163;164	476;477	332;351;362;392	223;255	P25490;H0YJV7;H0YJU4;Q96MM3	P25490;H0YJV7
sp|Q9NRA2-2|S17A5_HUMAN Isoform 2 of Sialin OS=Homo sapiens OX=9606 GN=SLC17A5;sp|Q9NRA2|S17A5_HUMAN Sialin OS=Homo sapiens OX=9606 GN=SLC17A5 PE=1 SV=2	Sialin	SLC17A5	3.9785	#VALUE!	#NUM!	0	0	4177100000	65845000000	NaN	NaN	0	63573000000	5	18	2	1	1	1	1	1	1	1	1	1	0	0	0	30.666	277	277;495	1.9235		+		2678	1212	TRUE	1265	3591;3592;3593;3594;3595;3596	3867;3868;3869;3870;3871;3872;3873;3874;3875;3876;3877;3878;3879;3880;3881;3882;3883;3884;3885;3886;3887;3888;3889	3879					REV__Q9NRA2-2;REV__Q9NRA2	REV__Q9NRA2-2;REV__Q9NRA2
			0.217889	0.217875	0.329917	25.1	25.1	46390000000	53953000000	4217300000	4904800000	48011000000	60347000000	13	67	1	6	6	6	4	6	4	6	4	6	25.1	25.1	25.1	24.409	231	231	323.31			+	468	6370;6371;8357;8358;9713;15905	True;True;True;True;True;True	6633;6634;6635;8713;8714;8715;10134;16765	19199;19200;19201;19202;19203;19204;19205;19206;19207;19208;19209;19210;19211;19212;19213;19214;19215;19216;19217;19218;19219;19220;19221;25448;25449;25450;25451;25452;25453;25454;25455;25456;25457;25458;25459;25460;25461;25462;25463;25464;29641;29642;29643;29644;29645;29646;49755;49756;49757;49758;49759;49760	20514;20515;20516;20517;20518;20519;20520;20521;20522;20523;20524;20525;20526;20527;20528;20529;20530;20531;20532;20533;20534;20535;20536;20537;20538;20539;20540;20541;20542;20543;27497;27498;27499;27500;27501;27502;27503;27504;27505;27506;27507;27508;27509;27510;27511;27512;27513;27514;27515;27516;27517;27518;27519;31962;31963;31964;31965;31966;31967;31968;31969;31970;31971;31972;31973;53577;535…	20538;20543;27507;27518;31966;53577		172		94	CON__P00761	CON__P00761
sp|Q15233|NONO_HUMAN Non-POU domain-containing octamer-binding protein OS=Homo sapiens OX=9606 GN=NONO PE=1 SV=4;sp|Q15233-2|NONO_HUMAN Isoform 2 of Non-POU domain-containing octamer-binding protein OS=Homo sapiens OX=9606 GN=NONO;tr|C9JYS8|C9JYS8_HUMAN No	Non-POU domain-containing octamer-binding protein	NONO	-1.75979	-1.75984	-1.76796	76.6	70.3	170930000000	50474000000	8139700000	2403500000	172380000000	50615000000	440	442	9	73	73	71	64	50	64	50	63	48	79.2	79.2	79.2	54.231	471	471;382;247;234;207;124;65;248;393	323.31				1742	133;134;135;622;623;624;625;993;994;995;1742;1743;2112;2113;3045;3046;3366;3389;3700;3747;3934;4604;4747;5011;5012;5013;5471;5655;7640;7641;8157;8158;8238;8322;8323;8324;8325;9929;9930;10241;10242;10243;10367;10639;11237;11739;11740;12083;12084;12288;12289;12290;12312;12313;12684;12742;12743;12840;12841;12842;14118;14119;14120;14770;15085;15086;15087;16021;16022;17285;17286;17287;17288	True;True;True;True;True;True;True;True;True;True;True;True;True;True;True;True;True;True;True;True;True;True;True;True;True;True;True;True;True;True;True;True;True;True;True;True;True;True;True;True;True;True;True;True;True;True;True;True;True;True;True;True;True;True;True;True;True;True;True;True;True;True;True;True;True;True;True;True;True;True;True;True;True	137;138;139;648;649;650;651;1026;1027;1028;1029;1030;1031;1810;1811;2195;2196;3168;3169;3170;3171;3172;3173;3174;3513;3514;3537;3860;3910;3911;4105;4106;4798;4799;4800;4801;4948;5217;5218;5219;5694;5887;5888;5889;7970;7971;8508;8509;8510;8591;8676;8677;8678;8679;8680;8681;10355;10356;10695;10696;10697;10698;10699;10857;10858;10859;10860;11195;11196;11849;12376;12377;12378;12379;12735;12736;12954;…	377;378;379;380;381;382;383;384;385;386;387;388;389;390;391;392;393;394;395;396;397;1843;1844;1845;1846;1847;1848;1849;1850;1851;1852;1853;1854;1855;1856;1857;1858;2928;2929;2930;2931;2932;2933;2934;2935;2936;2937;2938;2939;2940;2941;2942;2943;2944;2945;2946;2947;2948;2949;2950;2951;2952;2953;2954;2955;2956;2957;2958;2959;2960;2961;2962;5151;5152;5153;5154;5155;5156;5157;5158;5159;5160;6220;6221;…	388;389;390;391;392;393;394;395;396;397;398;399;400;401;402;403;404;405;406;407;408;409;410;411;412;1936;1937;1938;1939;1940;1941;1942;1943;1944;1945;1946;1947;1948;1949;1950;1951;3170;3171;3172;3173;3174;3175;3176;3177;3178;3179;3180;3181;3182;3183;3184;3185;3186;3187;3188;3189;3190;3191;3192;3193;3194;3195;3196;3197;3198;3199;3200;3201;3202;3203;3204;3205;5514;5515;5516;5517;5518;5519;5520;5521…	389;396;412;1940;1941;1949;1951;3190;3195;3201;5517;5526;6637;6643;9646;9677;10795;10854;11826;12000;12626;14726;15212;16089;16091;16104;17594;18214;25184;25192;26846;26848;27064;27372;27401;27415;27421;32606;32607;33537;33544;33548;34124;35179;37375;39119;39122;40200;40204;40802;40814;40819;40897;40900;42093;42257;42283;42619;42624;42633;46948;46962;46965;49481;50457;50481;50496;53986;53998;5802…		685;686;687;688;689;690;691;692;693;694;695;696;697;698;699;700;701;702;703		1;90;132;227;269;277;298;300;310;312;326;384;387;389;393;401;419;420;441	Q15233;Q15233-2;C9JYS8;H7C367;C9IZL7;C9J4X2;C9JJ13;X6RDA4;Q8WXF1-2	Q15233;Q15233-2;C9JYS8;H7C367
sp|P46060|RAGP1_HUMAN Ran GTPase-activating protein 1 OS=Homo sapiens OX=9606 GN=RANGAP1 PE=1 SV=1	Ran GTPase-activating protein 1	RANGAP1	7.57489	7.57489	6.63129	26.9	56.9	250110000	47687000000	9263400	1766200000	458860000	45488000000	12	272	5	40	40	40	9	40	9	40	9	40	56.9	56.9	56.9	63.541	587	587;100;133;253;37	323.31				1409	518;742;1413;1832;1833;2508;2509;2941;2942;4639;4640;5834;5835;6458;7388;7864;8132;8162;8439;9279;9280;9281;10174;11462;12436;13596;13735;13736;13737;13738;14139;14144;14268;14269;15445;16292;16317;16318;16931;17122	True;True;True;True;True;True;True;True;True;True;True;True;True;True;True;True;True;True;True;True;True;True;True;True;True;True;True;True;True;True;True;True;True;True;True;True;True;True;True;True	543;769;1472;1473;1906;1907;1908;2609;2610;3061;3062;4837;4838;4839;6079;6080;6726;7704;8199;8483;8514;8799;9686;9687;9688;10612;10613;10614;12087;13110;14340;14489;14490;14491;14492;14493;14920;14926;15055;15056;16280;17166;17167;17193;17194;17828;18023	1563;1564;1565;2160;2161;2162;4172;4173;4174;4175;4176;4177;5411;5412;5413;5414;5415;5416;5417;5418;5419;5420;5421;7375;7376;7377;7378;7379;7380;7381;7382;7383;7384;7385;8648;8649;8650;8651;8652;13915;13916;13917;13918;13919;13920;13921;13922;13923;13924;13925;13926;13927;13928;17649;17650;17651;17652;17653;17654;19509;19510;19511;19512;19513;19514;19515;19516;22443;22444;22445;22446;22447;22448;…	1648;1649;1650;2262;2263;2264;2265;2266;2267;2268;4486;4487;4488;4489;4490;4491;5785;5786;5787;5788;5789;5790;5791;5792;5793;5794;5795;5796;5797;7846;7847;7848;7849;7850;7851;7852;7853;7854;7855;7856;9248;9249;9250;9251;9252;14857;14858;14859;14860;14861;14862;14863;14864;14865;14866;14867;14868;14869;14870;14871;14872;14873;14874;14875;18854;18855;18856;18857;18858;18859;20835;20836;20837;20838;…	1649;2268;4488;5786;5793;7850;7855;9248;9252;14861;14869;18854;18857;20838;24110;25977;26788;26860;27752;30486;30490;30499;33265;38154;41297;45210;45647;45650;45652;45659;47029;47053;47463;47474;51820;54821;54894;54895;56857;57487	176;177;178	529;530;531;532;533;534;535	8;31;452	215;256;317;488;498;540;545	P46060;B0QYT5;B0QYT4;H0Y4Q3;B0QYT6	P46060
tr|B8ZZN6|B8ZZN6_HUMAN Small ubiquitin-related modifier 1 OS=Homo sapiens OX=9606 GN=SUMO1 PE=1 SV=1;sp|P63165|SUMO1_HUMAN Small ubiquitin-related modifier 1 OS=Homo sapiens OX=9606 GN=SUMO1 PE=1 SV=1;tr|B8ZZJ0|B8ZZJ0_HUMAN Small ubiquitin-related modifier	Small ubiquitin-related modifier 1	SUMO1	2.94295	2.94295	2.16479	30.8	41.8	6076600000	46728000000	675180000	5192000000	9083400000	40730000000	6	71	7	12	12	12	8	12	8	12	8	12	41.8	41.8	41.8	16.645	146	146;101;58;77;62;101;76	228.47				415	2839;4092;8763;10733;11733;11953;13085;13086;13087;13088;16290;16291	True;True;True;True;True;True;True;True;True;True;True;True	2950;4267;9147;9148;11305;12370;12601;12602;13794;13795;13796;13797;13798;13799;13800;13801;13802;17163;17164;17165	8281;8282;8283;12298;12299;12300;12301;26747;26748;26749;26750;26751;26752;26753;26754;26755;26756;26757;26758;26759;26760;26761;26762;26763;32976;36299;36300;36301;36302;36303;36920;36921;36922;36923;36924;36925;36926;40412;40413;40414;40415;40416;40417;40418;40419;40420;40421;40422;40423;40424;40425;40426;40427;40428;40429;40430;40431;40432;40433;40434;40435;40436;40437;40438;40439;40440;40441;…	8829;8830;8831;13114;13115;13116;13117;13118;13119;13120;13121;13122;13123;13124;13125;13126;28852;28853;28854;28855;28856;28857;28858;28859;28860;28861;28862;28863;28864;28865;28866;28867;28868;28869;28870;28871;28872;28873;28874;28875;28876;28877;28878;35553;39102;39103;39104;39105;39106;39765;39766;39767;39768;39769;39770;39771;39772;39773;39774;39775;39776;39777;39778;43456;43457;43458;43459;…	8829;13115;28870;35553;39103;39771;43457;43467;43484;43512;54776;54816	66;67;68;69;70	149	7;16;17;25;37	59	B8ZZN6;P63165;B8ZZJ0;B9A032;B8ZZ67;G2XKQ0;P63165-2	B8ZZN6;P63165;B8ZZJ0;B9A032
sp|P22314-2|UBA1_HUMAN Isoform 2 of Ubiquitin-like modifier-activating enzyme 1 OS=Homo sapiens OX=9606 GN=UBA1;sp|P22314|UBA1_HUMAN Ubiquitin-like modifier-activating enzyme 1 OS=Homo sapiens OX=9606 GN=UBA1 PE=1 SV=3	Ubiquitin-like modifier-activating enzyme 1	UBA1	#NUM!	#NUM!	#NUM!	0	52.4	0	41191000000	0	807660000	0	40064000000	0	234	8	45	45	45	0	45	0	45	0	45	52.4	52.4	52.4	113.8	1018	1018;1058;506;270;284;173;195;234	323.31				1295	183;382;383;1066;1067;1573;1731;1732;1733;1919;1920;2301;3392;4853;5117;5253;5686;6281;7106;7448;7608;7884;8001;8064;8705;8747;9508;10012;10793;10895;10945;10965;10982;11044;11895;12122;12214;12215;12255;12261;12262;12728;13436;13846;17462	True;True;True;True;True;True;True;True;True;True;True;True;True;True;True;True;True;True;True;True;True;True;True;True;True;True;True;True;True;True;True;True;True;True;True;True;True;True;True;True;True;True;True;True;True	189;404;405;1103;1104;1636;1799;1800;1801;1997;1998;2392;3540;5056;5326;5469;5921;6540;7393;7767;7768;7937;8219;8344;8408;8409;9088;9131;9926;10441;11380;11492;11542;11562;11579;11646;12538;12777;12871;12872;12873;12917;12923;12924;13417;14176;14606;18375	524;525;526;527;528;1213;1214;1215;1216;1217;1218;1219;1220;1221;3152;3153;3154;3155;3156;3157;3158;3159;3160;3161;3162;3163;4636;4637;4638;4639;4640;4641;4642;5124;5125;5126;5127;5128;5129;5130;5131;5132;5133;5134;5662;5663;5664;5665;5666;5667;6765;10174;10175;10176;10177;10178;14574;14575;14576;14577;14578;15410;15411;15412;15819;15820;15821;15822;15823;15824;15825;17129;18882;18883;18884;18885…	552;553;554;555;556;557;558;559;560;561;562;1293;1294;1295;1296;1297;1298;1299;1300;1301;3405;3406;3407;3408;3409;3410;3411;3412;3413;3414;3415;3416;3417;4971;4972;4973;4974;4975;4976;4977;4978;4979;4980;4981;4982;4983;5485;5486;5487;5488;5489;5490;5491;5492;5493;5494;5495;5496;5497;6050;6051;6052;6053;6054;6055;7191;10859;10860;10861;10862;10863;15559;15560;15561;15562;15563;16474;16475;16476;16…	558;1293;1300;3407;3415;4983;5486;5491;5496;6052;6053;7191;10862;15563;16477;16918;18318;20171;23090;24309;25093;26053;26426;26601;28638;28803;31294;32838;35823;36188;36344;36401;36453;36713;39541;40302;40557;40561;40683;40706;40707;42210;44674;46024;58603	160;161;162	470;471;472	631;766;968	27;370;975	P22314-2;P22314;Q5JRR6;Q5JRR9;Q5JRS0;Q5JRS1;Q5JRS3;Q5JRS2	P22314-2;P22314
sp|Q9Y2X9|ZN281_HUMAN Zinc finger protein 281 OS=Homo sapiens OX=9606 GN=ZNF281 PE=1 SV=1;sp|Q9Y2X9-2|ZN281_HUMAN Isoform 2 of Zinc finger protein 281 OS=Homo sapiens OX=9606 GN=ZNF281	Zinc finger protein 281	ZNF281	-0.0176207	-0.017662	0.151072	58.4	52.5	35257000000	34829000000	1068400000	1055400000	34567000000	38383000000	141	241	2	53	53	53	43	41	43	41	43	41	64	64	64	96.914	895	895;859	323.31				2597	869;1472;2514;2515;3317;4633;4634;6221;6222;7256;7381;7588;7618;9337;10432;11171;11172;11173;11174;11175;11539;11669;11940;11941;12526;12680;12794;12878;13204;13384;13385;13386;13423;13424;13473;13623;13823;13958;13959;14316;14646;14647;14850;14919;15302;15303;15535;15611;15949;15950;16735;16736;17741	True;True;True;True;True;True;True;True;True;True;True;True;True;True;True;True;True;True;True;True;True;True;True;True;True;True;True;True;True;True;True;True;True;True;True;True;True;True;True;True;True;True;True;True;True;True;True;True;True;True;True;True;True	900;1534;1535;2615;2616;3461;4830;4831;4832;6480;6481;7565;7697;7916;7947;9747;10937;11782;11783;11784;11785;11786;12167;12302;12585;12586;12587;12588;13206;13207;13367;13488;13578;13926;14122;14123;14124;14161;14162;14163;14215;14370;14583;14728;14729;15104;15441;15442;15658;15659;15728;16131;16132;16374;16459;16809;16810;16811;17623;17624;17625;18663	2594;4372;4373;4374;4375;4376;4377;4378;4379;7392;7393;7394;7395;7396;7397;9936;9937;9938;9939;9940;9941;13883;13884;13885;13886;13887;13888;13889;13890;13891;13892;13893;13894;13895;13896;13897;13898;13899;13900;13901;18732;18733;18734;18735;18736;18737;18738;22070;22071;22072;22073;22074;22075;22076;22077;22078;22079;22430;22431;23136;23137;23138;23139;23140;23141;23142;23143;23144;23145;23146;…	2824;4697;4698;4699;4700;4701;4702;4703;4704;4705;7863;7864;7865;7866;7867;7868;10604;10605;10606;10607;10608;10609;10610;10611;10612;14821;14822;14823;14824;14825;14826;14827;14828;14829;14830;14831;14832;14833;14834;14835;14836;14837;14838;14839;14840;14841;14842;20009;20010;20011;20012;20013;20014;20015;23720;23721;23722;23723;23724;23725;23726;23727;23728;23729;23730;23731;23732;23733;23734;2…	2824;4703;7864;7868;10604;14836;14841;20013;20015;23733;24097;25011;25126;30792;34375;37152;37156;37170;37173;37177;38381;38869;39710;39729;41604;42081;42463;42768;43908;44481;44486;44491;44626;44631;44838;45298;45958;46434;46440;47656;49045;49051;49687;49938;51341;51345;52138;52441;53720;53735;56213;56220;59465	302;303;304	948;949;950;951;952;953;954;955	259;343;346	42;50;52;388;441;535;664;847	Q9Y2X9;Q9Y2X9-2	Q9Y2X9;Q9Y2X9-2
sp|O00257|CBX4_HUMAN E3 SUMO-protein ligase CBX4 OS=Homo sapiens OX=9606 GN=CBX4 PE=1 SV=3;sp|O00257-3|CBX4_HUMAN Isoform 2 of E3 SUMO-protein ligase CBX4 OS=Homo sapiens OX=9606 GN=CBX4	E3 SUMO-protein ligase CBX4	CBX4	-1.12555	-1.12559	-1.77556	61.6	52.5	105390000000	48303000000	3293600000	1509500000	127410000000	37214000000	233	321	4	60	60	60	52	44	52	44	52	44	66.2	66.2	66.2	61.367	560	560;290;60;90	323.31				946	47;78;850;851;2610;2682;2712;2758;2759;3403;3404;5267;5306;5307;5364;5365;5386;5613;5614;5615;6418;7047;7150;7338;7353;7534;7660;7742;8037;8038;8039;8941;9695;10267;10268;10269;10783;11554;11707;11717;11859;11860;12566;12619;12849;12850;12868;12869;13355;13356;13389;13462;13934;13935;17372;17772;17818;17819;18031;18032	True;True;True;True;True;True;True;True;True;True;True;True;True;True;True;True;True;True;True;True;True;True;True;True;True;True;True;True;True;True;True;True;True;True;True;True;True;True;True;True;True;True;True;True;True;True;True;True;True;True;True;True;True;True;True;True;True;True;True;True	49;80;881;882;2715;2791;2821;2867;2868;3552;3553;3554;3555;5483;5524;5525;5584;5585;5606;5607;5608;5842;5843;5844;5845;5846;6686;7333;7439;7651;7669;7861;7990;8074;8380;8381;8382;9329;10114;10733;10734;10735;10736;10737;10738;11369;11370;12182;12343;12353;12501;12502;13249;13304;13547;13548;13566;13567;14092;14093;14127;14204;14704;14705;18285;18696;18697;18698;18748;18749;18967;18968	142;143;144;145;215;216;217;2539;2540;2541;2542;2543;2544;2545;2546;2547;2548;2549;2550;7679;7680;7681;7682;7683;7684;7685;7686;7876;7955;7956;7957;8074;8075;8076;8077;8078;10221;10222;10223;10224;10225;10226;10227;10228;10229;10230;10231;10232;10233;10234;10235;10236;10237;10238;10239;10240;10241;10242;10243;10244;10245;10246;10247;10248;10249;10250;10251;10252;15865;15866;15867;15868;15869;1587…	145;146;147;148;221;222;223;2768;2769;2770;2771;2772;2773;2774;2775;2776;2777;2778;2779;8187;8188;8189;8190;8191;8192;8193;8194;8195;8196;8197;8198;8199;8200;8394;8473;8474;8475;8613;8614;8615;8616;8617;8618;8619;8620;10910;10911;10912;10913;10914;10915;10916;10917;10918;10919;10920;10921;10922;10923;10924;10925;10926;10927;10928;10929;10930;10931;10932;10933;10934;10935;10936;10937;10938;10939;1…	148;222;2773;2776;8190;8394;8473;8618;8619;10919;10938;16976;17115;17117;17283;17289;17347;18028;18046;18049;20703;22928;23223;23966;24021;24841;25245;25545;26534;26538;26539;29391;31890;33688;33729;33733;35779;38417;39026;39069;39424;39428;41710;41878;42652;42673;42728;42732;44402;44405;44505;44788;46345;46356;58369;59568;59720;59725;60331;60333		303;304;305;306;307;308;309		1;67;168;233;234;270;274	O00257;O00257-3;F8WCW6;I3L4F1	O00257;O00257-3
tr|D6RA71|D6RA71_HUMAN E3 ubiquitin-protein ligase RNF4 (Fragment) OS=Homo sapiens OX=9606 GN=RNF4 PE=1 SV=1;sp|P78317|RNF4_HUMAN E3 ubiquitin-protein ligase RNF4 OS=Homo sapiens OX=9606 GN=RNF4 PE=1 SV=1;tr|H0YAI5|H0YAI5_HUMAN E3 ubiquitin-protein ligase	E3 ubiquitin-protein ligase RNF4	RNF4	3.10207	3.10207	2.51447	23.9	28.7	4092600000	35141000000	584650000	5020100000	6132800000	35042000000	6	87	10	9	9	9	3	8	3	8	3	8	28.7	28.7	28.7	21.042	188	188;190;106;43;47;54;68;89;101;113	121.19				514	1921;2368;2542;4817;10844;10845;11727;12606;12852	True;True;True;True;True;True;True;True;True	1999;2000;2463;2644;5018;11437;11438;12363;13291;13550	5668;5669;5670;5671;5672;5673;5674;5675;5676;5677;5678;5679;5680;5681;5682;5683;5684;5685;5686;5687;5688;5689;5690;5691;5692;5693;5694;5695;5696;5697;5698;5699;6967;6968;6969;6970;6971;6972;6973;6974;6975;6976;7472;7473;7474;7475;7476;7477;7478;7479;7480;14445;14446;14447;33399;33400;33401;36285;38883;38884;38885;39672	6056;6057;6058;6059;6060;6061;6062;6063;6064;6065;6066;6067;6068;6069;6070;6071;6072;6073;6074;6075;6076;6077;6078;6079;6080;6081;6082;6083;6084;6085;6086;6087;6088;7402;7403;7404;7405;7406;7407;7408;7409;7410;7411;7412;7413;7414;7415;7416;7417;7418;7419;7420;7421;7422;7423;7424;7425;7946;7947;7948;7949;7950;7951;7952;7953;7954;7955;7956;7957;7958;7959;7960;7961;7962;7963;7964;7965;15425;15426;15…	6080;7409;7956;15430;36003;36004;39086;41837;42680		200		136	D6RA71;P78317;H0YAI5;D6RJ08;D6R9E0;D6RBQ7;D6RJF5;D6RBZ1;D6RAD8;P78317-2	D6RA71;P78317;H0YAI5
sp|P11142|HSP7C_HUMAN Heat shock cognate 71 kDa protein OS=Homo sapiens OX=9606 GN=HSPA8 PE=1 SV=1;tr|E9PKE3|E9PKE3_HUMAN Heat shock cognate 71 kDa protein OS=Homo sapiens OX=9606 GN=HSPA8 PE=1 SV=1;sp|P11142-2|HSP7C_HUMAN Isoform 2 of Heat shock cognate 7	Heat shock cognate 71 kDa protein	HSPA8	5.2333	5.23331	4.54863	26.9	55.7	1019200000	38339000000	30885000	1161800000	1496300000	35018000000	42	246	16	42	42	35	17	42	17	42	14	35	55.7	55.7	49.2	70.897	646	646;627;493;500;312;410;187;171;178;183;137;223;639;132;168;150	323.31				1220	1091;1171;1387;1860;1869;2929;3785;3786;3824;5482;5878;6338;6339;6971;8034;8582;9042;9043;9662;10426;10757;10758;10761;10762;10763;10764;11437;11442;11443;11498;11569;12413;12575;12576;13332;13540;14042;14277;15583;15713;16810;16927	True;True;True;True;True;True;True;True;True;True;True;True;True;True;True;True;True;True;True;True;True;True;True;True;True;True;True;True;True;True;True;True;True;True;True;True;True;True;True;True;True;True	1128;1220;1446;1936;1945;3048;3949;3950;3951;3989;5706;6123;6599;6600;7256;8377;8955;9431;9432;10081;10928;10929;11331;11332;11333;11334;11339;11340;11341;11342;11343;11344;12059;12065;12066;12067;12068;12123;12124;12197;13087;13258;13259;13260;13261;14065;14066;14284;14818;15064;16427;16569;17701;17824	3227;3228;3229;3476;3477;4106;4107;4108;4109;4110;4111;4112;4113;4114;4115;5486;5487;5488;5489;5490;5491;5492;5493;5520;5521;5522;8602;8603;11347;11348;11349;11350;11351;11352;11353;11354;11355;11356;11357;11358;11444;11445;16487;16488;16489;17773;17774;17775;19071;19072;19073;19074;19075;19076;19077;19078;19079;19080;19081;19082;19083;19084;19085;21114;21115;21116;24558;24559;24560;24561;24562;2…	3485;3486;3487;3750;3751;4420;4421;4422;4423;4424;4425;4426;4427;4428;4429;5869;5870;5871;5872;5873;5874;5875;5876;5877;5905;5906;5907;9199;9200;12117;12118;12119;12120;12121;12122;12123;12124;12125;12126;12127;12128;12219;12220;17627;17628;17629;18981;18982;18983;18984;18985;20367;20368;20369;20370;20371;20372;20373;20374;20375;20376;20377;20378;20379;20380;20381;20382;20383;20384;22691;22692;22…	3485;3751;4427;5872;5907;9199;12118;12126;12219;17629;18983;20373;20381;22693;26515;28262;29724;29726;31776;34336;35628;35636;35664;35666;35678;35688;38021;38049;38066;38255;38455;41227;41734;41746;44307;45016;46692;47513;52319;52919;56459;56839	149;150;151	428;429;430;431;432;433;434;435	325;328;524	61;87;93;122;127;237;518;549	P11142;E9PKE3;P11142-2;E9PNE6;E9PN89;A8K7Q2;E9PLF4;E9PQQ4;E9PQK7;E9PK54;E9PPY6;E9PS65;P54652;E9PN25;E9PI65;E9PM13	P11142;E9PKE3;P11142-2;E9PNE6;E9PN89;A8K7Q2
sp|P06748-2|NPM_HUMAN Isoform 2 of Nucleophosmin OS=Homo sapiens OX=9606 GN=NPM1;sp|P06748|NPM_HUMAN Nucleophosmin OS=Homo sapiens OX=9606 GN=NPM1 PE=1 SV=2;sp|P06748-3|NPM_HUMAN Isoform 3 of Nucleophosmin OS=Homo sapiens OX=9606 GN=NPM1	Nucleophosmin	NPM1	6.51839	6.51842	6.09615	38.1	51.7	360550000	33052000000	30045000	2754300000	446320000	30533000000	18	116	5	24	24	24	7	24	7	24	7	24	51.7	51.7	51.7	29.464	265	265;294;259;111;59	323.31				1175	250;251;1924;1925;2555;4903;5284;5285;5286;9090;9091;10602;10603;10604;10694;10704;10705;15368;15369;15698;15699;15958;15993;16981	True;True;True;True;True;True;True;True;True;True;True;True;True;True;True;True;True;True;True;True;True;True;True;True	262;263;264;2003;2004;2005;2657;5107;5501;5502;5503;5504;9481;9482;9483;11147;11148;11149;11150;11151;11152;11259;11260;11270;11271;11272;11273;16200;16201;16202;16203;16548;16549;16550;16551;16552;16553;16819;16858;17878	791;792;793;794;795;796;797;798;799;800;801;802;803;804;805;806;807;808;809;810;811;812;813;5704;5705;5706;5707;5708;5709;5710;5711;7517;7518;7519;7520;14731;14732;15924;15925;15926;15927;15928;15929;15930;15931;15932;15933;15934;15935;15936;15937;15938;15939;27745;27746;27747;27748;27749;27750;27751;27752;27753;32515;32516;32517;32518;32519;32520;32521;32522;32523;32524;32525;32526;32527;32528;3…	850;851;852;853;854;855;856;857;858;859;860;861;862;863;864;865;866;867;868;869;870;871;872;873;874;875;876;877;878;879;880;881;6093;6094;6095;6096;6097;6098;6099;6100;8005;8006;8007;8008;15742;15743;15744;17042;17043;17044;17045;17046;17047;17048;17049;17050;17051;17052;17053;17054;17055;17056;17057;17058;29909;29910;29911;29912;29913;29914;29915;29916;29917;35029;35030;35031;35032;35033;35034;3…	850;863;6094;6100;8006;15742;17045;17050;17058;29911;29913;35030;35045;35046;35381;35434;35451;51544;51556;52750;52826;53762;53883;57059	129;130;131;132;133;134;135;136	410;411;412;413	32;54;141;210;219;221;228;238	65;81;222;249	P06748-2;P06748;P06748-3;E5RI98;E5RGW4	P06748-2;P06748;P06748-3
sp|P61956-2|SUMO2_HUMAN Isoform 2 of Small ubiquitin-related modifier 2 OS=Homo sapiens OX=9606 GN=SUMO2;sp|P61956|SUMO2_HUMAN Small ubiquitin-related modifier 2 OS=Homo sapiens OX=9606 GN=SUMO2 PE=1 SV=3	Small ubiquitin-related modifier 2	SUMO2	-0.410316	-0.410355	-1.09829	49.3	62	49830000000	37495000000	16610000000	12498000000	65168000000	30438000000	13	41	3	10	10	6	9	9	9	9	6	5	62	62	45.1	8.1111	71	71;95;95	323.31				1526	224;225;226;2904;5857;14718;14719;15835;15836;15837	True;True;True;True;True;True;True;True;True;True	231;232;233;234;235;236;237;238;3019;3020;6102;15521;15522;15523;16694;16695;16696	628;629;630;631;632;633;634;635;636;637;638;639;640;641;642;643;644;645;646;647;648;649;650;651;652;653;654;655;656;657;658;659;660;661;662;663;664;665;666;667;668;669;670;671;672;673;674;675;676;677;678;679;680;681;682;683;684;685;686;687;688;689;690;691;692;693;694;695;696;697;698;699;700;701;702;703;704;705;706;707;708;709;710;711;8489;8490;8491;8492;8493;8494;8495;8496;8497;8498;8499;8500;850…	670;671;672;673;674;675;676;677;678;679;680;681;682;683;684;685;686;687;688;689;690;691;692;693;694;695;696;697;698;699;700;701;702;703;704;705;706;707;708;709;710;711;712;713;714;715;716;717;718;719;720;721;722;723;724;725;726;727;728;729;730;731;732;733;734;735;736;737;738;739;740;741;742;743;744;745;746;747;748;749;750;751;752;753;754;755;756;757;758;759;760;9075;9076;9077;9078;9079;9080;9081;…	683;696;760;9079;18920;49311;49324;53318;53329;53341	48;52;190;191;192;193;194	134	5;7;11;21;33;35;42	44	P61956-2;P61956;Q6EEV6	P61956-2;P61956
tr|A0A3F2YNW7|A0A3F2YNW7_HUMAN AT-rich interactive domain-containing protein 1B OS=Homo sapiens OX=9606 GN=ARID1B PE=1 SV=1;tr|A0A1B0GVK1|A0A1B0GVK1_HUMAN AT-rich interactive domain-containing protein 1B OS=Homo sapiens OX=9606 GN=ARID1B PE=1 SV=1;sp|Q8NFD	AT-rich interactive domain-containing protein 1B	ARID1B	0.185643	0.185653	0.0186679	43.6	47	28786000000	32739000000	373840000	425180000	29408000000	29791000000	263	541	12	99	99	4	76	84	76	84	3	2	51.4	51.4	3.4	245.48	2332	2332;1539;1486;727;186;84;93;97;191;97;2332;276	323.31				306	1;34;1017;1285;2102;2272;2388;2389;2850;2958;2959;3002;3091;3092;3279;3726;3800;4239;4496;4542;4691;4772;5429;5430;5654;5658;5659;5660;5780;5781;5794;6065;6066;6067;6650;6997;7190;7553;7579;7765;8600;8601;8852;9322;9657;10055;10595;10600;10679;10882;11344;11345;11508;11698;11699;11800;11849;11936;11937;12296;12297;12300;12534;12625;12627;12628;12769;12790;12857;13154;13379;13411;13459;13510;13511…	True;True;True;True;True;True;True;True;True;True;True;True;True;True;True;True;True;True;True;True;True;True;True;True;True;True;True;True;True;True;True;True;True;True;True;True;True;True;True;True;True;True;True;True;True;True;True;True;True;True;True;True;True;True;True;True;True;True;True;True;True;True;True;True;True;True;True;True;True;True;True;True;True;True;True;True;True;True;True;True…	1;36;1053;1342;1343;2185;2359;2360;2484;2485;2961;2962;3080;3081;3125;3220;3221;3419;3420;3421;3887;3888;3889;3965;4420;4686;4733;4734;4890;4973;5651;5652;5886;5892;5893;5894;5895;6021;6022;6036;6317;6318;6319;6928;7282;7490;7491;7880;7906;8098;8099;8973;8974;9238;9731;10076;10484;10485;11139;11144;11145;11243;11478;11479;11965;11966;12134;12135;12136;12334;12335;12440;12491;12579;12580;12581;125…	1;2;95;96;97;3018;3019;3803;3804;3805;3806;3807;3808;3809;3810;3811;3812;3813;3814;3815;3816;3817;3818;6193;6194;6634;6635;6636;6637;6638;6639;6640;6641;6642;6643;6644;6645;6646;6647;6648;6649;6650;6651;6652;6653;6654;7030;7031;7032;7033;7034;7035;7036;7037;8308;8309;8310;8311;8722;8723;8724;8725;8726;8727;8728;8859;8860;8861;8862;8863;8864;8865;8866;8867;8868;8869;8870;8871;8872;9208;9209;9210;9…	1;2;97;98;99;3261;3262;4110;4111;4112;4113;4114;4115;4116;4117;4118;4119;4120;4121;4122;4123;4124;4125;6602;6603;7050;7051;7052;7053;7054;7055;7056;7057;7058;7059;7060;7061;7062;7063;7064;7065;7066;7067;7068;7069;7070;7071;7072;7073;7479;7480;7481;7482;7483;7484;7485;7486;7487;7488;7489;7490;7491;7492;7493;7494;8857;8858;8859;8860;8861;8862;9322;9323;9324;9325;9326;9327;9328;9329;9330;9462;9463;9…	1;97;3261;4119;6602;7072;7484;7494;8859;9324;9330;9465;9833;9844;10476;11905;12163;13553;14317;14460;15038;15279;17476;17482;18208;18232;18233;18236;18687;18695;18732;19565;19569;19575;21498;22757;23493;24901;24969;25643;28320;28321;29133;30653;31761;32949;34998;35025;35307;36154;37741;37747;38295;38987;38989;39263;39407;39683;39692;40835;40846;40862;41637;41906;41922;41923;42377;42442;42693;4373…		56;57;58;59;60;61;62;63;64;65;66;67;68;69;70;71;72;73;74;109;110;111;112;113;114;115;116;117;118;119;120;121;122;123		57;84;142;461;462;463;512;513;562;584;593;601;604;606;727;1033;1163;1337;1347;1349;1353;1356;1389;1392;1477;1486;1554;1576;1582;1583;1667;2048;2213;2215	A0A3F2YNW7;A0A1B0GVK1;Q8NFD5-4;H0Y2R3;A0A1B0GU09;A0A1B0GUC6;A0A1B0GV92;A0A1B0GUG2;A0A1B0GU65;A0A1B0GTE8;REV__A0A3F2YNW7;Q9Y651	A0A3F2YNW7;A0A1B0GVK1;Q8NFD5-4
sp|Q96QC0|PP1RA_HUMAN Serine/threonine-protein phosphatase 1 regulatory subunit 10 OS=Homo sapiens OX=9606 GN=PPP1R10 PE=1 SV=1	Serine/threonine-protein phosphatase 1 regulatory subunit 10	PPP1R10	3.61191	3.61194	2.7813	34	46.2	2639000000	32265000000	47981000	586640000	4326000000	29740000000	57	263	1	53	53	53	26	48	26	48	26	48	48.3	48.3	48.3	99.057	940	940	323.31				2260	2980;3031;3032;3162;3163;3456;3661;3971;4303;4823;4867;4875;4978;4979;5079;5080;5277;5278;5279;5397;5398;6351;6384;7446;7703;7704;7800;7973;9015;9336;10848;10849;11716;12371;12372;12730;13953;14160;14161;14292;14293;14359;14448;15568;15569;15570;15577;15578;16368;16593;17674;17675;17803	True;True;True;True;True;True;True;True;True;True;True;True;True;True;True;True;True;True;True;True;True;True;True;True;True;True;True;True;True;True;True;True;True;True;True;True;True;True;True;True;True;True;True;True;True;True;True;True;True;True;True;True;True	3102;3154;3155;3293;3294;3608;3820;4144;4487;5024;5025;5071;5079;5184;5185;5288;5289;5493;5494;5495;5496;5619;5620;6612;6613;6649;7765;8034;8035;8135;8314;8315;9403;9746;11442;11443;12352;13045;13046;13419;14723;14942;14943;15079;15080;15147;15239;16412;16413;16414;16421;16422;17245;17473;18595;18596;18732	8784;8785;8786;8787;8788;8789;8790;8963;8964;8965;8966;8967;8968;9421;9422;9423;9424;9425;9426;9427;10411;10412;10413;10414;10415;10416;10417;10418;10419;10420;10984;10985;11943;11944;11945;11946;12913;12914;12915;14456;14457;14458;14459;14460;14461;14462;14463;14464;14465;14612;14613;14614;14615;14616;14617;14638;14639;14640;14952;14953;14954;14955;14956;14957;14958;14959;14960;14961;14962;14963…	9386;9387;9388;9389;9390;9391;9392;9580;9581;9582;9583;9584;9585;10049;10050;10051;10052;10053;10054;10055;11103;11104;11105;11106;11107;11108;11109;11110;11111;11112;11113;11114;11115;11116;11117;11118;11119;11120;11121;11122;11123;11124;11125;11126;11127;11128;11129;11732;11733;12749;12750;12751;12752;13774;13775;13776;15440;15441;15442;15443;15444;15445;15446;15447;15448;15449;15450;15601;1560…	9388;9580;9584;10049;10055;11113;11733;12752;13776;15442;15602;15636;15975;15979;16355;16361;17006;17009;17018;17380;17381;20452;20586;24301;25398;25399;25786;26333;29641;30779;36018;36025;39064;41101;41107;42213;46421;47104;47105;47562;47571;47785;48093;52268;52270;52271;52291;52296;55027;55746;59271;59275;59674		842;843;844;845		141;286;589;687	Q96QC0	Q96QC0
sp|O60563|CCNT1_HUMAN Cyclin-T1 OS=Homo sapiens OX=9606 GN=CCNT1 PE=1 SV=1	Cyclin-T1	CCNT1	1.72019	1.72022	1.11937	45	44.9	10407000000	34289000000	400260000	1318800000	13633000000	29618000000	95	233	3	38	38	37	27	31	27	31	26	30	52.9	52.9	50.6	80.684	726	726;184;184	323.31				1045	167;845;3354;3355;3949;3950;4527;5282;5830;5831;6426;6712;6713;7661;8173;9291;10586;10587;10647;10648;10649;11741;12087;12281;12585;12620;13120;13406;14090;15474;15766;15767;15844;16008;16220;16904;17333;17334	True;True;True;True;True;True;True;True;True;True;True;True;True;True;True;True;True;True;True;True;True;True;True;True;True;True;True;True;True;True;True;True;True;True;True;True;True;True	171;875;3500;3501;4122;4123;4717;4718;5499;6074;6075;6694;6990;6991;7991;8525;9698;9699;11128;11129;11130;11204;11205;11206;11207;11208;12380;12740;12741;12944;12945;13270;13305;13836;14144;14869;16309;16623;16624;16703;16874;17091;17801;18242;18243	478;479;480;2456;2457;2458;2459;2460;10066;10067;10068;10069;10070;11879;11880;11881;11882;11883;11884;11885;11886;11887;11888;11889;11890;13513;13514;13515;13516;13517;13518;15910;15911;15912;15913;15914;15915;15916;15917;17639;17640;17641;19412;19413;19414;19415;19416;19417;19418;19419;19420;19421;19422;19423;19424;20291;20292;20293;20294;20295;20296;20297;20298;20299;20300;20301;20302;20303;20…	495;496;497;2572;2573;2574;2575;2576;2577;10744;10745;10746;10747;10748;12681;12682;12683;12684;12685;12686;12687;12688;12689;12690;12691;12692;12693;12694;12695;14405;14406;14407;14408;14409;14410;17028;17029;17030;17031;17032;17033;17034;17035;18842;18843;18844;20736;20737;20738;20739;20740;20741;20742;20743;20744;20745;20746;20747;20748;20749;20750;21676;21677;21678;21679;21680;21681;21682;216…	496;2574;10746;10748;12685;12695;14406;17031;18842;18844;20748;21677;21692;25254;26882;30550;34959;34968;35201;35216;35228;39123;40218;40777;41772;41894;43601;44581;46852;51924;53074;53085;53369;53921;54547;56772;58217;58229		344;345;346;347;348;349		48;66;71;410;439;462	O60563;A0A1W2PQ16;O60563-2	O60563
sp|Q13433|S39A6_HUMAN Zinc transporter ZIP6 OS=Homo sapiens OX=9606 GN=SLC39A6 PE=1 SV=3	Zinc transporter ZIP6	SLC39A6	-0.511892	-0.511892	-0.434095	23.3	26.1	35628000000	24986000000	1781400000	1249300000	38635000000	28596000000	62	129	3	24	24	24	18	19	18	19	18	19	29.7	29.7	29.7	85.046	755	755;273;433	323.31				1668	32;295;906;2433;2434;2531;6243;6897;7179;7507;7508;7598;9056;9057;9058;11423;11601;11602;12175;12505;12771;15975;17499;17500	True;True;True;True;True;True;True;True;True;True;True;True;True;True;True;True;True;True;True;True;True;True;True;True	34;311;312;939;2530;2531;2633;6502;7181;7477;7833;7834;7927;9445;9446;9447;12045;12231;12232;12831;13183;13465;16837;18412;18413	89;90;91;92;93;933;934;935;936;937;938;939;940;941;942;943;944;945;946;2702;7161;7162;7163;7164;7165;7166;7167;7168;7169;7445;7446;7447;18780;18781;18782;18783;18784;18785;18786;18787;20865;20866;20867;20868;20869;20870;20871;20872;20873;20874;20875;20876;20877;20878;20879;20880;20881;20882;20883;20884;20885;20886;20887;20888;20889;20890;20891;20892;20893;20894;20895;20896;21823;21824;21825;22829…	91;92;93;94;95;1002;1003;1004;1005;1006;1007;1008;1009;1010;1011;1012;1013;1014;1015;1016;1017;1018;1019;1020;2934;7628;7629;7630;7631;7632;7633;7634;7635;7636;7637;7917;7918;7919;7920;7921;20061;20062;20063;20064;20065;20066;20067;20068;20069;20070;22424;22425;22426;22427;22428;22429;22430;22431;22432;22433;22434;22435;22436;22437;22438;22439;22440;22441;22442;22443;22444;22445;22446;22447;22448…	91;1011;2934;7634;7636;7918;20067;22425;23450;24535;24544;25059;29775;29785;29787;37982;38557;38569;40436;41521;42383;53828;58740;58744		658		518	Q13433;K7EQ91;Q13433-2	Q13433
sp|P04843|RPN1_HUMAN Dolichyl-diphosphooligosaccharide--protein glycosyltransferase subunit 1 OS=Homo sapiens OX=9606 GN=RPN1 PE=1 SV=1;tr|B7Z4L4|B7Z4L4_HUMAN Dolichyl-diphosphooligosaccharide--protein glycosyltransferase subunit 1 OS=Homo sapiens OX=9606	Dolichyl-diphosphooligosaccharide--protein glycosyltransferase subunit 1	RPN1	0.429078	0.429106	0.00168676	70.5	65.7	21627000000	29118000000	584500000	786970000	26499000000	26530000000	143	241	3	54	54	54	49	43	49	43	49	43	73.5	73.5	73.5	68.569	607	607;435;121	323.31				1157	1108;1215;1216;1596;2471;2472;2473;2523;2524;3887;4240;4435;4689;5667;5668;5852;5993;6331;6931;7578;7889;7890;7891;8003;8433;8434;8719;8720;8755;9352;11028;11029;11030;11279;11588;11853;11904;12264;12829;13019;13126;13127;13128;13688;14931;14974;15618;15619;16257;16282;16283;16856;16951;17475	True;True;True;True;True;True;True;True;True;True;True;True;True;True;True;True;True;True;True;True;True;True;True;True;True;True;True;True;True;True;True;True;True;True;True;True;True;True;True;True;True;True;True;True;True;True;True;True;True;True;True;True;True;True	1145;1268;1269;1660;2570;2571;2572;2625;2626;4054;4421;4624;4888;5902;5903;6097;6242;6592;7216;7905;8224;8225;8226;8346;8793;8794;9102;9103;9139;9764;11630;11631;11632;11894;12216;12495;12547;12926;13525;13723;13842;13843;13844;14435;15740;15783;16466;16467;17129;17130;17155;17156;17748;17848;18388	3265;3266;3267;3268;3269;3270;3271;3272;3273;3604;3605;3606;3607;3608;3609;3610;3611;3612;3613;3614;3615;3616;3617;3618;3619;3620;3621;4709;4710;4711;4712;4713;4714;4715;4716;4717;4718;4719;4720;4721;4722;7269;7270;7271;7272;7273;7274;7275;7276;7277;7278;7279;7280;7425;7426;7427;7428;7429;7430;7431;7432;7433;7434;7435;7436;11660;11661;11662;11663;11664;12719;12720;12721;12722;12723;13287;13288;13…	3524;3525;3526;3527;3528;3529;3530;3531;3532;3533;3900;3901;3902;3903;3904;3905;3906;3907;3908;3909;3910;3911;3912;3913;3914;3915;3916;3917;5053;5054;5055;5056;5057;5058;5059;5060;5061;5062;5063;5064;5065;5066;5067;5068;5069;5070;5071;5072;5073;5074;5075;7737;7738;7739;7740;7741;7742;7743;7744;7745;7746;7747;7748;7896;7897;7898;7899;7900;7901;7902;7903;7904;7905;7906;7907;7908;12443;12444;12445;1…	3531;3905;3916;5060;7737;7742;7748;7901;7905;12446;13557;14177;15028;18264;18268;18893;19334;20354;22562;24962;26060;26074;26078;26432;27737;27741;28681;28686;28833;30827;36646;36653;36655;37510;38507;39412;39570;40714;42574;43235;43622;43627;43632;45474;49972;50113;52471;52472;54670;54744;54750;56595;56919;58645		400		230	P04843;B7Z4L4;F8WF32	P04843;B7Z4L4
sp|Q9ULF5|S39AA_HUMAN Zinc transporter ZIP10 OS=Homo sapiens OX=9606 GN=SLC39A10 PE=1 SV=2	Zinc transporter ZIP10	SLC39A10	-0.816817	-0.816808	-1.08445	24.8	27.8	46083000000	26161000000	1440100000	817540000	53415000000	25189000000	133	153	4	34	34	34	26	24	26	24	26	24	35	35	35	94.131	831	831;126;130;381	323.31				2556	1820;2680;3535;4708;4709;4930;4931;5218;5219;7688;7689;7778;9123;9124;9134;9235;9259;9635;10327;10967;10968;11000;11326;11327;11744;12256;12257;13910;15410;16231;16240;17066;17257;18006	True;True;True;True;True;True;True;True;True;True;True;True;True;True;True;True;True;True;True;True;True;True;True;True;True;True;True;True;True;True;True;True;True;True	1894;2789;3690;4908;4909;5134;5135;5432;5433;5434;5435;8019;8020;8112;9515;9516;9526;9640;9664;10054;10809;11564;11565;11598;11947;11948;12383;12918;12919;14680;16245;17103;17112;17966;18164;18942	5382;5383;5384;5385;5386;5387;7872;10631;14121;14122;14123;14124;14125;14126;14127;14128;14129;14792;14793;14794;14795;14796;14797;14798;14799;14800;14801;14802;14803;14804;14805;14806;14807;14808;15677;15678;15679;15680;15681;15682;15683;15684;15685;15686;15687;15688;15689;15690;15691;15692;15693;15694;15695;15696;15697;15698;15699;15700;15701;15702;15703;15704;15705;23450;23451;23452;23453;2345…	5756;5757;5758;5759;5760;5761;8390;11370;15075;15076;15077;15078;15079;15080;15081;15082;15083;15084;15085;15086;15087;15088;15089;15090;15091;15092;15093;15807;15808;15809;15810;15811;15812;15813;15814;15815;15816;15817;15818;15819;15820;15821;15822;15823;15824;16756;16757;16758;16759;16760;16761;16762;16763;16764;16765;16766;16767;16768;16769;16770;16771;16772;16773;16774;16775;16776;16777;1677…	5756;8390;11370;15080;15091;15818;15823;16763;16782;25333;25369;25695;30002;30011;30048;30375;30428;31704;33920;36411;36427;36511;37671;37678;39128;40690;40697;46269;51704;54586;54612;57322;57954;60267	299;300	936;937	519;522	43;517	Q9ULF5;E7ENT5;E7EV45;Q9ULF5-2	Q9ULF5
sp|P04264|K2C1_HUMAN Keratin, type II cytoskeletal 1 OS=Homo sapiens OX=9606 GN=KRT1 PE=1 SV=6;	Keratin, type II cytoskeletal 1	KRT1	-0.520559	-0.520632	-0.82758	59.2	54.3	35190000000	24531000000	1135200000	791310000	41214000000	23223000000	159	215	3	56	56	40	52	44	52	44	39	31	60.6	60.6	52.8	66.038	644	644;644;99	323.31			+	1151	308;309;1375;1376;2487;2562;3345;3388;4079;4080;4705;4837;4896;5453;5454;6052;7634;7904;8067;8068;9071;9216;9217;9574;9575;11109;11110;11132;11318;11319;11494;12005;12006;12860;12889;13093;13094;13370;13561;13578;13579;13659;13660;13779;13780;13856;13857;14912;14913;15166;15290;15291;15292;17254;17478;17481	True;True;True;True;True;True;True;True;True;True;True;True;True;True;True;True;True;True;True;True;True;True;True;True;True;True;True;True;True;True;True;True;True;True;True;True;True;True;True;True;True;True;True;True;True;True;True;True;True;True;True;True;True;True;True;True	325;326;1433;1434;2586;2587;2664;2665;3491;3536;4254;4255;4905;5039;5100;5676;5677;6304;7964;8239;8412;8413;8414;8415;8416;8417;9460;9461;9618;9619;9993;9994;11715;11716;11740;11935;11936;11937;11938;11939;11940;12119;12654;12655;13558;13590;13807;13808;13809;14107;14305;14322;14323;14406;14407;14536;14537;14616;14617;15721;15722;15984;16118;16119;16120;16121;18161;18391;18394	991;992;993;994;995;996;997;998;999;1000;4064;4065;4066;4067;4068;4069;4070;7300;7301;7302;7303;7533;7534;7535;7536;7537;7538;7539;7540;7541;10030;10031;10032;10166;10167;10168;12254;12255;12256;12257;12258;12259;12260;12261;12262;12263;14115;14504;14505;14506;14507;14508;14509;14510;14511;14512;14513;14709;16416;16417;16418;16419;16420;16421;18279;18280;18281;18282;23291;23292;24165;24166;24167;…	1069;1070;1071;1072;1073;1074;1075;1076;1077;1078;4374;4375;4376;4377;4378;4379;4380;4381;7768;7769;7770;7771;8021;8022;8023;8024;8025;8026;8027;8028;8029;10704;10705;10706;10850;10851;10852;13069;13070;13071;13072;13073;13074;13075;13076;13077;13078;13079;15069;15489;15490;15491;15492;15493;15494;15495;15496;15497;15498;15720;17555;17556;17557;17558;17559;17560;19517;19518;19519;19520;25168;2516…	1070;1078;4376;4381;7770;8023;10706;10851;13074;13076;15069;15493;15720;17557;17560;19519;25169;26108;26611;26617;29828;30323;30326;31497;31502;36905;36913;37028;37625;37645;38240;39939;39941;42697;42816;43533;43538;44434;45072;45122;45132;45402;45409;45783;45787;46057;46059;49889;49905;50821;51287;51292;51298;57938;58651;58655		171;395;396;397		259;262;296;469	P04264;CON__P04264;CON__H-INV:HIT000016045	P04264;CON__P04264
sp|Q6P1X5|TAF2_HUMAN Transcription initiation factor TFIID subunit 2 OS=Homo sapiens OX=9606 GN=TAF2 PE=1 SV=3	Transcription initiation factor TFIID subunit 2	TAF2	2.94733	2.9474	2.08954	23.3	44.8	3086000000	23803000000	47476000	366210000	4798500000	20423000000	73	276	4	57	57	47	26	57	26	57	19	47	44.8	44.8	36.7	136.97	1199	1199;285;60;67	323.31				1890	373;2090;2105;2535;2536;3324;3594;4249;4276;4320;4321;4515;4731;4858;4997;5474;5727;5858;5887;5888;5938;6011;6244;6549;7299;7342;7394;7419;7662;7705;7717;7749;8597;9095;9193;10696;10969;11102;11606;11607;11715;12492;13564;14450;14477;14483;14754;14842;14843;15104;15281;15318;16010;16747;17034;17496;17497	True;True;True;True;True;True;True;True;True;True;True;True;True;True;True;True;True;True;True;True;True;True;True;True;True;True;True;True;True;True;True;True;True;True;True;True;True;True;True;True;True;True;True;True;True;True;True;True;True;True;True;True;True;True;True;True;True	393;394;2173;2188;2637;2638;3468;3469;3470;3752;4432;4460;4505;4506;4705;4932;5061;5062;5203;5697;5966;6103;6133;6134;6184;6185;6186;6260;6261;6503;6819;7609;7655;7656;7657;7710;7711;7738;7992;8036;8048;8081;8082;8970;9487;9588;9589;11262;11566;11707;12236;12237;12351;13170;14308;15241;15268;15274;15561;15649;15650;15917;16106;16148;16149;16876;17636;17933;18409;18410	1179;1180;1181;1182;1183;1184;1185;1186;1187;1188;1189;1190;1191;1192;6163;6164;6165;6199;6200;6201;6202;6203;6204;7455;7456;7457;7458;7459;9954;9955;9956;9957;9958;9959;9960;9961;9962;9963;9964;9965;9966;9967;9968;9969;9970;9971;9972;9973;10797;10798;10799;10800;10801;12769;12770;12851;12852;12972;12973;12974;12975;12976;12977;12978;12979;13480;13481;13482;13483;13484;14198;14199;14200;14201;142…	1259;1260;1261;1262;1263;1264;1265;1266;1267;1268;1269;1270;1271;1272;6572;6573;6574;6608;6609;6610;6611;6612;6613;7929;7930;7931;7932;7933;10625;10626;10627;10628;10629;10630;10631;10632;10633;10634;10635;10636;10637;10638;10639;10640;10641;10642;10643;10644;11542;11543;11544;11545;11546;13617;13618;13709;13710;13833;13834;13835;13836;13837;13838;13839;13840;14371;14372;14373;14374;14375;15164;1…	1271;6574;6613;7929;7931;10644;11542;13617;13709;13834;13840;14373;15165;15575;16050;17603;18489;18921;19014;19026;19162;19385;20080;21129;23875;23993;24144;24227;25261;25404;25487;25576;28314;29923;30250;35404;36434;36890;38579;38584;39057;41466;45078;48106;48181;48197;49443;49663;49669;50564;51260;51391;53926;56244;57213;58725;58736		243;244;247;739;740;741;742;743;744;745;746;747;748		170;607;614;619;634;648;709;719;742;798;957;1121;1123	Q6P1X5;H0YC37;E5RI28;H0YB55	Q6P1X5
tr|A0A2R8Y6I6|A0A2R8Y6I6_HUMAN Dual-specificity tyrosine-phosphorylation-regulated kinase 1A OS=Homo sapiens OX=9606 GN=DYRK1A PE=1 SV=1;tr|A0A2R8Y443|A0A2R8Y443_HUMAN Dual-specificity tyrosine-phosphorylation-regulated kinase 1A (Fragment) OS=Homo sapiens	Dual-specificity tyrosine-phosphorylation-regulated kinase 1A	DIRK1A	1.82432	1.82428	0.81906	37.4	48.4	6789400000	24044000000	234120000	829090000	10995000000	19398000000	92	214	10	51	51	1	33	45	33	45	1	0	50.9	50.9	1.8	81.598	725	725;400;589;601;629;172;137;23;528;601	323.31				264	494;620;677;1781;3666;3853;3854;4019;5390;5564;5565;5722;6772;6773;7024;7034;7139;7173;7274;7275;7490;7491;7538;7709;7784;7785;8510;8511;8877;8878;9303;9728;10462;10593;10594;11868;12271;12529;12750;12751;12837;12838;15751;15752;16033;17191;17192;17340;17486;18007;18008	True;True;True;True;True;True;True;True;True;True;True;True;True;True;True;True;True;True;True;True;True;True;True;True;True;True;True;True;True;True;True;True;True;True;True;True;True;True;True;True;True;True;True;True;True;True;True;True;True;True;True	519;646;703;1852;3825;4020;4021;4192;5612;5793;5794;5960;7052;7053;7310;7320;7428;7469;7583;7584;7814;7815;7865;8040;8119;8120;8876;8877;9263;9264;9265;9711;10149;10977;11136;11137;11138;12510;12511;12933;13210;13442;13443;13444;13534;13535;16608;16609;16901;18097;18098;18249;18250;18399;18943;18944	1496;1497;1498;1499;1830;1831;1832;1833;1834;1835;1836;1837;1838;1986;1987;5247;5248;5249;5250;5251;5252;5253;5254;5255;5256;10992;10993;11542;11543;11544;11545;11546;12055;12056;12057;12058;12059;12060;12061;16236;16237;16238;16729;16730;16731;16732;17274;17275;17276;17277;20522;20523;20524;20525;20526;20527;20528;20529;20530;20531;20532;20533;20534;20535;20536;20537;20538;20539;20540;20541;2127…	1578;1579;1580;1581;1923;1924;1925;1926;1927;1928;1929;1930;1931;2085;2086;5615;5616;5617;5618;5619;5620;5621;5622;5623;5624;11740;11741;12319;12320;12321;12322;12323;12861;12862;12863;12864;12865;12866;12867;12868;17365;17366;17367;17884;17885;17886;17887;18469;18470;18471;18472;22070;22071;22072;22073;22074;22075;22076;22077;22078;22079;22080;22081;22082;22083;22084;22085;22086;22087;22088;2208…	1579;1930;2085;5621;11741;12320;12322;12867;17366;17885;17887;18469;22078;22088;22848;22888;23204;23418;23805;23808;24479;24487;24859;25464;25746;25748;28008;28011;29199;29204;30581;32012;34494;34985;34992;39460;40739;41618;42303;42313;42609;42612;53033;53037;54038;57753;57754;58258;58689;60270;60271		87;88;89;90;91		43;118;172;179;694	A0A2R8Y6I6;A0A2R8Y443;Q9Y463-2;Q9Y463-3;Q9Y463;M0R131;M0R2X3;N0GVR9;Q92630-2;Q92630	A0A2R8Y6I6;A0A2R8Y443
sp|Q96AQ6-2|PBIP1_HUMAN Isoform 2 of Pre-B-cell leukemia transcription factor-interacting protein 1 OS=Homo sapiens OX=9606 GN=PBXIP1;sp|Q96AQ6|PBIP1_HUMAN Pre-B-cell leukemia transcription factor-interacting protein 1 OS=Homo sapiens OX=9606 GN=PBXIP1 PE=	Pre-B-cell leukemia transcription factor-interacting protein 1	PBXIP1	1.62842	1.6284	1.03367	36.2	44.7	6875100000	21256000000	237070000	732950000	9464000000	19375000000	74	206	5	38	38	38	30	37	30	37	30	37	44.7	44.7	44.7	77.683	702	702;731;662;315;147	323.31				2194	953;1078;2409;2895;3189;3190;3331;3339;3352;3353;3358;3359;4599;4674;5089;5090;7424;8929;9037;9038;9039;9359;10208;11646;11812;11813;11841;11842;12024;12025;12291;12450;12451;12716;13796;14659;17367;17404	True;True;True;True;True;True;True;True;True;True;True;True;True;True;True;True;True;True;True;True;True;True;True;True;True;True;True;True;True;True;True;True;True;True;True;True;True;True	986;1115;2505;3009;3320;3321;3477;3485;3498;3499;3504;3505;4793;4873;5298;5299;7743;9317;9425;9426;9427;9428;9771;10655;10656;12278;12452;12453;12483;12484;12673;12674;12957;13128;13129;13405;14553;15456;18280;18317	2834;2835;2836;2837;2838;2839;3191;3192;7096;7097;7098;7099;7100;7101;7102;7103;7104;7105;8441;8442;8443;8444;8445;8446;8447;8448;8449;8450;8451;9494;9495;9496;9497;9498;9499;9500;9501;9502;9503;9504;9505;9506;9507;9508;9509;9510;9991;9992;9993;9994;9995;9996;10015;10016;10017;10018;10019;10020;10021;10022;10056;10057;10058;10059;10060;10061;10062;10063;10064;10065;10075;10076;10077;10078;10079;1…	3072;3073;3074;3075;3076;3077;3449;3450;7553;7554;7555;7556;7557;7558;7559;7560;7561;7562;7563;7564;7565;7566;7567;7568;7569;7570;7571;7572;9024;9025;9026;9027;9028;9029;9030;9031;9032;9033;9034;9035;9036;9037;10125;10126;10127;10128;10129;10130;10131;10132;10133;10134;10135;10136;10137;10138;10139;10140;10141;10142;10143;10144;10145;10146;10147;10148;10149;10150;10662;10663;10664;10665;10666;106…	3075;3450;7562;9031;10127;10148;10666;10694;10735;10741;10753;10764;14662;14977;16390;16392;24242;29360;29693;29707;29716;30845;33422;38788;39290;39295;39380;39386;39994;40008;40823;41353;41362;42175;45833;49089;58345;58452		827;828		1;271	Q96AQ6-2;Q96AQ6;Q96AQ6-3;Q5T173;F2Z2Z8	Q96AQ6-2;Q96AQ6;Q96AQ6-3
sp|Q9HCK8|CHD8_HUMAN Chromodomain-helicase-DNA-binding protein 8 OS=Homo sapiens OX=9606 GN=CHD8 PE=1 SV=5;sp|Q9HCK8-2|CHD8_HUMAN Isoform 2 of Chromodomain-helicase-DNA-binding protein 8 OS=Homo sapiens OX=9606 GN=CHD8;tr|A0A2R8Y840|A0A2R8Y840_HUMAN Chromo	Chromodomain-helicase-DNA-binding protein 8	CHD8	0.76635	0.766348	0.110595	43.3	41.8	13530000000	23014000000	124130000	211140000	17534000000	18931000000	237	428	8	126	126	37	91	109	91	109	30	29	46.4	46.4	16.9	290.52	2581	2581;2302;1995;1102;586;305;98;151	323.31				2407	683;1232;1246;1388;1429;1431;1686;1918;1997;1998;1999;2805;2818;2943;2944;3194;3195;3204;3263;3362;3363;3373;4057;4058;4578;4579;4657;4764;5201;5202;5203;5372;5373;5673;5678;5755;6449;6716;6757;6980;7013;7043;7044;7056;7073;7159;7160;7245;7246;7251;7318;7470;7471;7802;8135;8153;8154;8412;8691;9167;9168;9286;9327;9371;9736;9944;10579;10653;10841;10950;11137;11138;11349;11531;11869;11870;11872;1220…	True;True;True;True;True;True;True;True;True;True;True;True;True;True;True;True;True;True;True;True;True;True;True;True;True;True;True;True;True;True;True;True;True;True;True;True;True;True;True;True;True;True;True;True;True;True;True;True;True;True;True;True;True;True;True;True;True;True;True;True;True;True;True;True;True;True;True;True;True;True;True;True;True;True;True;True;True;True;True;True…	709;1286;1300;1447;1489;1491;1752;1753;1996;2077;2078;2079;2915;2916;2929;3063;3064;3326;3327;3336;3398;3508;3509;3510;3521;4231;4232;4233;4770;4771;4772;4856;4965;5413;5414;5415;5592;5593;5908;5913;5994;6717;6994;7037;7265;7298;7329;7330;7342;7360;7448;7449;7450;7552;7553;7559;7629;7791;7792;8137;8486;8504;8505;8772;9072;9559;9560;9693;9737;9784;10157;10370;11119;11120;11121;11214;11434;11547;11…	1997;1998;1999;2000;3665;3666;3667;3668;3669;3670;3702;3703;4116;4117;4118;4212;4216;4217;4218;4219;4220;4221;4222;4223;4224;4998;4999;5000;5001;5002;5003;5004;5005;5658;5659;5660;5661;5876;5877;5878;5879;5880;5881;5882;5883;5884;5885;5886;5887;5888;5889;8202;8203;8204;8205;8206;8235;8236;8237;8653;8654;8655;8656;8657;8658;8659;8660;8661;8662;9522;9523;9524;9525;9526;9527;9528;9529;9546;9547;9548…	2096;2097;2098;2099;3965;3966;3967;3968;3969;3970;3971;3972;3973;4005;4006;4430;4431;4432;4526;4530;4531;4532;4533;4534;4535;4536;4537;4538;5357;5358;5359;5360;5361;5362;5363;5364;6046;6047;6048;6049;6271;6272;6273;6274;6275;6276;6277;6278;6279;6280;6281;6282;6283;6284;8750;8751;8752;8753;8754;8783;8784;8785;9253;9254;9255;9256;9257;9258;9259;9260;9261;9262;10162;10163;10164;10165;10166;10167;101…	2097;3969;4006;4431;4526;4533;5362;6048;6271;6277;6284;8752;8783;9256;9261;10167;10170;10189;10412;10778;10783;10812;12994;12999;14587;14594;14919;15258;16708;16710;16716;17306;17310;18289;18300;18542;20812;21706;22036;22721;22803;22915;22916;22955;23000;23249;23258;23685;23688;23708;23913;24387;24389;25793;26797;26836;26838;27695;28602;30162;30166;30517;30703;30895;32036;32637;34922;35243;35997;…		249;250;251;252;253;254;255;256;257;258;259;260;261;262;263;264;265;266;876		136;884;1081;1088;1089;1158;1285;1385;1765;1822;1962;1965;2043;2125;2138;2185;2224;2339;2357	Q9HCK8;Q9HCK8-2;A0A2R8Y840;A0A2R8Y4P3;A0A2R8Y808;A0A2R8YFT4;G3V2T9;G3V303	Q9HCK8;Q9HCK8-2;A0A2R8Y840
tr|Q6JHV3|Q6JHV3_HUMAN Ubiquitinyl hydrolase 1 OS=Homo sapiens OX=9606 GN=USP3 PE=1 SV=1;tr|H0YMI4|H0YMI4_HUMAN Ubiquitinyl hydrolase 1 OS=Homo sapiens OX=9606 GN=USP3 PE=1 SV=1;sp|Q9Y6I4|UBP3_HUMAN Ubiquitin carboxyl-terminal hydrolase 3 OS=Homo sapiens O	Ubiquitin carboxyl-terminal hydrolase;Ubiquitin carboxyl-terminal hydrolase 3	USP3	8.65395	8.65398	7.81512	5.4	41.8	50977000	20534000000	2124000	855580000	83740000	18859000000	5	131	10	28	28	28	2	28	2	28	2	28	41.8	41.8	41.8	56.648	498	498;503;520;431;443;476;126;133;106;132	323.31				779	831;1794;1795;2920;2921;3185;3962;4489;5627;7269;7363;7364;7504;7505;8885;8886;11127;11128;12587;12677;12961;14029;14030;15982;16825;16826;17256;17719	True;True;True;True;True;True;True;True;True;True;True;True;True;True;True;True;True;True;True;True;True;True;True;True;True;True;True;True	860;1867;1868;3037;3038;3316;4135;4679;5858;5859;7578;7679;7680;7829;7830;7831;9272;9273;11734;11735;11736;13272;13364;13663;14802;14803;16845;17716;17717;18163;18640	2411;5302;5303;5304;5305;5306;5307;5308;5309;5310;5311;5312;8554;8555;8556;8557;8558;8559;8560;9482;9483;9484;11918;11919;11920;11921;11922;11923;13412;13413;13414;16927;16928;16929;16930;16931;16932;16933;16934;16935;16936;16937;16938;22110;22111;22112;22113;22114;22115;22116;22117;22118;22376;22377;22378;22379;22380;22381;22382;22383;22818;22819;22820;22821;22822;22823;22824;22825;22826;22827;2…	2523;5672;5673;5674;5675;5676;5677;5678;5679;5680;5681;5682;5683;9149;9150;9151;9152;9153;9154;9155;9156;10111;10112;10113;10114;10115;12724;12725;12726;12727;12728;12729;14300;14301;14302;18092;18093;18094;18095;18096;18097;18098;18099;18100;18101;18102;18103;23766;23767;23768;23769;23770;23771;23772;23773;23774;23775;23776;23777;23778;24040;24041;24042;24043;24044;24045;24046;24047;24048;24522;…	2523;5678;5680;9155;9156;10113;12724;14302;18096;23772;24046;24047;24523;24531;29234;29237;37009;37019;41775;42073;43074;46626;46632;53850;56490;56498;57950;59400	102;103;104	271;272	113;123;492	243;415	Q6JHV3;H0YMI4;Q9Y6I4;H0YLB7;H0YKU8;Q9Y6I4-2;H0YL81;H0YLG0;H0YM72;H0YMP6	Q6JHV3;H0YMI4;Q9Y6I4;H0YLB7;H0YKU8;Q9Y6I4-2
sp|P45974|UBP5_HUMAN Ubiquitin carboxyl-terminal hydrolase 5 OS=Homo sapiens OX=9606 GN=USP5 PE=1 SV=2;sp|P45974-2|UBP5_HUMAN Isoform Short of Ubiquitin carboxyl-terminal hydrolase 5 OS=Homo sapiens OX=9606 GN=USP5	Ubiquitin carboxyl-terminal hydrolase 5	USP5	#NUM!	#NUM!	#NUM!	0	52.9	0	18614000000	0	477280000	0	17709000000	0	212	3	43	43	41	0	43	0	43	0	41	52.9	52.9	51.7	95.785	858	858;835;137	323.31				1407	367;368;1640;1993;1994;2172;2386;2753;3502;3616;3759;3760;4400;5475;6134;6175;7045;7289;7458;7630;7805;7806;8390;8391;8467;10150;11754;12283;12791;12913;12924;12925;14163;14665;15288;15461;15988;17013;17186;17506;17507;17947;17955	True;True;True;True;True;True;True;True;True;True;True;True;True;True;True;True;True;True;True;True;True;True;True;True;True;True;True;True;True;True;True;True;True;True;True;True;True;True;True;True;True;True;True	387;388;1705;1706;2073;2074;2255;2482;2862;3656;3775;3923;3924;4588;5698;6389;6432;6433;7331;7599;7778;7779;7959;7960;8140;8141;8748;8749;8828;8829;10585;10586;12393;12947;12948;13485;13615;13626;13627;14946;15462;15463;15464;16114;16115;16116;16296;16851;16852;16853;17912;18092;18419;18420;18882;18890	1161;1162;1163;1164;4830;4831;4832;4833;4834;4835;4836;4837;4838;4839;5865;5866;5867;5868;5869;5870;6374;6375;6376;7023;7024;7025;7026;7027;7028;8062;8063;8064;10543;10855;10856;10857;11287;11288;11289;11290;11291;11292;11293;11294;11295;11296;13204;13205;13206;16465;16466;16467;16468;18487;18488;18489;18490;18491;18492;18608;18609;18610;18611;18612;18613;18614;18615;18616;18617;18618;21324;21325…	1241;1242;1243;1244;5183;5184;5185;5186;5187;5188;5189;5190;5191;5192;6258;6259;6260;6261;6262;6263;6264;6265;6790;6791;6792;7472;7473;7474;7475;7476;7477;8596;8597;8598;8599;8600;8601;8602;8603;11280;11601;11602;11603;12052;12053;12054;12055;12056;12057;12058;12059;12060;12061;12062;12063;12064;14085;14086;14087;14088;17605;17606;17607;17608;19753;19754;19755;19756;19757;19758;19759;19876;19877;…	1241;1242;5188;6259;6265;6791;7476;8597;11280;11602;12058;12064;14085;17606;19758;19884;22920;23849;24350;25161;25803;25805;27618;27621;27830;33194;39157;40781;42448;42905;42935;42940;47129;49118;51280;51867;53867;57164;57735;58763;58771;60090;60111	170;171;172;173;174;175	519;520;521;522;523;524;525;526;527;528	163;318;357;360;499;793	266;283;293;300;446;487;493;517;593;772	P45974;P45974-2;F5H571	P45974;P45974-2
sp|Q02930|CREB5_HUMAN Cyclic AMP-responsive element-binding protein 5 OS=Homo sapiens OX=9606 GN=CREB5 PE=1 SV=3;sp|Q02930-2|CREB5_HUMAN Isoform 2 of Cyclic AMP-responsive element-binding protein 5 OS=Homo sapiens OX=9606 GN=CREB5;sp|Q02930-3|CREB5_HUMAN I	Cyclic AMP-responsive element-binding protein 5	CREB5	-1.01499	-1.01495	-2.15268	54.9	47.8	74890000000	37058000000	4160500000	2058800000	78450000000	17643000000	197	319	20	38	38	27	33	31	33	31	23	22	58.1	58.1	49.6	56.918	508	508;501;475;369;115;39;329;447;462;307;329;487;494;144;505;473;463;126;389;483	323.31				1594	115;333;334;1897;4108;4109;4247;4248;5726;7168;7169;7781;7782;8667;9326;10421;10422;10916;11080;11980;12126;12270;12343;12688;12763;12861;12862;12863;12906;12907;12908;14667;14672;17044;17045;17046;17162;17163	True;True;True;True;True;True;True;True;True;True;True;True;True;True;True;True;True;True;True;True;True;True;True;True;True;True;True;True;True;True;True;True;True;True;True;True;True;True	117;118;119;350;351;352;353;1974;1975;4283;4284;4428;4429;4430;4431;5964;5965;7458;7459;7460;7461;7462;7463;8115;8116;8117;9046;9047;9048;9735;9736;10922;10923;10924;11513;11683;11684;11685;12629;12781;12932;13014;13015;13016;13017;13376;13456;13559;13560;13561;13608;13609;13610;15466;15472;15473;17943;17944;17945;18067;18068;18069	313;314;315;316;317;318;319;320;321;322;323;324;325;326;327;328;329;330;331;332;333;334;335;336;337;1049;1050;1051;1052;1053;1054;1055;1056;1057;1058;1059;1060;1061;1062;1063;1064;1065;1066;1067;1068;1069;1070;1071;1072;1073;1074;5597;5598;12343;12344;12345;12346;12347;12348;12738;12739;12740;12741;12742;12743;12744;12745;12746;12747;12748;12749;12750;12751;12752;12753;12754;12755;12756;12757;127…	324;325;326;327;328;329;330;331;332;333;334;335;336;337;338;339;340;341;342;343;344;345;346;347;348;1127;1128;1129;1130;1131;1132;1133;1134;1135;1136;1137;1138;1139;1140;1141;1142;1143;1144;1145;1146;1147;1148;1149;1150;1151;1152;5984;5985;13168;13169;13170;13171;13172;13173;13580;13581;13582;13583;13584;13585;13586;13587;13588;13589;13590;13591;13592;13593;13594;13595;13596;13597;13598;13599;136…	329;1130;1151;5984;13170;13173;13583;13616;18486;23329;23396;25727;25730;28518;30691;34308;34310;36247;36825;39854;40313;40731;41026;42101;42348;42701;42704;42707;42884;42886;42895;49125;49149;57245;57252;57260;57637;57650	200;201	159;160;161;162;163;164;165;615;616;617;618;619;620;621;622;623;624;625;626;627;628;629;630	7;67	1;34;42;54;101;109;135;175;179;188;196;198;247;252;255;258;259;261;262;401;415;423;446	Q02930;Q02930-2;Q02930-3;Q02930-4;H9KVC5;H0YFV2;P15336-2;P15336-4;P17544-2;P17544-4;F5H629;P15336-5;P17544;P15336-8;P15336;P17544-3;K7ELQ4;P15336-6;B8ZZU6;P17544-6	Q02930;Q02930-2;Q02930-3;Q02930-4
sp|Q9NWF9-1|RN216_HUMAN Isoform 2 of E3 ubiquitin-protein ligase RNF216 OS=Homo sapiens OX=9606 GN=RNF216;sp|Q9NWF9|RN216_HUMAN E3 ubiquitin-protein ligase RNF216 OS=Homo sapiens OX=9606 GN=RNF216 PE=1 SV=3;sp|Q9NWF9-3|RN216_HUMAN Isoform 3 of E3 ubiquitin	E3 ubiquitin-protein ligase RNF216	RNF216	2.48101	2.48101	1.70348	26.7	35.1	3153200000	17604000000	65692000	366750000	4820000000	15698000000	40	153	4	50	50	50	27	50	27	50	27	50	35.1	35.1	35.1	105.88	923	923;866;488;326	323.31				2457	330;1042;1043;3003;3004;3249;3319;3493;3835;3836;4238;5303;5983;5984;6207;6208;6318;6319;6320;6391;7167;7182;7643;7644;7788;7789;9826;10319;10320;11701;12225;12226;12227;12265;12533;12645;12745;12746;14129;14130;15486;16548;16549;16596;16720;17227;17228;17355;17356;17445	True;True;True;True;True;True;True;True;True;True;True;True;True;True;True;True;True;True;True;True;True;True;True;True;True;True;True;True;True;True;True;True;True;True;True;True;True;True;True;True;True;True;True;True;True;True;True;True;True;True	347;1078;1079;1080;3126;3127;3381;3463;3647;4001;4002;4419;5521;6231;6232;6233;6465;6466;6467;6578;6579;6580;6581;6656;6657;7457;7480;7973;7974;8123;8124;10250;10798;10799;10800;10801;12337;12885;12886;12887;12888;12927;13214;13331;13437;13438;14909;14910;16322;16323;17428;17429;17476;17607;17608;18133;18134;18265;18266;18267;18358	1041;1042;1043;1044;3087;3088;3089;3090;3091;3092;3093;3094;3095;3096;3097;3098;8873;8874;8875;8876;8877;8878;8879;9679;9680;9943;9944;9945;9946;10521;10522;10523;10524;10525;10526;10527;11478;11479;11480;11481;11482;11483;11484;11485;11486;11487;12712;12713;12714;15980;15981;15982;15983;18064;18065;18066;18067;18068;18069;18070;18071;18072;18073;18696;18697;18698;18699;18700;18701;18702;18703;18…	1119;1120;1121;1122;3331;3332;3333;3334;3335;3336;3337;3338;3339;3340;3341;3342;3343;3344;3345;3346;3347;3348;9485;9486;9487;9488;9489;9490;9491;9492;9493;9494;10329;10330;10614;10615;10616;10617;11258;11259;11260;11261;11262;11263;11264;12255;12256;12257;12258;12259;12260;12261;12262;12263;12264;13548;13549;13550;17101;17102;17103;17104;19279;19280;19281;19282;19283;19284;19285;19286;19287;19288…	1120;3341;3346;9488;9494;10330;10615;11262;12256;12264;13550;17104;19283;19286;19980;19984;20299;20311;20321;20606;23276;23457;25199;25200;25754;25757;32288;33896;33903;38995;40597;40601;40604;40717;41631;41982;42294;42295;46987;46994;51981;55601;55607;55751;56160;57859;57860;58294;58295;58571	283;284;285;286;287;288;289;290;291;292	892;893;894;895;896;897	408;411;419;482;516;542;641;723;830;834	489;510;546;724;905;913	Q9NWF9-1;Q9NWF9;Q9NWF9-3;F8W6D1	Q9NWF9-1;Q9NWF9;Q9NWF9-3
sp|P04844|RPN2_HUMAN Dolichyl-diphosphooligosaccharide--protein glycosyltransferase subunit 2 OS=Homo sapiens OX=9606 GN=RPN2 PE=1 SV=3;sp|P04844-2|RPN2_HUMAN Isoform 2 of Dolichyl-diphosphooligosaccharide--protein glycosyltransferase subunit 2 OS=Homo sap	Dolichyl-diphosphooligosaccharide--protein glycosyltransferase subunit 2	RPN2	0.706124	0.706046	0.187876	60.5	50.4	10619000000	17324000000	461710000	753200000	13409000000	15274000000	90	149	7	35	35	35	31	28	31	28	31	28	62.4	62.4	62.4	69.283	631	631;615;344;166;162;138;147	323.31				1158	843;1460;1461;2202;2775;3828;4363;4364;5470;6923;7574;8020;8512;8513;8670;8671;9172;9173;9516;9517;9664;10448;10449;10928;11641;11847;11848;13570;14874;14875;14876;15479;16372;17618;17623	True;True;True;True;True;True;True;True;True;True;True;True;True;True;True;True;True;True;True;True;True;True;True;True;True;True;True;True;True;True;True;True;True;True;True	873;1521;1522;2286;2884;3993;4549;4550;5693;7208;7901;8363;8878;8879;9051;9052;9564;9565;9566;9567;9934;9935;10083;10958;10959;10960;11525;12273;12489;12490;14314;15683;15684;15685;16314;16315;17249;18538;18543	2453;2454;4327;4328;4329;4330;4331;4332;4333;4334;4335;6466;6467;6468;6469;6470;6471;8118;8119;8120;8121;11453;11454;11455;13093;13094;13095;13096;13097;13098;13099;13100;13101;13102;13103;13104;13105;13106;13107;13108;13109;16451;16452;16453;20951;20952;20953;20954;20955;20956;20957;20958;23087;23088;23089;23090;23091;23092;23093;23094;23095;23096;23097;23098;24515;25941;25942;25943;26443;26444;…	2568;2569;2570;4649;4650;4651;4652;4653;4654;4655;4656;4657;6882;6883;6884;6885;6886;6887;8663;8664;8665;8666;12228;12229;12230;13968;13969;13970;13971;13972;13973;13974;13975;13976;13977;13978;13979;13980;13981;13982;13983;13984;13985;13986;17591;17592;17593;22522;22523;22524;22525;22526;22527;22528;22529;24943;24944;24945;24946;24947;24948;24949;24950;24951;24952;24953;24954;24955;24956;24957;2…	2569;4650;4653;6886;8664;12228;13973;13983;17592;22524;24956;26468;28013;28015;28530;28532;30183;30187;31318;31327;31794;34437;34445;36275;38763;39397;39400;45092;49748;49751;49766;51953;55049;59098;59110		401;402;403		219;337;620	P04844;P04844-2;Q5JYR7;Q5JYR4;F2Z3K5;Q5JYR3;H0Y5M1	P04844;P04844-2
;sp|P13645|K1C10_HUMAN Keratin, type I cytoskeletal 10 OS=Homo sapiens OX=9606 GN=KRT10 PE=1 SV=6	Keratin, type I cytoskeletal 10	KRT10	-0.0140844	-0.0140898	-0.571245	45.9	47	16881000000	16717000000	649260000	642950000	21354000000	14372000000	107	166	9	39	38	27	30	36	30	35	24	25	47	47	37.8	59.51	593	593;584;486;464;464;450;459;450;459	323.31			+	482	265;937;1837;3225;3226;5411;6392;6807;7204;7576;7813;7975;7980;8164;8767;10996;11418;11621;11622;11634;12364;12382;12772;12898;13172;13173;13591;13592;13593;13743;14091;14092;14093;14939;16416;16417;16993;16994;17494	True;True;True;True;True;True;True;True;True;True;True;False;True;True;True;True;True;True;True;True;True;True;True;True;True;True;True;True;True;True;True;True;True;True;True;True;True;True;True	279;280;970;1913;3357;3358;5633;6658;7089;7507;7903;8148;8317;8322;8516;9152;11593;11594;12040;12251;12252;12264;12265;12266;13038;13056;13466;13599;13892;13893;14335;14336;14337;14498;14870;14871;14872;15748;17293;17294;17295;17890;17891;17892;17893;18407	850;851;852;853;854;855;856;857;2790;2791;2792;2793;2794;2795;2796;5431;5432;5433;5434;5435;9606;9607;9608;9609;9610;9611;9612;9613;9614;9615;9616;16287;16288;16289;16290;16291;16292;19289;19290;19291;19292;20627;20628;20629;20630;20631;20632;20633;20634;20635;20636;21918;23100;23906;23907;23908;23909;23910;23911;24387;24388;24417;24418;24419;24420;24421;24422;24423;24897;24898;24899;26768;26769;…	918;919;920;921;922;923;924;925;3023;3024;3025;3026;3027;3028;3029;3030;3031;3032;3033;3034;5807;5808;5809;5810;5811;10254;10255;10256;10257;10258;10259;10260;10261;10262;10263;10264;17417;17418;17419;17420;17421;17422;17423;20612;20613;20614;20615;22178;22179;22180;22181;22182;22183;22184;22185;22186;22187;23553;24959;25833;25834;25835;25836;25837;25838;25839;26337;26338;26368;26369;26370;26371;…	919;3023;5810;10257;10262;17420;20615;22185;23553;24959;25838;26338;26370;26866;28892;36496;37958;38647;38661;38733;41083;41137;42385;42844;43780;43783;45179;45185;45194;45676;46870;46879;46883;49997;55182;55189;57091;57100;58720		174;186;187;188;189		150;271;291;306;321	CON__P13645;P13645;CON__Q7Z3Y7;Q7Z3Y7;CON__Q148H6;CON__Q7Z3Z0;CON__Q7Z3Y8;Q7Z3Z0;Q7Z3Y8	CON__P13645;P13645
tr|F5GZS6|F5GZS6_HUMAN 4F2 cell-surface antigen heavy chain OS=Homo sapiens OX=9606 GN=SLC3A2 PE=1 SV=1;tr|J3KPF3|J3KPF3_HUMAN 4F2 cell-surface antigen heavy chain OS=Homo sapiens OX=9606 GN=SLC3A2 PE=1 SV=1;sp|P08195-3|4F2_HUMAN Isoform 3 of 4F2 cell-surf	4F2 cell-surface antigen heavy chain	SLC3A2	0.488848	0.488807	0.177349	39.7	48.2	10649000000	14944000000	367210000	515300000	12599000000	14247000000	69	131	9	32	32	1	22	30	22	30	1	1	49.2	49.2	2.8	64.872	599	599;631;568;630;661;247;175;47;122	323.31				653	271;272;1913;2722;3184;3557;4402;4706;5189;5190;5325;5326;5355;6164;6165;6425;8086;8169;8725;9129;10271;11419;11420;11421;13750;15806;15838;16304;16305;16349;16365;17408	True;True;True;True;True;True;True;True;True;True;True;True;True;True;True;True;True;True;True;True;True;True;True;True;True;True;True;True;True;True;True;True	286;287;1991;2831;3315;3713;4590;4906;5401;5402;5544;5545;5575;6421;6422;6693;8436;8521;9108;9521;10740;10741;12041;12042;12043;14505;16665;16697;17180;17181;17226;17242;18321	875;876;877;878;879;880;881;882;883;884;885;5644;5645;5646;5647;7984;7985;7986;7987;7988;7989;9480;9481;10690;10691;10692;13208;13209;13210;13211;13212;13213;13214;13215;13216;13217;14116;14117;14118;15599;15600;15601;15602;15603;15604;15605;15606;15607;15608;15609;15610;15611;16052;16053;16054;16055;16056;16057;16058;16059;16060;16061;16062;16063;16064;16065;16128;16129;16130;16131;16132;16133;1…	943;944;945;946;947;948;949;950;951;952;953;6031;6032;6033;6034;8503;8504;8505;8506;8507;8508;10109;10110;11433;11434;11435;14090;14091;14092;14093;14094;14095;14096;14097;14098;14099;15070;15071;15072;16674;16675;16676;16677;16678;16679;16680;16681;16682;16683;16684;16685;16686;17174;17175;17176;17177;17178;17179;17180;17181;17182;17183;17184;17185;17186;17187;17188;17253;17254;17255;17256;17257…	943;953;6034;8507;10109;11434;14099;15072;16681;16686;17178;17187;17257;19855;19856;20730;26668;26873;28704;30028;33747;37963;37969;37976;45691;53210;53347;54859;54861;54975;55020;58474		226		1	F5GZS6;J3KPF3;P08195-3;P08195;P08195-4;H0YFS2;F5GZI0;F5GZR9;H0YFX4	F5GZS6;J3KPF3;P08195-3;P08195;P08195-4
sp|Q6ZNA4|RN111_HUMAN E3 ubiquitin-protein ligase Arkadia OS=Homo sapiens OX=9606 GN=RNF111 PE=1 SV=3;sp|Q6ZNA4-3|RN111_HUMAN Isoform 3 of E3 ubiquitin-protein ligase Arkadia OS=Homo sapiens OX=9606 GN=RNF111;sp|Q6ZNA4-2|RN111_HUMAN Isoform 2 of E3 ubiquit	E3 ubiquitin-protein ligase Arkadia	RNF111	0.234905	0.234926	-0.356504	33	25.5	15105000000	17776000000	487260000	573430000	17936000000	14009000000	109	139	7	31	31	31	29	24	29	24	29	24	34.7	34.7	34.7	108.86	994	994;1003;986;995;131;128;190	323.31				1919	3307;4624;4977;5227;6928;6929;7203;7775;8494;8517;10381;11810;11811;12237;12883;13026;13169;13170;13281;13468;14089;14112;14728;15411;15591;15941;16187;17022;17023;17652;17653	True;True;True;True;True;True;True;True;True;True;True;True;True;True;True;True;True;True;True;True;True;True;True;True;True;True;True;True;True;True;True	3450;4821;5183;5443;7213;7214;7506;8109;8857;8858;8859;8883;8884;10875;10876;12450;12451;12899;13583;13584;13730;13889;13890;14013;14210;14868;14891;15532;15533;16246;16436;16437;16801;17057;17921;17922;18573;18574	9909;9910;9911;9912;9913;9914;13863;13864;14941;14942;14943;14944;14945;14946;14947;14948;14949;14950;14951;15724;15725;15726;15727;15728;15729;15730;15731;15732;15733;15734;15735;20967;20968;20969;20970;20971;20972;20973;20974;20975;20976;20977;20978;21917;23762;23763;23764;25851;25852;25853;25854;25855;25856;25857;25858;25859;25860;25861;25862;25863;25864;25865;25866;25867;25868;25869;25870;258…	10577;10578;10579;10580;10581;10582;14801;14802;15957;15958;15959;15960;15961;15962;15963;15964;15965;15966;15967;15968;15969;16819;16820;16821;16822;16823;16824;16825;16826;16827;16828;16829;16830;22538;22539;22540;22541;22542;22543;22544;22545;22546;22547;22548;22549;22550;22551;22552;22553;22554;23552;25681;25682;25683;27919;27920;27921;27922;27923;27924;27925;27926;27927;27928;27929;27930;279…	10577;14801;15962;16825;22540;22548;23552;25683;27951;28024;34185;39285;39288;40640;42803;43254;43772;43774;44183;44815;46851;46935;49366;51707;52361;53692;54454;57183;57188;59199;59206	233;234	754;755;756;757;758;759	941;978	197;474;751;779;850;854	Q6ZNA4;Q6ZNA4-3;Q6ZNA4-2;Q6ZNA4-4;H0YKS2;H0YKK5;H0YLK9	Q6ZNA4;Q6ZNA4-3;Q6ZNA4-2;Q6ZNA4-4
tr|A0A087WWK8|A0A087WWK8_HUMAN IQ motif and SEC7 domain-containing protein 1 OS=Homo sapiens OX=9606 GN=IQSEC1 PE=1 SV=1;tr|A0A3B3IRZ4|A0A3B3IRZ4_HUMAN IQ motif and SEC7 domain-containing protein 1 OS=Homo sapiens OX=9606 GN=IQSEC1 PE=1 SV=1;tr|A0A2R8Y7T6|	IQ motif and SEC7 domain-containing protein 1	IQSEC1	1.48854	1.48852	0.623595	38.1	41.1	5784300000	16231000000	111240000	312140000	8484400000	13072000000	105	237	11	62	62	55	45	57	45	57	40	50	43.7	43.7	40.6	124.48	1114	1114;1222;964;963;841;810;814;779;1038;759;1182	323.31				57	209;628;629;862;1382;2415;2953;3153;3154;3271;3437;4385;4386;4387;4388;4807;5519;5520;5561;5821;6196;6197;6198;7058;7288;7415;7564;7621;8245;8563;9425;9426;9581;9582;9855;10436;10613;10614;11260;11261;11529;11530;11753;12219;12661;12872;12983;12984;12985;13723;13791;13818;13819;13820;13946;14141;14992;15298;16245;16488;16489;16781	True;True;True;True;True;True;True;True;True;True;True;True;True;True;True;True;True;True;True;True;True;True;True;True;True;True;True;True;True;True;True;True;True;True;True;True;True;True;True;True;True;True;True;True;True;True;True;True;True;True;True;True;True;True;True;True;True;True;True;True;True;True	215;654;655;893;1440;1441;2511;3075;3283;3284;3407;3408;3409;3588;3589;4572;4573;4574;4575;4576;5008;5744;5745;5746;5790;6065;6454;6455;6456;7344;7598;7734;7891;7950;8598;8932;9839;9840;10000;10001;10279;10942;10943;11163;11164;11165;11875;11876;12157;12158;12392;12877;12878;13348;13571;13572;13685;13686;13687;14477;14548;14576;14577;14578;14579;14716;14922;14923;15801;16127;17117;17367;17368;176…	588;1867;1868;1869;1870;1871;1872;1873;2574;2575;2576;4092;4093;4094;4095;4096;4097;4098;4099;7114;7115;7116;7117;8706;8707;8708;8709;8710;8711;9388;9389;9390;9391;9392;9393;9394;9395;9396;9397;9398;9761;9762;9763;9764;9765;9766;9767;9768;9769;10341;10342;10343;10344;13167;13168;13169;13170;13171;13172;13173;13174;13175;13176;13177;13178;13179;13180;14408;14409;14410;14411;14412;14413;14414;14415…	627;1961;1962;1963;1964;1965;1966;1967;2804;2805;2806;4403;4404;4405;4406;4407;4408;4409;4410;4411;4412;4413;7581;7582;7583;7584;9306;9307;9308;9309;9310;9311;10016;10017;10018;10019;10020;10021;10022;10023;10024;10025;10026;10426;10427;10428;10429;10430;10431;10432;10433;10434;11031;11032;11033;11034;14047;14048;14049;14050;14051;14052;14053;14054;14055;14056;14057;14058;14059;14060;15380;15381;…	627;1962;1967;2805;4411;7582;9311;10017;10025;10431;11033;14052;14056;14058;14060;15392;17728;17739;17871;18821;19941;19951;19952;22959;23847;24221;24925;25133;27091;28172;31034;31035;31530;31540;32387;34385;35087;35093;37451;37456;38348;38350;39155;40572;42034;42755;43133;43134;43137;45608;45821;45914;45921;45927;46386;47041;50175;51323;54623;55385;55388;56372		20;21;22;23;24;25;26;27;28		109;163;274;559;663;685;687;853;944	A0A087WWK8;A0A3B3IRZ4;A0A2R8Y7T6;Q6DN90;Q6DN90-2;A0A3B3IU98;A0A0C4DGT3;A0A2R8Y695;A0A0G2JLG2;Q9UPP2-2;Q9UPP2	A0A087WWK8;A0A3B3IRZ4;A0A2R8Y7T6;Q6DN90;Q6DN90-2;A0A3B3IU98;A0A0C4DGT3;A0A2R8Y695
sp|Q71UI9|H2AV_HUMAN Histone H2A.V OS=Homo sapiens OX=9606 GN=H2AFV PE=1 SV=3;sp|P0C0S5|H2AZ_HUMAN Histone H2A.Z OS=Homo sapiens OX=9606 GN=H2AFZ PE=1 SV=2;sp|Q71UI9-4|H2AV_HUMAN Isoform 4 of Histone H2A.V OS=Homo sapiens OX=9606 GN=H2AFV;tr|C9J0D1|C9J0D1_	Histone H2A.V;Histone H2A.Z;Histone H2A	H2AFV;H2AFZ	-1.04511	-1.04504	-0.938729	56.2	43	20984000000	10169000000	4196800000	2033900000	23119000000	12061000000	51	27	7	9	9	7	9	5	9	5	7	3	56.2	56.2	49.2	13.509	128	128;128;102;122;90;114;76	323.31				1202	658;1561;4655;4656;5761;5762;5763;16138;16139	True;True;True;True;True;True;True;True;True	684;1624;4854;4855;6002;6003;6004;17007;17008	1939;1940;1941;1942;1943;1944;4613;4614;4615;13965;13966;13967;13968;13969;13970;13971;17383;17384;17385;17386;17387;17388;17389;17390;17391;17392;17393;17394;17395;17396;17397;17398;17399;17400;17401;17402;17403;17404;17405;17406;17407;17408;17409;17410;17411;17412;17413;17414;17415;17416;17417;17418;17419;17420;17421;17422;17423;17424;17425;17426;17427;17428;50461;50462;50463;50464;50465;50466;…	2034;2035;2036;2037;2038;2039;2040;2041;2042;4948;4949;4950;14912;14913;14914;14915;14916;14917;14918;18579;18580;18581;18582;18583;18584;18585;18586;18587;18588;18589;18590;18591;18592;18593;18594;18595;18596;18597;18598;18599;18600;18601;18602;18603;18604;18605;18606;18607;18608;18609;18610;18611;18612;18613;18614;18615;18616;18617;18618;18619;18620;18621;18622;18623;18624;18625;18626;18627;543…	2040;4948;14912;14918;18581;18609;18624;54328;54334					Q71UI9;P0C0S5;Q71UI9-4;C9J0D1;Q71UI9-3;Q71UI9-2;C9J386	Q71UI9;P0C0S5;Q71UI9-4;C9J0D1;Q71UI9-3;Q71UI9-2
sp|Q13501|SQSTM_HUMAN Sequestosome-1 OS=Homo sapiens OX=9606 GN=SQSTM1 PE=1 SV=1;sp|Q13501-2|SQSTM_HUMAN Isoform 2 of Sequestosome-1 OS=Homo sapiens OX=9606 GN=SQSTM1;tr|E7EMC7|E7EMC7_HUMAN Sequestosome-1 OS=Homo sapiens OX=9606 GN=SQSTM1 PE=1 SV=1	Sequestosome-1	SQSTM1	7.67318	7.67311	7.44798	9.1	60.2	59709000	12187000000	2985500	609330000	68307000	11927000000	5	109	8	16	16	16	3	16	3	16	3	16	60.2	60.2	60.2	47.687	440	440;356;378;167;140;190;69;73	323.31				1671	615;1803;2037;2587;3556;5692;7869;8569;9831;11591;11650;11651;11702;14121;15790;15791	True;True;True;True;True;True;True;True;True;True;True;True;True;True;True;True	641;1876;1877;2117;2692;3712;5927;8204;8938;8939;8940;10255;12219;12220;12282;12283;12284;12338;14901;16648;16649	1814;1815;1816;1817;1818;5333;5334;5335;5336;5337;5338;5339;5340;5341;5999;6000;7612;7613;7614;7615;7616;7617;7618;7619;7620;7621;7622;7623;7624;10687;10688;10689;17158;17159;17160;17161;17162;17163;24064;24065;24066;24067;24068;24069;26116;26117;26118;26119;26120;26121;26122;26123;26124;26125;29968;29969;29970;29971;29972;35768;35769;35770;35771;35772;35773;35774;35775;35776;35777;36025;36026;36…	1906;1907;1908;1909;1910;1911;5705;5706;5707;5708;5709;5710;5711;5712;5713;5714;5715;6400;6401;8102;8103;8104;8105;8106;8107;8108;8109;8110;8111;8112;8113;8114;8115;8116;8117;8118;8119;8120;8121;8122;8123;8124;8125;8126;8127;8128;8129;8130;8131;8132;11430;11431;11432;18348;18349;18350;18351;18352;18353;18354;18355;18356;25994;25995;25996;25997;25998;25999;26000;26001;26002;26003;26004;26005;26006…	1906;5710;6400;8131;11432;18356;26002;28198;32315;38520;38800;38810;39005;46967;53137;53141	210;211;212	659;660	13;264;435	401;404	Q13501;Q13501-2;E7EMC7;E9PFW8;C9JRJ8;E3W990;D6RBF1;C9J6J8	Q13501;Q13501-2;E7EMC7
sp|P35527|K1C9_HUMAN Keratin, type I cytoskeletal 9 OS=Homo sapiens OX=9606 GN=KRT9 PE=1 SV=3;;tr|K7EQQ3|K7EQQ3_HUMAN Keratin, type I cytoskeletal 9 OS=Homo sapiens OX=9606 GN=KRT9 PE=1 SV=1	Keratin, type I cytoskeletal 9	KRT9	-1.4985	-1.4985	-1.5115	65.8	61.5	30261000000	10710000000	1163900000	411930000	31986000000	11219000000	139	175	3	45	45	44	40	35	40	35	40	34	65.8	65.8	65.8	62.064	623	623;623;390	323.31			+	1364	2053;2054;2950;3832;4367;4369;4840;4898;4899;5702;5703;6393;6734;6735;7214;7975;7976;7977;7978;7979;8142;10651;10720;11001;11002;11461;11676;11677;11877;11900;11951;11952;12443;12444;13064;13065;13371;14315;15161;15162;15185;16759;16760;16761;16762	True;True;True;True;True;True;True;True;True;True;True;True;True;True;True;True;True;True;True;True;True;True;True;True;True;True;True;True;True;True;True;True;True;True;True;True;True;True;True;True;True;True;True;True;True	2135;2136;3071;3997;3998;4553;4556;5042;5102;5103;5937;5938;6659;6660;7013;7014;7518;8317;8318;8319;8320;8321;8493;11211;11212;11291;11292;11599;11600;11601;12086;12309;12310;12520;12543;12599;12600;13118;13119;13120;13121;13122;13770;13771;13772;13773;13774;14108;15102;15103;15979;15980;16003;16004;17648;17649;17650;17651	6056;6057;6058;6059;6060;6061;6062;6063;6064;6065;6066;8690;8691;8692;8693;8694;8695;8696;8697;8698;8699;11468;11469;11470;11471;11472;11473;11474;13115;13120;13121;14521;14522;14523;14524;14525;14526;14527;14528;14529;14530;14531;14712;14713;14714;14715;14716;14717;14718;14719;14720;17188;17189;17190;17191;17192;17193;17194;17195;17196;17197;17198;17199;17200;17201;17202;17203;17204;19293;19294;…	6463;6464;6465;6466;6467;6468;6469;6470;6471;6472;6473;9290;9291;9292;9293;9294;9295;9296;9297;9298;9299;12245;12246;12247;12248;12249;12250;12251;13992;13997;13998;15506;15507;15508;15509;15510;15511;15512;15513;15514;15515;15516;15723;15724;15725;15726;15727;15728;15729;15730;15731;18381;18382;18383;18384;18385;18386;18387;18388;18389;18390;18391;18392;18393;18394;18395;18396;18397;20616;20617;…	6466;6472;9297;12246;13992;13998;15509;15725;15728;18391;18393;20634;21972;21973;23595;26338;26344;26347;26361;26366;26812;35238;35513;36513;36525;38132;38900;38902;39497;39553;39763;39764;41323;41328;43374;43396;44437;47647;50808;50811;50877;56289;56290;56296;56299		494;495;496;497;498;499;500;501;502		157;234;245;269;276;286;296;326;445	P35527;CON__P35527;K7EQQ3	P35527;CON__P35527;K7EQQ3
sp|P05556|ITB1_HUMAN Integrin beta-1 OS=Homo sapiens OX=9606 GN=ITGB1 PE=1 SV=2;sp|P05556-2|ITB1_HUMAN Isoform 2 of Integrin beta-1 OS=Homo sapiens OX=9606 GN=ITGB1;sp|P05556-5|ITB1_HUMAN Isoform 5 of Integrin beta-1 OS=Homo sapiens OX=9606 GN=ITGB1;sp|P05	Integrin beta-1	ITGB1	0.478236	0.478234	0.268492	22.7	21.9	8037100000	11196000000	236390000	329300000	8962700000	10796000000	59	101	15	18	18	18	17	15	17	15	17	15	23.8	23.8	23.8	88.414	798	798;789;801;819;825;163;98;136;143;152;124;31;89;104;108	323.31				1168	1819;2307;4042;4716;8735;9138;9578;9623;9629;9630;11615;12523;13024;13353;13716;13717;15667;17246	True;True;True;True;True;True;True;True;True;True;True;True;True;True;True;True;True;True	1893;2398;4216;4916;9119;9530;9997;10042;10048;10049;12245;13201;13202;13728;14090;14463;14464;14465;14466;14467;14468;16516;16517;18152	5380;5381;6782;6783;6784;6785;12133;14148;14149;14150;14151;14152;26646;26647;26648;26649;26650;26651;26652;26653;26654;26655;26656;26657;27882;27883;27884;27885;27886;27887;27888;27889;27890;27891;27892;27893;27894;27895;27896;29234;29235;29236;29237;29238;29239;29362;29363;29364;29365;29385;29386;29387;29388;29389;29390;29391;29392;29393;29394;29395;29396;29397;35859;35860;35861;35862;35863;358…	5754;5755;7208;7209;7210;7211;12945;15113;15114;15115;15116;15117;28739;28740;28741;28742;28743;28744;28745;28746;28747;28748;28749;28750;28751;28752;28753;28754;28755;28756;28757;30054;30055;30056;30057;30058;30059;30060;30061;30062;30063;30064;30065;30066;30067;30068;30069;30070;30071;30072;30073;30074;31509;31510;31511;31512;31513;31514;31515;31516;31652;31653;31654;31655;31675;31676;31677;316…	5755;7211;12945;15117;28747;30073;31512;31655;31681;31687;38624;41572;43250;44391;45571;45581;52630;57913		404;405;406;407;408		149;155;170;173;193	P05556;P05556-2;P05556-5;P05556-4;P05556-3;E7EQW5;C9JPK5;Q5T3E6;E9PLR6;E7EUI6;E7ERX5;C9JJP8;Q5T3E5;E9PQJ2;H7C4N8	P05556;P05556-2;P05556-5;P05556-4;P05556-3
sp|Q9NS91|RAD18_HUMAN E3 ubiquitin-protein ligase RAD18 OS=Homo sapiens OX=9606 GN=RAD18 PE=1 SV=2;tr|F8WE49|F8WE49_HUMAN E3 ubiquitin-protein ligase RAD18 OS=Homo sapiens OX=9606 GN=RAD18 PE=1 SV=1	E3 ubiquitin-protein ligase RAD18	RAD18	4.37044	4.37038	3.17717	26.9	46.1	579000000	11976000000	18678000	386320000	1191000000	10773000000	18	110	6	31	31	31	12	31	12	31	12	31	46.1	46.1	46.1	56.222	495	495;310;91;53;126;131	323.31				2430	68;2354;3276;3277;4352;5731;6448;8089;8696;8697;9176;9233;9234;10218;10219;10650;10880;11003;11004;12783;13155;14366;14367;14940;15450;15711;15727;15728;15729;17208;17351	True;True;True;True;True;True;True;True;True;True;True;True;True;True;True;True;True;True;True;True;True;True;True;True;True;True;True;True;True;True;True	70;2448;2449;3414;3415;3416;3417;4538;5970;6716;8439;9077;9078;9570;9571;9636;9637;9638;9639;10667;10668;10669;11209;11210;11476;11602;11603;13477;13874;15154;15155;15156;15749;16285;16567;16583;16584;16585;18114;18261	192;193;194;6911;6912;6913;6914;6915;6916;6917;6918;6919;6920;6921;6922;6923;9776;9777;9778;9779;9780;9781;9782;9783;9784;9785;9786;9787;9788;9789;9790;9791;9792;9793;9794;13070;17300;17301;17302;19476;19477;19478;19479;19480;19481;24713;24714;24715;26519;26520;26521;26522;26523;26524;26525;26526;26527;26528;28020;28021;28022;28023;28024;28025;28026;28180;28181;28182;28183;28184;28185;28186;28187…	197;198;199;7345;7346;7347;7348;7349;7350;7351;7352;7353;7354;7355;7356;7357;7358;10441;10442;10443;10444;10445;10446;10447;10448;10449;10450;10451;10452;10453;10454;10455;10456;10457;10458;10459;10460;13943;18495;18496;18497;20802;20803;20804;20805;20806;20807;26675;26676;26677;28610;28611;28612;28613;28614;28615;28616;28617;28618;28619;28620;30200;30201;30202;30203;30204;30205;30206;30360;30361…	199;7350;10442;10452;13943;18497;20807;26677;28612;28620;30203;30361;30365;33456;33459;35231;36141;36533;36541;42418;43739;47803;47812;50000;51836;52899;52961;52972;52973;57795;58282	277;278;279;280	883;884;885;886	186;318;328;333	1;133;141;324	Q9NS91;F8WE49;C9J0Q4;F8WAZ7;F8WFA6;H7C3I2	Q9NS91;F8WE49
sp|A0AVT1|UBA6_HUMAN Ubiquitin-like modifier-activating enzyme 6 OS=Homo sapiens OX=9606 GN=UBA6 PE=1 SV=1;sp|A0AVT1-2|UBA6_HUMAN Isoform 2 of Ubiquitin-like modifier-activating enzyme 6 OS=Homo sapiens OX=9606 GN=UBA6	Ubiquitin-like modifier-activating enzyme 6	UBA6	#NUM!	#NUM!	#NUM!	0	41.1	0	11415000000	0	203850000	0	10696000000	0	184	6	46	46	46	0	46	0	46	0	46	41.1	41.1	41.1	117.97	1052	1052;578;271;340;389;88	323.31				308	783;784;2011;2108;2724;2725;3033;3076;3804;3994;4492;5215;6346;6673;6741;7595;7596;7807;8203;8675;10527;10797;10798;10821;10822;10917;11233;11283;11829;11830;12350;12804;13070;13280;13466;14531;15640;16969;17117;17118;17119;17394;17571;17957;17968;18000	True;True;True;True;True;True;True;True;True;True;True;True;True;True;True;True;True;True;True;True;True;True;True;True;True;True;True;True;True;True;True;True;True;True;True;True;True;True;True;True;True;True;True;True;True;True	811;812;2091;2191;2833;2834;3156;3204;3969;4167;4682;5428;5429;6607;6951;7020;7924;7925;8142;8556;9056;11056;11057;11385;11386;11387;11388;11413;11414;11514;11845;11898;12471;12472;13024;13499;13779;14012;14208;15325;16488;17866;18018;18019;18020;18307;18488;18489;18892;18903;18904;18936	2274;2275;2276;2277;5936;5937;6210;6211;6212;7991;7992;8969;8970;9167;11401;11402;11403;11995;11996;11997;11998;13417;13418;13419;15667;15668;15669;15670;15671;15672;19105;19106;19107;19108;19109;20195;20439;20440;20441;23178;23179;23180;23181;23182;23183;23184;23185;23882;23883;23884;24994;24995;26461;26462;26463;26464;32240;32241;32242;32243;32244;32245;33253;33254;33255;33256;33257;33258;33259…	2384;2385;2386;2387;6337;6338;6619;6620;6621;8510;8511;9586;9587;9792;12171;12172;12173;12801;12802;12803;12804;14305;14306;14307;16746;16747;16748;16749;16750;16751;20406;20407;20408;20409;20410;21573;21987;21988;21989;25044;25045;25046;25047;25048;25049;25050;25051;25052;25053;25054;25807;25808;25809;25810;26964;26965;28547;28548;28549;28550;34739;34740;34741;34742;34743;34744;35844;35845;35846…	2384;2387;6338;6620;8510;8511;9586;9792;12172;12801;14306;16750;20408;21573;21989;25050;25053;25810;26964;28549;34741;35845;35855;35949;35950;36250;37364;37523;39344;39345;41044;42503;43413;44165;44807;48723;52543;56972;57467;57470;57477;58417;58951;60116;60152;60240	42	124;125;126;127;128;129	830	56;492;872;985;992;998	A0AVT1;A0AVT1-2;H0Y8S8;A0AVT1-4;A0AVT1-3;H0Y9U5	A0AVT1;A0AVT1-2
tr|A0A0G2JIW1|A0A0G2JIW1_HUMAN Heat shock 70 kDa protein 1B OS=Homo sapiens OX=9606 GN=HSPA1B PE=1 SV=1;sp|P0DMV9|HS71B_HUMAN Heat shock 70 kDa protein 1B OS=Homo sapiens OX=9606 GN=HSPA1B PE=1 SV=1;sp|P0DMV8|HS71A_HUMAN Heat shock 70 kDa protein 1A OS=Hom	Heat shock 70 kDa protein 1B;Heat shock 70 kDa protein 1A	HSPA1B;HSPA1A	4.11261	4.11256	3.10527	30.1	48	677270000	11716000000	21165000	366120000	1217000000	10473000000	28	156	5	38	34	22	19	36	18	32	11	20	50.2	45.6	28.8	70.108	642	642;641;641;586;476	323.31				192	599;1172;1314;1525;1526;1527;1861;1868;3831;3903;3904;6341;6971;7277;7278;8032;8582;9044;9045;9663;9958;9959;10427;10761;10765;10766;10826;11440;11441;11805;12412;13020;14304;15583;16812;16843;17659;17660	True;True;True;True;True;True;True;True;True;True;True;True;False;True;True;True;False;True;True;True;True;True;True;False;True;True;True;True;True;True;True;True;True;False;True;True;True;True	624;625;1221;1222;1372;1588;1589;1590;1937;1944;3996;4070;4071;4072;6602;7256;7586;7587;7588;8375;8955;9433;9434;10082;10384;10385;10930;10931;11339;11345;11346;11347;11348;11349;11350;11351;11418;11419;12063;12064;12445;13086;13724;15091;16427;17703;17734;18580;18581	1773;1774;1775;1776;1777;1778;1779;1780;3478;3479;3480;3481;3482;3483;3886;3887;3888;3889;3890;3891;3892;4516;4517;4518;4519;4520;4521;4522;4523;4524;4525;4526;4527;4528;4529;4530;4531;5494;5495;5496;5497;5498;5499;5519;11461;11462;11463;11464;11465;11466;11467;11711;11712;11713;11714;11715;11716;11717;11718;11719;19089;19090;19091;19092;19093;19094;19095;19096;19097;19098;21114;21115;21116;22155…	1859;1860;1861;1862;1863;1864;1865;1866;1867;1868;1869;1870;1871;1872;3752;3753;3754;3755;3756;3757;4194;4195;4196;4197;4198;4199;4200;4847;4848;4849;4850;4851;4852;4853;4854;4855;4856;4857;4858;4859;4860;4861;4862;5878;5879;5880;5881;5882;5883;5884;5904;12236;12237;12238;12239;12240;12241;12242;12243;12244;12498;12499;12500;12501;12502;12503;12504;12505;12506;20388;20389;20390;20391;20392;20393;…	1866;3752;4198;4853;4855;4861;5883;5904;12241;12502;12506;20392;22693;23817;23823;26505;28262;29734;29736;31779;32680;32686;34346;35664;35692;35715;35957;38035;38044;39276;41216;43240;47608;52319;56465;56541;59225;59229	22;23	46;47;48;49;50;51	525;527	88;123;128;450;519;550	A0A0G2JIW1;P0DMV9;P0DMV8;P0DMV8-2;V9GZ37	A0A0G2JIW1;P0DMV9;P0DMV8;P0DMV8-2;V9GZ37
sp|Q14149|MORC3_HUMAN MORC family CW-type zinc finger protein 3 OS=Homo sapiens OX=9606 GN=MORC3 PE=1 SV=3	MORC family CW-type zinc finger protein 3	MORC3	5.62201	5.62198	4.699	15.5	45.3	218870000	10779000000	4053200	199610000	389080000	10106000000	14	171	3	38	38	38	9	38	9	38	9	38	45.3	45.3	45.3	107.11	939	939;191;226	323.31				1696	350;1459;2365;4101;5773;6323;6476;6638;6639;6689;6690;6815;7243;7517;7589;8781;8782;9013;9014;9223;9714;9801;9802;10212;10511;10852;10963;11426;11427;11548;12220;12629;13189;13201;13225;14322;14323;14501	True;True;True;True;True;True;True;True;True;True;True;True;True;True;True;True;True;True;True;True;True;True;True;True;True;True;True;True;True;True;True;True;True;True;True;True;True;True	369;1520;2460;4276;6014;6584;6744;6916;6917;6967;6968;7097;7098;7550;7843;7844;7917;9166;9167;9401;9402;9625;9626;10135;10224;10225;10660;10661;11037;11446;11560;12048;12049;12176;12879;12880;13315;13910;13922;13923;13955;15110;15111;15293	1119;1120;1121;1122;1123;1124;4318;4319;4320;4321;4322;4323;4324;4325;4326;6955;6956;6957;6958;6959;12324;12325;12326;12327;17464;17465;17466;17467;19034;19035;19036;19552;19553;20073;20074;20075;20076;20077;20078;20079;20080;20081;20082;20240;20241;20242;20243;20244;20245;20246;20655;20656;20657;20658;20659;20660;20661;22033;22861;22862;22863;22864;23149;23150;23151;23152;23153;26830;26831;26832…	1199;1200;1201;1202;1203;1204;4637;4638;4639;4640;4641;4642;4643;4644;4645;4646;4647;4648;7390;7391;7392;7393;7394;13149;13150;13151;13152;18664;18665;18666;18667;20329;20330;20331;20888;20889;21441;21442;21443;21444;21445;21446;21447;21448;21449;21450;21451;21452;21620;21621;21622;21623;21624;21625;21626;21627;21628;21629;21630;22206;22207;22208;22209;22210;22211;22212;22213;23683;24567;24568;24…	1204;4642;7391;13151;18667;20329;20888;21442;21451;21621;21629;22212;23683;24569;25014;28953;28960;29626;29634;30340;31976;32240;32242;33431;34664;36041;36391;37990;37996;38401;40582;41930;43846;43890;44025;47670;47674;48254		668;669;670;671;672;673		156;240;385;426;481;769	Q14149;H0YHQ4;H0YIR5	Q14149
sp|O75396|SC22B_HUMAN Vesicle-trafficking protein SEC22b OS=Homo sapiens OX=9606 GN=SEC22B PE=1 SV=4	Vesicle-trafficking protein SEC22b	SEC22B	0.199955	0.199937	-0.0690321	52.1	44.2	9690400000	11131000000	692170000	795060000	10237000000	9758700000	42	101	2	15	15	15	14	13	14	13	14	13	52.1	52.1	52.1	24.593	215	215;79	323.31				1072	1195;2232;4686;6635;6636;7768;9231;10755;11189;11742;12765;15798;15799;16521;16753	True;True;True;True;True;True;True;True;True;True;True;True;True;True;True	1248;2317;4885;6911;6912;6913;6914;8102;9634;11329;11800;12381;13458;16656;16657;16658;17400;17401;17642	3557;3558;6555;6556;6557;6558;6559;14064;14065;14066;14067;20033;20034;20035;20036;20037;20038;20039;20040;20041;20042;20043;20044;20045;20046;20047;20048;20049;20050;20051;20052;20053;20054;20055;20056;20057;20058;20059;20060;20061;20062;20063;20064;20065;20066;20067;20068;20069;20070;20071;23744;23745;23746;23747;23748;23749;23750;23751;23752;23753;23754;28176;28177;33032;33033;33034;33035;3303…	3833;3834;6971;6972;6973;6974;6975;15016;15017;15018;15019;21396;21397;21398;21399;21400;21401;21402;21403;21404;21405;21406;21407;21408;21409;21410;21411;21412;21413;21414;21415;21416;21417;21418;21419;21420;21421;21422;21423;21424;21425;21426;21427;21428;21429;21430;21431;21432;21433;21434;21435;21436;21437;21438;21439;25658;25659;25660;25661;25662;25663;25664;25665;25666;25667;25668;25669;2567…	3834;6972;15019;21407;21435;25668;30356;35612;37220;39126;42353;53173;53182;55489;56267		353;354;355		6;20;149	O75396;A0A087X1A9	O75396
sp|O75925|PIAS1_HUMAN E3 SUMO-protein ligase PIAS1 OS=Homo sapiens OX=9606 GN=PIAS1 PE=1 SV=2;sp|O75925-2|PIAS1_HUMAN Isoform 2 of E3 SUMO-protein ligase PIAS1 OS=Homo sapiens OX=9606 GN=PIAS1;sp|O75925-3|PIAS1_HUMAN Isoform 3 of E3 SUMO-protein ligase PIA	E3 SUMO-protein ligase PIAS1	PIAS1	3.50675	3.50679	2.35945	25.5	31.2	885650000	10067000000	31630000	359540000	1720500000	8829200000	21	73	6	18	18	16	11	18	11	18	9	16	31.2	31.2	28.6	71.835	651	651;653;325;160;20;64	323.31				1086	288;289;1272;2728;3049;4981;7189;9314;9435;9724;9746;11674;12185;12234;12810;14254;15388;16854	True;True;True;True;True;True;True;True;True;True;True;True;True;True;True;True;True;True	303;304;305;1327;1328;2837;3177;5187;7488;7489;9722;9850;10145;10167;12307;12841;12896;13505;15041;16223;17746	913;914;915;916;917;918;3775;3776;3777;7998;7999;8000;9082;9083;9084;9085;9086;9087;9088;14968;14969;14970;14971;21854;21855;21856;21857;21858;21859;21860;21861;28424;28791;28792;28793;29670;29671;29672;29673;29674;29729;29730;29731;29732;29733;29734;29735;29736;36107;36108;36109;36110;36111;36112;36113;37581;37582;37583;37584;37585;37743;37744;39536;39537;39538;39539;39540;39541;44149;44150;4415…	982;983;984;985;986;987;4081;4082;4083;8517;8518;8519;9703;9704;9705;9706;9707;9708;9709;15989;15990;15991;15992;15993;15994;23479;23480;23481;23482;23483;23484;23485;23486;30617;31060;31061;31062;31997;31998;31999;32000;32001;32002;32003;32004;32005;32006;32062;32063;32064;32065;32066;32067;32068;32069;38882;38883;38884;38885;38886;38887;38888;40459;40460;40461;40462;40463;40624;40625;42526;4252…	982;985;4082;8518;9705;15993;23481;30617;31062;32004;32067;38882;40463;40624;42527;47400;51634;56590		361;362;363		10;12;393	O75925;O75925-2;O75925-3;H3BSI8;H3BUL7;H3BS65	O75925;O75925-2;O75925-3
sp|Q02809|PLOD1_HUMAN Procollagen-lysine,2-oxoglutarate 5-dioxygenase 1 OS=Homo sapiens OX=9606 GN=PLOD1 PE=1 SV=2;sp|Q02809-2|PLOD1_HUMAN Isoform 2 of Procollagen-lysine,2-oxoglutarate 5-dioxygenase 1 OS=Homo sapiens OX=9606 GN=PLOD1	Procollagen-lysine,2-oxoglutarate 5-dioxygenase 1	PLOD1	2.51006	2.51005	1.70604	45	55.8	1607300000	9155900000	36530000	208090000	2504500000	8171300000	55	158	4	35	35	35	24	35	24	35	24	35	55.8	55.8	55.8	83.549	727	727;774;283;225	323.31				1591	1299;1369;4098;4113;5371;5854;6119;6135;6136;6725;6726;6753;7348;8205;9448;9798;9879;9919;10051;10091;11142;11596;12286;12709;12896;12999;13136;13137;14085;14086;15557;16214;17625;17671;17831	True;True;True;True;True;True;True;True;True;True;True;True;True;True;True;True;True;True;True;True;True;True;True;True;True;True;True;True;True;True;True;True;True;True;True	1357;1427;4273;4288;4289;5591;6099;6372;6390;6391;6392;7003;7004;7032;7033;7664;8558;9863;10221;10305;10345;10480;10521;11751;12225;12226;12951;12952;13398;13597;13702;13852;13853;14864;14865;16400;17085;18545;18592;18762	3850;3851;3852;3853;4039;4040;4041;4042;4043;4044;4045;4046;4047;12313;12314;12315;12316;12317;12318;12319;12371;12372;12373;12374;12375;12376;12377;12378;12379;12380;12381;12382;12383;12384;16177;17702;17703;17704;17705;17706;18441;18442;18443;18444;18445;18446;18493;18494;18495;18496;18497;18498;18499;18500;18501;18502;18503;18504;20333;20334;20335;20336;20470;20471;20472;20473;20474;20475;2047…	4157;4158;4159;4160;4349;4350;4351;4352;4353;4354;4355;4356;4357;13138;13139;13140;13141;13142;13143;13144;13196;13197;13198;13199;13200;13201;13202;13203;13204;13205;13206;13207;13208;13209;13210;17304;18909;18910;18911;18912;18913;19698;19699;19700;19701;19702;19703;19704;19705;19760;19761;19762;19763;19764;19765;19766;19767;19768;19769;19770;19771;19772;21723;21724;21725;21726;22018;22019;2202…	4158;4357;13141;13204;17304;18913;19704;19762;19772;21725;21726;22024;24014;26976;31102;32230;32483;32579;32938;33035;37065;38540;40796;42161;42841;43172;43656;43657;46832;46840;52232;54526;59116;59263;59765		610;611;612;613;614		223;408;494;603;623	Q02809;Q02809-2;Q5JXB7;Q5JXB8	Q02809;Q02809-2
sp|P11387|TOP1_HUMAN DNA topoisomerase 1 OS=Homo sapiens OX=9606 GN=TOP1 PE=1 SV=2	DNA topoisomerase 1	TOP1	-0.341154	-0.341134	-1.21033	51.1	48.6	13994000000	11047000000	368270000	290720000	18576000000	8028000000	138	181	14	63	63	63	48	47	48	47	48	47	55.3	55.3	55.3	90.725	765	765;503;601;376;201;221;33;49;111;123;134;164;164;167	323.31				1226	337;1622;1623;1711;1712;1870;1914;2546;3029;3068;3221;3281;3777;4071;4072;5291;5292;5650;5758;5933;5968;5969;6061;6397;6398;7254;7462;7463;7575;8109;8121;8122;8123;8211;8212;9284;9296;9689;10455;10456;10929;10930;11047;11246;11247;11248;11449;12267;12330;12331;13343;13896;15761;15762;16014;16015;17035;17271;17304;17405;17639;18013;18014	True;True;True;True;True;True;True;True;True;True;True;True;True;True;True;True;True;True;True;True;True;True;True;True;True;True;True;True;True;True;True;True;True;True;True;True;True;True;True;True;True;True;True;True;True;True;True;True;True;True;True;True;True;True;True;True;True;True;True;True;True;True;True	356;1687;1688;1778;1779;1780;1946;1992;2648;3152;3196;3353;3423;3424;3941;4246;4247;5509;5510;5882;5998;5999;6179;6216;6217;6313;6665;6666;7562;7563;7783;7784;7902;8459;8471;8472;8473;8474;8564;8565;9691;9704;10108;10967;10968;10969;11526;11527;11649;11858;11859;11860;11861;11862;12074;12929;12999;13000;14077;14078;14663;14664;14665;16618;16619;16880;16881;17934;18178;18213;18318;18559;18560;1894…	1084;1085;1086;1087;1088;1089;4782;4783;4784;4785;4786;4787;4788;4789;4790;4791;4792;5063;5064;5065;5066;5067;5068;5069;5070;5071;5072;5073;5523;5524;5648;5649;7489;8958;8959;8960;9147;9594;9595;9596;9597;9598;9599;9827;9828;9829;9830;9831;9832;9833;9834;9835;9836;9837;11330;12225;12226;12227;12228;12229;12230;12231;12232;12233;12234;12235;12236;12237;12238;15949;15950;15951;15952;15953;15954;170…	1162;1163;1164;1165;1166;1167;1168;5135;5136;5137;5138;5139;5140;5141;5142;5143;5144;5145;5423;5424;5425;5426;5427;5428;5429;5430;5431;5432;5433;5908;5909;6035;6036;7974;9575;9576;9577;9771;10238;10239;10240;10241;10242;10243;10244;10245;10246;10247;10495;10496;10497;10498;10499;10500;10501;10502;10503;10504;10505;12099;13037;13038;13039;13040;13041;13042;13043;13044;13045;13046;13047;13048;13049…	1162;5138;5142;5429;5430;5908;6035;7974;9577;9771;10242;10504;12099;13044;13051;17072;17075;18202;18563;19145;19231;19234;19541;20651;20658;23716;24365;24371;24958;26728;26754;26757;26760;26997;27002;30511;30570;31869;34467;34474;36284;36288;36718;37402;37404;37413;38095;40723;40938;40939;44344;46210;53059;53062;53949;53950;57214;57981;58086;58462;59151;60281;60289	153;154;155	436;437;438;439;440;441;442;443	48;55;59	263;286;428;555;581;644;645;699	P11387;Q969P6-2;Q969P6;E5RIC7;E5RJ95;E5RFS0;E5RJ33;H0YBR3;H0YAR3;H0YC03;E5RGE7;E5RGR4;E5RFE3;E5RGR2	P11387
			4.33343	4.33346	2.76215	18.3	28.5	438700000	8844200000	10967000	221100000	1170200000	7938700000	19	79	12	20	20	20	10	19	10	19	10	19	30.5	30.5	30.5	69.293	607	607;454;604;609;609;417;459;494;417;197;396;396	171.27			+	477	343;1004;1848;2450;4018;5778;7651;7767;8370;8689;9955;10000;10022;12387;12631;12633;15666;16744;17762;17763	True;True;True;True;True;True;True;True;True;True;True;True;True;True;True;True;True;True;True;True	362;1040;1924;2549;4191;6019;7981;8101;8728;9070;10381;10429;10451;13061;13317;13319;16514;16515;17633;18685;18686	1100;1101;1102;1103;1104;2978;5458;5459;5460;5461;5462;5463;7220;12048;12049;12050;12051;12052;12053;12054;17478;17479;17480;17481;23333;23334;23335;23336;23337;23338;23738;23739;23740;23741;23742;23743;25498;25499;25500;25501;25502;26509;30312;30313;30314;30315;30316;30317;30438;30439;30440;30507;30508;38222;38223;38224;38225;38972;38973;38974;38975;38976;38977;38981;38982;38983;38984;38985;4889…	1179;1180;1181;1182;1183;1184;3221;5834;5835;5836;5837;5838;5839;5840;5841;5842;5843;5844;5845;7688;12854;12855;12856;12857;12858;12859;12860;18678;18679;18680;18681;25211;25212;25213;25214;25215;25216;25648;25649;25650;25651;25652;25653;25654;25655;25656;25657;27553;27554;27555;27556;27557;27558;28600;32665;32666;32667;32668;32669;32670;32795;32796;32797;32866;32867;41143;41144;41145;41146;41147…	1182;3221;5841;7688;12859;18679;25211;25649;27558;28600;32669;32797;32866;41146;41937;41948;52623;56239;59528;59529	77	181	304	571	CON__P02769;H0YA55;A0A0C4DGB6;CON__P02768-1;P02768;C9JKR2;D6RHD5;B7WNR0;P02768-2;H7C013;A0A087WWT3;P02768-3	CON__P02769
sp|P02786|TFR1_HUMAN Transferrin receptor protein 1 OS=Homo sapiens OX=9606 GN=TFRC PE=1 SV=2;tr|G3V0E5|G3V0E5_HUMAN Transferrin receptor (P90, CD71), isoform CRA_c OS=Homo sapiens OX=9606 GN=TFRC PE=1 SV=1	Transferrin receptor protein 1;Transferrin receptor protein 1, serum form	TFRC	1.38425	1.38424	0.64921	47.6	49.6	3516100000	9178300000	90157000	235340000	4941500000	7749800000	72	145	4	44	44	44	32	40	32	40	32	40	56.7	56.7	56.7	84.87	760	760;679;118;81	323.31				1146	29;31;247;590;591;1676;2394;2395;2623;2624;4805;5797;5866;6546;7532;7949;7950;7989;7990;8072;9006;9625;9791;9857;9858;9874;9875;9923;10028;10119;10120;12427;12735;12736;12950;13434;14173;15284;15870;16052;16671;16846;17160;17815	True;True;True;True;True;True;True;True;True;True;True;True;True;True;True;True;True;True;True;True;True;True;True;True;True;True;True;True;True;True;True;True;True;True;True;True;True;True;True;True;True;True;True;True	31;33;259;615;616;1742;2490;2491;2728;2729;5006;6039;6111;6816;7859;8287;8288;8289;8290;8332;8333;8421;9394;10044;10213;10282;10283;10300;10301;10349;10457;10550;10551;13101;13424;13425;13652;14174;14956;16110;16730;16921;17556;17737;18065;18745	79;83;84;85;86;87;88;785;786;787;1751;1752;1753;1754;4970;4971;7049;7050;7051;7052;7053;7054;7055;7056;7057;7058;7059;7060;7722;7723;7724;7725;7726;7727;7728;7729;7730;7731;7732;7733;14394;14395;14396;14397;14398;14399;14400;14401;14402;14403;14404;14405;17543;17544;17545;17546;17547;17548;17549;17734;17735;17736;19768;19769;19770;19771;19772;19773;22975;22976;22977;22978;22979;22980;24300;24301;…	81;85;86;87;88;89;90;843;844;845;846;1837;1838;1839;1840;5329;5330;7506;7507;7508;7509;7510;7511;7512;7513;7514;7515;7516;7517;8236;8237;8238;8239;8240;8241;8242;8243;8244;8245;8246;8247;8248;15366;15367;15368;15369;15370;15371;15372;15373;15374;15375;15376;15377;18743;18744;18745;18746;18747;18748;18749;18941;18942;18943;21112;21113;21114;21115;21116;21117;21118;21119;21120;24830;24831;24832;248…	81;90;844;1837;1840;5329;7509;7517;8244;8248;15377;18748;18943;21112;24833;26248;26255;26400;26402;26629;29613;31660;32201;32394;32402;32456;32464;32586;32881;33104;33107;41269;42227;42231;43023;44663;47156;51272;53445;54089;56006;56552;57632;59709	127	393;394	358	432;436	P02786;G3V0E5;H7C3V5;F8WBE5	P02786;G3V0E5
sp|O43676|NDUB3_HUMAN NADH dehydrogenase [ubiquinone] 1 beta subcomplex subunit 3 OS=Homo sapiens OX=9606 GN=NDUFB3 PE=1 SV=3;tr|C9JKQ2|C9JKQ2_HUMAN NADH dehydrogenase [ubiquinone] 1 beta subcomplex subunit 3 (Fragment) OS=Homo sapiens OX=9606 GN=NDUFB3 PE	NADH dehydrogenase [ubiquinone] 1 beta subcomplex subunit 3	NDUFB3	1.39206	1.39205	1.22053	73.5	53.1	2845300000	7467600000	474220000	1244600000	3166000000	7377800000	23	43	2	13	13	13	10	9	10	9	10	9	80.6	80.6	80.6	11.402	98	98;65	136.04				1024	2330;5166;5167;6047;6048;10270;12483;12484;14430;14431;17264;17265;17775	True;True;True;True;True;True;True;True;True;True;True;True;True	2423;5377;5378;6298;6299;10739;13161;13162;15221;15222;18171;18172;18701	6857;6858;6859;15539;15540;15541;15542;15543;15544;15545;15546;15547;15548;15549;15550;18252;18253;18254;18255;18256;18257;18258;18259;18260;18261;18262;18263;18264;18265;18266;18267;31306;31307;31308;31309;31310;38509;38510;38511;38512;38513;44732;44733;44734;44735;44736;53876;53877;53878;53879;55439	7287;7288;7289;16608;16609;16610;16611;16612;16613;16614;16615;16616;16617;16618;16619;16620;16621;16622;16623;19478;19479;19480;19481;19482;19483;19484;19485;19486;19487;19488;19489;19490;19491;19492;19493;19494;19495;19496;19497;19498;19499;19500;19501;19502;33736;33737;33738;33739;33740;41443;41444;41445;41446;41447;48044;48045;48046;48047;48048;48049;48050;57967;57968;57969;57970;59589	7289;16616;16623;19485;19494;33739;41444;41446;48045;48050;57967;57969;59589					O43676;C9JKQ2	O43676;C9JKQ2
sp|Q92504|S39A7_HUMAN Zinc transporter SLC39A7 OS=Homo sapiens OX=9606 GN=SLC39A7 PE=1 SV=2	Zinc transporter SLC39A7	SLC39A7	0.391943	0.391939	-0.223579	19.4	14.1	5939600000	7793700000	742450000	974210000	8476500000	7259600000	22	41	2	12	12	12	11	8	11	8	11	8	19.4	19.4	19.4	50.117	469	469;220	294.37				2144	2001;2002;2003;3065;4905;4906;4921;11722;12610;12611;16882;16883	True;True;True;True;True;True;True;True;True;True;True;True	2081;2082;2083;3193;5109;5110;5125;12358;13295;13296;17777;17778	5894;5895;5896;5897;5898;5899;5900;5901;5902;5903;5904;5905;5906;5907;5908;5909;5910;5911;5912;5913;5914;5915;5916;9136;9137;14734;14735;14736;14737;14738;14739;14740;14741;14742;14781;36277;38894;38895;38896;38897;38898;38899;38900;38901;38902;38903;52698;52699;52700;52701;52702;52703;52704;52705;52706;52707	6290;6291;6292;6293;6294;6295;6296;6297;6298;6299;6300;6301;6302;6303;6304;6305;6306;6307;6308;6309;6310;6311;6312;6313;6314;6315;6316;6317;9760;9761;15746;15747;15748;15749;15750;15751;15752;15753;15754;15755;15796;39078;41847;41848;41849;41850;41851;41852;41853;41854;41855;41856;41857;56697;56698;56699;56700;56701;56702;56703;56704;56705;56706	6298;6305;6314;9761;15748;15754;15796;39078;41847;41855;56700;56706					Q92504;A2AAT0	Q92504
sp|P29590|PML_HUMAN Protein PML OS=Homo sapiens OX=9606 GN=PML PE=1 SV=3;sp|P29590-9|PML_HUMAN Isoform PML-3 of Protein PML OS=Homo sapiens OX=9606 GN=PML;sp|P29590-3|PML_HUMAN Isoform PML-8 of Protein PML OS=Homo sapiens OX=9606 GN=PML;sp|P29590-8|PML_HUM	Protein PML	PML	6.66555	6.6656	5.61274	7.7	38.5	73579000	7469400000	1501600	152440000	144620000	7076700000	7	114	9	33	33	0	5	33	5	33	0	0	38.5	38.5	0	97.55	882	882;641;824;829;560;240;423;435;217	323.31				1333	348;400;1213;1293;1371;1380;1381;1483;1484;2552;3157;3411;5288;5289;5653;6817;6904;7193;8006;8450;8732;8798;9570;10043;11139;11839;12987;14001;14657;14658;16348;16418;17855	True;True;True;True;True;True;True;True;True;True;True;True;True;True;True;True;True;True;True;True;True;True;True;True;True;True;True;True;True;True;True;True;True	367;422;1266;1351;1429;1438;1439;1546;1547;2654;3288;3562;5506;5507;5885;7100;7188;7496;8349;8811;9116;9183;9988;10472;11748;12481;13689;13690;14771;15454;15455;17225;17296;18787;18788	1115;1254;1255;3597;3598;3599;3838;3839;3840;3841;3842;3843;4053;4054;4055;4056;4057;4058;4084;4085;4086;4087;4088;4089;4090;4091;4408;4409;4410;4411;4412;4413;4414;7503;7504;7505;9408;9409;9410;9411;9412;10265;10266;10267;15943;15944;15945;15946;15947;17023;17024;20663;20664;20913;20914;20915;21888;21889;21890;21891;21892;21893;24482;24483;24484;25719;25720;25721;25722;26630;26631;26871;26872;29…	1195;1334;1335;3890;3891;3892;4145;4146;4147;4148;4149;4150;4363;4364;4365;4366;4367;4368;4395;4396;4397;4398;4399;4400;4401;4402;4734;4735;4736;4737;4738;4739;4740;7988;7989;7990;10036;10037;10038;10039;10040;10955;10956;10957;17062;17063;17064;17065;17066;18206;18207;22215;22216;22484;22485;22486;23523;23524;23525;23526;23527;23528;26435;26436;26437;27785;27786;27787;27788;28723;28724;28993;289…	1195;1334;3890;4150;4363;4398;4401;4735;4739;7990;10039;10957;17063;17065;18207;22215;22485;23528;26435;27785;28723;28993;31471;32912;37052;39370;43143;46535;49079;49084;54969;55199;59832		485;486;487		312;744;750	P29590;P29590-9;P29590-3;P29590-8;P29590-4;H3BT29;P29590-14;P29590-10;H3BVD2	P29590;P29590-9;P29590-3;P29590-8;P29590-4;H3BT29
tr|A0A2R8Y8C6|A0A2R8Y8C6_HUMAN Autism susceptibility gene 2 protein OS=Homo sapiens OX=9606 GN=AUTS2 PE=1 SV=1;sp|Q8WXX7|AUTS2_HUMAN Autism susceptibility gene 2 protein OS=Homo sapiens OX=9606 GN=AUTS2 PE=1 SV=1;sp|Q8WXX7-2|AUTS2_HUMAN Isoform 2 of Autism	Autism susceptibility gene 2 protein	AUTS2	-0.557523	-0.557559	-0.285912	28.9	25	8598200000	5842200000	179130000	121710000	8595100000	7049900000	80	120	5	36	36	3	27	27	27	27	2	2	33.8	33.8	2.3	138.89	1258	1258;1259;1235;266;151	275.43				273	2000;2318;2372;2429;2661;2852;3400;4054;4055;4623;4848;4856;5833;5839;6898;6899;7232;7309;8507;8522;8526;9756;11704;12552;12882;13003;14110;15384;15385;15399;15503;15504;15505;15582;16356;16749	True;True;True;True;True;True;True;True;True;True;True;True;True;True;True;True;True;True;True;True;True;True;True;True;True;True;True;True;True;True;True;True;True;True;True;True	2080;2409;2467;2525;2768;2964;3549;4228;4229;4820;5051;5059;6077;6078;6084;7182;7183;7539;7620;8872;8873;8889;8895;10177;10178;12340;13233;13582;13706;14889;16219;16220;16234;16340;16341;16342;16426;17233;17638	5890;5891;5892;5893;6810;6811;6812;6813;6814;6815;6816;6984;7151;7152;7153;7818;7819;7820;7821;7822;8313;10202;10203;10204;10205;10206;10207;10208;10209;10210;10211;12163;12164;12165;12166;12167;12168;12169;12170;12171;12172;13859;13860;13861;13862;14564;14584;17643;17644;17645;17646;17647;17648;17660;17661;20897;20898;20899;20900;20901;20902;20903;22005;22006;22007;22008;22009;22010;22011;22012;…	6285;6286;6287;6288;6289;7236;7237;7238;7239;7240;7241;7242;7433;7618;7619;7620;8333;8334;8335;8336;8337;8864;10889;10890;10891;10892;10893;10894;10895;10896;10897;10898;10899;10900;12975;12976;12977;12978;12979;12980;12981;12982;12983;12984;14793;14794;14795;14796;14797;14798;14799;14800;15549;15569;18846;18847;18848;18849;18850;18851;18852;18853;18865;18866;22468;22469;22470;22471;22472;22473;2…	6285;7241;7433;7619;8337;8864;10894;12978;12983;14794;15549;15569;18846;18865;22471;22474;23660;23897;27994;28040;28071;32108;39015;41686;42797;43183;46930;51610;51623;51659;52030;52040;52041;52308;54998;56253		4;5;6		592;641;1156	A0A2R8Y8C6;Q8WXX7;Q8WXX7-2;Q8WXX7-3;A0A2R8Y516	A0A2R8Y8C6;Q8WXX7;Q8WXX7-2
sp|O75444-1|MAF_HUMAN Isoform 1 of Transcription factor Maf OS=Homo sapiens OX=9606 GN=MAF;tr|H3BP11|H3BP11_HUMAN Transcription factor Maf OS=Homo sapiens OX=9606 GN=MAF PE=1 SV=1;sp|O75444|MAF_HUMAN Transcription factor Maf OS=Homo sapiens OX=9606 GN=MAF	Transcription factor Maf	MAF	1.78362	1.78358	0.918487	24.6	39.5	2223800000	7656300000	202170000	696030000	3583400000	6773100000	17	63	3	17	17	17	8	17	8	17	8	17	39.5	39.5	39.5	41.961	403	403;383;373	323.31				1074	1419;3383;3842;4314;5563;5867;5868;6366;7258;7473;9996;9997;10162;11428;11429;12173;16614	True;True;True;True;True;True;True;True;True;True;True;True;True;True;True;True;True	1479;3531;4008;4499;5792;6112;6113;6629;7567;7795;10425;10426;10598;10599;12050;12051;12829;17494	4193;4194;10151;10152;11498;11499;11500;11501;11502;11503;11504;12945;12946;12947;12948;12949;12950;12951;16724;16725;16726;16727;16728;17737;17738;17739;17740;17741;17742;17743;17744;17745;17746;17747;17748;17749;17750;17751;17752;17753;17754;17755;17756;17757;19189;22082;22713;22714;22715;22716;22717;22718;22719;30430;30431;30432;30433;30434;30435;30856;30857;30858;35285;35286;35287;35288;35289…	4507;4508;10835;10836;12275;12276;12277;12278;12279;12280;12281;13806;13807;13808;13809;13810;13811;13812;17879;17880;17881;17882;17883;18944;18945;18946;18947;18948;18949;18950;18951;18952;18953;18954;18955;18956;18957;18958;18959;18960;18961;18962;18963;18964;18965;20504;23738;24406;24407;24408;24409;24410;24411;24412;32787;32788;32789;32790;32791;32792;33225;33226;33227;37999;38000;38001;38002…	4508;10835;12277;13809;17879;18947;18958;20504;23738;24409;32787;32792;33227;37999;38009;40429;55800		356		28	O75444-1;H3BP11;O75444	O75444-1;H3BP11;O75444
;sp|P35908|K22E_HUMAN Keratin, type II cytoskeletal 2 epidermal OS=Homo sapiens OX=9606 GN=KRT2 PE=1 SV=2	Keratin, type II cytoskeletal 2 epidermal	KRT2	-0.777668	-0.777648	-0.774057	75	72	10305000000	6011000000	257630000	150280000	11537000000	6746500000	113	133	2	54	51	1	45	42	42	40	1	1	78.7	76.8	4.7	65.432	639	639;639	323.31			+	490	1378;2489;2490;2563;2731;2968;3757;3758;3912;4079;4795;4796;4836;4897;4902;5439;5682;5689;6052;7796;7906;7907;9072;9218;9219;9417;9418;11111;11112;11148;11150;11623;11624;11625;13560;13586;13587;13850;14542;14543;15188;15189;15514;15515;15516;15517;15952;15964;16641;17253;17478;17483;17592;17690	True;True;True;True;True;True;True;True;True;False;True;True;True;True;True;True;True;True;False;True;True;True;True;True;True;True;True;True;True;True;True;True;True;True;True;True;True;True;True;True;True;True;True;True;True;True;True;True;True;True;False;True;True;True	1436;2589;2590;2591;2666;2840;3090;3921;3922;4082;4254;4996;4997;5038;5101;5106;5661;5917;5924;6304;8131;8241;8242;9462;9463;9620;9621;9831;9832;11717;11718;11757;11759;12253;12254;12255;14304;14330;14331;14610;15336;15337;16007;16008;16351;16352;16353;16354;16355;16813;16825;17521;17522;18159;18160;18391;18396;18511;18611	4076;4077;4078;4079;4080;4081;7307;7308;7309;7310;7311;7312;7313;7542;7543;7544;8010;8761;11276;11277;11278;11279;11280;11281;11282;11283;11284;11285;11286;11750;11751;11752;11753;11754;11755;12254;12255;12256;12257;12258;14371;14372;14373;14374;14375;14376;14377;14378;14493;14494;14495;14496;14497;14498;14499;14500;14501;14502;14503;14710;14711;14728;14729;14730;16375;16376;16377;16378;17118;171…	4387;4388;4389;4390;4391;4392;7775;7776;7777;7778;7779;7780;7781;8030;8031;8032;8529;9363;12041;12042;12043;12044;12045;12046;12047;12048;12049;12050;12051;12537;12538;12539;12540;12541;12542;12543;13069;13070;13071;13072;13073;13074;15343;15344;15345;15346;15347;15348;15349;15350;15478;15479;15480;15481;15482;15483;15484;15485;15486;15487;15488;15721;15722;15739;15740;15741;17514;17515;17516;175…	4391;7778;7781;8031;8529;9363;12043;12048;12543;13074;15343;15350;15486;15722;15739;17515;18308;18326;19519;25776;26116;26121;29837;30329;30333;31020;31021;36926;36937;37086;37092;38664;38666;38677;45062;45157;45167;46040;48756;48764;50886;50890;52067;52078;52081;52082;53743;53787;55880;57933;58651;58668;59005;59308	74	192;193;194;195;196	267	216;257;294;337;467	CON__P35908v2;P35908	CON__P35908v2;P35908
sp|Q15149-4|PLEC_HUMAN Isoform 4 of Plectin OS=Homo sapiens OX=9606 GN=PLEC	Plectin	PLEC	1.29305	1.29303	0.142925	31.7	46.5	3589200000	8795200000	12728000	31189000	5947700000	6567100000	197	460	1	217	217	2	107	193	107	193	1	2	52	52	0.5	516.19	4547	4547	323.31				1741	94;99;362;372;621;665;691;700;710;856;1076;1077;1264;1275;1276;1277;1278;1301;1319;1320;1326;1370;1384;1392;1394;1614;1723;1724;1725;1726;1727;1747;1807;2151;2205;2236;2420;2474;2684;2869;3083;3139;3328;3329;3360;3413;3483;3496;3718;3997;3998;4024;4089;4144;4290;4608;4732;4733;4734;4814;4830;4831;4968;4969;5020;5096;5119;5187;5495;5587;5605;5608;5616;5638;6322;6363;6513;6514;6656;7261;7330;7816;7…	True;True;True;True;True;True;True;True;True;True;True;True;True;True;True;True;True;True;True;True;True;True;True;True;True;True;True;True;True;True;True;True;True;True;True;True;True;True;True;True;True;True;True;True;True;True;True;True;True;True;True;True;True;True;True;True;True;True;True;True;True;True;True;True;True;True;True;True;True;True;True;True;True;True;True;True;True;True;True;True…	96;101;382;392;647;691;718;727;737;887;1113;1114;1319;1331;1332;1333;1334;1359;1377;1378;1384;1428;1443;1451;1453;1679;1791;1792;1793;1794;1795;1815;1881;2234;2289;2321;2516;2573;2793;2983;3212;3269;3474;3475;3506;3564;3637;3650;3878;4170;4171;4197;4264;4321;4474;4805;4933;4934;4935;5015;5032;5033;5172;5173;5226;5305;5328;5399;5719;5816;5834;5837;5847;5870;6583;6626;6781;6782;6934;7570;7641;8151;…	262;263;264;265;266;275;1149;1150;1175;1176;1177;1178;1839;1840;1841;1842;1958;1959;2023;2024;2043;2044;2045;2046;2065;2066;2067;2068;2069;2070;2071;2560;2561;2562;2563;2564;2565;2566;3185;3186;3187;3188;3189;3190;3739;3740;3741;3742;3743;3744;3745;3746;3747;3782;3783;3784;3785;3786;3787;3788;3789;3790;3791;3792;3856;3857;3858;3912;3913;3914;3915;3916;3917;3918;3919;3932;3933;4048;4049;4050;4051;…	269;270;271;272;273;282;1229;1230;1255;1256;1257;1258;1932;1933;1934;1935;2056;2057;2123;2124;2143;2144;2145;2146;2166;2167;2168;2169;2170;2171;2172;2789;2790;2791;2792;2793;2794;2795;3443;3444;3445;3446;3447;3448;4042;4043;4044;4045;4046;4047;4048;4049;4050;4088;4089;4090;4091;4092;4093;4094;4095;4096;4097;4098;4163;4164;4165;4221;4222;4223;4224;4225;4226;4227;4228;4241;4242;4358;4359;4360;4361;…	272;282;1230;1258;1933;2057;2124;2143;2168;2795;3445;3448;4049;4092;4093;4094;4098;4165;4223;4226;4241;4360;4416;4440;4446;5120;5464;5469;5471;5474;5476;5537;5728;6753;6891;6979;7597;7749;8401;8962;9813;9981;10657;10659;10767;10964;11233;11269;11862;12808;12809;12874;13106;13293;13742;14737;15175;15177;15178;15413;15466;15467;15925;15927;16130;16412;16481;16669;17657;17947;17997;18007;18063;18134…		242;684		171;2378	Q15149-4	Q15149-4
sp|P46776|RL27A_HUMAN 60S ribosomal protein L27a OS=Homo sapiens OX=9606 GN=RPL27A PE=1 SV=2;tr|E9PLL6|E9PLL6_HUMAN 60S ribosomal protein L27a OS=Homo sapiens OX=9606 GN=RPL27A PE=1 SV=1;tr|E9PJD9|E9PJD9_HUMAN 60S ribosomal protein L27a OS=Homo sapiens OX=	60S ribosomal protein L27a	RPL27A	-0.71937	-0.719407	-1.40846	45.3	32.4	13338000000	8101000000	1905500000	1157300000	17250000000	6498300000	18	23	6	11	11	11	9	6	9	6	9	6	60.1	60.1	60.1	16.561	148	148;108;91;113;41;42	40.154				1412	5044;6649;9552;10054;11124;11432;13447;14819;16182;16183;17612	True;True;True;True;True;True;True;True;True;True;True	5250;6927;9970;10483;11730;11731;12054;14187;15626;17052;17053;18532	15170;15171;15172;20108;20109;20110;20111;20112;20113;20114;20115;20116;20117;20118;29149;30583;30584;30585;34331;34332;34333;34334;34335;34336;34337;34338;34339;34340;34341;34342;35299;41576;46084;46085;46086;46087;46088;46089;50580;50581;50582;54935;54936;54937;54938;54939	16207;16208;16209;21478;21479;21480;21481;21482;21483;21484;21485;21486;21487;21488;21489;31424;32944;32945;32946;32947;32948;36989;36990;36991;36992;36993;36994;36995;36996;36997;36998;36999;37000;37001;37002;37003;37004;38013;44712;49585;49586;49587;49588;49589;49590;49591;49592;49593;49594;54446;54447;54448;59072;59073;59074;59075;59076	16208;21478;31424;32946;36996;38013;44712;49586;54446;54448;59075	179		94		P46776;E9PLL6;E9PJD9;E9PLX7;E9PKT2;H0YF34	P46776;E9PLL6;E9PJD9
sp|O15391|TYY2_HUMAN Transcription factor YY2 OS=Homo sapiens OX=9606 GN=YY2 PE=2 SV=1	Transcription factor YY2	YY2	-0.139041	-0.139033	-0.636931	14.8	9.1	9898000000	8988600000	761380000	691430000	10079000000	6481600000	47	139	1	9	2	2	9	6	2	2	2	2	14.8	4.3	4.3	41.347	372	372	23.269				1003	3751;4341;5809;5810;7267;7524;9329;12592;12634	False;False;False;False;False;True;True;False;False	3915;4526;6051;6052;7576;7851;9739;13277;13320	11251;11252;11253;11254;11255;11256;13031;13032;13033;13034;13035;13036;13037;13038;13039;13040;13041;13042;13043;13044;13045;13046;17580;17581;17582;17583;17584;17585;17586;17587;17588;22103;22104;22105;22106;22107;22904;22905;22906;22907;22908;22909;22910;22911;22912;22913;22914;22915;22916;22917;22918;22919;22920;22921;22922;22923;22924;22925;22926;22927;22928;22929;22930;22931;22932;22933;229…	12014;12015;12016;12017;12018;12019;12020;12021;13892;13893;13894;13895;13896;13897;13898;13899;13900;13901;13902;13903;13904;13905;13906;13907;13908;13909;13910;13911;13912;13913;13914;13915;13916;13917;13918;13919;18781;18782;18783;18784;18785;18786;18787;18788;18789;23759;23760;23761;23762;23763;24648;24649;24650;24651;24652;24653;24654;24655;24656;24657;24658;24659;24660;24661;24662;24663;246…	12015;13915;18786;18789;23761;24721;30743;41788;41956	117;118		309;320		O15391	O15391
sp|Q5HYJ3|FA76B_HUMAN Protein FAM76B OS=Homo sapiens OX=9606 GN=FAM76B PE=1 SV=3	Protein FAM76B	FAM76B	-1.3827	-1.3827	-2.00797	65.2	49.3	20570000000	7888600000	1028500000	394430000	25542000000	6350300000	67	67	1	31	31	3	27	19	27	19	3	3	67.3	67.3	11.8	38.708	339	339	323.31				1828	157;158;234;718;2355;2356;2357;2358;2359;2777;3164;3534;3801;5919;6892;7542;7685;7686;8194;8195;8196;9768;10572;11456;11886;13156;13712;13713;14148;14149;17824	True;True;True;True;True;True;True;True;True;True;True;True;True;True;True;True;True;True;True;True;True;True;True;True;True;True;True;True;True;True;True	161;162;246;745;2450;2451;2452;2453;2454;2886;2887;3295;3689;3966;6165;7176;7869;8016;8017;8546;8547;8548;8549;10190;11111;12081;12529;13875;14459;14460;14930;14931;18754	455;456;730;731;732;733;734;2088;2089;2090;2091;2092;2093;2094;2095;2096;2097;2098;2099;6924;6925;6926;6927;6928;6929;6930;6931;6932;6933;6934;6935;6936;6937;6938;6939;8124;8125;8126;8127;8128;8129;8130;8131;8132;9428;9429;9430;9431;9432;9433;10627;10628;10629;10630;11394;11395;11396;17880;17881;20848;20849;20850;20851;20852;20853;23015;23016;23017;23018;23019;23445;23446;23447;23448;24961;24962;…	472;473;781;782;783;784;785;786;787;2189;2190;2191;2192;2193;2194;2195;2196;2197;2198;2199;2200;7359;7360;7361;7362;7363;7364;7365;7366;7367;7368;7369;7370;7371;7372;7373;7374;8669;8670;8671;8672;8673;8674;8675;8676;8677;10056;10057;10058;10059;10060;10061;11366;11367;11368;11369;12164;12165;12166;19093;19094;22406;22407;22408;22409;22410;22411;22412;24871;24872;24873;24874;24875;25324;25325;2532…	472;473;783;2198;7361;7362;7366;7368;7371;8675;10057;11368;12164;19093;22411;24871;25324;25325;26932;26937;26944;32146;34877;38120;39519;43744;45548;45551;47076;47084;59735	81;82;83	726	11;29;71	257	Q5HYJ3	Q5HYJ3
sp|Q13740-2|CD166_HUMAN Isoform 2 of CD166 antigen OS=Homo sapiens OX=9606 GN=ALCAM;sp|Q13740|CD166_HUMAN CD166 antigen OS=Homo sapiens OX=9606 GN=ALCAM PE=1 SV=2;tr|F5GXJ9|F5GXJ9_HUMAN CD166 antigen OS=Homo sapiens OX=9606 GN=ALCAM PE=1 SV=1	CD166 antigen	ALCAM	0.673592	0.673581	0.0496716	33.2	41.8	4838000000	7716800000	161270000	257230000	6006400000	6216800000	59	129	6	24	24	24	17	23	17	23	17	23	42.5	42.5	42.5	63.664	570	570;583;532;344;133;305	323.31				1684	962;963;2170;3256;3447;5871;7253;7700;7701;8081;12572;13888;14219;14220;14227;14426;14427;14962;15675;16093;16475;16476;17305;17490	True;True;True;True;True;True;True;True;True;True;True;True;True;True;True;True;True;True;True;True;True;True;True;True	995;996;2253;3388;3389;3599;6116;7561;8031;8032;8430;8431;13255;14652;14653;15004;15005;15012;15217;15218;15771;16525;16962;17353;17354;18214;18403	2860;2861;2862;2863;2864;2865;2866;2867;2868;2869;2870;2871;2872;2873;6371;6372;9689;9690;9691;9692;9693;9694;9695;9696;9697;9698;9699;9700;9701;9702;9703;9704;9705;9706;10375;10376;10377;10378;10379;10380;10381;10382;10383;10384;10385;17761;22060;22061;23495;23496;23497;23498;23499;23500;23501;23502;23503;23504;24690;24691;24692;24693;24694;24695;24696;38779;42962;42963;42964;42965;42966;42967;4…	3099;3100;3101;3102;3103;3104;3105;3106;3107;3108;3109;3110;3111;3112;6787;6788;10339;10340;10341;10342;10343;10344;10345;10346;10347;10348;10349;10350;10351;10352;10353;10354;10355;10356;10357;10358;10359;10360;10361;10362;10363;10364;11065;11066;11067;11068;11069;11070;11071;11072;11073;11074;11075;11076;18969;23710;23711;25383;25384;25385;25386;25387;25388;25389;25390;25391;25392;26651;26652;2…	3101;3107;6787;10362;11071;18969;23710;25384;25389;26655;41726;46169;47274;47279;47303;48030;48036;50063;52661;54192;55344;55352;58099;58708		664;665;666		52;192;321	Q13740-2;Q13740;F5GXJ9;H7C543;Q13740-3;Q13740-4	Q13740-2;Q13740;F5GXJ9
tr|A0A0U1RR32|A0A0U1RR32_HUMAN Histone H2A OS=Homo sapiens OX=9606 GN=hCG_2039566 PE=3 SV=1;tr|A0A0U1RRH7|A0A0U1RRH7_HUMAN Histone H2A OS=Homo sapiens OX=9606 PE=3 SV=1;sp|Q99878|H2A1J_HUMAN Histone H2A type 1-J OS=Homo sapiens OX=9606 GN=HIST1H2AJ PE=1 SV	Histone H2A type 1-J;Histone H2A type 1-H;Histone H2A type 2-A;Histone H2A type 1-D;Histone H2A type 1;Histone H2A.J;Histone H2A type 2-C;Histone H2A	HIST1H2AJ;HIST1H2AH;HIST2H2AA3;HIST1H2AD;HIST1H2AG;H2AFJ;HIST2H2AC	-0.301762	-0.301769	-0.360472	31.4	27.8	6825300000	5537100000	853170000	692140000	7930700000	6177300000	16	30	12	9	7	3	7	8	5	6	2	3	31.4	26	21.9	18.481	169	169;170;128;128;130;130;130;129;129;92;151;140	264.58				211	658;5761;5764;5765;10868;10869;16975;16976;16977	False;False;True;True;True;True;True;True;True	684;6002;6005;6006;11463;11464;11465;17872;17873;17874	1939;1940;1941;1942;1943;1944;17383;17384;17385;17386;17387;17388;17429;17430;17431;17432;17433;17434;17435;17436;17437;17438;17439;17440;17441;17442;17443;17444;17445;17446;17447;33485;33486;33487;33488;33489;33490;33491;33492;33493;33494;33495;33496;33497;33498;52993;52994;52995;52996;52997;52998;52999;53000;53001;53002;53003;53004;53005;53006;53007;53008;53009	2034;2035;2036;2037;2038;2039;2040;2041;2042;18579;18580;18581;18582;18583;18584;18585;18628;18629;18630;18631;18632;18633;18634;18635;18636;18637;18638;18639;18640;18641;18642;18643;18644;18645;18646;18647;36091;36092;36093;36094;36095;36096;36097;36098;36099;36100;36101;36102;36103;36104;36105;36106;36107;57010;57011;57012;57013;57014;57015;57016;57017;57018;57019;57020;57021;57022;57023;57024;…	2040;18581;18633;18640;36097;36107;57025;57037;57040	24;25;26;27		96;100;119;120		A0A0U1RR32;A0A0U1RRH7;Q99878;Q96KK5;Q6FI13;P20671;P0C0S8;Q9BTM1;Q16777;H0YFX9;Q9BTM1-2;A0A3B3IS11	A0A0U1RR32;A0A0U1RRH7;Q99878;Q96KK5;Q6FI13;P20671;P0C0S8;Q9BTM1;Q16777;H0YFX9;Q9BTM1-2
sp|P10412|H14_HUMAN Histone H1.4 OS=Homo sapiens OX=9606 GN=HIST1H1E PE=1 SV=2;sp|P16402|H13_HUMAN Histone H1.3 OS=Homo sapiens OX=9606 GN=HIST1H1D PE=1 SV=2	Histone H1.4;Histone H1.3	HIST1H1E;HIST1H1D	1.97251	1.97255	1.30863	34.7	28.3	1728500000	6783500000	192050000	753720000	2481200000	6146100000	15	40	4	16	16	5	14	14	14	14	5	4	34.7	34.7	16.4	21.865	219	219;221;207;226	182.34				1215	877;878;1444;3407;3408;5472;7177;7178;7192;12664;13212;13213;13214;13215;13438;13439	True;True;True;True;True;True;True;True;True;True;True;True;True;True;True;True	908;909;910;1505;3558;3559;5695;7473;7474;7475;7476;7494;7495;13351;13938;13939;13940;13941;13942;13943;13944;13945;14178;14179	2606;2607;2608;2609;2610;2611;2612;2613;2614;2615;2616;2617;2618;2619;2620;2621;2622;4270;4271;4272;4273;4274;10255;10256;10257;10258;10259;10260;10261;16455;16456;21803;21804;21805;21806;21807;21808;21809;21810;21811;21812;21813;21814;21815;21816;21817;21818;21819;21820;21821;21822;21874;21875;21876;21877;21878;21879;21880;21881;21882;21883;21884;21885;21886;21887;39070;39071;39072;39073;39074;3…	2836;2837;2838;2839;2840;2841;2842;2843;2844;2845;2846;2847;2848;2849;2850;2851;2852;2853;2854;4584;4585;4586;4587;4588;4589;4590;4591;4592;4593;10945;10946;10947;10948;10949;10950;10951;17595;17596;23428;23429;23430;23431;23432;23433;23434;23435;23436;23437;23438;23439;23440;23441;23442;23443;23444;23445;23446;23447;23499;23500;23501;23502;23503;23504;23505;23506;23507;23508;23509;23510;23511;23…	2839;2853;4590;10945;10947;17595;23440;23443;23506;42043;43966;43982;43991;43996;44683;44689	143;144;145;146;147		17;21;34;64;75		P10412;P16402;P22492;P16401	P10412;P16402
sp|Q86UP2|KTN1_HUMAN Kinectin OS=Homo sapiens OX=9606 GN=KTN1 PE=1 SV=1;sp|Q86UP2-4|KTN1_HUMAN Isoform 4 of Kinectin OS=Homo sapiens OX=9606 GN=KTN1;sp|Q86UP2-2|KTN1_HUMAN Isoform 2 of Kinectin OS=Homo sapiens OX=9606 GN=KTN1;sp|Q86UP2-3|KTN1_HUMAN Isoform	Kinectin	KTN1	0.119621	0.119614	-0.739267	56.7	62.7	7271300000	7899900000	87606000	95179000	9788100000	5863500000	153	269	11	98	98	98	65	87	65	87	65	87	66	66	66	156.27	1357	1357;1329;1300;1306;595;334;153;162;160;91;138	323.31				1971	738;868;1009;1317;1348;1352;1672;1894;1945;2122;2692;2693;2694;2996;3026;3027;3053;3145;3146;3361;3387;3405;3415;3573;4015;4430;4702;4703;6225;6282;6421;6422;7451;7452;7635;8757;8759;8760;8771;8772;8859;8860;8861;9200;9201;9372;9506;9577;9602;9847;9956;10633;10634;10635;10813;11643;11836;12030;12031;12037;12191;12230;12240;12242;12275;12318;12319;12390;12391;12825;12900;12910;13191;13435;14191;14…	True;True;True;True;True;True;True;True;True;True;True;True;True;True;True;True;True;True;True;True;True;True;True;True;True;True;True;True;True;True;True;True;True;True;True;True;True;True;True;True;True;True;True;True;True;True;True;True;True;True;True;True;True;True;True;True;True;True;True;True;True;True;True;True;True;True;True;True;True;True;True;True;True;True;True;True;True;True;True;True…	765;899;1045;1375;1406;1410;1738;1971;2025;2205;2801;2802;2803;3118;3149;3150;3181;3275;3276;3507;3535;3556;3566;3731;4188;4618;4902;4903;6484;6541;6542;6689;6690;7771;7772;7965;9141;9143;9144;9156;9157;9245;9246;9247;9598;9599;9600;9601;9785;9923;9924;9996;10021;10271;10382;11188;11189;11190;11405;12275;12478;12679;12680;12686;12847;12891;12902;12904;12938;12987;12988;13064;13065;13521;13601;136…	2151;2152;2153;2586;2587;2588;2589;2590;2591;2592;2593;2991;2992;2993;2994;2995;2996;2997;2998;2999;3000;3001;3899;3900;3901;3902;3903;3904;3905;3906;3907;3985;3986;3987;3996;3997;3998;3999;4000;4943;4944;4945;4946;4947;4948;4949;5585;5586;5587;5761;6262;6263;7901;7902;7903;7904;7905;7906;7907;8836;8837;8838;8839;8840;8841;8945;8946;8947;8948;8949;8950;8951;8952;8953;8954;8955;8956;9097;9098;9099…	2253;2254;2255;2816;2817;2818;2819;2820;2821;2822;2823;3234;3235;3236;3237;3238;3239;3240;3241;3242;3243;3244;4207;4208;4209;4210;4211;4212;4213;4214;4215;4295;4296;4297;4306;4307;4308;4309;4310;5300;5301;5302;5303;5304;5305;5306;5972;5973;5974;6151;6678;6679;8419;8420;8421;8422;8423;8424;8425;9438;9439;9440;9441;9442;9443;9561;9562;9563;9564;9565;9566;9567;9568;9569;9570;9571;9572;9573;9718;9719…	2255;2823;3244;4212;4297;4307;5301;5973;6151;6679;8420;8422;8423;9443;9561;9572;9720;10000;10002;10775;10848;10943;10968;11489;12850;14156;15063;15066;20019;20173;20716;20722;24320;24324;25170;28836;28842;28844;28916;28919;29157;29162;29163;30281;30288;30900;31286;31506;31608;32355;32671;35158;35160;35161;35914;38769;39352;40018;40019;40033;40480;40612;40648;40650;40752;40907;40910;41152;41156;42…		773;774;775;776;777;778		404;406;551;554;569;733	Q86UP2;Q86UP2-4;Q86UP2-2;Q86UP2-3;G3V4Y7;B7Z6P3;H0YJZ8;G3V5G2;G3V5P0;H0YJV5;H0YJP2	Q86UP2;Q86UP2-4;Q86UP2-2;Q86UP2-3
sp|P60709|ACTB_HUMAN Actin, cytoplasmic 1 OS=Homo sapiens OX=9606 GN=ACTB PE=1 SV=1;sp|P63261|ACTG_HUMAN Actin, cytoplasmic 2 OS=Homo sapiens OX=9606 GN=ACTG1 PE=1 SV=1;tr|A0A2R8Y793|A0A2R8Y793_HUMAN Actin, cytoplasmic 1 (Fragment) OS=Homo sapiens OX=9606	Actin, cytoplasmic 1;Actin, cytoplasmic 1, N-terminally processed;Actin, cytoplasmic 2;Actin, cytoplasmic 2, N-terminally processed	ACTB;ACTG1	2.30019	2.30017	1.83007	45.6	53.9	1308000000	6442200000	65401000	322110000	1636800000	5819700000	28	87	25	24	24	8	14	23	14	23	5	8	56.8	56.8	26.1	41.736	375	375;375;309;214;214;333;241;164;163;79;133;125;198;376;165;102;96;1075;1075;1075;157;80;1038;375;52	300.77				1507	626;1649;2244;2258;2437;2438;3000;5629;5630;5805;6290;6291;6401;6402;7089;7215;8035;10621;11875;11876;12613;14486;15554;15878	True;True;True;True;True;True;True;True;True;True;True;True;True;True;True;True;True;True;True;True;True;True;True;True	652;1715;2329;2343;2344;2534;2535;2536;3122;3123;5861;5862;6047;6550;6551;6669;6670;7376;7519;7520;7521;8378;11174;12518;12519;13298;15277;16395;16396;16738	1859;1860;1861;1862;1863;4857;4858;4859;4860;4861;4862;4863;4864;4865;6574;6575;6576;6603;6604;6605;6606;6607;6608;6609;6610;6611;7172;7173;7174;7175;7176;7177;7178;7179;7180;7181;7182;7183;7184;7185;8849;8850;8851;8852;8853;8854;8855;8856;8857;16940;16941;16942;16943;16944;16945;16946;16947;17571;18921;18922;18923;18924;19341;19342;19343;19344;19345;21434;21957;21958;21959;21960;21961;24570;2457…	1952;1953;1954;1955;1956;1957;5210;5211;5212;5213;5214;5215;5216;5217;5218;5219;5220;5221;6990;6991;6992;7019;7020;7021;7022;7023;7024;7025;7026;7027;7640;7641;7642;7643;7644;7645;7646;7647;7648;7649;7650;7651;7652;7653;9451;9452;9453;9454;9455;9456;9457;9458;9459;9460;18105;18106;18107;18108;18109;18110;18111;18112;18772;20205;20206;20207;20208;20665;20666;20667;20668;20669;23038;23598;23599;236…	1953;5217;6992;7021;7642;7648;9453;18107;18112;18772;20205;20208;20666;20668;23038;23600;26525;35124;39488;39491;41861;48204;52205;53473	188;189	584;585;586	61;291	153;305;325	P60709;P63261;A0A2R8Y793;I3L3I0;I3L1U9;P63267-2;I3L4N8;I3L3R2;E7EVS6;A0A2R8YFE2;K7EM38;G5E9R0;J3KT65;Q562R1;A0A2R8YGF8;C9JZR7;C9JUM1;A5A3E0;Q6S8J3;P0CG38;A0A2R8YEA7;C9JTX5;P0CG39;Q9BYX7;F8WCH0	P60709;P63261;A0A2R8Y793;I3L3I0;I3L1U9
sp|Q9HCN8|SDF2L_HUMAN Stromal cell-derived factor 2-like protein 1 OS=Homo sapiens OX=9606 GN=SDF2L1 PE=1 SV=2	Stromal cell-derived factor 2-like protein 1	SDF2L1	-2.31584	-2.31588	-1.5677	61.5	53.8	16555000000	3325000000	1379600000	277080000	16931000000	5711600000	54	35	1	9	9	9	9	5	9	5	9	5	61.5	61.5	61.5	23.598	221	221	323.31				2408	1146;4262;4263;5310;8523;9797;11193;16828;17593	True;True;True;True;True;True;True;True;True	1187;1188;4445;4446;4447;5528;8890;10220;11804;17719;18512	3368;3369;3370;3371;3372;3373;3374;3375;3376;3377;3378;3379;3380;3381;12799;12800;12801;12802;12803;12804;12805;12806;12807;12808;12809;12810;12811;12812;12813;12814;12815;12816;12817;12818;12819;12820;12821;12822;16000;16001;16002;16003;16004;16005;16006;16007;16008;25971;29887;29888;34561;34562;34563;34564;34565;34566;34567;34568;34569;34570;34571;52519;52520;52521;52522;54873;54874;54875;54876…	3630;3631;3632;3633;3634;3635;3636;3637;3638;3639;3640;3641;3642;3643;3644;3645;3646;13648;13649;13650;13651;13652;13653;13654;13655;13656;13657;13658;13659;13660;13661;13662;13663;13664;13665;13666;13667;13668;13669;13670;13671;13672;13673;13674;13675;13676;13677;13678;13679;17121;17122;17123;17124;17125;17126;17127;17128;17129;28043;32224;32225;37238;37239;37240;37241;37242;37243;37244;37245;37…	3640;13650;13672;17124;28043;32224;37238;56506;59013		877;878		191;203	Q9HCN8	Q9HCN8
sp|O43143|DHX15_HUMAN Pre-mRNA-splicing factor ATP-dependent RNA helicase DHX15 OS=Homo sapiens OX=9606 GN=DHX15 PE=1 SV=2	Pre-mRNA-splicing factor ATP-dependent RNA helicase DHX15	DHX15	2.5546	2.5545	1.74457	31.4	44.9	1087700000	6390300000	27891000	163850000	1666100000	5583000000	51	163	5	40	40	40	25	37	25	37	25	37	46.3	46.3	46.3	90.932	795	795;669;1181;1041;1220	250.33				1011	1126;1505;1798;2304;2374;2571;2572;2666;3549;3730;4395;5812;5822;6101;6102;6350;6612;6822;7184;7485;8040;8396;9449;9450;12725;12888;13775;13916;13917;14279;14716;14916;15098;15099;15795;15797;16041;16341;17598;17778	True;True;True;True;True;True;True;True;True;True;True;True;True;True;True;True;True;True;True;True;True;True;True;True;True;True;True;True;True;True;True;True;True;True;True;True;True;True;True;True	1163;1568;1871;2395;2469;2674;2675;2774;2775;3704;3893;4583;6055;6066;6353;6354;6611;6884;6885;7105;7482;7807;7808;7809;8383;8755;9864;9865;13414;13589;14531;14532;14686;14687;15066;15519;15725;15910;15911;15912;16653;16655;16909;17218;18517;18705;18706	3312;3313;3314;3315;4471;4472;5317;5318;5319;5320;5321;5322;6769;6770;6771;6772;6773;6986;6987;6988;6989;6990;7569;7570;7571;7572;7573;7840;7841;7842;7843;7844;7845;7846;10659;10660;10661;10662;10663;10664;11168;11169;11170;11171;11172;11173;11174;11175;11176;11177;13196;13197;13198;17595;17596;17597;17598;17599;17600;17621;17622;17623;17624;18397;18398;18399;18400;18401;19121;19122;19123;19124;1…	3572;3573;3574;3575;4797;4798;4799;5688;5689;5690;5691;5692;5693;5694;7195;7196;7197;7198;7199;7435;7436;7437;7438;7439;8058;8059;8060;8061;8062;8355;8356;8357;8358;8359;8360;8361;8362;8363;8364;11400;11401;11402;11403;11404;11405;11406;11407;11921;11922;11923;11924;11925;11926;11927;11928;11929;11930;14077;14078;14079;18796;18797;18798;18799;18800;18801;18822;18823;18824;18825;19652;19653;19654;…	3575;4797;5693;7199;7436;8059;8062;8355;11407;11924;14077;18796;18825;19656;19658;20438;21309;22229;23464;24455;26540;27645;31104;31113;42200;42814;45770;46288;46295;47516;49300;49933;50539;50546;53156;53161;54057;54952;59041;59597		330;331;332;333;334;335;336;337		236;240;246;273;528;537;655;668	O43143;A0A140T947;F5H658;O60231;Q14562	O43143
sp|O95573|ACSL3_HUMAN Long-chain-fatty-acid--CoA ligase 3 OS=Homo sapiens OX=9606 GN=ACSL3 PE=1 SV=3	Long-chain-fatty-acid--CoA ligase 3	ACSL3	0.796423	0.79642	0.363017	42.8	47.8	3279500000	5695800000	99379000	172600000	3983400000	5123100000	72	126	6	34	34	34	26	31	26	31	26	31	50	50	50	80.419	720	720;88;95;141;670;711	323.31				1122	232;506;866;1471;3152;3223;3590;4677;4695;4696;4971;5551;5719;6231;6809;7339;7760;8680;8734;9369;9370;9686;10565;11181;11644;11734;13749;14932;15030;16308;16582;16583;16584;16857	True;True;True;True;True;True;True;True;True;True;True;True;True;True;True;True;True;True;True;True;True;True;True;True;True;True;True;True;True;True;True;True;True;True	244;531;897;1532;1533;3282;3355;3748;4876;4894;4895;4896;5175;5176;5779;5957;6490;7091;7652;8093;9061;9118;9782;9783;10105;11101;11102;11792;12276;12371;14504;15741;15840;17184;17462;17463;17464;17749;17750	723;724;725;1538;1539;1540;1541;1542;1543;1544;2582;4358;4359;4360;4361;4362;4363;4364;4365;4366;4367;4368;4369;4370;4371;9387;9601;9602;10788;10789;10790;10791;10792;14034;14035;14036;14037;14038;14039;14040;14092;14093;14094;14095;14096;14097;14098;14099;14100;14101;14916;14917;14918;14919;14920;14921;14922;14923;16682;16683;16684;16685;16686;16687;16688;17263;17264;17265;17266;17267;17268;1875…	772;773;774;1623;1624;1625;1626;1627;1628;1629;2812;4683;4684;4685;4686;4687;4688;4689;4690;4691;4692;4693;4694;4695;4696;10015;10249;10250;11533;11534;11535;11536;11537;14983;14984;14985;14986;14987;14988;14989;14990;14991;14992;15046;15047;15048;15049;15050;15051;15052;15053;15054;15055;15932;15933;15934;15935;15936;15937;15938;15939;17834;17835;17836;17837;17838;17839;17840;18457;18458;18459;1…	773;1624;2812;4691;10015;10250;11537;14986;15050;15055;15937;17839;18460;20040;22192;23967;25620;28568;28728;30883;30891;31853;34854;37198;38773;39107;45685;49985;50302;54865;55704;55716;55717;56599	126	377;378;379;380;381;382	13	1;12;256;268;401;537	O95573;C9JC11;F5H062;F5GWH2;O60488-2;O60488	O95573
sp|P19338|NUCL_HUMAN Nucleolin OS=Homo sapiens OX=9606 GN=NCL PE=1 SV=3;tr|H7BY16|H7BY16_HUMAN Nucleolin (Fragment) OS=Homo sapiens OX=9606 GN=NCL PE=1 SV=8	Nucleolin	NCL	5.81141	5.8114	5.51788	9	38.6	94162000	5287900000	2690300	151080000	111200000	5095100000	9	116	2	38	38	38	5	37	5	37	5	37	38.6	38.6	38.6	76.613	710	710;296	323.31				1279	800;948;1548;2664;2665;3562;3954;3955;4749;4750;4945;4946;4947;5170;5592;7082;7279;7280;7636;8152;10877;11239;11240;12041;13562;13563;13599;13600;14686;14687;14744;14846;14847;15261;16013;16085;16982;17007	True;True;True;True;True;True;True;True;True;True;True;True;True;True;True;True;True;True;True;True;True;True;True;True;True;True;True;True;True;True;True;True;True;True;True;True;True;True	828;981;1611;2771;2772;2773;3718;4127;4128;4950;4951;5149;5150;5151;5381;5821;7369;7589;7590;7966;8503;11473;11851;11852;12690;14306;14307;14343;14344;15489;15490;15550;15653;15654;15655;16084;16879;16954;17879;17906	2314;2315;2823;2824;2825;4582;4583;7832;7833;7834;7835;7836;7837;7838;7839;10702;10703;11894;11895;11896;11897;14248;14249;14250;14251;14252;14253;14840;14841;14842;14843;14844;14845;14846;15553;15554;15555;15556;15557;15558;15559;15560;15561;16803;16804;21423;22164;22165;22166;22167;22168;22169;22170;23294;23295;23296;23297;24868;33517;33518;33519;33520;33521;33522;34692;34693;34694;34695;34696;…	2424;2425;3061;3062;3063;4917;4918;8347;8348;8349;8350;8351;8352;8353;8354;11445;11446;12699;12700;12701;12702;12703;15218;15219;15220;15221;15222;15223;15224;15856;15857;15858;15859;15860;15861;15862;16626;16627;16628;16629;16630;16631;16632;16633;16634;17959;17960;23025;23825;23826;23827;23828;23829;23830;23831;25171;25172;25173;25174;25175;26834;36126;36127;36128;36129;36130;36131;37380;37381;…	2425;3062;4918;8347;8351;11446;12699;12702;15223;15224;15858;15859;15862;16634;17960;23025;23826;23831;25172;26834;36131;37380;37382;40038;45074;45076;45226;45229;49218;49222;49415;49673;49678;51209;53936;54165;57061;57143	159	469	333	630	P19338;H7BY16	P19338;H7BY16
sp|Q96S55-2|WRIP1_HUMAN Isoform 2 of ATPase WRNIP1 OS=Homo sapiens OX=9606 GN=WRNIP1;sp|Q96S55|WRIP1_HUMAN ATPase WRNIP1 OS=Homo sapiens OX=9606 GN=WRNIP1 PE=1 SV=2;sp|Q96S55-3|WRIP1_HUMAN Isoform 3 of ATPase WRNIP1 OS=Homo sapiens OX=9606 GN=WRNIP1;sp|Q96	ATPase WRNIP1	WRNIP1	10.397	10.397	#NUM!	1.9	42.5	3960800	5340700000	132030	178020000	0	5039500000	1	96	4	24	24	24	1	24	1	24	1	24	42.5	42.5	42.5	69.458	640	640;665;445;281	297.76				2265	657;790;879;1639;1658;4478;5380;7722;8620;9187;9355;10464;11009;12222;13488;14971;14972;15296;15564;15565;16492;16493;17808;17809	True;True;True;True;True;True;True;True;True;True;True;True;True;True;True;True;True;True;True;True;True;True;True;True	683;818;911;1704;1724;4668;5600;8053;8994;9582;9767;10979;10980;11611;12882;14230;15780;15781;16125;16408;16409;17371;17372;18737;18738;18739	1936;1937;1938;2290;2291;2292;2293;2294;2623;2624;4825;4826;4827;4828;4829;4897;4898;4899;13387;13388;13389;16206;16207;16208;23588;23589;23590;26278;26279;26280;28049;28050;28566;28567;28568;32016;32017;32018;32019;32020;32021;32022;33943;33944;33945;33946;37706;37707;37708;37709;41728;41729;41730;41731;46542;46543;46544;46545;46546;46547;46548;46549;47670;47671;47672;47673;47674;47675;48561;485…	2031;2032;2033;2400;2401;2402;2403;2404;2855;2856;5178;5179;5180;5181;5182;5253;5254;5255;14274;14275;14276;17333;17334;17335;25494;25495;25496;28359;28360;28361;28362;28363;28364;30229;30230;30832;30833;30834;34498;34499;34500;34501;34502;34503;34504;34505;36578;36579;36580;36581;40587;40588;40589;40590;44872;44873;44874;44875;50094;50095;50096;50097;50098;50099;50100;50101;50102;50103;51312;513…	2033;2401;2856;5181;5253;14274;17333;25494;28361;30229;30834;34505;36581;40590;44873;50097;50102;51316;52255;52257;55403;55405;59689;59693		846;847		500;615	Q96S55-2;Q96S55;Q96S55-3;Q96S55-4	Q96S55-2;Q96S55;Q96S55-3;Q96S55-4
sp|Q15427|SF3B4_HUMAN Splicing factor 3B subunit 4 OS=Homo sapiens OX=9606 GN=SF3B4 PE=1 SV=1;tr|Q5SZ64|Q5SZ64_HUMAN Splicing factor 3B subunit 4 (Fragment) OS=Homo sapiens OX=9606 GN=SF3B4 PE=1 SV=1	Splicing factor 3B subunit 4	SF3B4	1.29616	1.29619	0.207002	25.5	27.8	2857500000	7017300000	178590000	438580000	4364600000	5038000000	32	55	2	13	13	13	11	10	11	10	11	10	31.8	31.8	31.8	44.385	424	424;190	323.31				1751	85;2385;6630;9158;10072;11157;11405;11406;11407;16858;16859;16971;16972	True;True;True;True;True;True;True;True;True;True;True;True;True	87;2481;6906;9550;10502;11767;12026;12027;12028;12029;17751;17752;17753;17754;17868;17869	230;231;232;233;234;7017;7018;7019;7020;7021;7022;20024;20025;20026;27955;27956;27957;30623;34437;34438;34439;34440;34441;34442;34443;34444;35193;35194;35195;35196;35197;35198;35199;35200;35201;35202;35203;35204;35205;35206;35207;52612;52613;52614;52615;52616;52617;52618;52619;52620;52621;52622;52623;52624;52967;52968;52969;52970;52971;52972;52973;52974;52975;52976;52977;52978;52979;52980;52981;5…	236;237;238;239;240;241;7466;7467;7468;7469;7470;7471;21387;21388;21389;30133;30134;30135;32986;37107;37108;37109;37110;37111;37112;37113;37114;37904;37905;37906;37907;37908;37909;37910;37911;37912;37913;37914;37915;37916;37917;37918;37919;37920;56605;56606;56607;56608;56609;56610;56611;56612;56613;56614;56615;56616;56617;56976;56977;56978;56979;56980;56981;56982;56983;56984;56985;56986;56987;569…	241;7469;21387;30134;32986;37114;37907;37912;37917;56610;56612;56989;57005		704;705		44;76	Q15427;Q5SZ64	Q15427;Q5SZ64
sp|P27824|CALX_HUMAN Calnexin OS=Homo sapiens OX=9606 GN=CANX PE=1 SV=2;sp|P27824-2|CALX_HUMAN Isoform 2 of Calnexin OS=Homo sapiens OX=9606 GN=CANX;sp|P27824-3|CALX_HUMAN Isoform 3 of Calnexin OS=Homo sapiens OX=9606 GN=CANX	Calnexin	CANX	-0.19452	-0.194556	-0.264186	43.1	33.3	5456000000	4767800000	170500000	148990000	5865000000	4883600000	70	111	13	30	30	30	22	25	22	25	22	25	44.6	44.6	44.6	67.567	592	592;627;484;170;134;144;168;308;131;107;189;78;96	323.31				1322	329;848;1265;1266;2945;5061;5191;5486;6706;7022;7023;7206;7395;7597;9094;9315;11738;12036;12660;12777;14848;14909;15356;15357;15400;17036;17037;17255;17299;17461	True;True;True;True;True;True;True;True;True;True;True;True;True;True;True;True;True;True;True;True;True;True;True;True;True;True;True;True;True;True	346;879;1320;1321;3065;5269;5270;5403;5710;6984;7308;7309;7509;7712;7926;9486;9723;9724;12375;12685;13347;13471;15656;15718;16187;16188;16189;16235;17935;17936;18162;18207;18208;18374	1036;1037;1038;1039;1040;2534;2535;2536;3748;3749;3750;3751;3752;3753;3754;3755;3756;3757;3758;8663;8664;8665;8666;8667;8668;8669;8670;15243;15244;15245;15246;15612;15613;15614;16495;16496;16497;16498;16499;16500;20278;20279;21257;21258;21259;21260;21261;21262;21263;21264;21265;21266;21267;21268;21269;21270;21920;21921;22474;22475;22476;22477;22478;22479;22480;22481;22482;22483;22484;22485;22486;…	1114;1115;1116;1117;1118;2763;2764;2765;4051;4052;4053;4054;4055;4056;4057;4058;4059;4060;4061;4062;4063;4064;9263;9264;9265;9266;9267;9268;9269;9270;16304;16305;16306;16307;16687;16688;16689;16690;17635;17636;17637;17638;17639;17640;21662;21663;21664;22834;22835;22836;22837;22838;22839;22840;22841;22842;22843;22844;22845;22846;22847;23555;23556;24145;24146;24147;24148;24149;24150;24151;24152;241…	1117;2765;4051;4063;9266;16305;16688;17640;21662;22835;22844;23556;24157;25056;29922;30625;39113;40028;42032;42394;49683;49870;51503;51516;51664;57220;57228;57940;58079;58601		481;482;483		123;188;387	P27824;P27824-2;P27824-3;H0Y9Q7;D6RAU8;D6RB85;D6RDP7;D6RGY2;D6RFL1;D6RAQ8;H0Y9H1;D6RHJ3;D6RD16	P27824;P27824-2;P27824-3
tr|A0A0C4DGS1|A0A0C4DGS1_HUMAN Dolichyl-diphosphooligosaccharide--protein glycosyltransferase 48 kDa subunit OS=Homo sapiens OX=9606 GN=DDOST PE=1 SV=1;sp|P39656-3|OST48_HUMAN Isoform 3 of Dolichyl-diphosphooligosaccharide--protein glycosyltransferase 48 k	Dolichyl-diphosphooligosaccharide--protein glycosyltransferase 48 kDa subunit	DDOST	2.21841	2.21844	1.4146	31.4	40.5	1186900000	5523600000	51604000	240160000	1828900000	4875600000	29	50	5	12	12	12	10	12	10	12	10	12	40.5	40.5	40.5	48.799	439	439;438;456;419;154	272.76				170	3505;4728;5539;9306;11563;14208;14551;14635;15260;17397;17402;17908	True;True;True;True;True;True;True;True;True;True;True;True	3659;4929;5765;5766;9714;12191;14992;15345;15430;16083;18310;18315;18843	10549;10550;10551;10552;10553;10554;14186;14187;14188;14189;14190;14191;16643;16644;16645;16646;16647;16648;16649;16650;16651;28401;28402;28403;28404;35692;35693;35694;35695;35696;35697;43993;43994;43995;43996;43997;43998;45327;45328;45329;45330;45331;45532;47563;47564;47565;54309;54310;54311;54312;54313;54314;54315;54316;54317;54318;54329;54330;54331;54332;54333;54334;55801;55802;55803;55804;558…	11287;11288;11289;11290;11291;11292;15152;15153;15154;15155;15156;15157;17793;17794;17795;17796;17797;17798;17799;17800;17801;17802;30591;30592;30593;30594;30595;30596;38434;38435;38436;38437;38438;38439;38440;47239;47240;47241;47242;47243;47244;47245;47246;48799;48800;48801;48802;48803;49012;51204;51205;51206;58421;58422;58423;58424;58425;58426;58427;58428;58429;58430;58441;58442;58443;58444;584…	11291;15156;17801;30596;38438;47243;48801;49012;51204;58427;58448;59986		40		185	A0A0C4DGS1;P39656-3;P39656;P39656-2;U3KQ84	A0A0C4DGS1;P39656-3;P39656;P39656-2;U3KQ84
tr|U3KQK0|U3KQK0_HUMAN Histone H2B OS=Homo sapiens OX=9606 GN=HIST1H2BN PE=1 SV=1;sp|Q99880|H2B1L_HUMAN Histone H2B type 1-L OS=Homo sapiens OX=9606 GN=HIST1H2BL PE=1 SV=3;sp|Q99879|H2B1M_HUMAN Histone H2B type 1-M OS=Homo sapiens OX=9606 GN=HIST1H2BM PE=1	Histone H2B;Histone H2B type 1-L;Histone H2B type 1-M;Histone H2B type 1-N;Histone H2B type 1-H;Histone H2B type 2-F;Histone H2B type 1-C/E/F/G/I;Histone H2B type 1-D;Histone H2B type F-S;Histone H2B type 1-K;Histone H2B type 1-A	HIST1H2BN;HIST1H2BL;HIST1H2BM;HIST1H2BH;HIST2H2BF;HIST1H2BC;HIST1H2BD;H2BFS;HIST1H2BK;HIST1H2BA	2.26449	2.26444	-0.492481	34.3	39.2	2142000000	10292000000	267760000	1286500000	6773900000	4814900000	24	46	13	9	9	3	7	9	7	9	2	3	39.2	39.2	7.2	18.804	166	166;126;126;126;126;126;126;126;126;126;134;127;122	156.1				1052	1153;2991;3485;7263;8979;8980;12439;14117;16500	True;True;True;True;True;True;True;True;True	1198;1199;1200;3113;3639;7572;9367;9368;13113;14896;17379	3407;3408;3409;3410;3411;3412;3413;3414;3415;3416;3417;3418;3419;3420;3421;3422;3423;3424;3425;3426;3427;3428;3429;3430;3431;3432;8810;8811;8812;8813;8814;8815;10504;10505;22095;22096;22097;22098;22099;27370;27371;27372;27373;27374;27375;27376;38374;38375;38376;38377;38378;38379;38380;43710;43711;43712;43713;51504;51505;51506;51507	3672;3673;3674;3675;3676;3677;3678;3679;3680;3681;3682;3683;3684;3685;3686;3687;3688;3689;3690;3691;3692;3693;3694;3695;3696;3697;3698;3699;3700;3701;3702;3703;3704;3705;9412;9413;9414;9415;9416;9417;11237;11238;11239;23751;23752;23753;23754;23755;29512;29513;29514;29515;29516;29517;29518;29519;29520;41301;41302;41303;41304;41305;41306;41307;46940;46941;46942;46943;55425;55426;55427;55428	3703;9415;11237;23755;29516;29520;41301;46941;55427	120	351;352	109	60;63	U3KQK0;Q99880;Q99879;Q99877;Q93079;Q5QNW6;P62807;P58876;P57053;O60814;Q5QNW6-2;Q96A08;A0A2R8Y619	U3KQK0;Q99880;Q99879;Q99877;Q93079;Q5QNW6;P62807;P58876;P57053;O60814;Q5QNW6-2;Q96A08
sp|Q9Y262|EIF3L_HUMAN Eukaryotic translation initiation factor 3 subunit L OS=Homo sapiens OX=9606 GN=EIF3L PE=1 SV=1;tr|B0QY89|B0QY89_HUMAN Eukaryotic translation initiation factor 3 subunit L OS=Homo sapiens OX=9606 GN=EIF3L PE=1 SV=1;sp|Q9Y262-2|EIF3L_H	Eukaryotic translation initiation factor 3 subunit L	EIF3L	0.756548	0.756546	0.0217955	49.1	55.7	3493400000	5901900000	120460000	203510000	4651100000	4721900000	66	101	8	30	30	30	25	26	25	26	25	26	58.7	58.7	58.7	66.726	564	564;607;516;466;150;183;127;109	323.31				2578	4161;5981;6765;7094;7095;7679;7873;8524;10112;10482;10937;11565;11981;12088;12500;12501;12914;13139;14514;15609;15693;15694;16115;16443;16875;16924;16925;17174;17177;17551	True;True;True;True;True;True;True;True;True;True;True;True;True;True;True;True;True;True;True;True;True;True;True;True;True;True;True;True;True;True	4338;6229;7045;7381;7382;8010;8208;8891;10542;10543;11005;11534;12193;12630;12742;13178;13179;13616;13855;15307;15308;16456;16457;16543;16544;16984;17321;17770;17821;17822;18080;18083;18467	12513;12514;12515;12516;12517;12518;12519;12520;12521;18057;18058;18059;18060;20509;20510;20511;20512;21445;21446;21447;21448;21449;21450;21451;23423;23424;23425;23426;23427;23428;23429;23430;23431;24084;24085;24086;24087;24088;24089;25972;25973;25974;25975;25976;25977;25978;25979;30721;30722;30723;30724;30725;32101;33690;33691;33692;33693;33694;33695;33696;33697;33698;35701;37001;37002;37003;370…	13344;13345;13346;13347;13348;13349;13350;13351;13352;19272;19273;19274;19275;22057;22058;22059;22060;23049;23050;23051;23052;23053;23054;23055;23056;25302;25303;25304;25305;25306;25307;25308;25309;25310;26025;26026;26027;26028;26029;26030;28044;28045;28046;28047;28048;28049;28050;28051;33086;33087;33088;33089;33090;34592;36309;36310;36311;36312;36313;36314;36315;36316;36317;38444;39861;39862;398…	13351;19273;22060;23049;23055;25308;26025;28050;33086;34592;36309;38444;39864;40223;41500;41504;42908;43663;48687;52425;52706;52714;54277;55251;56684;56831;56833;57684;57717;58893		939;940;941;942		25;268;359;470	Q9Y262;B0QY89;Q9Y262-2;B0QY90;C9JHP4;C9K0Q7;H7C3A0;H0Y7E6	Q9Y262;B0QY89;Q9Y262-2;B0QY90
sp|Q96AG4|LRC59_HUMAN Leucine-rich repeat-containing protein 59 OS=Homo sapiens OX=9606 GN=LRRC59 PE=1 SV=1	Leucine-rich repeat-containing protein 59	LRRC59	0.8574	0.857387	-0.30037	33.9	39.1	3461200000	6270900000	247230000	447920000	5594400000	4542900000	31	71	2	16	16	16	11	14	11	14	11	14	40.4	40.4	40.4	34.93	307	307;62	323.31				2192	684;1705;2116;2117;4871;4872;5656;8026;9486;9961;9962;10007;11113;12626;12710;17311	True;True;True;True;True;True;True;True;True;True;True;True;True;True;True;True	710;1772;2199;2200;5075;5076;5890;8369;9903;10387;10388;10436;11719;13312;13399;18220	2001;2002;5049;6241;6242;6243;6244;6245;6246;6247;6248;6249;6250;6251;6252;14622;14623;14624;14625;14626;14627;14628;14629;14630;14631;14632;14633;14634;17042;24531;24532;24533;28949;28950;28951;28952;28953;28954;30337;30338;30339;30340;30341;30342;30343;30344;30345;30346;30347;30348;30349;30350;30351;30352;30454;30455;30456;30457;30458;30459;30460;30461;34285;34286;34287;34288;34289;34290;34291;…	2100;2101;5409;6653;6654;6655;6656;6657;6658;6659;6660;6661;6662;6663;6664;6665;6666;6667;6668;15618;15619;15620;15621;15622;15623;15624;15625;15626;15627;15628;15629;15630;15631;15632;18225;26484;26485;26486;31223;31224;31225;31226;31227;31228;32690;32691;32692;32693;32694;32695;32696;32697;32698;32699;32700;32701;32702;32703;32704;32705;32811;32812;32813;32814;32815;32816;32817;32818;32819;3693…	2101;5409;6653;6657;15622;15628;18225;26484;31226;32697;32703;32817;36941;41918;42163;58131					Q96AG4;I3L223	Q96AG4
sp|Q9Y6C9|MTCH2_HUMAN Mitochondrial carrier homolog 2 OS=Homo sapiens OX=9606 GN=MTCH2 PE=1 SV=1	Mitochondrial carrier homolog 2	MTCH2	1.75181	1.75181	1.27813	38.3	38.9	1400700000	4717300000	100050000	336950000	1857500000	4504900000	26	53	1	12	12	4	10	11	10	11	3	3	38.9	38.9	14.5	33.331	303	303	282.06				2640	212;3623;3624;5104;5247;5248;12614;12935;13902;16491;16563;16564	True;True;True;True;True;True;True;True;True;True;True;True	218;219;3782;3783;5313;5463;5464;13299;13637;14671;14672;17370;17443;17444	592;593;594;595;596;597;598;599;600;601;10873;10874;10875;10876;10877;10878;10879;10880;10881;10882;10883;10884;10885;10886;15373;15374;15375;15376;15377;15378;15795;15796;15797;15798;15799;15800;15801;38908;38909;38910;38911;39954;39955;39956;39957;39958;39959;39960;43032;43033;43034;43035;51474;51475;51476;51477;51478;51479;51480;51699;51700;51701;51702;51703;51704;51705;51706;51707;51708;51709…	631;632;633;634;635;636;637;638;639;640;11619;11620;11621;11622;11623;11624;11625;11626;11627;11628;11629;11630;11631;11632;16436;16437;16438;16439;16440;16441;16893;16894;16895;16896;16897;16898;16899;41862;41863;41864;41865;42983;42984;42985;42986;42987;42988;42989;46231;46232;46233;46234;55392;55393;55394;55395;55396;55397;55398;55399;55400;55401;55635;55636;55637;55638;55639;55640;55641;55642…	636;11623;11631;16440;16898;16899;41865;42989;46233;55398;55644;55651		215;216		22;149	Q9Y6C9	Q9Y6C9
tr|C9JIJ6|C9JIJ6_HUMAN Glutaminase kidney isoform, mitochondrial (Fragment) OS=Homo sapiens OX=9606 GN=GLS PE=1 SV=1;tr|B8ZZA8|B8ZZA8_HUMAN Glutaminase kidney isoform, mitochondrial OS=Homo sapiens OX=9606 GN=GLS PE=1 SV=1		GLS	#NUM!	#NUM!	#NUM!	0	9.8	0	4556900000	0	650980000	0	4477000000	0	17	2	1	1	1	0	1	0	1	0	1	9.8	9.8	9.8	17.951	164	164;169	1.8225				413	177	TRUE	183	510;511;512;513;514;515	527;528;529;530;531;532;533;534;535;536;537;538;539;540;541;542;543	530					C9JIJ6;B8ZZA8	C9JIJ6;B8ZZA8
tr|A0A087WVQ6|A0A087WVQ6_HUMAN Clathrin heavy chain OS=Homo sapiens OX=9606 GN=CLTC PE=1 SV=1;sp|Q00610-2|CLH1_HUMAN Isoform 2 of Clathrin heavy chain 1 OS=Homo sapiens OX=9606 GN=CLTC;sp|Q00610|CLH1_HUMAN Clathrin heavy chain 1 OS=Homo sapiens OX=9606 GN=	Clathrin heavy chain;Clathrin heavy chain 1	CLTC	3.07887	3.07888	1.45613	19.3	37.8	644650000	5447000000	7162700	60522000	1596300000	4379800000	48	170	14	60	60	60	26	58	26	58	26	58	39.3	39.3	39.3	192.06	1679	1679;1639;1675;612;1583;1640;1260;222;122;97;369;463;131;169	323.31				49	222;502;722;736;940;941;1316;1386;1695;1783;2630;2631;2885;2918;3486;4154;5304;5894;6856;6857;7053;7115;7216;7270;7284;7758;7772;7852;7969;8143;8144;8496;8728;8882;8981;9162;10423;10646;11202;11252;11253;11343;11361;12044;12147;12668;12797;14361;14413;15204;15485;15874;15947;16154;16218;16387;16919;17071;17072;17319	True;True;True;True;True;True;True;True;True;True;True;True;True;True;True;True;True;True;True;True;True;True;True;True;True;True;True;True;True;True;True;True;True;True;True;True;True;True;True;True;True;True;True;True;True;True;True;True;True;True;True;True;True;True;True;True;True;True;True;True	229;527;749;763;973;974;1374;1445;1762;1854;2735;2736;2999;3035;3640;4331;5522;6140;7140;7141;7339;7403;7522;7579;7594;8091;8106;8187;8310;8494;8495;8861;9111;9269;9369;9554;10925;11203;11813;11866;11867;11964;11982;12693;12802;13355;13492;15149;15204;16023;16321;16734;16807;17023;17089;17264;17816;17971;17972;17973;18228	622;623;624;625;1528;1529;1530;2106;2143;2144;2145;2146;2147;2800;2801;2802;2803;2804;2805;2806;2807;2808;2809;3896;3897;3898;4104;4105;5024;5025;5259;5260;5261;5262;7742;7743;7744;8415;8416;8417;8552;10506;10507;10508;10509;12489;12490;12491;12492;15984;15985;15986;15987;15988;15989;17825;17826;17827;17828;20757;20758;20759;20760;20761;20762;20763;21340;21341;21342;21343;21517;21518;21519;21520;…	663;664;665;666;667;1613;1614;1615;2207;2245;2246;2247;2248;2249;3038;3039;3040;3041;3042;3043;3044;3045;3046;3047;4204;4205;4206;4418;4419;5384;5385;5627;5628;5629;5630;8257;8258;8259;8998;8999;9000;9147;11240;11241;11242;11243;11244;11245;11246;13319;13320;13321;13322;17105;17106;17107;17108;17109;17110;19035;19036;19037;19038;22313;22314;22315;22316;22317;22318;22319;22939;22940;22941;22942;23…	665;1615;2207;2245;3039;3044;4205;4418;5384;5629;8257;8259;9000;9147;11243;13322;17107;19038;22313;22318;22939;23127;23605;23787;23839;25613;25678;25941;26305;26816;26817;27964;28715;29227;29524;30148;34312;35198;37273;37429;37435;37740;37796;40044;40360;42053;42480;47791;47982;50921;51975;53456;53709;54375;54537;55102;56811;57331;57335;58163		17		185	A0A087WVQ6;Q00610-2;Q00610;J3KS13;P53675-2;P53675;A0A087WX41;K7EJJ5;J3KSQ2;J3QL20;A0A087WV74;A0A087WXH4;J3KRF5;F5H5N6	A0A087WVQ6;Q00610-2;Q00610
sp|P14866|HNRPL_HUMAN Heterogeneous nuclear ribonucleoprotein L OS=Homo sapiens OX=9606 GN=HNRNPL PE=1 SV=2;tr|M0QXS5|M0QXS5_HUMAN Heterogeneous nuclear ribonucleoprotein L (Fragment) OS=Homo sapiens OX=9606 GN=HNRNPL PE=1 SV=1;sp|P14866-2|HNRPL_HUMAN Isof	Heterogeneous nuclear ribonucleoprotein L	HNRNPL	-0.976324	-0.976263	-0.665839	48	41.4	6956300000	3535700000	347810000	176790000	6837300000	4309700000	70	69	8	23	23	6	21	17	21	17	5	3	49.9	49.9	17.1	64.132	589	589;530;456;321;114;179;220;198	323.31				1246	812;4371;6083;6910;8754;9290;10366;10885;10991;11360;11390;12345;13036;13037;13619;14245;14246;14247;14671;17586;18001;18002;18003	True;True;True;True;True;True;True;True;True;True;True;True;True;True;True;True;True;True;True;True;True;True;True	840;841;4558;6335;7194;9138;9697;10856;11482;11588;11981;12011;13019;13740;13741;13742;14364;14365;14366;15031;15032;15033;15034;15471;18504;18505;18937;18938;18939	2340;2341;2342;2343;2344;2345;2346;2347;2348;2349;2350;2351;2352;13125;13126;13127;13128;13129;18347;18348;18349;18350;20926;26725;26726;26727;28341;28342;28343;28344;28345;28346;28347;28348;28349;31595;31596;33551;33552;33553;33554;33555;33855;33856;33857;33858;33859;35083;35084;35085;35086;35087;35155;35156;35157;35158;35159;38119;38120;38121;40240;40241;40242;40243;40244;40245;40246;40247;4024…	2450;2451;2452;2453;2454;2455;2456;2457;2458;2459;2460;2461;2462;14002;14003;14004;14005;14006;14007;14008;14009;19599;19600;19601;19602;22497;28830;28831;28832;30526;30527;30528;30529;30530;30531;30532;30533;30534;34042;34043;36162;36163;36164;36165;36166;36481;36482;36483;36484;36485;37790;37791;37792;37793;37794;37866;37867;37868;37869;37870;41034;41035;41036;43282;43283;43284;43285;43286;4328…	2462;14002;19602;22497;28832;30534;34042;36166;36484;37793;37867;41035;43292;43298;45288;47369;47376;47379;49138;58991;60244;60250;60257		102;103;104;105;106		385;423;426;444;567	P14866;M0QXS5;P14866-2;M0QYT0;M0R076;B4DVF8;M0R1W6;M0QYL7	P14866;M0QXS5;P14866-2
sp|P62805|H4_HUMAN Histone H4 OS=Homo sapiens OX=9606 GN=HIST1H4A PE=1 SV=2	Histone H4	HIST1H4A	0.603383	0.603313	-0.483219	68	68.9	4054500000	6159900000	675750000	1026600000	5969000000	4270100000	43	59	1	16	16	16	12	15	12	15	12	15	68.9	68.9	68.9	11.367	103	103	115.03				1544	1895;2296;2297;6862;6863;7734;7735;12657;12687;15263;15707;15708;16096;16097;16098;16578	True;True;True;True;True;True;True;True;True;True;True;True;True;True;True;True	1972;2387;2388;7146;7147;8066;8067;13344;13375;16086;16561;16562;16563;16564;16965;16966;16967;17458	5588;5589;5590;5591;5592;5593;6742;6743;6744;6745;6746;6747;6748;6749;6750;6751;6752;6753;6754;6755;6756;6757;6758;6759;20769;20770;20771;20772;20773;20774;20775;20776;20777;20778;20779;23614;23615;23616;23617;23618;23619;23620;23621;23622;39052;39053;39054;39128;39129;47572;47573;49111;49112;49113;49114;49115;49116;49117;49118;49119;49120;49121;49122;49123;49124;49125;49126;49127;49128;49129;491…	5975;5976;5977;5978;5979;5980;7167;7168;7169;7170;7171;7172;7173;7174;7175;7176;7177;7178;7179;7180;7181;7182;7183;7184;7185;22325;22326;22327;22328;22329;22330;22331;22332;22333;22334;22335;22336;25521;25522;25523;25524;25525;25526;25527;25528;25529;42020;42021;42022;42096;42097;51213;51214;52866;52867;52868;52869;52870;52871;52872;52873;52874;52875;52876;52877;52878;52879;52880;52881;52882;5288…	5979;7172;7179;22327;22336;25521;25528;42022;42096;51213;52866;52892;54202;54210;54216;55684		592		85	P62805	P62805
sp|Q8N1F7|NUP93_HUMAN Nuclear pore complex protein Nup93 OS=Homo sapiens OX=9606 GN=NUP93 PE=1 SV=2;tr|H3BVG0|H3BVG0_HUMAN Nuclear pore complex protein Nup93 OS=Homo sapiens OX=9606 GN=NUP93 PE=1 SV=1;sp|Q8N1F7-2|NUP93_HUMAN Isoform 2 of Nuclear pore compl	Nuclear pore complex protein Nup93	NUP93	1.30508	1.30504	0.585269	41.9	49.2	2060400000	5091200000	40401000	99827000	2824600000	4237800000	59	128	14	44	44	44	28	39	28	39	28	39	57	57	57	93.487	819	819;880;696;178;151;136;132;156;229;117;125;140;84;40	323.31				2024	429;1092;1512;1923;2288;2655;2656;2657;2784;2785;3448;4421;5078;5098;5788;6506;7601;8198;8199;8733;8997;9101;9102;9683;9812;9969;9982;10222;10806;10908;11244;11305;11679;11775;12017;12231;12232;13555;14197;14751;15153;15733;15896;16271	True;True;True;True;True;True;True;True;True;True;True;True;True;True;True;True;True;True;True;True;True;True;True;True;True;True;True;True;True;True;True;True;True;True;True;True;True;True;True;True;True;True;True;True	452;1129;1575;2002;2379;2762;2763;2764;2894;2895;3600;4609;5287;5307;6030;6774;7930;8551;8552;9117;9385;9493;9494;10102;10236;10395;10408;10409;10672;10673;11396;11397;11505;11856;11922;12312;12415;12666;12892;12893;12894;14299;14981;15557;15558;15970;15971;16589;16756;17144	1323;1324;3230;4487;4488;4489;5701;5702;5703;6719;6720;6721;6722;7807;7808;7809;7810;8150;8151;8152;8153;10386;10387;10388;10389;13253;13254;13255;13256;13257;15282;15283;15284;15285;15286;15287;15288;15289;15352;17521;19636;19637;19638;19639;19640;19641;19642;19643;19644;23201;23202;24981;24982;24983;24984;24985;24986;24987;24988;26632;26633;26634;27437;27438;27439;27769;27770;27771;27772;27773;…	1403;1404;3488;4814;4815;4816;6090;6091;6092;7144;7145;7146;7147;8322;8323;8324;8325;8698;8699;8700;8701;11077;11078;11079;11080;14135;14136;14137;14138;14139;16344;16345;16346;16347;16348;16349;16350;16351;16415;18721;20977;20978;20979;20980;20981;20982;20983;20984;20985;20986;25071;25072;25073;26951;26952;26953;26954;26955;26956;26957;26958;28725;28726;28727;29584;29585;29586;29933;29934;29935;…	1404;3488;4816;6091;7146;8322;8324;8325;8700;8701;11080;14136;16344;16415;18721;20985;25073;26953;26958;28726;29586;29934;29941;31843;32265;32717;32747;33464;35882;36224;37398;37584;38907;39207;39976;40620;40621;45047;47209;49432;50781;52987;53559;54715		788;789;790;791;792;793;794		1;124;230;642;798;814;818	Q8N1F7;H3BVG0;Q8N1F7-2;H3BM93;H3BRI8;H3BV11;H3BNN5;H3BP95;H3BPA9;H3BVE2;H3BMX0;H3BRD9;H3BV15;H3BNG7	Q8N1F7;H3BVG0;Q8N1F7-2
sp|P61313|RL15_HUMAN 60S ribosomal protein L15 OS=Homo sapiens OX=9606 GN=RPL15 PE=1 SV=2;tr|A0A2R8YEM3|A0A2R8YEM3_HUMAN Ribosomal protein L15 (Fragment) OS=Homo sapiens OX=9606 GN=RPL15 PE=1 SV=1;tr|E7EQV9|E7EQV9_HUMAN Ribosomal protein L15 (Fragment) OS=	60S ribosomal protein L15;Ribosomal protein L15	RPL15	3.97925	3.97925	1.96762	38.7	45.1	319240000	5034900000	29022000	457720000	1050900000	4110300000	13	43	8	12	12	12	7	11	7	11	7	11	45.1	45.1	45.1	24.146	204	204;169;174;175;133;138;145;44	58.842				1523	867;3859;4637;4648;11379;11564;11958;12767;13808;16535;16536;17647	True;True;True;True;True;True;True;True;True;True;True;True	898;4026;4835;4847;12000;12192;12607;13460;14565;17415;17416;18568	2583;2584;2585;11558;11559;11560;11561;11562;11563;11564;11565;13905;13906;13907;13908;13909;13910;13911;13912;13947;35127;35128;35698;35699;35700;36937;36938;36939;36940;39384;39385;39386;39387;39388;39389;39390;39391;39392;42684;42685;42686;42687;42688;42689;51628;51629;51630;51631;55039;55040	2813;2814;2815;12335;12336;12337;12338;12339;12340;12341;12342;12343;12344;12345;14847;14848;14849;14850;14851;14852;14853;14854;14894;37835;37836;38441;38442;38443;39789;39790;39791;39792;39793;39794;42361;42362;42363;42364;42365;42366;42367;42368;42369;45869;45870;45871;45872;45873;45874;55554;55555;55556;55557;59180;59181;59182	2813;12345;14854;14894;37836;38443;39791;42369;45872;55556;55557;59180					P61313;A0A2R8YEM3;E7EQV9;E7ENU7;E7EX53;A0A2R8Y738;P61313-2;E7ERA2	P61313;A0A2R8YEM3;E7EQV9;E7ENU7;E7EX53;A0A2R8Y738;P61313-2
sp|P30533|AMRP_HUMAN Alpha-2-macroglobulin receptor-associated protein OS=Homo sapiens OX=9606 GN=LRPAP1 PE=1 SV=1;tr|A0A3B3IRQ7|A0A3B3IRQ7_HUMAN Alpha-2-macroglobulin receptor-associated protein OS=Homo sapiens OX=9606 GN=LRPAP1 PE=1 SV=1	Alpha-2-macroglobulin receptor-associated protein	LRPAP1	-0.371532	-0.371558	-0.677308	47.1	41.5	5455900000	4217200000	272800000	210860000	6494000000	4060900000	48	83	3	26	26	26	19	20	19	20	19	20	47.6	47.6	47.6	41.465	357	357;279;105	276.67				1347	3071;3430;4334;5759;6748;6749;7357;7498;7853;8024;8721;8722;9262;10262;11229;12082;12469;12470;12471;12571;12905;13542;15049;15481;16223;16886	True;True;True;True;True;True;True;True;True;True;True;True;True;True;True;True;True;True;True;True;True;True;True;True;True;True	3199;3581;4519;6000;7027;7028;7673;7823;8188;8367;9104;9105;9667;10722;11841;12734;13147;13148;13149;13254;13607;14286;15859;16317;17094;17781	9151;9152;9153;9154;9155;9156;9157;9158;9159;9160;9161;10322;10323;10324;13002;13003;13004;13005;13006;13007;13008;13009;13010;13011;13012;13013;17377;17378;17379;20456;20457;20458;20459;20460;20461;20462;20463;22363;22364;22806;22807;22808;24017;24018;24019;24020;24021;24022;24023;24024;24521;24522;24523;24524;24525;24526;24527;26594;26595;26596;26597;26598;26599;26600;26601;26602;28253;28254;28…	9775;9776;9777;9778;9779;9780;9781;9782;9783;9784;9785;9786;11012;11013;11014;13863;13864;13865;13866;13867;13868;13869;13870;13871;13872;13873;13874;18573;18574;18575;22004;22005;22006;22007;22008;22009;22010;22011;24027;24028;24510;24511;24512;25946;25947;25948;25949;25950;25951;25952;25953;26474;26475;26476;26477;26478;26479;26480;28687;28688;28689;28690;28691;28692;28693;28694;28695;30433;304…	9783;11013;13872;18575;22004;22006;24027;24510;25953;26475;28688;28695;30435;33605;37344;40192;41412;41415;41419;41725;42874;45018;50359;51963;54563;56727					P30533;A0A3B3IRQ7;D6REW6	P30533;A0A3B3IRQ7
sp|P55060|XPO2_HUMAN Exportin-2 OS=Homo sapiens OX=9606 GN=CSE1L PE=1 SV=3;sp|P55060-4|XPO2_HUMAN Isoform 4 of Exportin-2 OS=Homo sapiens OX=9606 GN=CSE1L;sp|P55060-3|XPO2_HUMAN Isoform 3 of Exportin-2 OS=Homo sapiens OX=9606 GN=CSE1L	Exportin-2	CSE1L	1.09553	1.09554	0.326583	28.3	26.7	2302200000	4919600000	44273000	94608000	3211700000	4027600000	42	83	4	29	29	29	21	24	21	24	21	24	33.6	33.6	33.6	110.42	971	971;915;945;195	323.31				1483	45;46;1188;2157;2158;2911;3851;4088;5422;5695;5725;6245;6321;7244;7723;9035;9068;10273;10322;11398;11974;12174;12550;12990;12991;15105;15106;16342;16748	True;True;True;True;True;True;True;True;True;True;True;True;True;True;True;True;True;True;True;True;True;True;True;True;True;True;True;True;True	47;48;1240;2240;2241;3027;3028;4018;4263;5644;5930;5963;6504;6582;7551;8054;9423;9457;10743;10744;10803;10804;12019;12623;12830;13231;13693;13694;15918;15919;17219;17637	132;133;134;135;136;137;138;139;140;141;3534;3535;3536;3537;3538;3539;3540;3541;3542;6345;6346;6347;6348;6349;6350;6351;6352;6353;8521;8522;8523;8524;8525;8526;8527;8528;8529;8530;8531;8532;8533;8534;8535;8536;11539;12284;12285;12286;12287;12288;12289;16327;16328;16329;16330;17169;17170;17171;17172;17287;17288;17289;18798;18799;19030;19031;19032;22034;23591;23592;27534;27535;27536;27650;27651;276…	135;136;137;138;139;140;141;142;143;144;3810;3811;3812;3813;3814;3815;3816;3817;3818;6761;6762;6763;6764;6765;6766;6767;6768;6769;9113;9114;9115;9116;9117;9118;9119;9120;9121;9122;9123;9124;9125;9126;9127;9128;9129;9130;9131;12316;13100;13101;13102;13103;13104;13105;17461;17462;17463;17464;17465;17466;18362;18363;18364;18365;18482;18483;18484;20081;20082;20322;20323;20324;20325;20326;20327;23684;…	137;144;3815;6762;6768;9119;12316;13100;17465;18362;18484;20082;20323;23684;25498;29688;29813;33760;33912;37889;39826;40431;41680;43148;43150;50567;50571;54955;56246		568;569;570;571;572		1;817;820;920;946	P55060;P55060-4;P55060-3;P55060-2	P55060;P55060-4;P55060-3
sp|Q01082|SPTB2_HUMAN Spectrin beta chain, non-erythrocytic 1 OS=Homo sapiens OX=9606 GN=SPTBN1 PE=1 SV=2;tr|A0A087WUZ3|A0A087WUZ3_HUMAN Spectrin beta chain OS=Homo sapiens OX=9606 GN=SPTBN1 PE=1 SV=1;sp|Q01082-3|SPTB2_HUMAN Isoform 2 of Spectrin beta chai	Spectrin beta chain, non-erythrocytic 1	SPTBN1	2.39648	2.39646	1.85064	15.3	44.3	778570000	4099300000	5482900	28868000	1043700000	3764200000	50	205	10	87	87	83	26	82	26	82	25	78	46.9	46.9	45.3	274.61	2364	2364;2366;2155;2168;690;2106;2137;934;2365;2390	323.31				1582	438;833;1113;1363;1887;1995;2148;2273;2348;2495;2603;2689;2872;2946;2960;3086;3098;3292;3381;3489;3540;3548;3634;3744;3894;4189;5234;5749;5798;5806;5823;5975;6576;6945;7080;7081;7351;7410;7518;7624;7627;7628;7850;8160;8598;8835;8903;9126;9308;9365;9373;9609;9610;9788;9862;9893;9987;9988;9994;10040;10060;10385;10518;10776;11457;11752;11785;11850;12207;12253;12310;13381;13905;14063;14570;14587;1507…	True;True;True;True;True;True;True;True;True;True;True;True;True;True;True;True;True;True;True;True;True;True;True;True;True;True;True;True;True;True;True;True;True;True;True;True;True;True;True;True;True;True;True;True;True;True;True;True;True;True;True;True;True;True;True;True;True;True;True;True;True;True;True;True;True;True;True;True;True;True;True;True;True;True;True;True;True;True;True;True…	461;862;863;1150;1421;1963;2075;2231;2361;2442;2596;2708;2798;2986;3066;3082;3215;3227;3435;3529;3643;3695;3703;3793;3907;4061;4366;5450;5988;6040;6048;6067;6223;6846;7230;7367;7368;7667;7729;7845;7953;7956;7957;8185;8512;8971;9220;9291;9518;9716;9778;9786;10028;10029;10210;10288;10319;10415;10416;10423;10469;10490;10880;11047;11362;12082;12391;12425;12492;12864;12915;12979;14119;14675;14842;1536…	1342;1343;1344;2420;2421;3282;3283;3284;3285;3286;3287;3288;3289;4021;4022;4023;4024;4025;4026;5562;5563;5564;5565;5566;5567;5568;5569;5871;5872;5873;6328;6329;6655;6656;6657;6658;6659;6900;6901;7330;7658;7659;7660;7661;7662;7893;8385;8386;8671;8729;8730;8731;9194;9195;9228;9229;9866;10145;10146;10147;10516;10643;10644;10656;10657;10658;10920;10921;11208;11209;11210;11211;11693;11694;12592;12593;…	1422;1423;1424;2532;2533;3542;3543;3544;3545;3546;3547;3548;3549;4331;4332;4333;4334;4335;4336;5947;5948;5949;5950;5951;5952;5953;5954;5955;6266;6267;6268;6744;6745;7074;7075;7076;7077;7078;7334;7335;7798;8166;8167;8168;8169;8170;8411;8967;8968;9271;9331;9332;9333;9819;9820;9854;9855;10534;10829;10830;10831;11253;11384;11385;11397;11398;11399;11668;11669;11963;11964;11965;11966;12480;12481;13425;…	1422;2533;3549;4336;5953;6267;6744;7076;7335;7798;8170;8411;8968;9271;9332;9819;9855;10534;10831;11253;11385;11398;11669;11966;12481;13425;16849;18531;18751;18773;18826;19254;21216;22605;23020;23021;24017;24209;24571;25136;25146;25147;25937;26858;28315;29080;29288;30016;30602;30867;30907;31627;31630;32195;32424;32520;32763;32765;32783;32907;32963;34202;34723;35742;38123;39154;39226;39408;40539;40…		607		1630	Q01082;A0A087WUZ3;Q01082-3;Q01082-2;F8W6C1;P11277-3;P11277;A4QPE4;O15020-2;O15020	Q01082;A0A087WUZ3;Q01082-3;Q01082-2
sp|Q15428|SF3A2_HUMAN Splicing factor 3A subunit 2 OS=Homo sapiens OX=9606 GN=SF3A2 PE=1 SV=2	Splicing factor 3A subunit 2	SF3A2	-1.22286	-1.22285	-1.1746	36.4	28.7	8805100000	3772400000	628940000	269460000	8410500000	3725900000	72	69	2	19	19	19	18	13	18	13	18	13	36.4	36.4	36.4	49.255	464	464;135	319.69				1752	2401;2674;2675;2676;2938;4198;4494;5819;6060;9571;10191;10263;11883;12054;12332;14879;14880;17361;17362	True;True;True;True;True;True;True;True;True;True;True;True;True;True;True;True;True;True;True	2497;2783;2784;2785;3058;4376;4377;4684;6062;6063;6312;9989;9990;10632;10633;10723;10724;12526;12703;12704;13001;13002;13003;15688;15689;18272;18273;18274;18275	7075;7076;7860;7861;7862;7863;7864;7865;8632;8633;8634;8635;8636;12616;12617;12618;12619;12620;12621;12622;12623;12624;13422;13423;13424;17612;17613;17614;17615;17616;17617;18300;29201;29202;29203;29204;29205;29206;29207;29208;29209;29210;29211;29212;29213;29214;29215;30964;30965;30966;30967;30968;30969;30970;30971;30972;30973;30974;30975;30976;30977;30978;30979;30980;30981;30982;30983;31219;3122…	7532;7533;8378;8379;8380;8381;8382;8383;9232;9233;9234;9235;9236;13449;13450;13451;13452;13453;13454;13455;13456;13457;14310;14311;14312;18813;18814;18815;18816;18817;18818;19539;31476;31477;31478;31479;31480;31481;31482;31483;31484;31485;31486;31487;31488;31489;31490;33343;33344;33345;33346;33347;33348;33349;33350;33351;33352;33353;33354;33355;33356;33357;33358;33359;33360;33361;33362;33606;3360…	7532;8380;8381;8382;9233;13453;14310;18815;19539;31489;33345;33616;39515;40091;40946;49780;49782;58321;58329		706;707;708;709;710;711;712		1;47;127;146;152;171;214	Q15428;K7EMT0	Q15428
sp|Q13263|TIF1B_HUMAN Transcription intermediary factor 1-beta OS=Homo sapiens OX=9606 GN=TRIM28 PE=1 SV=5;sp|Q13263-2|TIF1B_HUMAN Isoform 2 of Transcription intermediary factor 1-beta OS=Homo sapiens OX=9606 GN=TRIM28	Transcription intermediary factor 1-beta	TRIM28	6.73871	6.73868	5.62006	11.3	36.3	37450000	3999500000	1170300	124980000	73419000	3610900000	4	99	5	27	27	27	3	27	3	27	3	27	36.3	36.3	36.3	88.549	835	835;753;460;178;162	323.31				1659	150;303;2099;3767;3768;4284;4312;7014;7015;7496;7500;8036;8666;8809;9693;9760;10139;10418;11943;11944;13349;14132;16110;16632;16633;16903;16961	True;True;True;True;True;True;True;True;True;True;True;True;True;True;True;True;True;True;True;True;True;True;True;True;True;True;True	154;320;2182;3931;3932;4468;4496;7299;7300;7301;7821;7825;8379;9045;9194;10112;10182;10571;10572;10573;10918;10919;12590;12591;12592;14084;14085;14913;16979;17512;17513;17800;17858	433;434;435;436;437;438;439;977;6180;6181;6182;11307;11308;11309;11310;11311;11312;12868;12869;12932;12933;12934;21228;21229;21230;21231;21232;21233;21234;21235;21236;22801;22802;22811;22812;24574;24575;24576;26412;26413;26414;26890;26891;29571;29572;29573;29788;29789;29790;30788;30789;30790;30791;30792;30793;30794;31829;31830;31831;31832;36894;36895;36896;36897;36898;36899;36900;36901;41282;4128…	449;450;451;452;453;454;455;1055;6589;6590;6591;12075;12076;12077;12078;12079;12080;13726;13727;13793;13794;13795;22805;22806;22807;22808;22809;22810;22811;22812;22813;24505;24506;24515;24516;26528;26529;26530;26531;28498;28499;28500;29012;29013;31877;31878;31879;31880;31881;31882;32124;32125;32126;33154;33155;33156;33157;33158;33159;33160;34300;34301;34302;34303;39739;39740;39741;39742;39743;397…	452;1055;6589;12077;12078;13726;13793;22805;22813;24506;24516;26530;28498;29012;31880;32125;33155;34301;39739;39745;44375;47015;54248;55844;55850;56770;56949		650;651;652;653;654;655		297;303;378;423;443;482	Q13263;Q13263-2;M0R0K9;M0R3C0;M0R2I3	Q13263;Q13263-2
sp|Q6P2Q9|PRP8_HUMAN Pre-mRNA-processing-splicing factor 8 OS=Homo sapiens OX=9606 GN=PRPF8 PE=1 SV=2	Pre-mRNA-processing-splicing factor 8	PRPF8	3.57946	3.57943	3.19575	9.9	36.2	317550000	3796100000	2500400	29890000	393470000	3605200000	22	167	4	74	74	74	15	71	15	71	15	71	37.1	37.1	37.1	273.6	2335	2335;1012;250;116	323.31				1891	192;193;304;692;803;914;1060;1186;1197;1312;1422;1653;2019;2020;2064;2084;2085;2184;2185;2457;2769;3122;3260;3371;3503;3902;4233;4351;5510;5617;6007;6359;6607;6944;7332;8285;8946;9266;9804;9805;9830;10013;10087;10785;11230;11367;11989;12304;12349;12389;12532;12732;12733;13398;13401;13792;14561;14655;14670;14695;15306;15307;15536;15671;16723;16791;17146;17185;17263;17302;17492;17648;17749;18025	True;True;True;True;True;True;True;True;True;True;True;True;True;True;True;True;True;True;True;True;True;True;True;True;True;True;True;True;True;True;True;True;True;True;True;True;True;True;True;True;True;True;True;True;True;True;True;True;True;True;True;True;True;True;True;True;True;True;True;True;True;True;True;True;True;True;True;True;True;True;True;True;True;True	198;199;321;719;831;947;1097;1237;1250;1370;1482;1719;2099;2100;2146;2166;2167;2268;2269;2556;2878;3251;3252;3394;3519;3657;4069;4414;4537;5734;5848;6256;6621;6879;7229;7643;8638;9334;9671;10227;10228;10254;10442;10517;11372;11842;11988;12638;12973;13023;13063;13213;13421;13422;14136;14139;14549;15355;15452;15470;15498;16136;16137;16375;16521;17611;17681;18049;18091;18170;18211;18405;18569;18671;…	553;554;555;556;978;979;2025;2026;2027;2028;2322;2323;2719;2720;2721;3137;3138;3529;3560;3561;3562;3563;3883;3884;4198;4199;4200;4883;5951;5952;6093;6148;6149;6150;6151;6417;6418;6419;6420;6421;7236;8101;9304;9305;9306;9307;9308;9309;9720;9721;9722;10124;10125;10126;10544;10545;11709;11710;12704;13068;13069;16555;16556;16557;16902;16903;18148;18149;18150;19162;19948;19949;19950;21023;21024;21025;…	591;592;593;594;1056;1057;2125;2126;2127;2128;2432;2433;2951;2952;2953;3387;3388;3805;3836;3837;3838;3839;4191;4192;4512;4513;4514;5239;6352;6353;6500;6556;6557;6558;6559;6833;6834;6835;6836;6837;7704;8646;9931;9932;9933;9934;9935;9936;9937;10379;10380;10381;10808;10809;10810;11281;11282;12496;12497;13538;13941;13942;17697;17698;17699;18064;18065;19371;19372;19373;20477;21296;21297;21298;22600;22…	593;594;1057;2127;2432;2951;3388;3805;3837;4191;4512;5239;6352;6353;6500;6558;6559;6835;6836;7704;8646;9934;10379;10810;11282;12497;13538;13941;17699;18065;19372;20477;21297;22603;23951;27197;29405;30442;32247;32248;32307;32843;33027;35797;37347;37811;39887;40885;41043;41150;41626;42222;42223;44530;44539;45823;48819;49077;49137;49242;51350;51352;52142;52646;56171;56406;57588;57734;57964;58084;587…	231	749;750	80	1327;1330	Q6P2Q9;I3L0J9;I3L3Z8;I3L1T8	Q6P2Q9
tr|A0A087WUC6|A0A087WUC6_HUMAN Signal peptidase complex subunit 2 OS=Homo sapiens OX=9606 GN=SPCS2 PE=1 SV=1;sp|Q15005|SPCS2_HUMAN Signal peptidase complex subunit 2 OS=Homo sapiens OX=9606 GN=SPCS2 PE=1 SV=3;tr|E9PI68|E9PI68_HUMAN Signal peptidase complex	Signal peptidase complex subunit 2	SPCS2	0.3714	0.37138	-0.55874	45.4	51.5	3759100000	4862800000	313260000	405230000	5266500000	3575400000	36	69	6	19	19	19	12	18	12	18	12	18	52.4	52.4	52.4	25.09	227	227;226;257;157;87;166	323.31				35	23;2325;2326;3789;3849;5976;5977;6005;7220;7221;8483;8484;9781;12577;13396;13496;13497;17681;17961	True;True;True;True;True;True;True;True;True;True;True;True;True;True;True;True;True;True;True	24;2416;2417;2418;2419;3954;4015;4016;6224;6225;6254;7526;7527;7528;8846;8847;10203;13262;14134;14238;14239;18602;18896	59;60;61;6832;6833;6834;6835;6836;6837;6838;6839;6840;6841;6842;6843;6844;6845;6846;6847;11362;11363;11364;11365;11366;11367;11368;11369;11370;11523;11524;11525;11526;11527;11528;11529;11530;11531;11532;11533;11534;11535;18040;18041;18042;18043;18044;18045;18046;18047;18048;18049;18141;18142;18143;18144;21970;21971;21972;21973;21974;21975;21976;21977;21978;21979;21980;21981;21982;21983;21984;2581…	60;61;62;7261;7262;7263;7264;7265;7266;7267;7268;7269;7270;7271;7272;7273;7274;7275;7276;7277;12132;12133;12134;12135;12136;12137;12138;12139;12140;12300;12301;12302;12303;12304;12305;12306;12307;12308;12309;12310;12311;12312;19255;19256;19257;19258;19259;19260;19261;19262;19263;19264;19364;19365;19366;19367;23611;23612;23613;23614;23615;23616;23617;23618;23619;23620;23621;23622;23623;23624;23625…	61;7264;7272;12136;12307;19255;19261;19367;23615;23617;27887;27891;32183;41748;44522;44892;44894;59290;60135		14;15		152;206	A0A087WUC6;Q15005;E9PI68;E9PL01;E9PRB9;H0YE04	A0A087WUC6;Q15005;E9PI68;E9PL01;E9PRB9
sp|Q9P2R6|RERE_HUMAN Arginine-glutamic acid dipeptide repeats protein OS=Homo sapiens OX=9606 GN=RERE PE=1 SV=2;tr|H7BYW9|H7BYW9_HUMAN Arginine-glutamic acid dipeptide repeats protein OS=Homo sapiens OX=9606 GN=RERE PE=1 SV=1;tr|B1AKN3|B1AKN3_HUMAN Arginin	Arginine-glutamic acid dipeptide repeats protein	RERE	-0.209885	-0.209878	-0.438089	22.8	19.3	4335500000	3748500000	72258000	62475000	4702000000	3470600000	90	97	7	27	27	26	25	22	25	22	24	22	22.9	22.9	22.9	172.42	1566	1566;584;1298;1012;91;213;89	250.21				2502	1398;1399;1911;2031;2221;3110;3168;3234;5787;5827;7799;7922;9276;10166;10439;11006;11007;11455;12356;12549;14408;14668;15217;15219;15972;15973;17557	True;True;True;True;True;True;True;True;True;True;True;True;True;True;True;True;True;True;True;True;True;True;True;True;True;True;True	1457;1458;1989;2111;2305;2306;3239;3299;3366;6029;6071;8134;8258;8259;9683;10603;10604;10946;10947;11605;11606;11607;11608;11609;12080;13030;13230;15199;15467;15468;16037;16039;16834;16835;18473;18474	4141;4142;4143;4144;4145;4146;5634;5635;5636;5637;5638;5639;5640;5641;5982;5983;6516;6517;6518;6519;6520;6521;6522;6523;6524;6525;6526;9254;9255;9256;9257;9258;9259;9260;9261;9262;9263;9264;9441;9442;9443;9630;9631;9632;9633;9634;9635;17513;17514;17515;17516;17517;17518;17519;17520;17630;17631;17632;17633;23860;24216;24217;24218;24219;28296;28297;28298;30865;30866;30867;30868;30869;30870;30871;30…	4455;4456;4457;4458;4459;4460;6021;6022;6023;6024;6025;6026;6027;6028;6383;6384;6932;6933;6934;6935;6936;6937;6938;6939;6940;6941;6942;9880;9881;9882;9883;9884;9885;9886;9887;9888;9889;9890;10070;10071;10072;10278;10279;10280;10281;10282;10283;18713;18714;18715;18716;18717;18718;18719;18720;18831;18832;18833;18834;18835;18836;25784;26159;26160;26161;26162;30476;30477;30478;33234;33235;33236;33237…	4458;4459;6028;6383;6939;9889;10072;10278;18720;18831;25784;26159;30477;33244;34404;36559;36563;38114;41066;41679;47967;49133;51007;51024;53820;53825;58911		915;916;917;918;919;920;921;922;923		555;1152;1276;1289;1323;1406;1511;1532;1543	Q9P2R6;H7BYW9;B1AKN3;Q9P2R6-2;H0Y975;A0A075B770;K7EIE3	Q9P2R6;H7BYW9;B1AKN3
sp|P35613-2|BASI_HUMAN Isoform 2 of Basigin OS=Homo sapiens OX=9606 GN=BSG;sp|P35613|BASI_HUMAN Basigin OS=Homo sapiens OX=9606 GN=BSG PE=1 SV=2;tr|A0A087X2B5|A0A087X2B5_HUMAN Basigin (Fragment) OS=Homo sapiens OX=9606 GN=BSG PE=1 SV=1;tr|A0A087WUV8|A0A087	Basigin	BSG	0.598381	0.598397	0.152132	21.6	32	2482800000	3759000000	190980000	289150000	3032100000	3369300000	19	26	10	7	7	7	5	7	5	7	5	7	32	32	32	29.221	269	269;385;221;189;176;205;160;84;132;52	79.155				1367	3891;4915;5379;12678;13179;13206;17318	True;True;True;True;True;True;True	4058;5119;5599;13365;13899;13900;13928;18227	11682;11683;11684;11685;11686;11687;14765;14766;14767;14768;14769;14770;14771;14772;16203;16204;16205;39106;39107;39108;40744;40745;40746;40747;40748;40749;40750;40751;40752;40753;40754;40755;40756;40757;40849;40850;40851;40852;40853;40854;54054;54055;54056;54057;54058	12469;12470;12471;12472;12473;12474;15779;15780;15781;15782;15783;15784;15785;15786;17330;17331;17332;42074;42075;42076;43801;43802;43803;43804;43805;43806;43807;43808;43809;43810;43811;43812;43813;43814;43912;43913;43914;43915;43916;43917;58154;58155;58156;58157;58158	12473;15783;17332;42075;43814;43915;58154		504		176	P35613-2;P35613;A0A087X2B5;A0A087WUV8;P35613-3;P35613-4;I3L192;R4GMX5;A0A2R8YDZ0;R4GN83	P35613-2;P35613;A0A087X2B5;A0A087WUV8;P35613-3;P35613-4;I3L192
			-4.34319	-4.3432	-3.87759	52.8	38.7	41625000000	2050800000	4625100000	227870000	48887000000	3326000000	82	24	1	14	14	14	14	6	14	6	14	6	52.8	52.8	52.8	22.975	199	199	323.31			+	472	2742;2856;3320;3888;3889;5724;5795;5804;8525;12792;12793;16741;17678;17712	True;True;True;True;True;True;True;True;True;True;True;True;True;True	2851;2969;2970;3464;4055;4056;5962;6037;6046;8892;8893;8894;13486;13487;17630;18599;18633	8041;8327;8328;8329;8330;8331;8332;8333;8334;8335;8336;8337;8338;8339;8340;8341;9947;9948;11665;11666;11667;11668;11669;11670;11671;11672;11673;11674;11675;11676;11677;11678;11679;11680;17279;17280;17281;17282;17283;17284;17285;17286;17533;17534;17535;17536;17537;17564;17565;17566;17567;17568;17569;17570;25980;25981;25982;25983;25984;25985;25986;25987;25988;25989;25990;25991;25992;25993;25994;259…	8574;8878;8879;8880;8881;8882;8883;8884;8885;8886;8887;8888;8889;8890;8891;8892;8893;8894;8895;8896;8897;10618;10619;12449;12450;12451;12452;12453;12454;12455;12456;12457;12458;12459;12460;12461;12462;12463;12464;12465;12466;12467;18474;18475;18476;18477;18478;18479;18480;18481;18733;18734;18735;18736;18737;18764;18765;18766;18767;18768;18769;18770;18771;28052;28053;28054;28055;28056;28057;28058;…	8574;8879;10618;12460;12466;18476;18735;18769;28056;42453;42461;56231;59278;59372		176;177		123;135	CON__P02662	CON__P02662
sp|O15083|ERC2_HUMAN ERC protein 2 OS=Homo sapiens OX=9606 GN=ERC2 PE=1 SV=3;tr|H7C4G9|H7C4G9_HUMAN ERC protein 2 (Fragment) OS=Homo sapiens OX=9606 GN=ERC2 PE=1 SV=1	ERC protein 2	ERC2	-1.16938	-1.16942	-1.22077	63.8	47.3	6952100000	3091000000	144840000	64396000	7700200000	3303800000	151	119	14	78	78	78	65	49	65	49	65	49	66	66	66	110.56	957	957;528;976;1086;1120;948;992;1088;1116;344;344;720;285;285	323.31				988	91;724;1088;1089;1180;1910;2154;2215;2276;2277;2430;2431;2739;2756;2908;2909;3074;3384;3424;4566;4567;6019;6074;6075;7371;7372;7421;7639;7724;7728;7970;7971;7972;8113;8114;8115;8116;8463;8869;8881;10132;10567;10693;10842;10843;11072;11834;11835;11960;12078;12155;12156;12190;12560;12683;12847;13674;13682;13809;13810;14038;14058;14815;14816;15009;15010;15055;15056;15073;15117;15223;15409;15872;1638…	True;True;True;True;True;True;True;True;True;True;True;True;True;True;True;True;True;True;True;True;True;True;True;True;True;True;True;True;True;True;True;True;True;True;True;True;True;True;True;True;True;True;True;True;True;True;True;True;True;True;True;True;True;True;True;True;True;True;True;True;True;True;True;True;True;True;True;True;True;True;True;True;True;True;True;True;True;True	93;751;1125;1126;1231;1988;2237;2299;2364;2365;2526;2527;2528;2848;2865;3024;3025;3202;3532;3575;4758;4759;6269;6326;6327;7687;7688;7740;7969;8055;8059;8311;8312;8313;8463;8464;8465;8466;8824;9255;9268;10564;11104;11105;11258;11435;11436;11674;11675;12476;12477;12609;12730;12810;12811;12846;13242;13243;13370;13371;13544;13545;14421;14429;14566;14567;14814;14835;15622;15623;15819;15820;15865;15866…	250;251;252;253;254;2115;2116;2117;3216;3217;3218;3219;3220;3221;3222;3510;3511;3512;3513;5631;5632;5633;6342;6493;6494;6495;6496;6497;6498;6499;6500;6665;6666;6667;6668;6669;6670;6671;7154;7155;7156;7157;7158;7159;8023;8067;8068;8069;8070;8071;8072;8517;8518;8519;9164;10153;10305;10306;10307;10308;10309;10310;13648;13649;13650;13651;13652;13653;13654;13655;13656;13657;18186;18187;18188;18333;183…	257;258;259;260;261;2217;2218;2219;3474;3475;3476;3477;3478;3479;3480;3784;3785;3786;3787;6018;6019;6020;6758;6909;6910;6911;6912;6913;6914;6915;6916;7084;7085;7086;7087;7088;7089;7090;7621;7622;7623;7624;7625;7626;8544;8606;8607;8608;8609;8610;8611;9109;9110;9111;9789;10837;10995;10996;10997;10998;10999;11000;14548;14549;14550;14551;14552;14553;14554;14555;14556;14557;19412;19413;19414;19585;195…	261;2217;3474;3480;3787;6019;6758;6915;7087;7088;7622;7625;8544;8609;9109;9110;9789;10837;11000;14552;14554;19412;19585;19586;24068;24072;24233;25180;25499;25505;26310;26320;26324;26734;26741;26744;26747;27816;29182;29221;33135;34857;35348;35998;36001;36784;39350;39351;39797;40186;40385;40392;40479;41699;42088;42644;45434;45454;45880;45884;46673;46740;49577;49579;50258;50261;50370;50373;50423;506…		318;319;320;321;322;323;324		62;147;287;403;697;793;854	O15083;H7C4G9;X6RM00;G8JLD3;X6RLX0;Q8IUD2-4;Q8IUD2-2;Q8IUD2-3;Q8IUD2;K7EPP6;A0A0U1RQM4;Q8IUD2-5;K7EPD6;A0A0U1RQN0	O15083;H7C4G9
sp|Q9Y6X2|PIAS3_HUMAN E3 SUMO-protein ligase PIAS3 OS=Homo sapiens OX=9606 GN=PIAS3 PE=1 SV=2;tr|E9PHH8|E9PHH8_HUMAN E3 SUMO-protein ligase PIAS3 OS=Homo sapiens OX=9606 GN=PIAS3 PE=1 SV=1	E3 SUMO-protein ligase PIAS3	PIAS3	2.9582	2.95825	1.92279	17.2	29.9	475890000	3698400000	16996000	132090000	861150000	3265100000	16	49	6	13	12	12	9	13	8	12	8	12	29.9	27.9	27.9	68.017	628	628;593;259;89;92;95	145.04				2644	363;3050;3822;5549;7725;9601;9747;11673;12187;12809;13057;16853;16926	True;True;True;True;True;True;True;True;True;True;True;False;True	383;3178;3987;5776;8056;10020;10168;12306;12843;13504;13763;17745;17823	1151;9089;9090;9091;9092;9093;9094;11439;11440;11441;16668;16669;16670;16671;16672;16673;16674;16675;16676;23594;29302;29303;29304;29305;29306;29307;29308;29309;29737;29738;29739;29740;36101;36102;36103;36104;36105;36106;37589;37590;37591;37592;39529;39530;39531;39532;39533;39534;39535;40307;52583;52584;52585;52586;52587;52588;52589;52830;52831;52832;52833;52834	1231;9710;9711;9712;9713;9714;9715;12210;12211;12212;12213;12214;12215;12216;17820;17821;17822;17823;17824;17825;17826;17827;17828;25500;25501;31588;31589;31590;31591;31592;31593;31594;31595;31596;31597;31598;32070;32071;32072;32073;38876;38877;38878;38879;38880;38881;40467;40468;40469;40470;42517;42518;42519;42520;42521;42522;42523;42524;42525;43350;56572;56573;56574;56575;56576;56577;56578;5657…	1231;9715;12216;17824;25501;31595;32071;38879;40470;42524;43350;56576;56838					Q9Y6X2;E9PHH8;E7ESB4;K7EMP6;U3KQV1;K7EQX5	Q9Y6X2;E9PHH8
sp|Q9Y3T9|NOC2L_HUMAN Nucleolar complex protein 2 homolog OS=Homo sapiens OX=9606 GN=NOC2L PE=1 SV=4	Nucleolar complex protein 2 homolog	NOC2L	0.899094	0.89909	0.145761	20.4	23.4	2045800000	3815200000	73066000	136260000	2804900000	3103100000	38	79	1	23	23	23	16	21	16	21	16	21	27.9	27.9	27.9	84.918	749	749	210.27				2610	1106;2371;2444;2589;2764;2990;3393;3394;4980;7587;8101;8102;8254;8687;9682;9841;10504;10687;11526;12236;12459;16865;16866	True;True;True;True;True;True;True;True;True;True;True;True;True;True;True;True;True;True;True;True;True;True;True	1143;2466;2543;2694;2873;3112;3541;3542;5186;7914;7915;8451;8452;8607;9068;10101;10265;11029;11030;11251;11252;12154;12898;13137;17760;17761	3261;6979;6980;6981;6982;6983;7199;7200;7626;8085;8086;8087;8088;8089;8090;8806;8807;8808;8809;10179;10180;10181;10182;10183;10184;10185;10186;10187;14967;23128;23129;23130;23131;23132;23133;23134;23135;24740;24741;24742;24743;24744;24745;24746;24747;24748;24749;25127;25128;25129;25130;25131;25132;25133;26500;26501;26502;26503;26504;26505;26506;29533;29534;29535;29536;29537;29996;29997;29998;2999…	3520;7428;7429;7430;7431;7432;7667;7668;8134;8627;8628;8629;8630;8631;8632;8633;8634;8635;9408;9409;9410;9411;10864;10865;10866;10867;10868;10869;10870;10871;10872;10873;10874;15988;24987;24988;24989;24990;24991;24992;24993;24994;26702;26703;26704;26705;26706;26707;26708;26709;26710;26711;26712;27108;27109;27110;27111;27112;27113;27114;28589;28590;28591;28592;28593;28594;28595;28596;28597;31836;3…	3520;7430;7668;8134;8630;9409;10869;10874;15988;24988;26704;26708;27111;28595;31840;32344;34651;35337;38334;40629;41390;56635;56640		957;958;959		153;234;495	Q9Y3T9	Q9Y3T9
sp|P78527|PRKDC_HUMAN DNA-dependent protein kinase catalytic subunit OS=Homo sapiens OX=9606 GN=PRKDC PE=1 SV=3;sp|P78527-2|PRKDC_HUMAN Isoform 2 of DNA-dependent protein kinase catalytic subunit OS=Homo sapiens OX=9606 GN=PRKDC	DNA-dependent protein kinase catalytic subunit	PRKDC	3.39072	3.39073	2.79128	6.6	21.9	315720000	3311400000	1435100	15052000	439860000	3044900000	31	182	4	86	86	86	20	81	20	81	20	81	23.1	23.1	23.1	469.08	4128	4128;4097;70;90	323.31				1568	111;801;802;1230;1292;1589;1590;1591;1619;2203;2345;2486;2569;2954;3368;3501;4457;4510;4511;4531;4606;4959;5259;5914;6174;6463;6471;6472;6614;7097;7239;7317;7986;8342;8420;8432;8856;9020;9053;9054;9171;9232;9410;9605;9634;9670;10104;10437;10441;10667;10680;10689;10782;10909;11049;11213;11222;11271;11579;11808;11891;11934;12013;12095;12916;13080;13081;13484;13502;13707;13880;14167;14168;14347;1453…	True;True;True;True;True;True;True;True;True;True;True;True;True;True;True;True;True;True;True;True;True;True;True;True;True;True;True;True;True;True;True;True;True;True;True;True;True;True;True;True;True;True;True;True;True;True;True;True;True;True;True;True;True;True;True;True;True;True;True;True;True;True;True;True;True;True;True;True;True;True;True;True;True;True;True;True;True;True;True;True…	113;829;830;1284;1350;1652;1653;1654;1684;2287;2439;2585;2672;3076;3516;3655;4646;4700;4701;4722;4803;5163;5475;6160;6431;6731;6739;6740;6887;7384;7546;7628;8329;8698;8780;8792;9242;9408;9442;9443;9563;9635;9824;10024;10053;10089;10534;10944;10949;11229;11244;11254;11368;11506;11651;11824;11833;11834;11886;12207;12448;12534;12577;12662;12749;13618;13789;13790;14226;14244;14454;14640;14950;14951;1…	302;303;304;2316;2317;2318;2319;2320;2321;3660;3661;3836;3837;4687;4688;4689;4690;4691;4692;4693;4694;4695;4777;6472;6895;6896;7299;7565;8712;8713;8714;10115;10116;10540;10541;10542;13342;13343;13344;13463;13464;13465;13466;13467;13524;13809;13810;13811;14881;14882;15835;15836;15837;15838;15839;15840;17870;18606;18607;19523;19524;19525;19526;19527;19528;19545;19546;19547;19548;19972;19973;21453;2…	313;314;315;2426;2427;2428;2429;2430;2431;3960;3961;4143;4144;5031;5032;5033;5034;5035;5036;5037;5038;5039;5130;6888;7329;7330;7767;8054;9312;9313;9314;10799;10800;11277;11278;11279;14229;14230;14231;14354;14355;14356;14357;14358;14416;14733;14734;14735;15897;15898;16937;16938;16939;16940;16941;16942;19082;19874;19875;20859;20860;20861;20862;20863;20864;20881;20882;20883;20884;21320;21321;23058;2…	315;2427;2429;3961;4143;5033;5034;5039;5130;6888;7330;7767;8054;9312;10799;11278;14230;14354;14355;14416;14735;15898;16941;19082;19874;20863;20881;20882;21321;23059;23676;23912;26392;27457;27708;27731;29146;29649;29759;29764;30174;30359;31003;31615;31697;31810;33065;34390;34409;35267;35308;35341;35754;36233;36726;37297;37321;37483;38483;39281;39529;39670;39969;40238;42911;43440;43441;44864;44906;…		602;603		879;880	P78527;P78527-2;F5GX40;H0YG84	P78527;P78527-2
sp|P17097|ZNF7_HUMAN Zinc finger protein 7 OS=Homo sapiens OX=9606 GN=ZNF7 PE=1 SV=1;sp|P17097-2|ZNF7_HUMAN Isoform 2 of Zinc finger protein 7 OS=Homo sapiens OX=9606 GN=ZNF7;tr|F5H290|F5H290_HUMAN Zinc finger protein 7 OS=Homo sapiens OX=9606 GN=ZNF7 PE=1	Zinc finger protein 7	ZNF7	7.05052	7.05053	5.23767	5.2	14.9	27609000	3659900000	890600	118060000	80653000	3043100000	3	12	10	8	8	8	3	7	3	7	3	7	16.8	16.8	16.8	77.886	686	686;697;590;134;159;241;148;86;146;156	24.169				1266	553;563;565;3599;4808;6233;8175;14274	True;True;True;True;True;True;True;True	578;588;590;3757;5009;6492;8527;15061	1657;1658;1659;1660;1680;1681;1687;1688;10813;10814;14419;18763;24917;24918;44227	1742;1743;1744;1745;1766;1767;1773;1774;11559;11560;15399;20042;26886;26887;47500	1745;1767;1774;11560;15399;20042;26886;47500					P17097;P17097-2;F5H290;E9PM16;E9PIH3;E9PPK0;P17097-3;E9PQI2;E9PJZ3;E9PJX9	P17097;P17097-2;F5H290
sp|Q92995|UBP13_HUMAN Ubiquitin carboxyl-terminal hydrolase 13 OS=Homo sapiens OX=9606 GN=USP13 PE=1 SV=2;sp|Q92995-2|UBP13_HUMAN Isoform 2 of Ubiquitin carboxyl-terminal hydrolase 13 OS=Homo sapiens OX=9606 GN=USP13	Ubiquitin carboxyl-terminal hydrolase 13	USP13	7.96814	7.9681	#NUM!	3.1	41.4	12623000	3160900000	315580	79022000	0	3029700000	1	76	4	28	26	26	1	28	1	26	1	26	41.4	40.2	40.2	97.326	863	863;798;299;75	275.51				2174	1816;2173;2274;2598;3761;3762;4400;4595;5163;6098;6118;6220;7271;7289;7556;7626;8392;8466;8739;10124;11404;12284;14877;15989;16860;16861;17436;17934	True;True;True;True;True;True;False;True;True;True;True;True;True;False;True;True;True;True;True;True;True;True;True;True;True;True;True;True	1890;2256;2362;2703;3925;3926;4588;4789;5374;6350;6371;6479;7580;7599;7883;7955;8750;8827;9123;10555;12025;12949;15686;16854;17755;17756;18349;18869	5375;5376;6377;6378;6379;6660;6661;7643;7644;7645;11297;11298;11299;11300;11301;13204;13205;13206;13736;13737;15534;15535;15536;18387;18388;18389;18390;18391;18440;18729;18730;18731;22129;22130;22131;22188;22189;22190;22191;23052;23053;23054;23055;23056;23057;23269;23270;23271;23272;23273;25565;25566;25567;25754;25755;25756;25757;26674;26675;26676;26677;30750;30751;30752;30753;35192;37898;37899;3…	5749;5750;6793;6794;6795;7079;7080;8151;8152;8153;12065;12066;12067;12068;12069;14085;14086;14087;14088;14640;14641;16602;16603;16604;16605;19640;19641;19642;19643;19644;19697;20005;20006;20007;20008;23790;23791;23792;23849;23850;23851;23852;24908;24909;24910;24911;24912;24913;25141;25142;25143;25144;25145;27625;27626;27627;27821;27822;27823;27824;28779;28780;28781;28782;33115;33116;33117;33118;3…	5749;6795;7079;8151;12065;12069;14085;14640;16605;19642;19697;20008;23791;23849;24908;25145;27626;27824;28779;33117;37903;40786;49769;53877;56620;56622;58543;60053	259;260		326;328		Q92995;Q92995-2;H7C5J3;H7C502	Q92995;Q92995-2
sp|Q8TDB6|DTX3L_HUMAN E3 ubiquitin-protein ligase DTX3L OS=Homo sapiens OX=9606 GN=DTX3L PE=1 SV=1	E3 ubiquitin-protein ligase DTX3L	DTX3L	7.78894	7.78899	6.74918	6.8	39.2	14306000	3163900000	357640	79098000	28070000	3019600000	2	83	2	29	29	29	3	29	3	29	3	29	39.2	39.2	39.2	83.553	740	740;228	323.31				2106	645;646;2414;3030;3428;3702;3916;3917;4040;4829;5244;5451;6248;6249;6840;6841;7304;7305;7476;8216;8581;8897;12298;12676;13344;13940;14639;14640;16473	True;True;True;True;True;True;True;True;True;True;True;True;True;True;True;True;True;True;True;True;True;True;True;True;True;True;True;True;True	671;672;2510;3153;3579;3862;4086;4087;4088;4214;5031;5460;5674;6507;6508;7123;7124;7615;7616;7798;8569;8954;9284;9285;12964;13363;14079;14710;15434;15435;17351	1902;1903;1904;1905;7112;7113;8961;8962;10318;10319;10320;11084;11762;11763;11764;11765;11766;11767;11768;11769;12128;12129;12130;12131;14477;14478;14479;14480;15778;15779;16410;16411;18804;18805;18806;18807;18808;18809;18810;18811;20723;20724;20725;20726;20727;22224;22225;22226;22227;22228;22229;22230;22723;22724;22725;22726;25038;25039;25040;26181;26182;27134;27135;27136;27137;27138;27139;27140…	1996;1997;1998;1999;2000;7579;7580;9578;9579;11008;11009;11010;11834;12550;12551;12552;12553;12554;12555;12556;12557;12940;12941;12942;12943;15462;15463;15464;15465;16873;16874;16875;17549;17550;20087;20088;20089;20090;20091;20092;20093;20094;22276;22277;22278;22279;22280;23885;23886;23887;23888;23889;23890;23891;24416;24417;24418;24419;27011;27012;27013;27014;27015;27016;28260;28261;29264;29265;…	1998;2000;7580;9578;11009;11834;12551;12556;12942;15463;16874;17550;20090;20093;22276;22278;23885;23886;24416;27014;28261;29269;40852;42070;44351;46368;49024;49029;55334	251;252		401;728		Q8TDB6;Q8TDB6-2	Q8TDB6
sp|O00767|ACOD_HUMAN Acyl-CoA desaturase OS=Homo sapiens OX=9606 GN=SCD PE=1 SV=2	Acyl-CoA desaturase	SCD	1.36382	1.36385	1.18162	19.5	23.1	1219900000	3139600000	93837000	241510000	1323800000	3002800000	19	41	1	12	12	12	6	8	6	8	6	8	30.4	30.4	30.4	41.522	359	359	323.31				965	3037;3038;4329;4330;4736;5442;5443;5444;11686;12605;16569;16570	True;True;True;True;True;True;True;True;True;True;True;True	3160;3161;4514;4515;4937;5664;5665;5666;5667;12319;13290;17449;17450	8979;8980;8981;8982;8983;8984;8985;12992;12993;12994;14211;14212;14213;14214;14215;16381;16382;16383;16384;16385;16386;16387;16388;16389;16390;16391;16392;16393;16394;16395;16396;16397;16398;36144;36145;36146;36147;36148;36149;36150;36151;36152;36153;36154;38880;38881;38882;51719;51720;51721;51722;51723;51724;51725	9596;9597;9598;9599;9600;9601;9602;13853;13854;13855;15181;15182;15183;15184;15185;17520;17521;17522;17523;17524;17525;17526;17527;17528;17529;17530;17531;17532;17533;17534;17535;17536;17537;38921;38922;38923;38924;38925;38926;38927;38928;38929;38930;38931;38932;38933;38934;38935;38936;38937;41832;41833;41834;55659;55660;55661;55662;55663;55664;55665	9597;9601;13853;13854;15182;17521;17532;17537;38925;41833;55663;55664		313		212	O00767	O00767
sp|Q8NAA4-3|A16L2_HUMAN Isoform 3 of Autophagy-related protein 16-2 OS=Homo sapiens OX=9606 GN=ATG16L2;sp|Q8NAA4-2|A16L2_HUMAN Isoform 2 of Autophagy-related protein 16-2 OS=Homo sapiens OX=9606 GN=ATG16L2;sp|Q8NAA4|A16L2_HUMAN Autophagy-related protein 16			#NUM!	#VALUE!	#NUM!	0	0	0	5120300000	NaN	NaN	0	2955600000	0	2	3	1	1	1	0	1	0	1	0	1	0	0	0	31.444	275	275;513;619	1.533		+		2675	12315	TRUE	12984	38000;38001	40902;40903	40902					REV__Q8NAA4-3;REV__Q8NAA4-2;REV__Q8NAA4	REV__Q8NAA4-3;REV__Q8NAA4-2;REV__Q8NAA4
sp|P54259|ATN1_HUMAN Atrophin-1 OS=Homo sapiens OX=9606 GN=ATN1 PE=1 SV=3	Atrophin-1	ATN1	-1.15649	-1.15641	-0.710946	22.8	27.1	4799800000	2153200000	129720000	58196000	4806200000	2936200000	46	71	1	20	19	19	13	18	12	18	12	18	29.8	29.8	29.8	125.41	1190	1190	175.56				1473	2220;2679;5691;7902;7909;8736;10330;11008;12266;13076;13140;13141;14615;14616;14625;15217;15218;15792;17060;17946	True;True;True;True;True;True;True;True;True;True;True;True;True;True;True;False;True;True;True;True	2304;2788;5926;8237;8244;9120;10812;10813;10814;11610;12928;13785;13856;13857;15410;15411;15420;16037;16038;16650;17960;18881	6508;6509;6510;6511;6512;6513;6514;6515;7870;7871;17148;17149;17150;17151;17152;17153;17154;17155;17156;17157;24159;24160;24161;24162;24163;24184;24185;24186;24187;24188;26658;26659;26660;26661;26662;26663;26664;26665;26666;31485;31486;31487;31488;31489;31490;31491;31492;33935;33936;33937;33938;33939;33940;33941;33942;37834;37835;40385;40386;40387;40388;40389;40390;40610;40611;40612;40613;40614;4…	6924;6925;6926;6927;6928;6929;6930;6931;8388;8389;18337;18338;18339;18340;18341;18342;18343;18344;18345;18346;18347;26102;26103;26104;26105;26106;26127;26128;26129;26130;26131;28758;28759;28760;28761;28762;28763;28764;28765;28766;28767;28768;28769;28770;28771;33925;33926;33927;33928;33929;33930;33931;33932;33933;33934;33935;33936;36567;36568;36569;36570;36571;36572;36573;36574;36575;36576;36577;4…	6927;8388;18337;26105;26127;28764;33930;36568;40720;43432;43666;43669;48971;48972;48986;51007;51008;53145;57304;60087		564;565		205;233	P54259	P54259
sp|O43900|PRIC3_HUMAN Prickle planar cell polarity protein 3 OS=Homo sapiens OX=9606 GN=PRICKLE3 PE=1 SV=2;tr|H0Y413|H0Y413_HUMAN Prickle planar cell polarity protein 3 OS=Homo sapiens OX=9606 GN=PRICKLE3 PE=1 SV=2;sp|O43900-2|PRIC3_HUMAN Isoform 2 of Pric	Prickle-like protein 3	PRICKLE3	1.56745	1.56744	0.515507	24.1	22.8	1246100000	3693200000	44504000	131900000	2039600000	2915600000	23	54	6	14	14	14	11	12	11	12	11	12	26.8	26.8	26.8	68.608	615	615;547;534;251;114;98	93.751				1030	1030;2766;4622;5503;5837;6128;8633;11979;12875;14416;14471;15211;16868;16869	True;True;True;True;True;True;True;True;True;True;True;True;True;True	1066;2875;4819;5727;6082;6381;9010;12628;13575;15207;15262;16030;17763;17764	3051;3052;3053;3054;8094;8095;8096;8097;13856;13857;13858;16537;16538;16539;16540;16541;16542;17656;17657;17658;18466;26313;26314;26315;36984;36985;36986;36987;36988;36989;39752;39753;39754;44687;44688;44689;44690;44691;44692;44845;44846;44847;44848;44849;47322;47323;47324;52649;52650;52651;52652;52653;52654;52655;52656;52657;52658;52659;52660;52661;52662;52663;52664;52665	3294;3295;3296;3297;3298;8639;8640;8641;8642;14790;14791;14792;17677;17678;17679;17680;17681;17682;17683;17684;18861;18862;18863;19725;28398;28399;28400;39839;39840;39841;39842;39843;39844;42762;42763;42764;47991;47992;47993;47994;47995;47996;47997;47998;47999;48000;48001;48002;48003;48004;48163;48164;48165;48166;48167;50938;50939;50940;56643;56644;56645;56646;56647;56648;56649;56650;56651;56652;…	3296;8642;14791;17684;18863;19725;28400;39844;42762;47996;48165;50938;56647;56662	119		191		O43900;H0Y413;O43900-2;H7BZP7;A0A0A0MRT7;F5H4N2	O43900;H0Y413;O43900-2
sp|P42167|LAP2B_HUMAN Lamina-associated polypeptide 2, isoforms beta/gamma OS=Homo sapiens OX=9606 GN=TMPO PE=1 SV=2;tr|G5E972|G5E972_HUMAN Lamina-associated polypeptide 2, isoforms beta/gamma OS=Homo sapiens OX=9606 GN=TMPO PE=1 SV=1;sp|P42167-2|LAP2B_HUM	Lamina-associated polypeptide 2, isoforms beta/gamma;Thymopoietin;Thymopentin;Lamina-associated polypeptide 2, isoform alpha;Thymopoietin;Thymopentin	TMPO	-0.188125	-0.188126	-0.486617	54.2	46	3446100000	3024800000	156640000	137490000	4025100000	2872700000	73	76	6	30	30	30	27	21	27	21	27	21	60.6	60.6	60.6	50.67	454	454;414;345;248;694;237	224.81				1389	872;2120;2121;2541;4552;4878;5275;5646;5991;7667;7713;8749;8750;10245;11466;11694;11695;11696;11697;11837;12788;12891;13186;13187;14264;16016;17599;17600;17976;17977	True;True;True;True;True;True;True;True;True;True;True;True;True;True;True;True;True;True;True;True;True;True;True;True;True;True;True;True;True;True	903;2203;2204;2643;4744;5082;5491;5878;6240;7998;8044;9133;9134;10701;12091;12330;12331;12332;12333;12479;13482;13592;13907;13908;15051;16882;18518;18519;18912;18913	2597;6257;6258;6259;6260;6261;7467;7468;7469;7470;7471;13594;13595;13596;13597;13598;13599;13600;13601;14648;14649;14650;14651;14652;15886;15887;16996;16997;16998;16999;17000;17001;17002;17003;17004;17005;17006;17007;18103;18104;18105;23396;23568;23569;23570;23571;23572;23573;26703;26704;26705;26706;26707;26708;26709;26710;26711;26712;26713;26714;26715;31166;31167;31168;35435;35436;35437;35438;35…	2827;6673;6674;6675;6676;6677;7941;7942;7943;7944;7945;14489;14490;14491;14492;14493;14494;14495;14496;15650;15651;15652;15653;15654;15655;15656;16999;17000;18178;18179;18180;18181;18182;18183;18184;18185;18186;18187;18188;18189;18190;19319;19320;19321;19322;19323;25275;25474;25475;25476;25477;25478;25479;28808;28809;28810;28811;28812;28813;28814;28815;28816;28817;28818;28819;28820;33552;33553;33…	2827;6673;6676;7945;14495;15650;16999;18184;19320;25275;25476;28811;28818;33553;38166;38972;38981;38983;38986;39358;42435;42827;43835;43839;47453;53962;59046;59051;60174;60176					P42167;G5E972;P42167-2;P42167-3;P42166;H0YJH7	P42167;G5E972;P42167-2;P42167-3;P42166
sp|Q9NS56|TOPRS_HUMAN E3 ubiquitin-protein ligase Topors OS=Homo sapiens OX=9606 GN=TOPORS PE=1 SV=1;sp|Q9NS56-2|TOPRS_HUMAN Isoform 2 of E3 ubiquitin-protein ligase Topors OS=Homo sapiens OX=9606 GN=TOPORS	E3 ubiquitin-protein ligase Topors	TOPORS	7.11806	7.11805	5.90853	2.8	26.9	22675000	3149900000	472400	65623000	46980000	2822000000	4	95	2	28	28	28	3	28	3	28	3	28	26.9	26.9	26.9	119.2	1045	1045;980	159.54				2428	321;2095;2497;2760;2773;3080;3081;3396;3397;3808;5745;6746;7397;7398;9490;10850;10851;12269;12886;13833;14705;15455;15597;15621;17463;17680;17862;17863	True;True;True;True;True;True;True;True;True;True;True;True;True;True;True;True;True;True;True;True;True;True;True;True;True;True;True;True	338;2178;2598;2869;2882;3208;3209;3210;3545;3546;3973;5984;7025;7714;7715;7716;7717;9907;11444;11445;12931;13587;14593;15508;16290;16443;16469;18376;18601;18795;18796	1014;1015;1016;1017;1018;6173;6174;7332;7333;7334;7335;8079;8107;8108;8109;8110;8111;9176;9177;9178;9179;9180;9181;9182;9183;9184;10193;10194;10195;10196;11412;17330;20452;20453;20454;22490;22491;22492;22493;22494;22495;22496;22497;28968;28969;33428;33429;33430;33431;33432;37840;37841;37842;37843;37844;39794;39795;42804;45766;45767;45768;45769;45770;45771;45772;45773;45774;48176;48177;48178;48179…	1092;1093;1094;1095;1096;6582;6583;7800;7801;7802;7803;7804;7805;7806;8621;8652;8653;8654;8655;8656;9801;9802;9803;9804;9805;9806;9807;9808;9809;10880;10881;10882;10883;12182;18525;22000;22001;22002;24180;24181;24182;24183;24184;24185;24186;24187;31242;31243;36034;36035;36036;36037;36038;40725;40726;40727;40728;40729;42809;42810;45996;49258;49259;49260;49261;49262;49263;49264;49265;49266;51849;51…	1096;6582;7806;8621;8652;9807;9809;10881;10883;12182;18525;22002;24182;24184;31242;36035;36038;40727;42810;45996;49261;51851;52394;52477;58608;59288;59851;59855	275;276	882	73;249	68	Q9NS56;Q9NS56-2	Q9NS56;Q9NS56-2
sp|Q9Y2L9-2|LRCH1_HUMAN Isoform 2 of Leucine-rich repeat and calponin homology domain-containing protein 1 OS=Homo sapiens OX=9606 GN=LRCH1;sp|Q9Y2L9|LRCH1_HUMAN Leucine-rich repeat and calponin homology domain-containing protein 1 OS=Homo sapiens OX=9606	Leucine-rich repeat and calponin homology domain-containing protein 1	LRCH1	4.46094	4.46097	3.25848	9.5	27.7	138950000	3060100000	4342200	95630000	293070000	2804600000	7	51	5	16	16	16	5	16	5	16	5	16	27.7	27.7	27.7	77.224	696	696;728;763;748;765	241.18				2590	241;933;2335;2699;3231;3232;3309;8455;8475;11168;11169;14355;14377;14549;16322;16480	True;True;True;True;True;True;True;True;True;True;True;True;True;True;True;True	253;966;2428;2808;3363;3364;3452;8816;8837;11779;11780;15143;15166;15343;17198;17358	765;766;767;768;2773;2774;2775;2776;2777;2778;6866;6867;6868;6869;7915;7916;7917;7918;7919;7920;7921;9623;9624;9625;9626;9627;9628;9917;9918;25733;25734;25735;25792;34466;34467;34468;34469;34470;34471;34472;34473;44480;44481;44482;44483;44556;45312;45313;45314;45315;45316;45317;45318;51001;51442;51443	823;824;825;826;3006;3007;3008;3009;3010;3011;7296;7297;7298;7299;8433;8434;8435;8436;8437;8438;8439;10271;10272;10273;10274;10275;10276;10585;10586;27799;27800;27801;27802;27859;37136;37137;37138;37139;37140;37141;37142;37143;47771;47772;47773;47774;47775;47855;48784;48785;48786;48787;48788;48789;48790;54907;55360;55361	823;3008;7297;8436;10271;10274;10586;27801;27859;37140;37142;47771;47855;48788;54907;55360					Q9Y2L9-2;Q9Y2L9;Q9Y2L9-3;Q5VUJ6-2;Q5VUJ6	Q9Y2L9-2;Q9Y2L9;Q9Y2L9-3
sp|Q15907|RB11B_HUMAN Ras-related protein Rab-11B OS=Homo sapiens OX=9606 GN=RAB11B PE=1 SV=4;sp|Q15907-2|RB11B_HUMAN Isoform 2 of Ras-related protein Rab-11B OS=Homo sapiens OX=9606 GN=RAB11B;tr|H3BMH2|H3BMH2_HUMAN Ras-related protein Rab-11A (Fragment) O	Ras-related protein Rab-11B;Ras-related protein Rab-11A	RAB11B;RAB11A	1.22256	1.22253	0.75213	56.9	56	1324900000	3091800000	88329000	206120000	1652400000	2783100000	25	33	11	16	16	16	13	12	13	12	13	12	62.4	62.4	62.4	24.488	218	218;179;155;198;155;216;146;60;46;81;213	164.77				1764	813;1318;1701;2024;3211;4418;4643;5501;5502;5777;10900;11055;11347;11348;17093;17094	True;True;True;True;True;True;True;True;True;True;True;True;True;True;True;True	842;1376;1768;2104;3343;4606;4842;5725;5726;6018;11497;11657;11968;11969;17994;17995	2353;2354;2355;2356;3908;3909;3910;3911;5039;5040;5041;5962;5963;5964;5965;5966;5967;5968;9567;9568;13245;13246;13247;13248;13249;13936;13937;13938;13939;16529;16530;16531;16532;16533;16534;16535;16536;17476;17477;33587;33588;33589;33590;33591;34095;34096;34097;35048;35049;53340;53341;53342;53343;53344;53345;53346;53347	2463;2464;2465;2466;4216;4217;4218;4219;4220;5399;5400;5401;6363;6364;6365;6366;6367;6368;6369;10211;10212;14127;14128;14129;14130;14131;14883;14884;14885;14886;17669;17670;17671;17672;17673;17674;17675;17676;18676;18677;36203;36204;36205;36206;36207;36736;36737;36738;37750;37751;57389;57390;57391;57392;57393;57394;57395;57396	2466;4218;5399;6369;10212;14130;14883;17674;17675;18677;36205;36738;37750;37751;57392;57395					Q15907;Q15907-2;H3BMH2;H3BSC1;P62491-2;P62491;B4DQU5;M0R2D0;M0R377;H3BN38;P57735	Q15907;Q15907-2;H3BMH2;H3BSC1;P62491-2;P62491
sp|O14980|XPO1_HUMAN Exportin-1 OS=Homo sapiens OX=9606 GN=XPO1 PE=1 SV=1	Exportin-1	XPO1	2.1912	2.19117	1.47915	14.2	27.3	682000000	3114600000	12868000	58765000	997470000	2780800000	30	97	10	30	30	30	12	28	12	28	12	28	27.5	27.5	27.5	123.38	1071	1071;132;179;94;95;100;82;62;72;59	271.07				982	769;1655;2440;2783;2802;3318;3513;4133;7119;8637;9082;10142;10143;10144;10158;10159;11320;11576;11577;11617;11687;12104;12118;12213;12221;12836;13906;15979;17987;18004	True;True;True;True;True;True;True;True;True;True;True;True;True;True;True;True;True;True;True;True;True;True;True;True;True;True;True;True;True;True	797;1721;2538;2893;2912;3462;3667;4309;7408;9014;9473;10576;10577;10578;10579;10594;10595;11941;12204;12205;12247;12320;12758;12773;12870;12881;13533;14676;16841;16842;18923;18940	2239;2240;2241;2242;4886;4887;4888;4889;4890;4891;7189;7190;7191;8148;8149;8186;8187;8188;8189;9942;10567;10568;10569;10570;10571;10572;10573;10574;10575;10576;12433;12434;21538;21539;21540;21541;21542;26325;26326;26327;27706;27707;27708;27709;27710;27711;27712;27713;27714;27715;30800;30801;30802;30803;30804;30805;30806;30807;30808;30809;30810;30811;30812;30813;30844;30845;30846;30847;30848;30849…	2349;2350;2351;2352;5242;5243;5244;5245;5246;5247;7657;7658;7659;8696;8697;8734;8735;8736;8737;10613;11306;11307;11308;11309;11310;11311;11312;11313;11314;11315;13263;13264;23144;23145;23146;23147;23148;28410;28411;28412;29870;29871;29872;29873;29874;29875;29876;29877;29878;29879;33166;33167;33168;33169;33170;33171;33172;33173;33174;33175;33176;33177;33178;33179;33213;33214;33215;33216;33217;3321…	2351;5245;7657;8697;8736;10613;11315;13264;23144;28412;29874;33170;33172;33179;33215;33220;37651;38469;38475;38627;38938;40254;40289;40555;40585;42601;46244;53839;60195;60264		315;316		73;424	O14980;C9J673;C9JKM9;C9IZS4;C9JQ02;C9JV99;F8WF71;C9IYM2;H7BZC5;C9JF49	O14980
sp|Q15738|NSDHL_HUMAN Sterol-4-alpha-carboxylate 3-dehydrogenase, decarboxylating OS=Homo sapiens OX=9606 GN=NSDHL PE=1 SV=2;tr|C9JDR0|C9JDR0_HUMAN Sterol-4-alpha-carboxylate 3-dehydrogenase, decarboxylating (Fragment) OS=Homo sapiens OX=9606 GN=NSDHL PE=1	Sterol-4-alpha-carboxylate 3-dehydrogenase, decarboxylating	NSDHL	1.09588	1.09593	0.274991	47.5	56.8	1584000000	3385700000	63359000	135430000	2283000000	2762400000	32	73	2	19	19	19	13	17	13	17	13	17	56.8	56.8	56.8	41.9	373	373;254	323.31				1756	468;1160;1674;1675;2323;5595;6585;7185;8606;8607;10276;10941;10984;11275;11824;14906;14907;14908;16675	True;True;True;True;True;True;True;True;True;True;True;True;True;True;True;True;True;True;True	492;1208;1209;1740;1741;2414;5824;6855;7483;7484;8979;8980;10748;10749;11538;11581;11890;12466;15715;15716;15717;17560	1424;1425;1426;3447;3448;3449;3450;3451;3452;3453;3454;4951;4952;4953;4954;4955;4956;4957;4958;4959;4960;4961;4962;4963;4964;4965;4966;4967;4968;4969;6823;6824;6825;6826;6827;6828;6829;6830;16808;16809;16810;16811;16812;16813;16814;16815;16816;16817;19889;19890;19891;21843;21844;21845;21846;26251;26252;26253;26254;31336;31337;31338;31339;31340;33709;33832;33833;33834;33835;33836;33837;34799;34800…	1505;1506;1507;3720;3721;3722;3723;3724;3725;3726;3727;3728;5308;5309;5310;5311;5312;5313;5314;5315;5316;5317;5318;5319;5320;5321;5322;5323;5324;5325;5326;5327;5328;7249;7250;7251;7252;7253;7254;7255;7256;7257;7258;7259;17964;17965;17966;17967;17968;17969;17970;17971;17972;17973;21237;21238;21239;23468;23469;23470;23471;28330;28331;28332;28333;28334;28335;33771;33772;33773;33774;33775;36328;36458…	1506;3728;5317;5327;7255;17968;21238;23470;28330;28335;33771;36328;36461;37502;39329;49866;49867;49869;56019		714;715;716		1;166;347	Q15738;C9JDR0	Q15738;C9JDR0
sp|Q96PZ2|F111A_HUMAN Protein FAM111A OS=Homo sapiens OX=9606 GN=FAM111A PE=1 SV=2	Protein FAM111A	FAM111A	1.735	1.73494	0.896475	44.2	46	940640000	3131200000	31355000	104370000	1376300000	2562000000	39	91	3	29	29	29	20	27	20	27	20	27	49.4	49.4	49.4	70.195	611	611;183;96	323.31				2258	397;2949;3350;3351;3421;3422;4159;4519;5417;6049;7039;7171;7247;7449;7581;8568;8701;8730;8731;9793;9794;10760;10964;12752;13513;15027;16378;17533;17534	True;True;True;True;True;True;True;True;True;True;True;True;True;True;True;True;True;True;True;True;True;True;True;True;True;True;True;True;True	419;3069;3070;3496;3497;3572;3573;4336;4709;5639;6300;7325;7466;7467;7554;7555;7769;7908;8937;9083;9084;9113;9114;9115;10215;10216;10217;11336;11337;11338;11561;13445;14255;15837;17255;18446;18447	1250;1251;8681;8682;8683;8684;8685;8686;8687;8688;8689;10042;10043;10044;10045;10046;10047;10048;10049;10050;10051;10052;10053;10054;10055;10298;10299;10300;10301;10302;10303;12505;12506;12507;12508;13493;13494;13495;13496;13497;16310;16311;16312;16313;16314;16315;18268;18269;18270;18271;21314;21315;21316;21317;21780;21781;21782;21783;21784;21785;21786;21787;21788;22040;22041;22042;22043;22044;22…	1330;1331;9281;9282;9283;9284;9285;9286;9287;9288;9289;10718;10719;10720;10721;10722;10723;10724;10725;10726;10727;10728;10729;10730;10731;10732;10733;10988;10989;10990;10991;10992;10993;13335;13336;13337;13338;14384;14385;14386;14387;14388;17441;17442;17443;17444;17445;17446;19503;19504;19505;19506;22904;22905;22906;22907;22908;22909;22910;23404;23405;23406;23407;23408;23409;23410;23411;23412;23…	1331;9286;10718;10732;10990;10993;13338;14386;17443;19504;22908;23411;23690;24311;24976;28185;28628;28721;28722;32213;32215;35655;36400;42316;44943;50292;55077;58837;58841	265;266;267	837;838;839;840;841	222;227;286	106;126;272;454;514	Q96PZ2;E9PR18;E9PNQ0	Q96PZ2
sp|Q8WVX9|FACR1_HUMAN Fatty acyl-CoA reductase 1 OS=Homo sapiens OX=9606 GN=FAR1 PE=1 SV=1;tr|E9PNW8|E9PNW8_HUMAN Fatty acyl-CoA reductase (Fragment) OS=Homo sapiens OX=9606 GN=FAR1 PE=1 SV=1	Fatty acyl-CoA reductase 1	FAR1	1.87903	1.87908	0.800724	28.3	38.6	846020000	3111900000	29173000	107310000	1467300000	2556000000	20	65	3	21	21	21	11	21	11	21	11	21	38.6	38.6	38.6	59.356	515	515;335;139	219.29				2133	680;889;1893;5717;6288;7492;7808;8558;8583;9288;9528;9529;11387;11614;12110;14769;16711;16892;16893;17969;17970	True;True;True;True;True;True;True;True;True;True;True;True;True;True;True;True;True;True;True;True;True	706;922;1970;5955;6548;7816;7817;8143;8927;8956;9695;9946;9947;12008;12244;12764;15576;17598;17788;17789;17790;18905;18906	1990;1991;1992;1993;2659;2660;2661;2662;2663;5582;5583;5584;17257;17258;17259;17260;18913;18914;18915;18916;18917;22790;22791;22792;22793;22794;22795;23885;23886;23887;23888;23889;26085;26086;26087;26184;26185;26186;26187;26188;26189;26190;26191;26192;28334;28335;28336;28337;28338;29077;29078;29079;29080;29081;29082;29083;29084;29085;35150;35151;35152;35854;35855;35856;35857;35858;37391;37392;459…	2089;2090;2091;2092;2891;2892;2893;2894;2895;5969;5970;5971;18451;18452;18453;18454;20197;20198;20199;20200;20201;24494;24495;24496;24497;24498;24499;25811;25812;25813;25814;25815;28160;28161;28162;28263;28264;28265;28266;28267;28268;28269;28270;28271;30519;30520;30521;30522;30523;31352;31353;31354;31355;31356;31357;31358;31359;31360;37861;37862;37863;38607;38608;38609;38610;38611;40266;40267;494…	2089;2895;5970;18454;20201;24495;25813;28160;28263;30520;31356;31359;37863;38609;40266;49474;56132;56740;56744;60157;60158		815		184	Q8WVX9;E9PNW8;E9PPB8	Q8WVX9;E9PNW8
sp|P17066|HSP76_HUMAN Heat shock 70 kDa protein 6 OS=Homo sapiens OX=9606 GN=HSPA6 PE=1 SV=2	Heat shock 70 kDa protein 6	HSPA6	4.21667	4.21665	#NUM!	12	23.8	140700000	2616000000	3802700	70702000	0	2506100000	3	11	2	14	5	5	7	14	1	5	1	5	23.8	11.2	11.2	71.027	643	643;367	22.237				1265	1172;1525;1852;3831;6341;6342;6971;9042;9043;10428;10750;14304;15583;16018	False;False;True;False;False;True;False;False;False;True;True;False;False;True	1221;1222;1588;1928;3996;6602;6603;7256;9431;9432;10932;11324;15091;16427;16884	3478;3479;3480;3481;3482;3483;4516;4517;4518;4519;4520;4521;4522;5472;11461;11462;11463;11464;11465;11466;11467;19089;19090;19091;19092;19093;19094;19095;19096;19097;19098;19099;21114;21115;21116;27561;27562;27563;27564;27565;27566;27567;27568;27569;27570;31874;33015;33016;44322;44323;48617;48618;48619;48620;48621;48622;48623;48624;48625;50116;50117;50118;50119;50120;50121	3752;3753;3754;3755;3756;3757;4847;4848;4849;4850;4851;4852;4853;5855;12236;12237;12238;12239;12240;12241;12242;12243;12244;20388;20389;20390;20391;20392;20393;20394;20395;20396;20397;20398;20399;20400;22691;22692;22693;29719;29720;29721;29722;29723;29724;29725;29726;29727;29728;34348;35592;35593;47607;47608;52310;52311;52312;52313;52314;52315;52316;52317;52318;52319;52320;52321;53965;53966;53967…	3752;4853;5855;12241;20392;20400;22693;29724;29726;34348;35592;47608;52319;53971		47		451	P17066;P48741	P17066
sp|Q5JTH9-2|RRP12_HUMAN Isoform 2 of RRP12-like protein OS=Homo sapiens OX=9606 GN=RRP12;sp|Q5JTH9-3|RRP12_HUMAN Isoform 3 of RRP12-like protein OS=Homo sapiens OX=9606 GN=RRP12;sp|Q5JTH9|RRP12_HUMAN RRP12-like protein OS=Homo sapiens OX=9606 GN=RRP12 PE=1	RRP12-like protein	RRP12	1.93891	1.93892	0.467016	19.9	25.6	929380000	3563400000	14752000	56562000	1812700000	2505600000	26	85	7	30	30	30	17	27	17	27	17	27	28.7	28.7	28.7	132.71	1197	1197;1236;1297;176;64;106;32	323.31				1831	1143;1762;2599;2698;2746;2848;3881;5357;5360;5383;7337;8373;8410;8509;8595;9025;9520;10108;10939;12541;13073;13074;13118;14465;14466;15144;15164;15757;16409;16424	True;True;True;True;True;True;True;True;True;True;True;True;True;True;True;True;True;True;True;True;True;True;True;True;True;True;True;True;True;True	1182;1183;1830;2704;2807;2855;2959;4048;5577;5580;5603;7650;8731;8769;8770;8875;8968;9413;9938;10538;11536;13222;13782;13783;13834;15256;15257;15961;15982;16614;17286;17302	3354;3355;3356;3357;3358;3359;5196;5197;5198;7646;7647;7914;8049;8302;8303;8304;11643;11644;11645;16139;16140;16141;16142;16143;16144;16145;16146;16150;16214;16215;22300;22301;22302;22303;22304;25507;25508;25509;25623;25624;25625;25626;25627;25927;25928;25929;25930;25931;26221;26222;26223;26224;26225;26226;26227;27508;27509;29059;29060;29061;30709;30710;30711;30712;30713;30714;30715;33700;33701;3…	3616;3617;3618;3619;3620;3621;5564;5565;5566;8154;8155;8432;8583;8850;8851;8852;8853;12426;12427;12428;17264;17265;17266;17267;17268;17269;17270;17271;17275;17341;17342;23961;23962;23963;23964;23965;27563;27564;27565;27684;27685;27686;27687;27688;27999;28000;28001;28002;28003;28300;28301;28302;28303;28304;28305;28306;29659;29660;31334;31335;31336;33074;33075;33076;33077;33078;33079;33080;36319;36…	3616;5565;8155;8432;8583;8852;12427;17265;17275;17342;23964;27563;27686;27999;28304;29659;31335;33076;36320;41655;43423;43425;43595;48150;48152;50760;50815;53049;55160;55219		727;728		79;501	Q5JTH9-2;Q5JTH9-3;Q5JTH9;A0A087X1U8;H7C1M8;A0A087X0G0;A0A087WYW2	Q5JTH9-2;Q5JTH9-3;Q5JTH9
sp|O95202|LETM1_HUMAN Mitochondrial proton/calcium exchanger protein OS=Homo sapiens OX=9606 GN=LETM1 PE=1 SV=1	LETM1 and EF-hand domain-containing protein 1, mitochondrial	LETM1	0.431691	0.43167	-0.213769	43.4	39	2245900000	3029300000	57587000	77673000	2871800000	2476300000	56	90	3	34	34	34	22	28	22	28	22	28	46.3	46.3	46.3	83.353	739	739;254;294	323.31				1107	218;854;986;987;1177;1969;3023;3024;3500;4142;4143;5315;5374;6801;7465;7466;7930;8090;8110;8879;9848;9849;12904;13223;13517;14311;14832;15815;15816;15817;16276;16277;16691;16796	True;True;True;True;True;True;True;True;True;True;True;True;True;True;True;True;True;True;True;True;True;True;True;True;True;True;True;True;True;True;True;True;True;True	225;885;1019;1020;1227;1228;2049;3146;3147;3654;4318;4319;4320;5533;5594;7082;7083;7786;7787;8267;8440;8460;9266;10272;10273;13605;13606;13953;14260;15098;15639;16674;16675;16676;17149;17150;17577;17686;17687	612;613;614;2556;2557;2558;2915;2916;2917;2918;3495;3496;3497;3498;3499;3500;3501;3502;3503;3504;5806;5807;5808;8930;8931;8932;8933;8934;8935;8936;8937;8938;8939;10537;10538;10539;12453;12454;12455;12456;12457;12458;12459;12460;12461;16019;16020;16185;16186;16187;16188;16189;20599;20600;20601;20602;20603;20604;20605;20606;22683;22684;22685;22686;22687;22688;24243;24716;24766;27083;27084;27085;270…	653;654;655;2785;2786;2787;3157;3158;3159;3160;3769;3770;3771;3772;3773;3774;3775;3776;3777;3778;6198;6199;6200;9545;9546;9547;9548;9549;9550;9551;9552;9553;9554;9555;11274;11275;11276;13283;13284;13285;13286;13287;13288;13289;13290;13291;17140;17141;17312;17313;17314;17315;17316;22149;22150;22151;22152;22153;22154;22155;22156;24373;24374;24375;24376;24377;24378;26187;26188;26678;26729;29210;2921…	653;2787;3157;3160;3778;6198;9552;9555;11274;13285;13291;17140;17314;22152;24375;24378;26188;26678;26729;29213;32361;32372;42870;44022;44958;47634;49638;53235;53239;53244;54720;54723;56067;56422		368;369;370;371;372		271;306;421;628;641	O95202;O95202-2;O95202-3	O95202
tr|A0A3B3IS55|A0A3B3IS55_HUMAN Actin-binding LIM protein 1 OS=Homo sapiens OX=9606 GN=ABLIM1 PE=1 SV=1;sp|O14639-2|ABLM1_HUMAN Isoform 2 of Actin-binding LIM protein 1 OS=Homo sapiens OX=9606 GN=ABLIM1;sp|O14639-6|ABLM1_HUMAN Isoform 6 of Actin-binding LIM	Actin-binding LIM protein 1	ABLIM1	-0.749737	-0.749717	-1.07794	42.4	30.9	4391200000	2611500000	78415000	46635000	5179400000	2453500000	87	74	6	32	32	4	28	21	28	21	4	2	43.5	43.5	6.4	94.097	834	834;718;748;778;718;746	220.97				290	827;828;2564;2565;2952;4338;4339;5566;5675;5737;5843;6129;9269;9270;9271;10214;10974;11514;12161;12873;14179;14205;14333;14609;15229;15230;15521;15959;15960;16346;16607;17470	True;True;True;True;True;True;True;True;True;True;True;True;True;True;True;True;True;True;True;True;True;True;True;True;True;True;True;True;True;True;True;True	856;857;2667;2668;3073;3074;4523;4524;5795;5910;5976;6088;6382;6383;6384;9674;9675;9676;9677;9678;10663;11571;12142;12816;12817;13573;14962;14989;15121;15404;16049;16050;16359;16820;16821;17223;17487;18383	2393;2394;2395;2396;2397;2398;2399;2400;2401;2402;7545;7546;7547;7548;7549;7550;7551;7552;7553;7554;7555;7556;8702;8703;8704;8705;13020;13021;13022;13023;13024;13025;13026;13027;16733;17107;17108;17310;17311;17312;17313;17669;18467;18468;18469;18470;18471;18472;18473;18474;18475;18476;18477;18478;18479;28270;28271;28272;28273;28274;28275;28276;28277;28278;28279;28280;28281;28282;28283;28284;28285…	2505;2506;2507;2508;2509;2510;2511;2512;2513;2514;8033;8034;8035;8036;8037;8038;8039;8040;8041;8042;8043;8044;8045;9302;9303;9304;9305;13881;13882;13883;13884;13885;13886;13887;13888;17888;18296;18297;18505;18506;18507;18508;18874;19726;19727;19728;19729;19730;19731;19732;19733;19734;19735;19736;19737;19738;19739;19740;19741;19742;19743;19744;30450;30451;30452;30453;30454;30455;30456;30457;30458;…	2505;2511;8034;8044;9304;13883;13887;17888;18297;18505;18874;19737;30450;30454;30463;33445;36440;38315;40402;42756;47168;47233;47698;48940;51055;51058;52102;53768;53769;54964;55773;58626		97;98;99;100;101		664;679;776;778;811	A0A3B3IS55;O14639-2;O14639-6;O14639;F8W8M4;A0A0A0MRL6	A0A3B3IS55;O14639-2;O14639-6;O14639;F8W8M4;A0A0A0MRL6
sp|P07099|HYEP_HUMAN Epoxide hydrolase 1 OS=Homo sapiens OX=9606 GN=EPHX1 PE=1 SV=1	Epoxide hydrolase 1	EPHX1	2.58257	2.58253	1.78707	29.5	37.4	462800000	2772200000	17800000	106620000	709330000	2448000000	22	74	3	25	25	25	11	24	11	24	11	24	38	38	38	52.948	455	455;136;161	256.34				1178	2499;2500;2720;3301;4095;4096;4097;4165;4166;4375;4520;4521;4845;4846;6349;7283;8644;10899;12432;12433;12933;16133;17215;17694;17695	True;True;True;True;True;True;True;True;True;True;True;True;True;True;True;True;True;True;True;True;True;True;True;True;True	2600;2601;2829;3444;4270;4271;4272;4342;4343;4562;4710;4711;5048;5049;6610;7593;9021;9022;11496;13106;13107;13635;17002;18121;18615;18616	7344;7345;7346;7347;7348;7349;7972;7973;7974;7975;7976;7977;7978;9890;9891;12305;12306;12307;12308;12309;12310;12311;12312;12529;12530;12531;12532;13143;13144;13145;13146;13498;13499;13500;13501;13502;13503;14545;14546;14547;14548;14549;14550;14551;14552;14553;14554;14555;14556;14557;14558;14559;14560;14561;14562;19117;19118;19119;19120;22173;26347;26348;26349;26350;26351;26352;26353;26354;26355;…	7815;7816;7817;7818;7819;7820;8490;8491;8492;8493;8494;8495;8496;10558;10559;13130;13131;13132;13133;13134;13135;13136;13137;13360;13361;13362;13363;14023;14024;14025;14026;14389;14390;14391;14392;14393;14394;14395;15530;15531;15532;15533;15534;15535;15536;15537;15538;15539;15540;15541;15542;15543;15544;15545;15546;15547;20420;20421;20422;20423;23834;28432;28433;28434;28435;28436;28437;28438;2843…	7816;7819;8490;10559;13131;13133;13137;13360;13363;14026;14393;14394;15533;15543;20421;23834;28436;36202;41286;41287;42979;54317;57822;59317;59319		414		426	P07099;B1AQP8;B1AQP9	P07099
sp|P50402|EMD_HUMAN Emerin OS=Homo sapiens OX=9606 GN=EMD PE=1 SV=1;tr|Q5HY57|Q5HY57_HUMAN Emerin OS=Homo sapiens OX=9606 GN=EMD PE=1 SV=1	Emerin	EMD	-1.10532	-1.1053	-1.03929	65.4	49.6	4742700000	2204400000	395220000	183700000	5013300000	2439300000	48	48	3	18	18	18	15	15	15	15	15	15	65.4	65.4	65.4	28.994	254	254;219;21	209.4				1438	1226;2396;4652;5621;6104;6105;7231;7379;9690;9691;9692;10206;10207;12917;14196;15747;17798;17799	True;True;True;True;True;True;True;True;True;True;True;True;True;True;True;True;True;True	1280;2492;4851;5852;6356;6357;7538;7695;10109;10110;10111;10651;10652;10653;10654;13619;14979;14980;16604;18727;18728	3652;3653;7061;7062;7063;7064;7065;7066;7067;7068;7069;7070;13956;13957;13958;13959;13960;13961;13962;16909;16910;16911;16912;16913;16914;18406;18407;18408;18409;18410;18411;18412;18413;18414;18415;22004;22419;22420;22421;22422;22423;22424;22425;22426;22427;29564;29565;29566;29567;29568;29569;29570;31025;31026;31027;31028;31029;31030;31031;31032;31033;31034;31035;31036;31037;31038;31039;31040;310…	3952;3953;7518;7519;7520;7521;7522;7523;7524;7525;7526;7527;14903;14904;14905;14906;14907;14908;14909;18071;18072;18073;18074;18075;18076;18077;19663;19664;19665;19666;19667;19668;19669;19670;19671;19672;23646;24085;24086;24087;24088;24089;24090;24091;24092;24093;31870;31871;31872;31873;31874;31875;31876;33404;33405;33406;33407;33408;33409;33410;33411;33412;33413;33414;33415;33416;33417;33418;334…	3952;7524;14909;18074;19663;19669;23646;24091;31870;31874;31876;33409;33416;42915;47206;53014;59663;59666		554;555		1;191	P50402;Q5HY57;F8WEQ1	P50402;Q5HY57
sp|Q14151|SAFB2_HUMAN Scaffold attachment factor B2 OS=Homo sapiens OX=9606 GN=SAFB2 PE=1 SV=1	Scaffold attachment factor B2	SAFB2	-2.20346	-2.20348	-1.54731	44.5	28.3	6784400000	1473000000	183360000	39810000	7110100000	2432700000	114	57	4	47	47	35	42	24	42	24	33	16	45.2	45.2	33.2	107.47	953	953;115;87;124	271.96				1697	291;292;293;405;1535;1664;1665;1769;1898;1899;2004;2021;2069;2077;2078;2079;2377;2543;2891;2892;3370;3686;3956;4889;4890;5154;5172;5339;5715;7197;7443;7845;9717;9718;10686;11156;11296;11562;12146;12294;12569;12821;13193;13194;13597;15723;17000	True;True;True;True;True;True;True;True;True;True;True;True;True;True;True;True;True;True;True;True;True;True;True;True;True;True;True;True;True;True;True;True;True;True;True;True;True;True;True;True;True;True;True;True;True;True;True	307;308;309;427;1598;1730;1731;1837;1838;1976;1977;2084;2101;2151;2159;2160;2161;2473;2645;3005;3006;3518;3845;4129;5093;5094;5364;5383;5559;5953;7500;7762;8180;10138;10139;11250;11765;11766;11912;12190;12801;12960;13252;13517;13914;13915;14341;16579;17899	920;921;922;923;924;925;926;927;928;929;930;1263;1264;1265;1266;1267;1268;1269;4551;4552;4553;4909;4910;4911;4912;4913;4914;4915;4916;4917;4918;4919;4920;4921;5208;5209;5210;5211;5599;5600;5601;5602;5603;5604;5605;5606;5607;5608;5917;5918;5953;5954;5955;5956;5957;6104;6105;6106;6107;6108;6125;6126;6127;6128;6129;6130;6131;6132;6133;6134;6135;6136;7003;7481;7482;7483;7484;7485;7486;8431;8432;8433;…	989;990;991;992;993;994;995;996;997;998;999;1343;1344;1345;1346;1347;1348;1349;4882;4883;4884;5265;5266;5267;5268;5269;5270;5271;5272;5273;5274;5275;5276;5277;5576;5577;5578;5579;5986;5987;5988;5989;5990;5991;5992;5993;5994;5995;6318;6319;6354;6355;6356;6357;6358;6511;6512;6513;6514;6515;6532;6533;6534;6535;6536;6537;6538;6539;6540;6541;6542;6543;7452;7966;7967;7968;7969;7970;7971;9014;9015;9016;…	989;992;997;1349;4883;5266;5277;5576;5988;5992;6318;6354;6514;6533;6537;6543;7452;7967;9014;9017;10807;11788;12704;15687;15688;16580;16638;17212;18449;23539;24291;25922;31985;31986;35327;37103;37559;38432;40357;40828;41716;42557;43861;43867;45218;52950;57120		674;675		57;866	Q14151;Q14151-2;K7EQU4;K7ERX3	Q14151
tr|H0YNG3|H0YNG3_HUMAN Signal peptidase complex catalytic subunit SEC11 OS=Homo sapiens OX=9606 GN=SEC11A PE=1 SV=1;sp|P67812-4|SC11A_HUMAN Isoform 4 of Signal peptidase complex catalytic subunit SEC11A OS=Homo sapiens OX=9606 GN=SEC11A;sp|P67812|SC11A_HUM	Signal peptidase complex catalytic subunit SEC11;Signal peptidase complex catalytic subunit SEC11A;Signal peptidase I	SEC11A	0.886775	0.886775	0.267446	38.7	34.4	1653400000	3057200000	165340000	305720000	2013500000	2423600000	34	46	9	12	12	12	12	11	12	11	12	11	38.7	38.7	38.7	18.651	163	163;164;179;185;106;153;135;129;166	257.26				784	2983;4171;4172;4666;4667;4668;4671;10513;10514;15997;16150;16151	True;True;True;True;True;True;True;True;True;True;True;True	3105;4348;4349;4865;4866;4867;4870;11039;11040;11041;11042;11043;16862;17019;17020	8796;12538;12539;12540;12541;12542;12543;12544;12545;12546;12547;12548;12549;12550;12551;12552;13989;13990;13991;13992;13993;13994;13995;13996;13997;13998;13999;14004;14005;14006;14007;14008;14009;14010;32172;32173;32174;32175;32176;32177;32178;32179;32180;32181;32182;32183;32184;32185;32186;32187;32188;32189;32190;32191;32192;32193;32194;32195;32196;32197;32198;32199;32200;32201;32202;32203;3220…	9398;13369;13370;13371;13372;13373;13374;13375;13376;13377;13378;13379;13380;13381;13382;13383;14936;14937;14938;14939;14940;14941;14942;14943;14944;14945;14946;14951;14952;14953;14954;14955;14956;14957;34669;34670;34671;34672;34673;34674;34675;34676;34677;34678;34679;34680;34681;34682;34683;34684;34685;34686;34687;34688;34689;34690;34691;34692;34693;34694;34695;34696;34697;34698;34699;34700;3470…	9398;13375;13383;14937;14943;14946;14954;34669;34699;53893;54365;54367		273		1	H0YNG3;P67812-4;P67812;P67812-3;H0YNX5;P67812-2;H0YNA5;H0YKT4;P0C7V7	H0YNG3;P67812-4;P67812;P67812-3;H0YNX5;P67812-2;H0YNA5
sp|Q969G9|NKD1_HUMAN Protein naked cuticle homolog 1 OS=Homo sapiens OX=9606 GN=NKD1 PE=1 SV=1	Protein naked cuticle homolog 1	NKD1	1.36257	1.3626	0.21937	49.6	48.5	1264200000	3250800000	50566000	130030000	2075200000	2416000000	32	71	1	25	25	25	14	22	14	22	14	22	54.9	54.9	54.9	52.284	470	470	323.31				2180	402;403;1242;2729;3183;3233;3449;4950;5159;7320;7617;9866;9867;11013;11118;11119;11873;12573;12760;12851;13450;14406;16374;16375;17011	True;True;True;True;True;True;True;True;True;True;True;True;True;True;True;True;True;True;True;True;True;True;True;True;True	424;425;1296;2838;3314;3365;3601;5154;5370;7631;7946;10292;10293;11615;11724;11725;12516;13256;13453;13549;14190;15197;17251;17252;17910	1257;1258;1259;1260;1261;3698;8001;8002;8003;8004;8005;8006;9473;9474;9475;9476;9477;9478;9479;9629;10390;10391;10392;10393;10394;14851;14852;14853;15523;15524;15525;15526;15527;22255;22256;22257;22258;23248;23249;23250;23251;23252;23253;30084;30085;30086;30087;30088;30089;30090;30091;33951;33952;33953;33954;33955;34304;34305;34306;34307;34308;34309;34310;34311;34312;34313;34314;34315;34316;36660…	1337;1338;1339;1340;1341;4001;8520;8521;8522;8523;8524;8525;10102;10103;10104;10105;10106;10107;10108;10277;11081;11082;11083;11084;11085;11086;15867;15868;15869;16591;16592;16593;16594;16595;23916;23917;23918;23919;25120;25121;25122;25123;25124;25125;32433;32434;32435;32436;32437;32438;32439;32440;36586;36587;36588;36589;36590;36962;36963;36964;36965;36966;36967;36968;36969;36970;36971;36972;369…	1340;1341;4001;8522;10104;10277;11083;15869;16592;23917;25122;32434;32436;36586;36964;36972;39481;41727;42333;42679;44719;47960;55054;55059;57155					Q969G9	Q969G9
sp|Q9Y6A9|SPCS1_HUMAN Signal peptidase complex subunit 1 OS=Homo sapiens OX=9606 GN=SPCS1 PE=1 SV=4;tr|C9JBL1|C9JBL1_HUMAN Signal peptidase complex subunit 1 OS=Homo sapiens OX=9606 GN=SPCS1 PE=1 SV=1;tr|X6R2S6|X6R2S6_HUMAN Signal peptidase complex subunit	Signal peptidase complex subunit 1	SPCS1	0.800447	0.800389	-0.065349	40.2	35.3	1896200000	3302500000	948110000	1651200000	2508700000	2397600000	29	28	3	6	6	6	6	4	6	4	6	4	40.2	40.2	40.2	11.805	102	102;80;169	65.891				2639	5796;10465;10466;12632;17324;17325	True;True;True;True;True;True	6038;10981;10982;10983;10984;10985;13318;18233;18234	17538;17539;17540;17541;17542;32023;32024;32025;32026;32027;32028;32029;32030;32031;32032;32033;32034;32035;32036;32037;32038;32039;32040;32041;32042;32043;32044;32045;32046;32047;32048;32049;32050;32051;32052;38978;38979;38980;54071;54072;54073;54074;54075;54076;54077;54078;54079;54080;54081;54082;54083;54084;54085;54086;54087	18738;18739;18740;18741;18742;34506;34507;34508;34509;34510;34511;34512;34513;34514;34515;34516;34517;34518;34519;34520;34521;34522;34523;34524;34525;34526;34527;34528;34529;34530;34531;34532;34533;34534;34535;41941;41942;41943;58171;58172;58173;58174;58175;58176;58177;58178;58179;58180;58181;58182;58183;58184;58185;58186;58187;58188;58189	18738;34527;34531;41941;58182;58187		964;965		1;12	Q9Y6A9;C9JBL1;X6R2S6	Q9Y6A9;C9JBL1;X6R2S6
sp|P09874|PARP1_HUMAN Poly [ADP-ribose] polymerase 1 OS=Homo sapiens OX=9606 GN=PARP1 PE=1 SV=4	Poly [ADP-ribose] polymerase 1	PARP1	#NUM!	#NUM!	#NUM!	0	41.5	0	2487700000	0	48779000	0	2394600000	0	98	3	36	36	36	0	36	0	36	0	36	41.5	41.5	41.5	113.08	1014	1014;108;155	186.59				1201	390;398;399;1174;1334;3159;4530;4540;4788;4813;4893;5017;5792;5941;7292;7297;7559;7612;8180;9445;9446;10140;10247;10399;10740;11453;11553;12324;12673;13614;15133;15575;16114;16206;17058;17123	True;True;True;True;True;True;True;True;True;True;True;True;True;True;True;True;True;True;True;True;True;True;True;True;True;True;True;True;True;True;True;True;True;True;True;True	412;420;421;1224;1392;3290;4721;4731;4989;5014;5097;5223;6034;6189;7602;7607;7886;7941;8532;9860;9861;10574;10703;10896;10897;11312;12078;12181;12993;13360;14358;15950;16419;16983;17077;17958;18024	1232;1233;1252;1253;3489;3948;3949;3950;3951;3952;9416;9417;13523;13551;13552;13553;14358;14359;14360;14361;14430;14431;14695;14696;14697;14698;14699;15089;15090;15091;17527;17528;17529;17958;22199;22200;22210;22211;23060;23061;23234;23235;23236;23237;23238;23239;24925;28818;28819;28820;28821;30795;30796;30797;31171;31774;31775;31776;31777;31778;31779;32988;32989;32990;35381;35382;35383;35672;356…	1312;1313;1332;1333;3763;4258;4259;4260;4261;4262;10044;10045;14415;14445;14446;14447;15330;15331;15332;15333;15410;15411;15702;15703;15704;15705;15706;16117;16118;16119;18727;18728;18729;19173;23860;23861;23871;23872;24916;24917;25106;25107;25108;25109;25110;25111;26894;31087;31088;31089;31090;33161;33162;33163;33557;34239;34240;34241;34242;34243;34244;35565;35566;35567;38104;38105;38106;38414;3…	1313;1332;1333;3763;4259;10045;14415;14445;15333;15410;15702;16118;18728;19173;23860;23872;24916;25108;26894;31087;31090;33163;33557;34240;35567;38106;38416;40931;42066;45264;50737;52286;54272;54504;57300;57490		423;424		675;682	P09874;Q5VX84;Q5VX85	P09874
tr|H3BQQ9|H3BQQ9_HUMAN SUMO-conjugating enzyme UBC9 (Fragment) OS=Homo sapiens OX=9606 GN=UBE2I PE=1 SV=1;tr|B0QYN7|B0QYN7_HUMAN SUMO-conjugating enzyme UBC9 OS=Homo sapiens OX=9606 GN=UBE2I PE=1 SV=1;sp|P63279|UBC9_HUMAN SUMO-conjugating enzyme UBC9 OS=Ho	SUMO-conjugating enzyme UBC9	UBE2I	4.17797	4.178	2.85723	16.8	32.1	151840000	2748400000	21691000	392630000	326860000	2368500000	5	34	5	6	6	6	2	6	2	6	2	6	32.1	32.1	32.1	15.516	137	137;184;158;70;29	35.661				355	2034;5494;7211;7343;10474;13382	True;True;True;True;True;True	2114;5718;7514;7658;7659;10995;10996;14120	5987;5988;5989;5990;16511;16512;16513;16514;16515;16516;21931;21932;21933;21934;22335;22336;22337;22338;22339;32069;32070;32071;32072;32073;32074;32075;32076;32077;32078;32079;32080;32081;32082;41371;41372;41373	6388;6389;6390;6391;17651;17652;17653;17654;17655;17656;23566;23567;23568;23569;23999;24000;24001;24002;24003;34552;34553;34554;34555;34556;34557;34558;34559;34560;34561;34562;34563;34564;34565;34566;34567;34568;34569;34570;34571;34572;34573;44473;44474;44475	6390;17656;23569;23999;34564;44474	54	142	49	62	H3BQQ9;B0QYN7;P63279;H3BPC4;H3BRD1	H3BQQ9;B0QYN7;P63279;H3BPC4
sp|Q07065|CKAP4_HUMAN Cytoskeleton-associated protein 4 OS=Homo sapiens OX=9606 GN=CKAP4 PE=1 SV=2	Cytoskeleton-associated protein 4	CKAP4	0.999584	0.999565	0.304708	46.2	59.3	1387800000	2774800000	36521000	73020000	1916500000	2367200000	45	92	1	31	31	31	20	31	20	31	20	31	59.3	59.3	59.3	66.022	602	602	323.31				1612	1515;2235;3238;3239;3385;5130;5829;6073;6850;7917;8129;9331;9332;9427;9460;9461;9462;12116;12334;12393;13151;13537;13538;13706;14106;14312;14381;14632;15893;16777;16800	True;True;True;True;True;True;True;True;True;True;True;True;True;True;True;True;True;True;True;True;True;True;True;True;True;True;True;True;True;True;True	1578;2320;3370;3371;3533;5339;6073;6325;7134;8253;8480;9741;9742;9841;9842;9875;9876;9877;12771;13005;13067;13870;14281;14282;14453;14885;15099;15170;15427;16753;17666;17691	4493;4494;4495;6562;9640;9641;9642;9643;9644;9645;9646;9647;9648;9649;9650;10154;10155;10156;10157;15443;15444;17635;17636;17637;17638;18329;18330;18331;18332;20744;20745;20746;24208;24209;24812;24813;24814;24815;24816;24817;24818;28513;28514;28767;28768;28769;28770;28771;28772;28878;28879;28880;28881;28882;28883;28884;28885;28886;28887;28888;28889;28890;28891;28892;37408;37409;38046;38047;38048;…	4820;4821;4822;6978;10288;10289;10290;10291;10292;10293;10294;10295;10296;10297;10298;10838;10839;10840;10841;16509;16510;18838;18839;18840;18841;19581;19582;19583;19584;22300;22301;22302;26151;26152;26775;26776;26777;26778;26779;26780;26781;30759;30760;31036;31037;31038;31039;31040;31041;31152;31153;31154;31155;31156;31157;31158;31159;31160;31161;31162;31163;31164;31165;31166;40283;40284;40950;4…	4822;6978;10292;10297;10840;16509;18838;19582;22302;26152;26778;30759;30760;31039;31152;31158;31161;40284;40952;41165;43730;45003;45010;45525;46911;47637;47866;49006;53543;56363;56436		633		423	Q07065	Q07065
sp|Q14974|IMB1_HUMAN Importin subunit beta-1 OS=Homo sapiens OX=9606 GN=KPNB1 PE=1 SV=2;sp|Q14974-2|IMB1_HUMAN Isoform 2 of Importin subunit beta-1 OS=Homo sapiens OX=9606 GN=KPNB1;tr|J3KTM9|J3KTM9_HUMAN Importin subunit beta-1 (Fragment) OS=Homo sapiens O	Importin subunit beta-1	KPNB1	1.41871	1.41876	0.756212	19.6	27.9	1004200000	2684700000	25104000	67117000	1390900000	2349300000	31	73	6	25	25	25	14	23	14	23	14	23	31.2	31.2	31.2	97.169	876	876;731;690;148;248;60	274.21				1722	186;2439;4600;7769;7833;8901;9491;9895;10265;11501;11502;11718;11719;13113;13909;14152;14396;15572;15703;15786;15793;16405;16783;17307;17308	True;True;True;True;True;True;True;True;True;True;True;True;True;True;True;True;True;True;True;True;True;True;True;True;True	192;2537;4794;8103;8168;9289;9908;10321;10730;10731;12127;12128;12354;12355;13829;14679;14934;15187;16416;16557;16644;16651;17282;17672;18216;18217	533;534;535;536;537;7186;7187;7188;13755;23755;23952;23953;23954;23955;23956;23957;23958;23959;27150;27151;27152;27153;28970;28971;30175;31246;31247;31248;31249;31250;31251;31252;31253;31254;31255;31256;31257;35530;35531;35532;35533;35534;35535;35536;35537;35538;36269;36270;36271;36272;36273;36274;40536;43052;43053;43054;43055;43056;43057;43058;43846;43847;43848;43849;44627;48584;48585;48586;4909…	567;568;569;570;571;572;573;574;575;7654;7655;7656;14663;25674;25880;25881;25882;25883;25884;25885;25886;25887;25888;29281;29282;29283;29284;31244;31245;32526;33636;33637;33638;33639;33640;33641;33642;33643;33644;33645;33646;33647;38264;38265;38266;38267;38268;38269;38270;38271;38272;39070;39071;39072;39073;39074;39075;43586;46252;46253;46254;46255;46256;46257;46258;47089;47090;47091;47092;47931;…	573;7656;14663;25674;25885;29283;31244;32526;33644;38265;38272;39071;39074;43586;46257;47089;47931;52277;52852;53130;53152;55147;56378;58112;58115		679		1	Q14974;Q14974-2;J3KTM9;J3QR48;J3QKQ5;J3QRG4	Q14974;Q14974-2;J3KTM9
sp|Q00325-2|MPCP_HUMAN Isoform B of Phosphate carrier protein, mitochondrial OS=Homo sapiens OX=9606 GN=SLC25A3;sp|Q00325|MPCP_HUMAN Phosphate carrier protein, mitochondrial OS=Homo sapiens OX=9606 GN=SLC25A3 PE=1 SV=2;tr|F8VVM2|F8VVM2_HUMAN Phosphate carr	Phosphate carrier protein, mitochondrial	SLC25A3	0.522981	0.523066	-1.01032	39.9	31.6	2756100000	3960300000	153110000	220020000	4712000000	2339200000	26	63	6	22	22	22	14	17	14	17	14	17	48.2	48.2	48.2	39.958	361	361;362;324;153;154;156	49.45				1577	3035;3036;3911;4483;4957;4958;5431;5432;5513;6787;6788;9340;9341;10640;10641;10788;10789;11999;13121;15622;16646;17666	True;True;True;True;True;True;True;True;True;True;True;True;True;True;True;True;True;True;True;True;True;True	3158;3159;4081;4673;5161;5162;5653;5654;5737;5738;7067;7068;9750;9751;9752;11197;11198;11375;11376;12648;13837;16470;17528;18587	8973;8974;8975;8976;8977;8978;11745;11746;11747;11748;11749;13402;13403;14868;14869;14870;14871;14872;14873;14874;14875;14876;14877;14878;14879;14880;16352;16353;16354;16355;16356;16357;16561;16562;16563;16564;16565;20566;20567;20568;20569;20570;28535;28536;28537;28538;28539;28540;32661;32662;32663;32664;32665;32666;32667;33216;33217;33218;33219;33220;33221;33222;33223;37056;37057;37058;37059;370…	9590;9591;9592;9593;9594;9595;12532;12533;12534;12535;12536;14289;14290;14291;15884;15885;15886;15887;15888;15889;15890;15891;15892;15893;15894;15895;15896;17490;17491;17492;17493;17494;17495;17703;17704;17705;17706;17707;17708;17709;22114;22115;22116;22117;22118;22119;22120;30795;30796;30797;30798;30799;30800;30801;30802;30803;35181;35182;35183;35184;35185;35186;35187;35188;35189;35803;35804;358…	9590;9592;12535;14289;15885;15891;17491;17493;17705;22116;22120;30798;30801;35181;35184;35804;35808;39921;43603;52486;55893;59252	197	604;605;606	258	150;224;349	Q00325-2;Q00325;F8VVM2;F8VZL5;F8VWR4;F8VWQ0	Q00325-2;Q00325;F8VVM2
sp|P41252|SYIC_HUMAN Isoleucine--tRNA ligase, cytoplasmic OS=Homo sapiens OX=9606 GN=IARS PE=1 SV=2;tr|A0A0A0MSX9|A0A0A0MSX9_HUMAN Isoleucine--tRNA ligase, cytoplasmic OS=Homo sapiens OX=9606 GN=IARS PE=1 SV=1;tr|J3KR24|J3KR24_HUMAN Isoleucine--tRNA ligase	Isoleucine--tRNA ligase, cytoplasmic	IARS	1.65451	1.65446	0.949075	20.6	36	845380000	2661400000	14576000	45886000	1205200000	2326800000	36	100	5	45	45	45	18	42	18	42	18	42	37.1	37.1	37.1	144.5	1262	1262;1242;1152;330;174	289.62				1387	1239;1240;1700;2513;3007;3474;4022;4023;4106;4401;4437;4672;5388;6837;7716;7804;8186;8187;8275;8947;9434;9523;9524;10086;11546;12181;12209;13104;13161;14454;14885;14981;14982;15140;15422;15730;16029;16481;16823;16824;17430;17548;17634;17635;17872	True;True;True;True;True;True;True;True;True;True;True;True;True;True;True;True;True;True;True;True;True;True;True;True;True;True;True;True;True;True;True;True;True;True;True;True;True;True;True;True;True;True;True;True;True	1293;1294;1767;2614;3130;3627;4195;4196;4281;4589;4626;4871;5610;7120;8047;8139;8538;8539;8628;9335;9849;9941;9942;10516;12174;12837;12866;13820;13881;15245;15694;15790;15791;15957;16257;16586;16897;17359;17714;17715;18343;18464;18554;18555;18805	3689;3690;3691;3692;3693;3694;5036;5037;5038;7390;7391;8883;8884;8885;8886;10466;10467;10468;10469;10470;12065;12066;12335;12336;12337;12338;12339;12340;13207;13308;14011;14012;16230;16231;16232;20715;23578;23579;23580;23877;24938;24939;24940;24941;25183;25184;25185;25186;25187;25188;25189;25190;27271;27272;27273;28785;28786;28787;28788;28789;28790;29066;29067;29068;29069;29070;30658;30659;30660;…	3992;3993;3994;3995;3996;3997;5396;5397;5398;7861;7862;9498;9499;9500;9501;11198;11199;11200;11201;11202;11203;12872;12873;13160;13161;13162;13163;13164;13165;14089;14195;14958;14959;17359;17360;17361;22268;25484;25485;25486;25802;26907;26908;26909;26910;27164;27165;27166;27167;27168;27169;27170;27171;29409;29410;29411;31054;31055;31056;31057;31058;31059;31341;31342;31343;31344;31345;33021;33022;…	3992;3996;5396;7861;9501;11203;12872;12873;13161;14089;14195;14958;17361;22268;25485;25802;26909;26910;27171;29411;31059;31343;31344;33026;38398;40452;40543;43568;43758;48119;49802;50131;50132;50750;51754;52978;54032;55364;56486;56489;58529;58885;59140;59143;59882					P41252;A0A0A0MSX9;J3KR24;Q5TCD1;Q5TCC6	P41252;A0A0A0MSX9;J3KR24
sp|P78316|NOP14_HUMAN Nucleolar protein 14 OS=Homo sapiens OX=9606 GN=NOP14 PE=1 SV=3;tr|E9PFK5|E9PFK5_HUMAN Nucleolar protein 14 OS=Homo sapiens OX=9606 GN=NOP14 PE=1 SV=1;sp|P78316-2|NOP14_HUMAN Isoform 2 of Nucleolar protein 14 OS=Homo sapiens OX=9606 G	Nucleolar protein 14	NOP14	0.368051	0.36805	-0.314662	25.6	33.6	2168900000	2799200000	57077000	73664000	2832200000	2277200000	47	82	3	31	31	31	20	28	20	28	20	28	35.2	35.2	35.2	97.667	857	857;788;806	308.85				1562	1205;1488;1594;1878;1926;2302;2741;2995;3056;3118;3134;3738;3908;5651;5785;7250;8061;10443;10626;11482;11483;11796;12094;12748;13575;13621;13881;14114;14688;15454;16386	True;True;True;True;True;True;True;True;True;True;True;True;True;True;True;True;True;True;True;True;True;True;True;True;True;True;True;True;True;True;True	1258;1551;1658;1954;2006;2393;2850;3117;3184;3247;3264;3901;4077;4078;5883;6026;6027;7558;8404;10952;10953;11179;12107;12108;12436;12748;13440;14319;14368;14641;14642;14893;15491;16289;17263	3581;4425;4426;4427;4428;4429;4430;4431;4701;4702;4703;4704;4705;4706;5543;5544;5545;5712;5713;5714;5715;5716;6766;6767;8036;8037;8038;8039;8040;8835;9103;9104;9105;9291;9292;9293;9294;9295;9339;9340;9341;9342;9343;11190;11191;11192;11193;11194;11195;11733;11734;11735;11736;11737;11738;11739;11740;17020;17503;17504;17505;17506;17507;17508;17509;17510;17511;22051;22052;22053;22054;22055;22056;2205…	3857;4751;4752;4753;4754;4755;4756;4757;5045;5046;5047;5048;5049;5050;5928;5929;5930;6101;6102;6103;6104;6105;7192;7193;8569;8570;8571;8572;8573;9437;9724;9725;9726;9727;9917;9918;9919;9920;9921;9967;9968;9969;9970;9971;11943;11944;11945;11946;11947;11948;12520;12521;12522;12523;12524;12525;12526;12527;18203;18703;18704;18705;18706;18707;18708;18709;18710;18711;23701;23702;23703;23704;23705;23706…	3857;4756;5048;5930;6104;7192;8573;9437;9726;9919;9969;11945;12522;18203;18708;23703;26586;34422;35141;38213;38214;39255;40235;42297;45109;45293;46127;46937;49224;51848;55100		598;599;600;601		95;272;312;444	P78316;E9PFK5;P78316-2	P78316;E9PFK5;P78316-2
sp|Q8IY18|SMC5_HUMAN Structural maintenance of chromosomes protein 5 OS=Homo sapiens OX=9606 GN=SMC5 PE=1 SV=2	Structural maintenance of chromosomes protein 5	SMC5	6.23022	6.23025	5.11557	4.2	32.7	31865000	2392200000	579360	43495000	65494000	2270600000	5	108	1	38	38	38	4	38	4	38	4	38	32.7	32.7	32.7	128.81	1101	1101	183.78				2005	255;859;1074;1441;2114;2754;3310;3807;4286;5223;5742;6040;6055;7525;7562;7751;8744;9059;9376;9665;9773;9774;10001;10394;11108;11433;11473;12504;12565;12819;12820;13777;15951;16680;17047;17048;17321;17629	True;True;True;True;True;True;True;True;True;True;True;True;True;True;True;True;True;True;True;True;True;True;True;True;True;True;True;True;True;True;True;True;True;True;True;True;True;True	268;890;1111;1502;2197;2863;3453;3972;4470;5439;5981;6290;6291;6307;7852;7889;8084;9128;9448;9789;10084;10195;10196;10430;10891;11713;11714;12055;12098;13182;13248;13515;13516;14534;16812;17565;17946;17947;17948;18230;18549	821;822;2569;2570;3178;3179;4254;4255;4256;4257;6232;6233;6234;6235;6236;6237;6238;6239;8065;9919;11408;11409;11410;11411;12872;12873;12874;15712;15713;17324;17325;17326;18235;18236;18237;18238;18239;18290;18291;18292;22951;22952;23064;23065;23682;23683;23684;26690;27628;27629;27630;28644;28645;28646;29495;29496;29497;29498;29499;29824;29825;29826;29827;29828;29829;29830;29831;29832;30441;30442;3…	889;890;2798;2799;3434;3435;4568;4569;4570;4571;6644;6645;6646;6647;6648;6649;6650;6651;8604;10587;12178;12179;12180;12181;13730;13731;13732;16807;16808;18519;18520;18521;19461;19462;19463;19464;19465;19529;19530;19531;24806;24807;24920;24921;25590;25591;25592;28795;29789;29790;29791;30912;30913;30914;31798;31799;31800;31801;31802;32160;32161;32162;32163;32164;32165;32166;32167;32168;32798;32799;…	889;2798;3435;4571;6645;8604;10587;12180;13730;16808;18519;19464;19530;24806;24920;25590;28795;29790;30913;31799;32163;32165;32800;34232;36903;38016;38189;41510;41707;42550;42555;45779;53741;56038;57261;57265;58166;59122		782;783;784		313;789;1025	Q8IY18	Q8IY18
sp|Q08211|DHX9_HUMAN ATP-dependent RNA helicase A OS=Homo sapiens OX=9606 GN=DHX9 PE=1 SV=4	ATP-dependent RNA helicase A	DHX9	3.61895	3.61894	2.43202	11.4	31.3	204460000	2512000000	3351800	41180000	415290000	2241100000	16	105	2	34	34	34	11	32	11	32	11	32	33.5	33.5	33.5	140.96	1270	1270;235	323.31				1616	119;120;376;752;753;1972;2538;3094;4317;4605;4998;5220;7242;7273;7570;7757;7945;8204;8305;8381;10348;10729;10911;12007;12211;12263;12656;15372;15587;15823;16068;16798;17827;17846	True;True;True;True;True;True;True;True;True;True;True;True;True;True;True;True;True;True;True;True;True;True;True;True;True;True;True;True;True;True;True;True;True;True	123;124;397;780;781;2052;2640;3223;4502;4802;5204;5436;7549;7582;7897;8090;8283;8557;8659;8739;10835;10836;11301;11508;12656;12868;12925;13343;16206;16431;16682;16937;17689;18758;18777	347;348;349;350;351;1197;1198;1199;2192;2193;2194;2195;2196;2197;5815;5816;5817;5818;7461;7462;9220;9221;9222;12962;12963;12964;12965;12966;13806;13807;13808;15028;15706;15707;22029;22030;22031;22032;22136;22137;22138;22139;23081;23696;23697;23698;23699;23700;24278;24279;24280;24281;24282;24996;24997;24998;24999;25278;25279;25280;25529;25530;25531;25532;25533;31548;31549;31550;31551;31552;31553;3…	358;359;360;361;362;1277;1278;1279;2298;2299;2300;2301;2302;2303;2304;2305;2306;6207;6208;6209;6210;7935;7936;9846;9847;9848;13823;13824;13825;13826;13827;14730;14731;14732;16051;16801;16802;23679;23680;23681;23682;23797;23798;23799;23800;24937;25604;25605;25606;25607;25608;26224;26225;26226;26227;26228;26966;26967;26968;26969;27259;27260;27261;27585;27586;27587;27588;27589;33993;33994;33995;3399…	358;361;1277;2299;2306;6210;7936;9848;13827;14732;16051;16802;23680;23800;24937;25607;26224;26966;27261;27589;33995;35540;36235;39954;40550;40708;42018;51569;52333;53260;54124;56426;59751;59794		638;639		930;1059	Q08211;Q08211-2	Q08211
sp|O95864|FADS2_HUMAN Acyl-CoA 6-desaturase OS=Homo sapiens OX=9606 GN=FADS2 PE=1 SV=1;sp|O95864-3|FADS2_HUMAN Isoform 3 of Acyl-CoA 6-desaturase OS=Homo sapiens OX=9606 GN=FADS2;sp|O95864-4|FADS2_HUMAN Isoform 4 of Acyl-CoA 6-desaturase OS=Homo sapiens OX	Fatty acid desaturase 2	FADS2	1.33736	1.33735	0.19456	24.5	19.4	1179200000	2979700000	65512000	165540000	1948400000	2229700000	25	40	5	14	14	13	10	10	10	10	10	9	28.4	28.4	28.4	52.259	444	444;386;413;422;103	63.531				1127	469;1021;3625;3626;4110;4111;4620;5694;10046;14680;14681;16289;17335;17378	True;True;True;True;True;True;True;True;True;True;True;True;True;True	493;1057;3784;3785;4285;4286;4817;5929;10475;15483;15484;17162;18244;18291	1427;1428;1429;1430;1431;1432;1433;1434;1435;3029;3030;3031;10887;10888;10889;10890;10891;12349;12350;12351;12352;12353;12354;12355;12356;12357;12358;12359;12360;12361;12362;12363;12364;12365;12366;13852;17166;17167;17168;30558;30559;30560;30561;30562;45713;45714;45715;45716;50885;50886;50887;50888;50889;50890;50891;50892;50893;54121;54122;54123;54124;54268;54269;54270;54271	1508;1509;1510;1511;1512;1513;1514;1515;1516;3272;3273;3274;11633;11634;11635;11636;11637;13174;13175;13176;13177;13178;13179;13180;13181;13182;13183;13184;13185;13186;13187;13188;13189;13190;13191;14786;18359;18360;18361;32918;32919;32920;32921;32922;49203;49204;49205;49206;54763;54764;54765;54766;54767;54768;54769;54770;54771;58230;58231;58232;58233;58380;58381;58382;58383	1513;3272;11633;11636;13178;13190;14786;18359;32921;49203;49205;54766;58231;58380					O95864;O95864-3;O95864-4;O95864-2;E5RGZ5	O95864;O95864-3;O95864-4;O95864-2
sp|O95470|SGPL1_HUMAN Sphingosine-1-phosphate lyase 1 OS=Homo sapiens OX=9606 GN=SGPL1 PE=1 SV=3	Sphingosine-1-phosphate lyase 1	SGPL1	2.01592	2.01582	0.941439	29.8	45.2	670830000	2713100000	24846000	100480000	1156400000	2220800000	25	82	3	25	25	25	14	25	14	25	14	25	45.2	45.2	45.2	63.523	568	568;135;202	157.81				1117	171;441;704;1075;1447;1787;2094;3480;3681;4112;4961;4974;5438;5572;7075;7367;8708;9771;10533;11321;11732;15354;15555;15849;16367	True;True;True;True;True;True;True;True;True;True;True;True;True;True;True;True;True;True;True;True;True;True;True;True;True	175;464;731;1112;1508;1859;2177;3634;3840;4287;5165;5180;5660;5801;7362;7683;9091;10193;11064;11942;12368;12369;16185;16397;16398;16708;17244	493;494;495;1348;1349;1350;1351;2056;2057;3180;3181;3182;3183;3184;4282;4283;4284;4285;4286;5278;5279;5280;6172;10492;10493;11030;11031;12367;12368;12369;12370;14886;14887;14888;14889;14890;14891;14935;14936;14937;16369;16370;16371;16372;16373;16374;16749;16750;16751;21401;21402;21403;22389;22390;22391;22392;26550;26551;26552;26553;26554;26555;26556;26557;26558;26559;29819;29820;29821;29822;32261…	510;511;512;1428;1429;1430;1431;2156;2157;2158;3436;3437;3438;3439;3440;3441;3442;4601;4602;4603;4604;4605;5646;5647;5648;5649;5650;6581;11225;11226;11779;11780;13192;13193;13194;13195;15902;15903;15904;15905;15906;15907;15951;15952;15953;17508;17509;17510;17511;17512;17513;17905;17906;17907;23002;23003;23004;24054;24055;24056;24057;28643;28644;28645;28646;28647;28648;28649;28650;28651;28652;3215…	512;1430;2157;3438;4605;5647;6581;11225;11780;13193;15904;15951;17512;17907;23002;24057;28650;32157;34761;37654;39098;51492;52214;53382;55025		374;375		8;522	O95470;H0Y3V8;H7BXL7	O95470
sp|P11388|TOP2A_HUMAN DNA topoisomerase 2-alpha OS=Homo sapiens OX=9606 GN=TOP2A PE=1 SV=3;sp|P11388-2|TOP2A_HUMAN Isoform 2 of DNA topoisomerase 2-alpha OS=Homo sapiens OX=9606 GN=TOP2A;sp|P11388-3|TOP2A_HUMAN Isoform 3 of DNA topoisomerase 2-alpha OS=Hom	DNA topoisomerase 2-alpha	TOP2A	2.81066	2.81068	2.39995	10.5	33.1	330370000	2317900000	4078600	28616000	419680000	2215000000	27	111	5	49	49	37	13	47	13	47	9	35	34.9	34.9	27.8	174.38	1531	1531;1557;1567;1612;147	244.78				1227	2115;2137;3062;3136;3302;3378;3628;3650;3651;4067;4182;4423;4778;4991;5134;5480;5818;5860;6094;6317;6619;6704;7038;7264;7652;7683;9567;9568;10306;10638;10706;10802;11005;11121;11653;11990;12416;12551;12719;13546;13598;15100;15381;15382;15430;16979;17597;17894;17895	True;True;True;True;True;True;True;True;True;True;True;True;True;True;True;True;True;True;True;True;True;True;True;True;True;True;True;True;True;True;True;True;True;True;True;True;True;True;True;True;True;True;True;True;True;True;True;True;True	2198;2220;3190;3266;3445;3526;3787;3809;3810;4242;4359;4611;4979;5197;5343;5704;6061;6105;6346;6577;6892;6893;6894;6982;7324;7573;7982;8014;9985;9986;10781;11193;11194;11274;11392;11604;11727;12286;12639;13090;13232;13408;14290;14342;15913;16216;16217;16265;17876;18516;18829;18830	6240;6302;6303;6304;9126;9346;9347;9892;10138;10139;10140;10897;10898;10899;10900;10901;10902;10954;10955;12209;12210;12211;12212;12213;12214;12579;13259;13260;13261;14314;14315;14316;14317;14998;14999;15460;16484;17610;17611;17719;17720;18373;18374;18375;18376;18377;18378;19007;19979;19980;19981;19982;19983;19984;19985;19986;20274;20275;21312;21313;22100;23339;23443;29186;29187;29188;29189;29190…	6652;6718;6719;6720;9748;9974;9975;10560;10822;10823;10824;11643;11644;11645;11646;11647;11648;11702;11703;13021;13022;13023;13024;13025;13026;13411;14141;14142;14143;15286;15287;15288;15289;16021;16022;16526;17624;18811;18812;18926;18927;19625;19626;19627;19628;19629;19630;19631;20294;21327;21328;21329;21330;21331;21332;21333;21334;21658;21659;22902;22903;23756;25217;25322;31461;31462;31463;3146…	6652;6719;9748;9974;10560;10823;11647;11702;11703;13026;13411;14143;15286;16022;16526;17624;18812;18927;19631;20294;21332;21659;22903;23756;25217;25322;31462;31468;33842;35172;35460;35866;36542;36977;38818;39891;41241;41685;42180;45026;45221;50552;51596;51598;51784;57048;59032;59948;59952		444;445;446;447		228;239;537;539	P11388;P11388-2;P11388-3;P11388-4;J3KTB7	P11388;P11388-2;P11388-3;P11388-4
sp|Q96SB8|SMC6_HUMAN Structural maintenance of chromosomes protein 6 OS=Homo sapiens OX=9606 GN=SMC6 PE=1 SV=2;sp|Q96SB8-2|SMC6_HUMAN Isoform 2 of Structural maintenance of chromosomes protein 6 OS=Homo sapiens OX=9606 GN=SMC6;tr|C9JMN1|C9JMN1_HUMAN Struct	Structural maintenance of chromosomes protein 6	SMC6	6.17989	6.1799	5.09464	3.8	44.8	32068000	2324900000	509010	36903000	64575000	2206500000	4	98	4	40	40	40	3	39	3	39	3	39	44.8	44.8	44.8	126.32	1091	1091;1117;740;445	241.61				2268	531;1518;1588;1806;2007;2067;2491;2614;3102;3943;4035;4277;4302;4525;4526;4955;5330;5930;6026;6667;6720;8920;10070;10555;10743;10907;11074;11075;11889;12144;13007;13022;13734;14281;14604;14605;15314;16345;16554;17664	True;True;True;True;True;True;True;True;True;True;True;True;True;True;True;True;True;True;True;True;True;True;True;True;True;True;True;True;True;True;True;True;True;True;True;True;True;True;True;True	556;1581;1651;1880;2087;2149;2592;2719;3231;4115;4209;4461;4486;4715;4716;5159;5550;6176;6276;6945;6998;9308;10500;11089;11315;11504;11677;11678;12532;12799;13710;13726;14488;15068;15398;15399;16144;17222;17434;18585	1596;4500;4681;4682;4683;4684;4685;4686;5347;5348;5349;5350;5351;5923;5924;5925;6100;7314;7315;7316;7317;7318;7690;7691;9239;11867;12119;12120;12853;12854;12855;12912;13511;13512;14860;14861;14862;16072;16073;16074;17912;17913;17914;18205;18206;18207;18208;18209;18210;20179;20180;20181;20320;20321;20322;27205;30620;30621;32321;32322;32323;32324;32997;32998;33604;34147;34148;34149;34150;36702;3670…	1681;4827;5025;5026;5027;5028;5029;5030;5721;5722;5723;5724;5725;6324;6325;6326;6507;7782;7783;7784;7785;7786;8204;8205;9865;12669;12931;12932;13711;13712;13713;13773;14403;14404;15876;15877;15878;17195;17196;17197;19126;19127;19128;19431;19432;19433;19434;19435;19436;21556;21557;21558;21559;21710;21711;21712;29339;32983;32984;34821;34822;34823;34824;35574;35575;36221;36790;36791;36792;36793;3952…	1681;4827;5027;5723;6326;6507;7784;8205;9865;12669;12932;13711;13773;14403;14404;15878;17197;19128;19432;21557;21710;29339;32984;34824;35574;36221;36790;36793;39524;40353;43190;43243;45644;47520;48919;48922;51371;54963;55614;59250					Q96SB8;Q96SB8-2;C9JMN1;A0A0A0MRY1	Q96SB8;Q96SB8-2;C9JMN1
sp|Q9NXF1|TEX10_HUMAN Testis-expressed protein 10 OS=Homo sapiens OX=9606 GN=TEX10 PE=1 SV=2;sp|Q9NXF1-2|TEX10_HUMAN Isoform 2 of Testis-expressed protein 10 OS=Homo sapiens OX=9606 GN=TEX10	Testis-expressed sequence 10 protein	TEX10	2.95705	2.95705	1.79493	16.6	35.5	325690000	2529100000	7402000	57479000	627900000	2178800000	19	74	3	27	27	27	11	26	11	26	11	26	36.3	36.3	36.3	105.67	929	929;913;171	279.19				2467	393;1753;3304;4141;4476;5123;7107;7137;7290;8931;8983;9199;9458;9546;9853;10952;11381;11668;12285;13795;14062;14074;14910;14960;16190;16420;17306	True;True;True;True;True;True;True;True;True;True;True;True;True;True;True;True;True;True;True;True;True;True;True;True;True;True;True	415;1821;3447;4317;4666;5332;7394;7426;7600;9319;9371;9597;9873;9964;10277;11549;12002;12301;12950;14552;14841;14853;15719;15769;17060;17298;18215	1242;5179;5180;5181;9898;12449;12450;12451;12452;13384;15423;15424;15425;21486;21487;21488;21489;21490;21491;21492;21590;21591;21592;22192;22193;27229;27384;27385;27386;28090;28091;28092;28093;28094;28095;28096;28097;28873;28874;29133;29134;30039;30040;33740;33741;33742;33743;33744;33745;33746;33747;33748;33749;35133;35134;35135;35136;35137;35138;35139;35140;36089;37901;42646;42647;42648;43528;43…	1322;5546;5547;5548;10566;13279;13280;13281;13282;14271;16489;16490;16491;23091;23092;23093;23094;23095;23096;23097;23199;23200;23201;23853;23854;29363;29531;29532;29533;30270;30271;30272;30273;30274;30275;30276;30277;31147;31148;31408;31409;32383;32384;36361;36362;36363;36364;36365;36366;36367;36368;36369;36370;37841;37842;37843;37844;37845;37846;37847;37848;38863;40789;45829;45830;45831;46754;4…	1322;5547;10566;13281;14271;16490;23096;23201;23854;29363;29532;30272;31147;31408;32384;36366;37844;38863;40789;45830;46757;46785;49873;50054;54461;55206;58106					Q9NXF1;Q9NXF1-2;A0A0A0MSR3	Q9NXF1;Q9NXF1-2
sp|P51572|BAP31_HUMAN B-cell receptor-associated protein 31 OS=Homo sapiens OX=9606 GN=BCAP31 PE=1 SV=3;sp|P51572-2|BAP31_HUMAN Isoform 2 of B-cell receptor-associated protein 31 OS=Homo sapiens OX=9606 GN=BCAP31;tr|A0A2R8Y5M6|A0A2R8Y5M6_HUMAN B-cell recep	B-cell receptor-associated protein 31	BCAP31	-0.780109	-0.780109	-0.777613	46.3	37.4	3513000000	2045700000	234200000	136380000	3724300000	2172500000	39	46	8	18	18	18	16	12	16	12	16	12	46.3	46.3	46.3	27.991	246	246;313;211;182;187;188;178;138	143.03				1449	378;3655;4557;4558;7294;7649;7650;7801;8079;8080;8673;9363;9364;12028;13731;16697;17770;17771	True;True;True;True;True;True;True;True;True;True;True;True;True;True;True;True;True;True	399;400;3814;4749;4750;7604;7979;7980;8136;8428;8429;9054;9775;9776;9777;12677;14485;17584;18693;18694;18695	1201;1202;1203;1204;1205;1206;1207;10964;10965;10966;10967;10968;10969;10970;10971;10972;13611;13612;13613;13614;13615;13616;13617;13618;13619;13620;13621;22202;22203;22204;22205;22206;23329;23330;23331;23332;23863;23864;24681;24682;24683;24684;24685;24686;24687;24688;24689;26454;26455;26456;26457;26458;28587;28588;28589;28590;28591;28592;28593;28594;28595;28596;28597;37147;42451;42452;52120;5212…	1281;1282;1283;1284;1285;1286;1287;11712;11713;11714;11715;11716;11717;11718;11719;11720;14506;14507;14508;14509;14510;14511;14512;14513;14514;14515;14516;23863;23864;23865;23866;23867;25207;25208;25209;25210;25787;25788;26642;26643;26644;26645;26646;26647;26648;26649;26650;28540;28541;28542;28543;28544;30854;30855;30856;30857;30858;30859;30860;30861;30862;30863;30864;30865;40014;45630;45631;5609…	1281;11715;14506;14513;23866;25207;25210;25787;26642;26649;28541;30855;30864;40014;45630;56092;59547;59553		557;558;559		151;212;241	P51572;P51572-2;A0A2R8Y5M6;C9JSP1;C9JQ75;C9J0M4;C9JMD7;C9JM14	P51572;P51572-2;A0A2R8Y5M6;C9JSP1;C9JQ75;C9J0M4
sp|P55072|TERA_HUMAN Transitional endoplasmic reticulum ATPase OS=Homo sapiens OX=9606 GN=VCP PE=1 SV=4	Transitional endoplasmic reticulum ATPase	VCP	5.35876	5.35881	4.34611	11.4	41.9	55266000	2267800000	1228100	50396000	104430000	2123900000	8	94	3	35	35	35	7	34	7	34	7	34	42.9	42.9	42.9	89.321	806	806;115;160	323.31				1484	737;1436;1437;2025;2488;3199;3200;3283;3284;3406;3438;3538;3551;3552;4869;7077;7172;7298;7590;7798;7872;8062;8137;8659;10188;10189;10834;10835;11589;12406;12407;12662;16319;16320;17229	True;True;True;True;True;True;True;True;True;True;True;True;True;True;True;True;True;True;True;True;True;True;True;True;True;True;True;True;True;True;True;True;True;True;True	764;1496;1497;1498;2105;2588;3331;3332;3426;3427;3557;3590;3693;3706;3707;5073;7364;7468;7608;7918;8133;8207;8405;8488;9037;10629;10630;11427;11428;12217;13080;13081;13349;17195;17196;18135	2148;2149;2150;4233;4234;4235;4236;4237;4238;4239;4240;4241;4242;5969;7304;7305;7306;9537;9538;9539;9540;9541;9842;9843;9844;9845;9846;9847;9848;9849;9850;10254;10345;10346;10347;10638;10639;10640;10668;10669;10670;10671;10672;10673;10674;14620;21406;21407;21408;21409;21410;21411;21412;21789;22212;22213;23154;23155;23854;23855;23856;23857;23858;23859;24082;24083;24632;24835;24836;24837;24838;2639…	2250;2251;2252;4547;4548;4549;4550;4551;4552;4553;4554;4555;4556;6370;7772;7773;7774;10179;10180;10181;10182;10183;10510;10511;10512;10513;10514;10515;10516;10517;10518;10944;11035;11036;11037;11377;11378;11379;11380;11381;11411;11412;11413;11414;11415;11416;11417;15616;23007;23008;23009;23010;23011;23012;23013;23014;23414;23873;23874;25017;25018;25778;25779;25780;25781;25782;25783;26023;26024;26…	2251;4548;4555;6370;7772;10180;10181;10510;10517;10944;11037;11381;11412;11417;15616;23014;23414;23873;25018;25780;26024;26588;26802;28481;33334;33335;35982;35984;38509;41195;41196;42035;54900;54904;57865	185;186		8;18		P55072;C9JUP7;C9IZA5	P55072
			-2.98489	-2.98498	-2.35864	19.1	19.1	10792000000	1363200000	1798700000	227190000	10865000000	2118400000	27	18	1	8	8	8	6	5	6	5	6	5	19.1	19.1	19.1	23.583	209	209	246.55			+	474	1702;1703;1704;2281;2282;5260;16552;16553	True;True;True;True;True;True;True;True	1769;1770;1771;2369;2370;2371;2372;5476;17432;17433	5042;5043;5044;5045;5046;5047;5048;6675;6676;6677;6678;6679;6680;6681;6682;6683;6684;6685;6686;6687;6688;6689;6690;6691;6692;6693;6694;6695;6696;6697;6698;6699;6700;6701;6702;15841;51675;51676;51677	5402;5403;5404;5405;5406;5407;5408;7094;7095;7096;7097;7098;7099;7100;7101;7102;7103;7104;7105;7106;7107;7108;7109;7110;7111;7112;7113;7114;7115;7116;7117;7118;7119;7120;7121;7122;7123;7124;7125;7126;7127;16943;55611;55612;55613	5405;5407;5408;7107;7119;16943;55612;55613		178		185	CON__P02666	CON__P02666
sp|Q01105|SET_HUMAN Protein SET OS=Homo sapiens OX=9606 GN=SET PE=1 SV=3;tr|A0A0C4DFV9|A0A0C4DFV9_HUMAN Protein SET OS=Homo sapiens OX=9606 GN=SET PE=1 SV=1;sp|Q01105-3|SET_HUMAN Isoform 3 of Protein SET OS=Homo sapiens OX=9606 GN=SET;sp|Q01105-4|SET_HUMAN	Protein SET;Protein SETSIP	SET;SETSIP	#NUM!	#NUM!	#NUM!	0	50	0	2262300000	0	251370000	0	2114700000	0	34	7	14	14	14	0	14	0	14	0	14	50	50	50	33.488	290	290;266;265;268;277;292;302	193.26				1583	2794;3367;5987;5988;6705;7307;7428;9229;9572;9573;13446;16048;16049;16590	True;True;True;True;True;True;True;True;True;True;True;True;True;True	2904;3515;6236;6237;6983;7618;7747;9632;9991;9992;14186;16917;16918;17470	8167;8168;8169;8170;8171;8172;10113;10114;18089;18090;18091;18092;18093;20276;20277;22232;22233;22234;22567;22568;28172;28173;28174;29216;29217;29218;29219;29220;29221;41573;41574;41575;50222;50223;50224;50225;51789	8715;8716;8717;8718;8719;8720;10797;10798;19304;19305;19306;19307;19308;21660;21661;23893;23894;23895;24257;24258;30352;30353;30354;31491;31492;31493;31494;31495;31496;44709;44710;44711;54079;54080;54081;54082;55732	8716;10797;19305;19308;21661;23895;24258;30354;31492;31493;44711;54081;54082;55732	198		150		Q01105;A0A0C4DFV9;Q01105-3;Q01105-4;Q01105-2;A0A087X027;P0DME0	Q01105;A0A0C4DFV9;Q01105-3;Q01105-4;Q01105-2;A0A087X027;P0DME0
sp|Q96RL1|UIMC1_HUMAN BRCA1-A complex subunit RAP80 OS=Homo sapiens OX=9606 GN=UIMC1 PE=1 SV=2;sp|Q96RL1-2|UIMC1_HUMAN Isoform 2 of BRCA1-A complex subunit RAP80 OS=Homo sapiens OX=9606 GN=UIMC1;sp|Q96RL1-3|UIMC1_HUMAN Isoform 3 of BRCA1-A complex subunit	BRCA1-A complex subunit RAP80	UIMC1	1.7347	1.73472	0.861054	24.6	25.5	744330000	2477200000	18608000	61930000	1161000000	2108800000	28	53	9	22	22	22	14	17	14	17	14	17	28.1	28.1	28.1	79.727	719	719;553;641;157;166;152;349;89;31	323.31				2263	2071;2213;2502;2503;3274;3608;3609;5945;7226;7227;7365;8962;8963;9085;9086;12474;13099;14127;14128;15037;15075;15542	True;True;True;True;True;True;True;True;True;True;True;True;True;True;True;True;True;True;True;True;True;True	2153;2297;2603;2604;3412;3767;3768;6193;7533;7534;7681;9350;9351;9476;9477;13152;13814;14907;14908;15847;15885;16383	6110;6111;6485;6486;7352;7353;7354;7355;7356;7357;7358;7359;9774;10831;10832;10833;10834;10835;10836;10837;10838;10839;10840;10841;10842;17968;17969;17970;21993;21994;21995;22384;22385;22386;27312;27313;27314;27315;27316;27317;27318;27319;27320;27321;27726;27727;27728;27729;27730;27731;27732;27733;27734;27735;27736;27737;27738;38493;38494;40500;40501;40502;40503;40504;40505;40506;40507;43743;4374…	6517;6518;6901;6902;7823;7824;7825;7826;7827;7828;7829;7830;10439;11577;11578;11579;11580;11581;11582;11583;11584;11585;11586;11587;11588;19183;19184;19185;23635;23636;23637;24049;24050;24051;29450;29451;29452;29453;29454;29455;29456;29457;29458;29459;29890;29891;29892;29893;29894;29895;29896;29897;29898;29899;29900;29901;29902;41427;41428;43550;43551;43552;43553;43554;43555;43556;43557;46982;469…	6517;6902;7823;7826;10439;11578;11586;19184;23635;23636;24051;29454;29458;29897;29901;41427;43554;46983;46984;50328;50434;52167					Q96RL1;Q96RL1-2;Q96RL1-3;D6RC40;D6RCQ3;Q96RL1-5;Q96RL1-4;D6RDZ5;D6R9M3	Q96RL1;Q96RL1-2;Q96RL1-3
sp|P16435|NCPR_HUMAN NADPH--cytochrome P450 reductase OS=Homo sapiens OX=9606 GN=POR PE=1 SV=2;tr|H0Y4R2|H0Y4R2_HUMAN NADPH--cytochrome P450 reductase (Fragment) OS=Homo sapiens OX=9606 GN=POR PE=1 SV=1;tr|E7EMD0|E7EMD0_HUMAN NADPH--cytochrome P450 reducta	NADPH--cytochrome P450 reductase	POR	3.16025	3.16026	1.7645	22.7	41.7	281840000	2519600000	7617400	68099000	612290000	2080300000	19	85	5	26	26	26	10	26	10	26	10	26	41.7	41.7	41.7	76.689	677	677;725;418;101;108	299.67				1257	1122;1123;1605;1976;2530;3775;5514;6654;6785;6823;8178;8753;11048;11383;11384;12499;12865;13042;14489;14590;15335;15745;17189;17216;17498;18021	True;True;True;True;True;True;True;True;True;True;True;True;True;True;True;True;True;True;True;True;True;True;True;True;True;True	1159;1160;1669;1670;2056;2632;3939;5739;6932;7065;7106;8530;9137;11650;12004;12005;13177;13563;13747;15281;15384;16166;16601;16602;18095;18122;18411;18957	3301;3302;3303;3304;3305;4741;4742;4743;4744;4745;4746;4747;4748;5823;5824;5825;5826;5827;7444;11323;11324;11325;11326;11327;11328;16566;16567;16568;20142;20562;20563;20564;20682;20683;20684;20685;20686;20687;20688;24921;24922;24923;26724;34078;34079;34080;34081;34082;34083;34084;35142;35143;35144;35145;38556;38557;38558;38559;38560;38561;39699;39700;39701;39702;39703;40267;40268;40269;40270;4027…	3561;3562;3563;3564;3565;5094;5095;5096;5097;5098;5099;5100;5101;6215;6216;6217;6218;6219;7916;12092;12093;12094;12095;12096;12097;17710;17711;17712;21517;22110;22111;22112;22235;22236;22237;22238;22239;22240;22241;26890;26891;26892;28829;36719;36720;36721;36722;36723;36724;36725;37850;37851;37852;37853;37854;37855;37856;41490;41491;41492;41493;41494;41495;42709;42710;42711;42712;42713;43310;4331…	3564;3565;5099;6215;7916;12096;17710;21517;22111;22240;26892;28829;36720;37853;37856;41491;42713;43314;48217;48887;51443;53007;57746;57831;58738;60304		458;459		184;530	P16435;H0Y4R2;E7EMD0;E7EWU0;C9JU80	P16435;H0Y4R2;E7EMD0
sp|Q9BTV4|TMM43_HUMAN Transmembrane protein 43 OS=Homo sapiens OX=9606 GN=TMEM43 PE=1 SV=1	Transmembrane protein 43	TMEM43	-0.233425	-0.23347	-0.392835	53	59.5	2430600000	2067500000	105680000	89890000	2718900000	2070800000	51	60	2	22	22	22	20	16	20	16	20	16	61	61	61	44.875	400	400;133	234.35				2315	128;3684;3869;4658;5862;5863;5864;8104;9081;9926;11395;12339;12597;13346;13347;13826;13827;14628;15525;16391;16870;17924	True;True;True;True;True;True;True;True;True;True;True;True;True;True;True;True;True;True;True;True;True;True	132;3843;4036;4857;6107;6108;6109;8454;9472;10352;12016;13010;13282;14081;14082;14586;14587;15423;16363;17268;17765;18859	367;11037;11597;11598;11599;11600;11601;11602;11603;11604;11605;11606;11607;13973;13974;17722;17723;17724;17725;17726;17727;17728;17729;17730;17731;24753;24754;24755;24756;27702;27703;27704;27705;30240;30241;30242;30243;30244;30245;30246;35172;38065;38066;38067;38068;38069;38852;38853;38854;38855;38856;38857;41265;41266;41267;41268;41269;41270;41271;41272;41273;41274;41275;41276;41277;41278;42776…	378;11786;12380;12381;12382;12383;12384;12385;12386;12387;12388;12389;12390;14920;14921;18929;18930;18931;18932;18933;18934;18935;18936;18937;18938;26716;26717;26718;26719;29863;29864;29865;29866;29867;29868;29869;32591;32592;32593;32594;32595;32596;32597;37883;40970;40971;40972;40973;40974;41803;41804;41805;41806;41807;41808;41809;44357;44358;44359;44360;44361;44362;44363;44364;44365;44366;44367…	378;11786;12385;14920;18929;18935;18937;26717;29868;32594;37883;40971;41806;44364;44370;45974;45979;48993;52109;55109;56670;60029					Q9BTV4;V9GY05	Q9BTV4
sp|P60228|EIF3E_HUMAN Eukaryotic translation initiation factor 3 subunit E OS=Homo sapiens OX=9606 GN=EIF3E PE=1 SV=1;tr|E5RGA2|E5RGA2_HUMAN Eukaryotic translation initiation factor 3 subunit E OS=Homo sapiens OX=9606 GN=EIF3E PE=1 SV=1	Eukaryotic translation initiation factor 3 subunit E	EIF3E	0.73093	0.730915	0.103708	42.5	47.4	1552200000	2576200000	55435000	92005000	1910600000	2053000000	34	65	10	26	26	26	17	22	17	22	17	22	52.4	52.4	52.4	52.22	445	445;352;171;226;75;156;75;45;56;74	229.66				1505	414;3010;5688;5779;5917;7957;8395;8706;10315;10472;10473;10831;11299;11300;11878;12152;12447;13119;14060;14061;15605;16635;16636;17284;17754;17755	True;True;True;True;True;True;True;True;True;True;True;True;True;True;True;True;True;True;True;True;True;True;True;True;True;True	437;3133;5923;6020;6163;8297;8298;8753;8754;9089;10793;10794;10991;10992;10993;10994;11424;11915;11916;12521;12807;13125;13835;14837;14838;14839;14840;16452;17515;17516;18191;18677;18678	1292;1293;8891;8892;8893;8894;8895;8896;17135;17136;17482;17483;17484;17485;17486;17875;24319;24320;24321;24322;25571;25572;25573;25574;25575;25576;25577;25578;25579;25580;25581;25582;25583;26547;31436;31437;31438;31439;31440;31441;31442;31443;31444;32063;32064;32065;32066;32067;32068;33370;33371;33372;34869;34870;34871;34872;34873;36677;36678;37498;37499;37500;37501;37502;37503;38411;38412;38413…	1372;1373;9506;9507;9508;9509;9510;9511;18324;18325;18682;18683;18684;18685;18686;19087;26266;26267;26268;26269;27631;27632;27633;27634;27635;27636;27637;27638;27639;27640;27641;27642;27643;27644;28640;33875;33876;33877;33878;33879;33880;33881;33882;33883;33884;34546;34547;34548;34549;34550;34551;35972;35973;35974;37566;37567;37568;37569;37570;39498;39499;40374;40375;40376;40377;40378;40379;41338…	1373;9507;18325;18682;19087;26269;27644;28640;33878;34548;34550;35972;37566;37569;39499;40374;41338;43600;46747;46751;52417;55853;55857;58022;59501;59504		577;578;579;580;581;582		94;112;179;393;417;420	P60228;E5RGA2;H0YBR5;E5RHS5;E5RIT4;H0YAW4;E5RII3;E5RIP5;E5RJ25;H0YBP5	P60228;E5RGA2
sp|Q8NEW0|ZNT7_HUMAN Zinc transporter 7 OS=Homo sapiens OX=9606 GN=SLC30A7 PE=2 SV=1	Zinc transporter 7	SLC30A7	2.28087	2.28089	1.05129	14.9	21.3	536800000	2608700000	41292000	200670000	988670000	2048900000	9	42	2	9	9	9	4	9	4	9	4	9	21.3	21.3	21.3	41.625	376	376;87	63.283				2076	900;2289;3476;8658;10495;10496;10497;17280;17365	True;True;True;True;True;True;True;True;True	933;2380;3629;3630;9036;11019;11020;11021;11022;18187;18278	2683;2684;2685;2686;2687;6723;6724;10472;10473;10474;10475;10476;10477;10478;10479;10480;10481;10482;26389;26390;26391;26392;26393;32130;32131;32132;32133;32134;32135;32136;32137;32138;32139;32140;32141;32142;32143;53917;53918;53919;53920;53921;53922;54228;54229;54230	2915;2916;2917;2918;2919;7148;7149;11205;11206;11207;11208;11209;11210;11211;11212;11213;11214;11215;28474;28475;28476;28477;28478;34621;34622;34623;34624;34625;34626;34627;34628;34629;34630;34631;34632;34633;34634;34635;34636;34637;34638;34639;58008;58009;58010;58011;58012;58013;58338;58339;58340	2916;7148;11208;28478;34621;34626;34633;58013;58339		802;803		1;294	Q8NEW0;H0Y362	Q8NEW0
sp|Q8TC12|RDH11_HUMAN Retinol dehydrogenase 11 OS=Homo sapiens OX=9606 GN=RDH11 PE=1 SV=2;sp|Q8TC12-2|RDH11_HUMAN Isoform 2 of Retinol dehydrogenase 11 OS=Homo sapiens OX=9606 GN=RDH11;tr|G3V2G6|G3V2G6_HUMAN Retinol dehydrogenase 11 (Fragment) OS=Homo sapi	Retinol dehydrogenase 11	RDH11	1.40078	1.40072	0.833882	42.5	29.9	867620000	2290900000	57841000	152720000	1142400000	2036300000	19	34	8	13	13	10	11	9	11	9	8	7	45.3	45.3	34.3	35.386	318	318;305;178;186;248;118;204;316	159.98				2104	2498;2992;4766;5402;6237;7061;7455;7927;8713;14554;17140;17141;17142	True;True;True;True;True;True;True;True;True;True;True;True;True	2599;3114;4967;5624;6496;7347;7775;8264;9096;15348;18043;18044;18045	7336;7337;7338;7339;7340;7341;7342;7343;8816;8817;8818;8819;8820;8821;14294;16260;16261;16262;16263;16264;16265;18769;21364;21365;21366;21367;22640;22641;24232;24233;24234;24235;24236;24237;26570;26571;26572;26573;45335;45336;53503;53504;53505;53506;53507;53508;53509;53510;53511;53512;53513	7807;7808;7809;7810;7811;7812;7813;7814;9418;9419;9420;9421;9422;9423;15266;17390;17391;17392;17393;17394;17395;20048;22963;22964;22965;22966;24330;24331;26175;26176;26177;26178;26179;26180;28663;28664;28665;28666;48807;48808;57564;57565;57566;57567;57568;57569;57570;57571;57572;57573;57574;57575;57576	7809;9423;15266;17395;20048;22965;24330;26177;28666;48808;57570;57573;57576					Q8TC12;Q8TC12-2;G3V2G6;G3V234;Q8TC12-3;H0YIZ8;H0YJ46;Q96NR8	Q8TC12;Q8TC12-2;G3V2G6;G3V234;Q8TC12-3
sp|P51608-2|MECP2_HUMAN Isoform B of Methyl-CpG-binding protein 2 OS=Homo sapiens OX=9606 GN=MECP2;sp|P51608|MECP2_HUMAN Methyl-CpG-binding protein 2 OS=Homo sapiens OX=9606 GN=MECP2 PE=1 SV=1	Methyl-CpG-binding protein 2	MECP2	-1.71208	-1.71209	-1.53958	43	40.8	5273900000	1609700000	239720000	73167000	5761300000	1981800000	78	55	4	28	28	11	25	21	25	21	9	10	43.8	43.8	17.9	53.323	498	498;486;184;53	129.92				1450	3;4;5;6;179;345;2376;3536;3636;5271;5351;7165;7600;10583;10584;12663;12952;13130;13131;13625;13626;14421;14422;15432;15433;15453;16024;16147	True;True;True;True;True;True;True;True;True;True;True;True;True;True;True;True;True;True;True;True;True;True;True;True;True;True;True;True	3;4;5;6;185;364;2471;2472;3691;3795;5487;5571;7455;7929;11125;11126;13350;13654;13846;13847;14372;14373;15212;15213;16267;16268;16288;16892;17016	7;8;9;10;11;12;13;14;15;16;17;18;19;20;21;22;23;24;518;519;1106;1107;1108;1109;1110;6992;6993;6994;6995;6996;6997;6998;6999;7000;7001;7002;10632;10633;10634;10635;10636;10923;10924;10925;10926;10927;10928;10929;10930;10931;10932;15881;16113;16114;16115;16116;16117;21656;21657;21658;21659;21660;23194;23195;23196;23197;23198;23199;23200;32430;32431;32432;32433;32434;39068;39069;39996;39997;39998;39…	7;8;9;10;11;12;13;14;15;16;17;18;19;20;21;22;23;24;25;546;547;1186;1187;1188;1189;1190;7441;7442;7443;7444;7445;7446;7447;7448;7449;7450;7451;11371;11372;11373;11374;11375;11671;11672;11673;11674;11675;11676;11677;11678;11679;11680;16994;17238;17239;17240;17241;17242;23265;23266;23267;23268;23269;25064;25065;25066;25067;25068;25069;25070;34931;34932;34933;34934;34935;42036;42037;43027;43028;43029…	7;10;15;17;546;1186;7450;11372;11680;16994;17239;23266;25066;34931;34935;42036;43028;43635;43641;45307;45317;48013;48016;51786;51788;51847;54014;54355		32		106	P51608-2;P51608;B5MCB4;A0A1B0GTV0	P51608-2;P51608
sp|P00387-2|NB5R3_HUMAN Isoform 2 of NADH-cytochrome b5 reductase 3 OS=Homo sapiens OX=9606 GN=CYB5R3;sp|P00387|NB5R3_HUMAN NADH-cytochrome b5 reductase 3 OS=Homo sapiens OX=9606 GN=CYB5R3 PE=1 SV=3;sp|P00387-3|NB5R3_HUMAN Isoform 3 of NADH-cytochrome b5 r	NADH-cytochrome b5 reductase 3;NADH-cytochrome b5 reductase 3 membrane-bound form;NADH-cytochrome b5 reductase 3 soluble form	CYB5R3	2.10983	2.10989	1.38706	41.7	54.3	532340000	2297800000	40949000	176760000	744500000	1947200000	21	58	4	14	14	14	7	13	7	13	7	13	54.3	54.3	54.3	31.628	278	278;301;334;147	224.9				1137	1220;2074;3734;4036;5283;5990;8556;8557;10058;10059;10683;10684;14324;14386	True;True;True;True;True;True;True;True;True;True;True;True;True;True	1273;2156;3897;4210;5500;6239;8925;8926;10488;10489;11247;11248;15112;15175;15176;15177	3628;6118;6119;6120;6121;6122;11186;12121;12122;12123;15918;15919;15920;15921;15922;15923;18096;18097;18098;18099;18100;18101;18102;26071;26072;26073;26074;26075;26076;26077;26078;26079;26080;26081;26082;26083;26084;30594;30595;30596;30597;30598;32792;32793;32794;32795;32796;32797;44387;44388;44389;44390;44391;44392;44393;44581;44582;44583;44584;44585;44586;44587;44588;44589;44590;44591;44592;445…	3924;6525;6526;6527;6528;6529;11939;12933;12934;12935;17036;17037;17038;17039;17040;17041;19311;19312;19313;19314;19315;19316;19317;19318;28146;28147;28148;28149;28150;28151;28152;28153;28154;28155;28156;28157;28158;28159;32957;32958;32959;32960;32961;35319;35320;35321;35322;35323;35324;35325;47675;47676;47677;47678;47679;47680;47681;47682;47880;47881;47882;47883;47884;47885;47886;47887;47888;478…	3924;6528;11939;12935;17039;19314;28149;28159;32959;32961;35322;35325;47679;47899		387;388;389		104;154;164	P00387-2;P00387;P00387-3;B1AHF3	P00387-2;P00387;P00387-3;B1AHF3
sp|A8MV65|VGLL3_HUMAN Transcription cofactor vestigial-like protein 3 OS=Homo sapiens OX=9606 GN=VGLL3 PE=1 SV=1;sp|A8MV65-2|VGLL3_HUMAN Isoform 2 of Transcription cofactor vestigial-like protein 3 OS=Homo sapiens OX=9606 GN=VGLL3;tr|H7C571|H7C571_HUMAN Tr	Transcription cofactor vestigial-like protein 3	VGLL3	0.359316	0.359316	-0.731509	28.5	19.3	2352400000	3017700000	235240000	301770000	3158200000	1902100000	18	22	3	6	6	6	6	4	6	4	6	4	28.5	28.5	28.5	36.009	326	326;320;208	123.77				343	981;2349;5712;10358;10605;13617	True;True;True;True;True;True	1014;2443;5950;10846;10847;11153;11154;14362	2902;2903;2904;2905;2906;2907;2908;2909;6902;6903;6904;17249;17250;31567;31568;31569;31570;31571;31572;31573;31574;31575;31576;31577;32533;32534;32535;32536;32537;32538;32539;32540;32541;32542;42104;42105	3141;3142;3143;3144;3145;3146;3147;3148;3149;3150;7336;7337;7338;18443;18444;34012;34013;34014;34015;34016;34017;34018;34019;34020;34021;34022;34023;35047;35048;35049;35050;35051;35052;35053;35054;35055;35056;35057;45271;45272	3147;7336;18444;34023;35049;45271		135;136;137		51;81;127	A8MV65;A8MV65-2;H7C571	A8MV65;A8MV65-2;H7C571
tr|A0A1W2PPX5|A0A1W2PPX5_HUMAN Lysosome membrane protein 2 OS=Homo sapiens OX=9606 GN=SCARB2 PE=1 SV=1;tr|A0A1W2PQR6|A0A1W2PQR6_HUMAN Lysosome membrane protein 2 OS=Homo sapiens OX=9606 GN=SCARB2 PE=1 SV=1;tr|A0A1W2PQB7|A0A1W2PQB7_HUMAN Lysosome membrane p	Lysosome membrane protein 2	SCARB2	4.53192	4.53191	2.85999	18.5	22.7	101290000	2343200000	4404000	101880000	259280000	1882400000	7	22	13	9	9	9	4	7	4	7	4	7	28.2	28.2	28.2	49.204	432	432;449;470;475;519;478;438;335;320;141;145;206;106	53.651				237	1814;1815;4467;4715;7450;10960;12589;14456;16009	True;True;True;True;True;True;True;True;True	1888;1889;4656;4657;4915;7770;11557;13274;15247;16875	5371;5372;5373;5374;13362;13363;13364;13365;13366;13367;13368;13369;14145;14146;14147;22622;22623;22624;22625;22626;22627;22628;22629;33766;33767;38829;44806;50080;50081	5745;5746;5747;5748;14249;14250;14251;14252;14253;14254;14255;14256;15110;15111;15112;24312;24313;24314;24315;24316;24317;24318;24319;36387;36388;41777;48124;53924;53925	5747;5748;14254;15110;24319;36387;41777;48124;53925		77		356	A0A1W2PPX5;A0A1W2PQR6;A0A1W2PQB7;A0A1W2PS43;A0A1W2PRS1;Q14108;A0A1W2PPU6;Q14108-2;A0A1W2PRF6;A0A1W2PS70;A0A1W2PNX7;A0A1W2PSE4;D6RDG0	A0A1W2PPX5;A0A1W2PQR6;A0A1W2PQB7;A0A1W2PS43;A0A1W2PRS1;Q14108;A0A1W2PPU6;Q14108-2;A0A1W2PRF6
sp|P46063|RECQ1_HUMAN ATP-dependent DNA helicase Q1 OS=Homo sapiens OX=9606 GN=RECQL PE=1 SV=3	ATP-dependent DNA helicase Q1	RECQL	#NUM!	#NUM!	#NUM!	0	36.7	0	2043500000	0	58387000	0	1881800000	0	62	6	21	21	21	0	21	0	21	0	21	36.7	36.7	36.7	73.457	649	649;199;211;131;96;106	191.61				1410	977;1191;2076;2723;3563;4300;6287;6519;6916;8559;11755;11897;12029;12100;13883;15840;15841;16353;16354;17374;17399	True;True;True;True;True;True;True;True;True;True;True;True;True;True;True;True;True;True;True;True;True	1010;1243;1244;2158;2832;3719;4484;6547;6787;7200;7201;8928;12394;12540;12678;12754;14644;14645;16699;16700;17230;17231;18287;18312	2893;2894;3547;3548;3549;3550;3551;6124;7990;10704;10705;10706;12905;12906;12907;12908;12909;18912;19682;20936;20937;20938;20939;20940;26088;26089;26090;36358;36724;36725;36726;37148;37149;37150;37374;42939;42940;42941;42942;42943;42944;49540;49541;49542;49543;51077;51078;51079;51080;51081;51082;51083;51084;51085;51086;51087;51088;54260;54322;54323	3132;3133;3823;3824;3825;3826;3827;6531;8509;11447;11448;11449;13764;13765;13766;13767;13768;20196;21024;22507;22508;22509;22510;22511;28163;28164;28165;39163;39547;39548;39549;39550;40015;40016;40017;40249;46133;46134;46135;46136;46137;46138;53353;53354;53355;53356;53357;54983;54984;54985;54986;54987;54988;54989;54990;54991;54992;54993;54994;58372;58434;58435	3133;3825;6531;8509;11448;13767;20196;21024;22509;28165;39163;39547;40015;40249;46133;53353;53354;54986;54989;58372;58434		536;537;538;539		395;429;432;588	P46063;F8WA66;F8WD97;F5H2L2;F5H4P4;F5H3W0	P46063
sp|Q96EV2|RBM33_HUMAN RNA-binding protein 33 OS=Homo sapiens OX=9606 GN=RBM33 PE=1 SV=3	RNA-binding protein 33	RBM33	-0.607925	-0.607914	-0.729333	24.9	20.1	2777000000	1822100000	67732000	44442000	3116800000	1880000000	52	62	5	26	26	5	19	19	19	19	5	4	29	29	8	129.98	1170	1170;106;84;308;268	121.88				2214	37;106;107;2749;2750;3188;4025;4859;5783;5789;8717;9197;9644;10424;11041;11064;11409;12762;12800;13756;14727;15500;15680;15891;15892;16546	True;True;True;True;True;True;True;True;True;True;True;True;True;True;True;True;True;True;True;True;True;True;True;True;True;True	39;108;109;2858;2859;3319;4198;5063;6024;6031;9100;9594;9595;10063;10926;11643;11666;12031;13455;13495;14511;14512;15531;16337;16530;16751;16752;17426	104;105;106;107;108;109;110;111;112;113;114;289;290;291;292;293;8055;8056;8057;9489;9490;9491;9492;9493;12068;12069;12070;12071;12072;12073;12074;14598;17499;17500;17501;17522;17523;26582;28083;28084;28085;28086;28087;28088;29437;29438;29439;31842;31843;34060;34061;34114;34115;34116;34117;35216;35217;35218;35219;35220;39369;39370;39500;39501;39502;39503;39504;39505;42534;42535;42536;42537;42538;4…	106;107;108;109;110;111;112;113;114;115;116;117;296;297;298;299;300;8589;8590;8591;10120;10121;10122;10123;10124;12875;12876;12877;12878;12879;12880;12881;15587;18699;18700;18701;18722;18723;28675;30263;30264;30265;30266;30267;30268;31733;31734;31735;34313;34314;36701;36702;36755;36756;36757;36758;37929;37930;37931;37932;37933;42345;42346;42487;42488;42489;42490;42491;42492;45714;45715;45716;4571…	114;297;299;8590;8591;10121;12876;15587;18699;18723;28675;30266;31735;34314;36702;36758;37933;42345;42487;45722;49352;52021;52673;53527;53536;55586		235;236;832;833		301;1082;1119;1129	Q96EV2;A0A0C4DFS3;H0Y3K3;A8MTF7;Q96EV2-2	Q96EV2
sp|P05423|RPC4_HUMAN DNA-directed RNA polymerase III subunit RPC4 OS=Homo sapiens OX=9606 GN=POLR3D PE=1 SV=2;tr|E5RHT4|E5RHT4_HUMAN DNA-directed RNA polymerase III subunit RPC4 (Fragment) OS=Homo sapiens OX=9606 GN=POLR3D PE=1 SV=1	DNA-directed RNA polymerase III subunit RPC4	POLR3D	#NUM!	#NUM!	#NUM!	0	10.8	0	2206800000	0	100310000	0	1861400000	0	8	3	4	4	4	0	4	0	4	0	4	10.8	10.8	10.8	44.395	398	398;207;123	7.6798				1166	2532;3491;10467;11688	True;True;True;True	2634;3645;10986;12321	7448;7449;7450;10518;32053;32054;32055;36158	7922;7923;7924;11255;34536;34537;34538;38941	7922;11255;34538;38941					P05423;E5RHT4;E7EQ68	P05423;E5RHT4
sp|P49755|TMEDA_HUMAN Transmembrane emp24 domain-containing protein 10 OS=Homo sapiens OX=9606 GN=TMED10 PE=1 SV=2	Transmembrane emp24 domain-containing protein 10	TMED10	0.672296	0.672365	-0.179056	34.2	31.5	1470500000	2343400000	122540000	195290000	2066500000	1825300000	34	37	2	10	10	10	9	8	9	8	9	8	38.4	38.4	38.4	24.976	219	219;153	93.043				1430	5476;6684;6947;6948;7657;8103;8738;11654;12703;12704	True;True;True;True;True;True;True;True;True;True	5699;5700;6962;7232;7233;7987;8453;9122;12287;13391;13392;13393	16469;16470;16471;16472;16473;16474;16475;16476;16477;16478;16479;20224;20225;20226;20227;20228;20229;21030;21031;21032;21033;21034;21035;21036;21037;21038;21039;21040;21041;21042;21043;21044;23355;24750;24751;24752;26668;26669;26670;26671;26672;26673;36046;36047;36048;36049;36050;36051;36052;36053;36054;39166;39167;39168;39169;39170;39171;39172;39173;39174;39175;39176;39177;39178;39179;39180;391…	17609;17610;17611;17612;17613;17614;17615;17616;17617;17618;17619;21602;21603;21604;21605;21606;21607;21608;22607;22608;22609;22610;22611;22612;22613;22614;22615;22616;22617;22618;22619;22620;22621;25233;26713;26714;26715;28773;28774;28775;28776;28777;28778;38820;38821;38822;38823;38824;38825;38826;38827;38828;42135;42136;42137;42138;42139;42140;42141;42142;42143;42144;42145;42146;42147;42148;421…	17618;21608;22608;22617;25233;26714;28775;38823;42142;42153		546;547		126;168	P49755;G3V2K7	P49755
sp|Q86XP3|DDX42_HUMAN ATP-dependent RNA helicase DDX42 OS=Homo sapiens OX=9606 GN=DDX42 PE=1 SV=1;sp|Q86XP3-2|DDX42_HUMAN Isoform 2 of ATP-dependent RNA helicase DDX42 OS=Homo sapiens OX=9606 GN=DDX42;tr|A0A0A0MSJ0|A0A0A0MSJ0_HUMAN ATP-dependent RNA helica	ATP-dependent RNA helicase DDX42	DDX42	0.391509	0.391502	-0.39797	38.7	43.6	1758700000	2307000000	39970000	52431000	2389300000	1813300000	61	84	6	38	38	38	28	28	28	28	28	28	50.4	50.4	50.4	102.97	938	938;819;708;104;159;99	237.39				1983	74;686;2072;2073;2088;2275;2418;3156;3398;3399;4742;4743;4744;4987;4994;5077;5238;5517;7186;7407;7514;9242;9339;10312;10957;11131;11161;11162;12397;12398;12997;13452;14357;14553;15649;16871;16947;17113	True;True;True;True;True;True;True;True;True;True;True;True;True;True;True;True;True;True;True;True;True;True;True;True;True;True;True;True;True;True;True;True;True;True;True;True;True;True	76;713;2154;2155;2170;2363;2514;3286;3287;3547;3548;4943;4944;4945;5193;5200;5286;5454;5742;7485;7726;7840;9647;9749;10788;11554;11739;11771;11772;11773;13071;13072;13700;14192;15145;15347;16497;17766;17844;18014	207;208;209;2015;2016;6112;6113;6114;6115;6116;6117;6155;6156;6157;6158;6159;6160;6662;6663;6664;7122;7123;7124;9401;9402;9403;9404;9405;9406;9407;10197;10198;10199;10200;10201;14227;14228;14229;14230;14231;14232;14233;14234;14235;14990;14991;14992;15003;15004;15005;15006;15007;15008;15009;15010;15011;15279;15280;15281;15762;15763;15764;15765;15766;16574;16575;16576;16577;21847;21848;21849;21850;…	213;214;215;2115;2116;6519;6520;6521;6522;6523;6524;6563;6564;6565;6566;6567;6568;6569;7081;7082;7083;7589;7590;7591;10029;10030;10031;10032;10033;10034;10035;10884;10885;10886;10887;10888;15197;15198;15199;15200;15201;15202;15203;15204;15205;16013;16014;16015;16026;16027;16028;16029;16030;16031;16032;16033;16034;16340;16341;16342;16343;16857;16858;16859;16860;16861;17718;17719;17720;17721;17722;…	215;2115;6521;6524;6569;7081;7589;10033;10887;10888;15201;15203;15204;16015;16030;16343;16861;17719;23474;24200;24562;30391;30794;33857;36380;37025;37119;37124;41172;41173;43166;44731;47780;48806;52577;56674;56901;57455		779		633	Q86XP3;Q86XP3-2;A0A0A0MSJ0;J3QRI2;J3KTK9;J3KRE3	Q86XP3;Q86XP3-2;A0A0A0MSJ0
sp|P48449|ERG7_HUMAN Lanosterol synthase OS=Homo sapiens OX=9606 GN=LSS PE=1 SV=1;sp|P48449-3|ERG7_HUMAN Isoform 3 of Lanosterol synthase OS=Homo sapiens OX=9606 GN=LSS;sp|P48449-2|ERG7_HUMAN Isoform 2 of Lanosterol synthase OS=Homo sapiens OX=9606 GN=LSS;	Lanosterol synthase	LSS	3.9391	3.93912	3.45934	10.9	38.9	121380000	1861800000	3280500	50319000	162010000	1782000000	12	76	6	27	27	27	6	27	6	27	6	27	38.9	38.9	38.9	83.308	732	732;721;652;549;262;78	153.42				1419	682;1678;3374;4359;4882;5359;6504;6688;6703;9584;9705;10066;10067;11034;11366;11375;11376;11656;11854;12148;12420;12609;13559;14345;14423;14980;17419	True;True;True;True;True;True;True;True;True;True;True;True;True;True;True;True;True;True;True;True;True;True;True;True;True;True;True	708;1744;3522;4545;5086;5579;6772;6966;6981;10003;10125;10496;10497;11636;11987;11996;11997;12289;12496;12803;13094;13294;14303;15133;15214;15789;18332	1996;4975;4976;4977;4978;10129;10130;10131;10132;13082;13083;13084;14666;16149;19628;19629;19630;19631;19632;19633;20237;20238;20239;20271;20272;20273;29265;29266;29267;29616;29617;29618;30614;30615;30616;30617;34038;34039;34040;34041;34042;34043;35097;35098;35099;35100;35101;35102;35120;35121;35122;36059;36060;36061;36062;36597;36598;37487;38325;38326;38327;38892;38893;41907;44446;44447;44448;44…	2095;5334;5335;5336;5337;10813;10814;10815;10816;13956;13957;13958;15672;17274;20969;20970;20971;20972;20973;20974;21616;21617;21618;21619;21655;21656;21657;31551;31552;31553;31928;31929;31930;31931;31932;31933;31934;31935;32977;32978;32979;32980;36675;36676;36677;36678;36679;36680;36681;36682;36683;36684;37804;37805;37806;37807;37808;37809;37810;37828;37829;37830;38833;38834;38835;38836;39413;39…	2095;5335;10816;13956;15672;17274;20972;21616;21655;31551;31934;32977;32980;36681;37807;37828;37829;38836;39413;40363;41254;41846;45060;47739;48027;50130;58503					P48449;P48449-3;P48449-2;A0A0G2JQD0;C9J315;A0A0G2JS81	P48449;P48449-3;P48449-2;A0A0G2JQD0
sp|P16615|AT2A2_HUMAN Sarcoplasmic/endoplasmic reticulum calcium ATPase 2 OS=Homo sapiens OX=9606 GN=ATP2A2 PE=1 SV=1;sp|P16615-5|AT2A2_HUMAN Isoform 5 of Sarcoplasmic/endoplasmic reticulum calcium ATPase 2 OS=Homo sapiens OX=9606 GN=ATP2A2;sp|P16615-2|AT2	Sarcoplasmic/endoplasmic reticulum calcium ATPase 2	ATP2A2	1.37715	1.37719	0.317035	21.1	27.7	884950000	2298700000	19238000	49973000	1429400000	1780700000	40	88	18	25	25	25	17	24	17	24	17	24	28.3	28.3	28.3	114.76	1042	1042;997;997;999;1015;933;994;1001;869;1044;1043;50;1033;1029;999;998;1052;113	198.43				1258	579;835;1159;2101;2816;3645;4611;5846;6182;6631;6792;6793;7029;7030;7170;10576;10812;11313;12644;14337;14608;15627;15628;15970;16202	True;True;True;True;True;True;True;True;True;True;True;True;True;True;True;True;True;True;True;True;True;True;True;True;True	604;865;1206;1207;2184;2927;3804;4808;6091;6440;6907;7072;7073;7074;7315;7316;7464;7465;11115;11404;11930;13330;15125;15402;15403;16475;16476;16832;17072;17073	1716;1717;1718;1719;1720;1721;2425;2426;2427;2428;2429;2430;2431;2432;2433;3442;3443;3444;3445;3446;6184;6185;6186;6187;6188;6189;6190;6191;6192;8225;8226;8227;8228;8229;10947;10948;13831;13832;17675;17676;17677;18637;18638;18639;18640;18641;18642;20027;20579;20580;20581;20582;20583;20584;20585;20586;20587;20588;20589;21280;21281;21282;21283;21284;21773;21774;21775;21776;21777;21778;21779;32387;3…	1802;1803;1804;1805;1806;1807;2537;2538;2539;2540;2541;2542;2543;2544;2545;2546;2547;2548;3715;3716;3717;3718;3719;6593;6594;6595;6596;6597;6598;6599;6600;6601;8773;8774;8775;8776;8777;11695;11696;14763;14764;14765;18881;18882;18883;19907;19908;19909;19910;19911;19912;21390;22129;22130;22131;22132;22133;22134;22135;22136;22137;22138;22139;22857;22858;22859;22860;22861;23397;23398;23399;23400;2340…	1802;2546;3717;6596;8776;11696;14763;18881;19912;21390;22134;22138;22859;22861;23401;34888;35911;37600;41977;47714;48936;52498;52502;53806;54496		460;461;462;463;464		220;239;536;719;732	P16615;P16615-5;P16615-2;P16615-3;P16615-4;H7C5W9;O14983-2;O14983;O14983-3;Q93084-6;Q93084;J3QSY6;Q93084-7;Q93084-3;Q93084-2;Q93084-4;Q93084-5;H3BVB2	P16615;P16615-5;P16615-2;P16615-3;P16615-4;H7C5W9
tr|A0A087WXP3|A0A087WXP3_HUMAN Integrin beta OS=Homo sapiens OX=9606 GN=ITGB6 PE=1 SV=1;tr|E9PEE8|E9PEE8_HUMAN Integrin beta OS=Homo sapiens OX=9606 GN=ITGB6 PE=1 SV=1;sp|P18564-2|ITB6_HUMAN Isoform 2 of Integrin beta-6 OS=Homo sapiens OX=9606 GN=ITGB6;sp|	Integrin beta;Integrin beta-6	ITGB6	#NUM!	#NUM!	#NUM!	0	1.3	0	1748200000	0	51418000	0	1720500000	0	3	4	1	1	1	0	1	0	1	0	1	1.3	1.3	1.3	75.849	693	693;746;681;788	1.6766				66	8375	TRUE	8733	25511;25512;25513	27567;27568;27569	27568					A0A087WXP3;E9PEE8;P18564-2;P18564	A0A087WXP3;E9PEE8;P18564-2;P18564
sp|Q8IYW5|RN168_HUMAN E3 ubiquitin-protein ligase RNF168 OS=Homo sapiens OX=9606 GN=RNF168 PE=1 SV=1	E3 ubiquitin-protein ligase RNF168	RNF168	5.11387	5.11387	4.60906	7.7	35.9	52010000	1801000000	1926300	66704000	70377000	1717500000	6	77	2	22	22	22	3	22	3	22	3	22	35.9	35.9	35.9	65.019	571	571;116	130.3				2011	1145;1414;1445;3555;3656;5423;5730;7771;8551;8776;8777;8778;8799;9092;9093;11503;12537;12958;14025;14026;14380;16912	True;True;True;True;True;True;True;True;True;True;True;True;True;True;True;True;True;True;True;True;True;True	1185;1186;1474;1506;3710;3711;3815;5645;5969;8105;8920;9161;9162;9163;9184;9484;9485;12129;13218;13660;14798;14799;15169;17809	3362;3363;3364;3365;3366;3367;4178;4179;4180;4181;4182;4183;4275;4276;4277;4278;4279;10680;10681;10682;10683;10684;10685;10686;10973;16331;17299;23757;23758;26056;26057;26058;26059;26060;26061;26062;26806;26807;26808;26809;26810;26811;26812;26813;26814;26815;26816;26817;26818;26819;26820;26821;26873;26874;26875;27754;27755;27756;27757;35539;35540;35541;38701;38702;40019;40020;40021;40022;43391;43…	3624;3625;3626;3627;3628;3629;4492;4493;4494;4495;4496;4497;4594;4595;4596;4597;4598;11423;11424;11425;11426;11427;11428;11429;11721;17467;18494;25676;25677;28130;28131;28132;28133;28134;28135;28136;28137;28926;28927;28928;28929;28930;28931;28932;28933;28934;28935;28936;28937;28938;28939;28940;28941;28995;28996;28997;29918;29919;29920;29921;38273;38274;38275;38276;41646;41647;43050;43051;43052;43…	3627;4492;4597;11428;11721;17467;18494;25676;28135;28928;28933;28939;28995;29918;29921;38273;41647;43051;46615;46621;47863;56785	242	785;786	126	168;462	Q8IYW5;F8WD60	Q8IYW5
sp|O75533|SF3B1_HUMAN Splicing factor 3B subunit 1 OS=Homo sapiens OX=9606 GN=SF3B1 PE=1 SV=3	Splicing factor 3B subunit 1	SF3B1	2.56268	2.56266	1.35127	23.6	41.3	347780000	2054700000	5609400	33140000	665840000	1698800000	26	108	5	47	47	47	19	41	19	41	19	41	48.7	48.7	48.7	145.83	1304	1304;154;241;144;37	300.5				1078	84;426;765;1610;2455;3729;4826;5899;7021;7088;7125;7126;7128;7152;7536;7541;7602;8053;9133;10728;10756;11465;12197;12198;12279;12538;12909;13847;13848;14136;14409;14678;14679;14707;14899;14996;15272;15273;15366;15758;16134;16547;16835;17240;17241;17242;17244	True;True;True;True;True;True;True;True;True;True;True;True;True;True;True;True;True;True;True;True;True;True;True;True;True;True;True;True;True;True;True;True;True;True;True;True;True;True;True;True;True;True;True;True;True;True;True	86;449;793;1675;2554;3892;5028;6145;7307;7375;7414;7415;7417;7441;7863;7868;7931;8396;9525;11300;11330;12090;12854;12855;12942;13219;13611;14607;14608;14917;15200;15481;15482;15510;15708;15805;16097;16098;16198;16615;17003;17427;17726;18146;18147;18148;18150	227;228;229;1318;2222;2223;2224;4757;4758;4759;7232;7233;7234;11167;14470;14471;14472;17840;21253;21254;21255;21256;21433;21555;21556;21557;21558;21559;21560;21561;21563;21564;21565;21616;21617;21618;21619;21620;22995;22996;22997;22998;23009;23010;23011;23012;23013;23014;23203;23204;23205;24608;24609;27869;27870;27871;32960;32961;32962;33037;33038;33039;35429;35430;35431;35432;35433;35434;37626;3…	233;234;235;1398;2331;2332;2333;2334;5110;5111;5112;7700;7701;7702;11920;15455;15456;15457;19050;22830;22831;22832;22833;23037;23161;23162;23163;23164;23165;23166;23167;23169;23170;23171;23225;23226;23227;23228;23229;24851;24852;24853;24854;24865;24866;24867;24868;24869;24870;25074;25075;25076;26564;26565;30041;30042;30043;35535;35536;35537;35538;35539;35614;35615;35616;38159;38160;38161;38162;38…	235;1398;2332;5111;7701;11920;15457;19050;22833;23037;23165;23167;23171;23227;24854;24868;25076;26564;30042;35537;35614;38160;40505;40508;40759;41648;42899;46031;46034;47025;47970;49201;49202;49271;49842;50183;51243;51244;51541;53050;54319;55594;56524;57891;57895;57897;57905					O75533;B4DGZ4;H7C341;O75533-2;F8WC19	O75533
sp|Q14165|MLEC_HUMAN Malectin OS=Homo sapiens OX=9606 GN=MLEC PE=1 SV=1;tr|F5H1S8|F5H1S8_HUMAN Malectin (Fragment) OS=Homo sapiens OX=9606 GN=MLEC PE=1 SV=1;tr|H0YG07|H0YG07_HUMAN Malectin (Fragment) OS=Homo sapiens OX=9606 GN=MLEC PE=1 SV=1	Malectin	MLEC	1.63757	1.63762	0.828634	40.8	47.6	648740000	2018500000	40546000	126160000	949210000	1685800000	14	45	4	14	14	14	9	14	9	14	9	14	47.6	47.6	47.6	32.233	292	292;146;173;217	149.96				1699	1409;2149;2150;3722;7237;7238;9239;9470;9737;10079;13926;16167;16168;17789	True;True;True;True;True;True;True;True;True;True;True;True;True;True	1468;2232;2233;3883;7544;7545;9644;9885;10158;10509;14696;17036;17037;17038;18718	4166;6330;6331;6332;6333;6334;6335;11123;11124;11125;11126;11127;11128;11129;22020;22021;22022;22023;22024;22025;28203;28910;28911;28912;28913;28914;28915;29704;29705;29706;29707;29708;30638;30639;30640;30641;30642;43115;43116;43117;43118;43119;43120;50543;50544;50545;50546;50547;50548;50549;50550;50551;55478;55479;55480;55481;55482	4480;6746;6747;6748;6749;6750;6751;11874;11875;11876;11877;11878;11879;11880;23670;23671;23672;23673;23674;23675;30383;31184;31185;31186;31187;31188;31189;32037;32038;32039;32040;32041;33001;33002;33003;33004;33005;46320;46321;46322;46323;46324;46325;54409;54410;54411;54412;54413;54414;54415;54416;54417;59631;59632;59633;59634;59635;59636;59637	4480;6749;6751;11880;23670;23672;30383;31189;32041;33004;46324;54414;54416;59633		676		171	Q14165;F5H1S8;H0YG07;F5GX14	Q14165;F5H1S8;H0YG07
sp|P28288|ABCD3_HUMAN ATP-binding cassette sub-family D member 3 OS=Homo sapiens OX=9606 GN=ABCD3 PE=1 SV=1;sp|P28288-2|ABCD3_HUMAN Isoform 2 of ATP-binding cassette sub-family D member 3 OS=Homo sapiens OX=9606 GN=ABCD3	ATP-binding cassette sub-family D member 3	ABCD3	0.438094	0.438141	-0.245962	32.5	34	1505300000	2039400000	37632000	50986000	1989200000	1677400000	43	79	4	26	26	26	17	22	17	22	17	22	40.4	40.4	40.4	75.475	659	659;549;236;167	297.28				1325	1739;2214;2362;2363;2364;2851;3667;3798;4952;4996;5043;5935;6953;6954;7322;7323;7875;8332;8652;10719;12009;14299;16173;16174;16465;17761	True;True;True;True;True;True;True;True;True;True;True;True;True;True;True;True;True;True;True;True;True;True;True;True;True;True	1807;2298;2457;2458;2459;2963;3826;3963;5156;5202;5249;6181;7238;7239;7633;7634;8210;8688;9030;11289;11290;12658;15086;17043;17044;17343;18684	5144;5145;5146;6487;6488;6489;6490;6491;6492;6945;6946;6947;6948;6949;6950;6951;6952;6953;6954;8312;10994;10995;10996;10997;10998;10999;11000;11390;14855;14856;14857;15015;15016;15017;15018;15019;15020;15021;15022;15023;15024;15162;15163;15164;15165;15166;15167;15168;15169;17937;17938;17939;21054;21055;21056;21057;21058;21059;22261;22262;22263;22264;22265;22266;22267;22268;22269;24091;25386;25387…	5507;5508;5509;6903;6904;6905;6906;6907;6908;7380;7381;7382;7383;7384;7385;7386;7387;7388;7389;8863;11742;11743;11744;11745;11746;11747;11748;12160;15871;15872;15873;16038;16039;16040;16041;16042;16043;16044;16045;16046;16047;16199;16200;16201;16202;16203;16204;16205;16206;19152;19153;19154;22631;22632;22633;22634;22635;22636;23922;23923;23924;23925;23926;23927;23928;23929;23930;26032;27433;27434…	5507;6903;7380;7384;7387;8863;11748;12160;15873;16043;16205;19153;22633;22636;23922;23927;26032;27433;28458;35506;39957;47594;54430;54432;55316;59522		484		254	P28288;P28288-2;P28288-3;A0A3B3ITW3	P28288;P28288-2
sp|Q9Y5M8|SRPRB_HUMAN Signal recognition particle receptor subunit beta OS=Homo sapiens OX=9606 GN=SRPRB PE=1 SV=3;tr|H7C4H2|H7C4H2_HUMAN Signal recognition particle receptor subunit beta (Fragment) OS=Homo sapiens OX=9606 GN=SRPRB PE=1 SV=1	Signal recognition particle receptor subunit beta	SRPRB	0.860815	0.860845	-0.129861	38	32.5	1189000000	2159300000	74313000	134960000	1826200000	1669000000	26	32	2	12	12	12	10	10	10	10	10	10	39.9	39.9	39.9	29.702	271	271;160	95.041				2628	816;3581;4680;4681;4891;4892;5249;8629;8630;12929;12930;16700	True;True;True;True;True;True;True;True;True;True;True;True	845;3739;4879;4880;5095;5096;5465;9005;9006;13631;13632;17587	2360;2361;2362;2363;2364;2365;10766;10767;10768;14044;14045;14046;14047;14048;14049;14050;14685;14686;14687;14688;14689;14690;14691;14692;14693;14694;15802;15803;15804;15805;15806;15807;15808;15809;15810;26298;26299;26300;26301;26302;26303;26304;39928;39929;39930;39931;39932;39933;39934;39935;39936;39937;39938;39939;52127;52128	2470;2471;2472;2473;2474;2475;2476;11511;11512;11513;14996;14997;14998;14999;15000;15001;15002;15692;15693;15694;15695;15696;15697;15698;15699;15700;15701;16900;16901;16902;16903;16904;16905;16906;16907;16908;28382;28383;28384;28385;28386;28387;28388;28389;42957;42958;42959;42960;42961;42962;42963;42964;42965;42966;42967;42968;56097;56098	2474;11513;15001;15002;15695;15701;16904;28382;28387;42957;42967;56098					Q9Y5M8;H7C4H2	Q9Y5M8;H7C4H2
sp|Q9UBT2|SAE2_HUMAN SUMO-activating enzyme subunit 2 OS=Homo sapiens OX=9606 GN=UBA2 PE=1 SV=2;sp|Q9UBT2-2|SAE2_HUMAN Isoform 2 of SUMO-activating enzyme subunit 2 OS=Homo sapiens OX=9606 GN=UBA2	SUMO-activating enzyme subunit 2	UBA2	#NUM!	#NUM!	#NUM!	0	44.5	0	1712800000	0	59064000	0	1664400000	0	55	7	23	23	23	0	23	0	23	0	23	44.5	44.5	44.5	71.223	640	640;544;262;215;166;54;74	113.35				2513	1187;2353;3082;3477;3742;4659;6063;7453;7614;7615;8018;8265;9621;10378;11890;14111;14297;14952;16232;17032;17705;17722;17723	True;True;True;True;True;True;True;True;True;True;True;True;True;True;True;True;True;True;True;True;True;True;True	1238;1239;2447;3211;3631;3905;4858;6315;7773;7943;7944;8361;8618;10040;10872;12533;14890;15084;15761;17104;17931;18626;18643;18644	3530;3531;3532;3533;6910;9185;9186;9187;10483;10484;10485;11204;11205;13975;18305;18306;22635;23242;23243;23244;24512;25160;25161;25162;25163;25164;29359;29360;31705;31706;36705;36706;36707;43701;43702;44297;44298;46494;46495;50719;50720;50721;53165;55201;55202;55203;55204;55205;55262;55263;55264;55265;55266;55267	3806;3807;3808;3809;7344;9810;9811;9812;11216;11217;11218;11959;11960;14922;19546;19547;24325;25114;25115;25116;26465;27141;27142;27143;27144;27145;31649;31650;34169;34170;39526;39527;39528;46931;46932;47582;47583;50035;50036;54589;54590;54591;57206;59344;59345;59346;59347;59348;59349;59409;59410;59411;59412;59413;59414	3807;7344;9810;11217;11960;14922;19547;24325;25114;25115;26465;27141;31649;34170;39526;46931;47582;50035;54590;57206;59348;59409;59412		929		97	Q9UBT2;Q9UBT2-2;K7EPL2;K7ESK7;U3KQ93;U3KQ55;K7ES38	Q9UBT2;Q9UBT2-2
sp|P54136|SYRC_HUMAN Arginine--tRNA ligase, cytoplasmic OS=Homo sapiens OX=9606 GN=RARS PE=1 SV=2;sp|P54136-2|SYRC_HUMAN Isoform Monomeric of Arginine--tRNA ligase, cytoplasmic OS=Homo sapiens OX=9606 GN=RARS	Arginine--tRNA ligase, cytoplasmic	RARS	1.97457	1.97459	0.873482	24.4	38.6	530800000	2086100000	14346000	56382000	906620000	1661000000	30	80	4	29	29	29	15	29	15	29	15	29	38.6	38.6	38.6	75.378	660	660;588;129;113	140.29				1472	206;2930;3815;4725;4809;5251;6526;7104;7105;7659;7926;8234;9062;9063;9064;9175;9222;9412;10452;10552;10553;11309;13051;13835;13836;14301;16086;16087;16339	True;True;True;True;True;True;True;True;True;True;True;True;True;True;True;True;True;True;True;True;True;True;True;True;True;True;True;True;True	212;3049;3980;4926;5010;5467;6795;7391;7392;7989;8263;8587;9451;9452;9453;9569;9624;9826;10963;10964;11086;11087;11926;13756;14595;14596;15088;16955;16956;17216	582;583;584;585;8604;8605;11424;11425;14178;14179;14180;14181;14420;14421;14422;14423;14424;15814;15815;15816;15817;19711;19712;19713;19714;21472;21473;21474;21475;21476;21477;23359;23360;24227;24228;24229;24230;24231;25080;25081;25082;25083;27633;27634;27635;27636;27637;27638;27639;27640;27641;27642;27643;27644;27645;28013;28014;28015;28016;28017;28018;28019;28158;28159;28738;28739;28740;28741;3…	620;621;622;623;624;9201;9202;12194;12195;15144;15145;15146;15147;15400;15401;15402;15403;15404;16912;16913;16914;16915;21055;21056;21057;21058;23077;23078;23079;23080;23081;23082;25237;25238;26170;26171;26172;26173;26174;27056;27057;27058;27059;29794;29795;29796;29797;29798;29799;29800;29801;29802;29803;29804;29805;29806;30193;30194;30195;30196;30197;30198;30199;30338;30339;31007;31008;31009;310…	623;9202;12194;15147;15403;16912;21055;23080;23081;25238;26174;27059;29796;29801;29804;30199;30338;31008;34461;34813;34818;37591;43334;46001;46004;47597;54168;54169;54946		563		523	P54136;P54136-2;E5RJM9;E5RH09	P54136;P54136-2
tr|C9JA28|C9JA28_HUMAN Translocon-associated protein subunit gamma OS=Homo sapiens OX=9606 GN=SSR3 PE=1 SV=1;sp|Q9UNL2|SSRG_HUMAN Translocon-associated protein subunit gamma OS=Homo sapiens OX=9606 GN=SSR3 PE=1 SV=1;sp|Q9UNL2-2|SSRG_HUMAN Isoform 2 of Tran	Translocon-associated protein subunit gamma	SSR3	0.0611972	0.0611972	-0.629403	19.5	19	1892400000	1974400000	378480000	394880000	2554900000	1651600000	17	10	4	5	5	5	5	3	5	3	5	3	19.5	19.5	19.5	20.161	174	174;185;198;133	85.332				440	2719;5437;12322;12558;15882	True;True;True;True;True	2828;5659;12991;13239;16742	7971;16365;16366;16367;16368;38012;38013;38014;38015;38016;38017;38018;38019;38020;38021;38022;38023;38024;38025;38026;38746;49675;49676;49677;49678;49679;49680	8489;17504;17505;17506;17507;40914;40915;40916;40917;40918;40919;40920;40921;40922;40923;40924;40925;40926;40927;40928;41693;53494;53495;53496;53497;53498;53499	8489;17507;40924;41693;53497					C9JA28;Q9UNL2;Q9UNL2-2;C9J365	C9JA28;Q9UNL2;Q9UNL2-2;C9J365
sp|Q8IVM0|CCD50_HUMAN Coiled-coil domain-containing protein 50 OS=Homo sapiens OX=9606 GN=CCDC50 PE=1 SV=1;sp|Q8IVM0-2|CCD50_HUMAN Isoform 2 of Coiled-coil domain-containing protein 50 OS=Homo sapiens OX=9606 GN=CCDC50	Coiled-coil domain-containing protein 50	CCDC50	3.31058	3.31053	2.80906	32.7	61.4	174810000	1734400000	10926000	108400000	235250000	1648700000	10	46	2	20	20	20	7	20	7	20	7	20	61.4	61.4	61.4	35.822	306	306;482	155.16				1994	148;409;410;1774;1932;2339;6744;7418;7528;7894;7895;8996;9049;9978;10138;11464;12157;12158;12159;16660	True;True;True;True;True;True;True;True;True;True;True;True;True;True;True;True;True;True;True;True	152;431;432;433;1843;1844;1845;2012;2432;7023;7737;7855;8229;8230;9384;9438;10404;10570;12089;12812;12813;12814;17544	426;427;428;429;430;431;1279;1280;1281;1282;1283;1284;1285;5223;5224;5225;5226;5227;5228;5229;5230;5231;5232;5233;5234;5725;5726;5727;6873;6874;6875;20448;20449;22535;22536;22964;22965;22966;22967;22968;22969;24142;24143;24144;24145;24146;24147;27435;27436;27588;27589;30380;30381;30382;30383;30384;30385;30781;30782;30783;30784;30785;30786;30787;35428;37517;37518;37519;37520;37521;37522;52006;52007	442;443;444;445;446;447;1359;1360;1361;1362;1363;1364;1365;5591;5592;5593;5594;5595;5596;5597;5598;5599;5600;5601;5602;6114;6115;6116;7303;7304;7305;21996;21997;24225;24226;24819;24820;24821;24822;24823;24824;26085;26086;26087;26088;26089;26090;29582;29583;29746;29747;32734;32735;32736;32737;32738;32739;33147;33148;33149;33150;33151;33152;33153;38158;40393;40394;40395;40396;40397;40398;55968;55969	445;1360;1362;5595;6116;7305;21996;24226;24824;26089;26090;29583;29747;32739;33151;38158;40393;40396;40398;55968	240;241	780	10;152	151	Q8IVM0;Q8IVM0-2	Q8IVM0;Q8IVM0-2
sp|Q12797|ASPH_HUMAN Aspartyl/asparaginyl beta-hydroxylase OS=Homo sapiens OX=9606 GN=ASPH PE=1 SV=3;sp|Q12797-10|ASPH_HUMAN Isoform 10 of Aspartyl/asparaginyl beta-hydroxylase OS=Homo sapiens OX=9606 GN=ASPH	Aspartyl/asparaginyl beta-hydroxylase	ASPH	0.804561	0.804503	0.27718	26.5	26.9	1063200000	1857000000	35442000	61901000	1346400000	1631600000	32	70	18	26	26	26	16	21	16	21	16	21	35.9	35.9	35.9	85.862	758	758;729;136;294;195;327;313;270;256;299;298;198;186;203;113;174;225;210	222.62				1637	359;1343;2855;4507;4588;4684;5041;5102;5415;5907;5908;7783;8401;8402;8403;8578;8631;10379;12295;13870;14176;14967;14968;16258;16483;17172	True;True;True;True;True;True;True;True;True;True;True;True;True;True;True;True;True;True;True;True;True;True;True;True;True;True	378;1401;2968;4697;4782;4883;5247;5311;5637;6153;6154;8118;8760;8761;8762;8951;9007;9008;10873;12961;14630;14959;15776;15777;17131;17361;18078	1138;1139;1140;3971;3972;3973;8323;8324;8325;8326;13456;13457;13458;13711;13712;13713;13714;13715;13716;13717;13718;14057;14058;14059;14060;14061;14062;15156;15157;15158;15159;15160;15363;15364;15365;15366;15367;15368;15369;15370;15371;16303;16304;16305;16306;16307;17856;17857;17858;17859;23809;23810;23811;23812;23813;25592;25593;25594;25595;25596;26177;26178;26305;26306;26307;26308;26309;26310;3…	1218;1219;1220;4281;4282;4283;8874;8875;8876;8877;14347;14348;14349;14614;14615;14616;14617;14618;14619;14620;14621;15009;15010;15011;15012;15013;15014;16193;16194;16195;16196;16197;16426;16427;16428;16429;16430;16431;16432;16433;16434;17434;17435;17436;17437;17438;19066;19067;19068;19069;19070;25733;25734;25735;25736;25737;27653;27654;27655;27656;27657;28256;28257;28390;28391;28392;28393;28394;2…	1218;4282;8877;14349;14621;15014;16195;16433;17437;19067;19070;25734;27653;27654;27656;28256;28393;34174;40830;46096;47160;50090;50091;54675;55370;57672		643		605	Q12797;Q12797-10;E5RHK2;Q12797-11;A0A087WW51;E5RG56;Q12797-2;Q12797-6;Q12797-9;Q12797-8;Q12797-5;E5RG29;A0A087WUJ2;Q12797-7;E5RHJ2;G3XAN5;Q12797-3;Q12797-4	Q12797;Q12797-10
sp|P46977|STT3A_HUMAN Dolichyl-diphosphooligosaccharide--protein glycosyltransferase subunit STT3A OS=Homo sapiens OX=9606 GN=STT3A PE=1 SV=2;sp|P46977-2|STT3A_HUMAN Isoform 2 of Dolichyl-diphosphooligosaccharide--protein glycosyltransferase subunit STT3A	Dolichyl-diphosphooligosaccharide--protein glycosyltransferase subunit STT3A	STT3A	2.25861	2.25859	1.34657	10.6	16.3	401290000	1920300000	13838000	66218000	636160000	1617800000	14	32	6	14	13	13	8	11	8	10	8	10	17.9	17.9	17.9	80.529	705	705;613;102;117;119;194	109.06				1415	1771;2717;3288;3289;3840;3958;3959;4047;4534;6306;6307;10809;11146;16195	False;True;True;True;True;True;True;True;True;True;True;True;True;True	1840;2826;3431;3432;4006;4131;4132;4221;4725;6566;6567;11400;11755;17065	5214;5215;7966;7967;7968;7969;9855;9856;9857;9858;9859;11492;11493;11494;11903;11904;11905;11906;11907;11908;12145;12146;12147;12148;12149;12150;13532;13533;18963;18964;18965;18966;18967;18968;18969;18970;33299;33300;33301;33302;33303;33304;33305;33306;33307;34411;34412;50603	5582;5583;8484;8485;8486;8487;10523;10524;10525;10526;10527;12269;12270;12271;12709;12710;12711;12712;12713;12714;12957;12958;12959;12960;12961;12962;14424;14425;20248;20249;20250;20251;20252;20253;20254;20255;35890;35891;35892;35893;35894;35895;35896;35897;35898;37081;37082;54470	5583;8485;10525;10526;12271;12711;12714;12957;14425;20249;20253;35895;37081;54470					P46977;P46977-2;A0A0C4DH80;E9PN73;E9PI32;H0YET6	P46977;P46977-2
sp|Q08AF3|SLFN5_HUMAN Schlafen family member 5 OS=Homo sapiens OX=9606 GN=SLFN5 PE=1 SV=1;tr|B4E128|B4E128_HUMAN Schlafen family member 5 OS=Homo sapiens OX=9606 GN=SLFN5 PE=1 SV=1;sp|Q08AF3-2|SLFN5_HUMAN Isoform 2 of Schlafen family member 5 OS=Homo sapie	Schlafen family member 5	SLFN5	2.97211	2.97209	0.842199	13.4	22.7	285810000	2242700000	7145300	56067000	898660000	1611100000	20	87	7	23	23	23	11	23	11	23	11	23	22.7	22.7	22.7	101.05	891	891;389;338;901;50;579;897	323.31				1619	353;2045;3042;3063;3115;3297;3410;3652;4003;5701;6008;10622;10817;11335;11336;12243;14694;15528;16984;17144;17145;17529;17971	True;True;True;True;True;True;True;True;True;True;True;True;True;True;True;True;True;True;True;True;True;True;True	372;2125;3165;3191;3244;3440;3561;3811;4176;5936;6257;11175;11409;11956;11957;12905;15497;16366;16367;17881;18047;18048;18442;18907	1129;6020;6021;6022;8995;8996;8997;8998;8999;9127;9128;9129;9278;9279;9280;9281;9282;9283;9284;9876;9877;9878;9879;9880;9881;10264;10956;10957;10958;12016;17182;17183;17184;17185;17186;17187;18151;18152;18153;18154;18155;32606;32607;32608;32609;32610;33330;33331;33332;33333;33334;33335;33336;35000;35001;35002;35003;35004;35005;35006;35007;35008;35009;35010;35011;35012;35013;35014;35015;35016;3501…	1209;6422;6423;6424;9612;9613;9614;9615;9616;9749;9750;9751;9904;9905;9906;9907;9908;9909;9910;10544;10545;10546;10547;10548;10549;10954;11704;11705;11706;12822;18375;18376;18377;18378;18379;18380;19374;19375;19376;19377;19378;35125;35126;35127;35128;35129;35922;35923;35924;35925;35926;35927;35928;35929;35930;35931;35932;35933;35934;35935;35936;35937;35938;37700;37701;37702;37703;37704;37705;3770…	1209;6424;9613;9749;9906;10547;10954;11706;12822;18377;19376;35127;35924;37705;37714;40651;49235;52116;57065;57584;57587;58827;60163	205	640	65	128	Q08AF3;B4E128;Q08AF3-2;Q7Z7L1;K7EJJ3;Q68D06-2;Q68D06	Q08AF3;B4E128;Q08AF3-2
sp|O95948|ONEC2_HUMAN One cut domain family member 2 OS=Homo sapiens OX=9606 GN=ONECUT2 PE=2 SV=2	One cut domain family member 2	ONECUT2	0.202182	0.202117	-0.212172	30.8	30	1556800000	1791000000	91578000	105350000	1854300000	1600700000	32	37	2	18	18	14	13	14	13	14	10	11	35.1	35.1	27.8	54.303	504	504;494	154.56				1132	207;3401;3402;4553;5152;5276;6941;9648;9915;9916;10515;14035;14036;14122;15128;15129;17329;17898	True;True;True;True;True;True;True;True;True;True;True;True;True;True;True;True;True;True	213;3550;3551;4745;5362;5492;7226;10067;10341;10342;11044;14811;14812;14902;15945;15946;18238;18833	586;10212;10213;10214;10215;10216;10217;10218;10219;10220;13602;13603;13604;13605;13606;15505;15506;15507;15508;15888;15889;15890;15891;15892;21016;21017;21018;29449;30211;30212;30213;30214;30215;30216;30217;32205;32206;32207;32208;32209;32210;32211;32212;32213;43438;43439;43440;43441;43734;47114;47115;47116;47117;47118;47119;47120;47121;54099;54100;54101;54102;55778;55779;55780;55781;55782;55783	625;10901;10902;10903;10904;10905;10906;10907;10908;10909;14497;14498;14499;14500;14501;16572;16573;16574;16575;16576;17001;17002;17003;17004;17005;22593;22594;22595;31745;32562;32563;32564;32565;32566;32567;32568;34704;34705;34706;34707;34708;34709;34710;34711;34712;46661;46662;46663;46664;46973;50721;50722;50723;50724;50725;50726;50727;50728;58202;58203;58204;58205;59956;59957;59958;59959;59960…	625;10904;10907;14501;16576;17005;22594;31745;32562;32568;34711;46662;46663;46973;50722;50725;58205;59959					O95948;O60422	O95948
sp|P12004|PCNA_HUMAN Proliferating cell nuclear antigen OS=Homo sapiens OX=9606 GN=PCNA PE=1 SV=1	Proliferating cell nuclear antigen	PCNA	7.45958	7.45956	#NUM!	2.7	57.1	9392800	1653300000	587050	103330000	0	1595200000	1	39	1	11	11	11	1	11	1	11	1	11	57.1	57.1	57.1	28.768	261	261	152.74				1228	325;326;1582;4310;9704;9977;10597;11136;13160;17731;18010	True;True;True;True;True;True;True;True;True;True;True	342;343;1645;4494;10124;10403;11141;11744;11745;13880;18653;18946	1026;1027;1028;1029;1030;1031;1032;4662;4663;4664;4665;4666;4667;4668;12925;12926;12927;29613;29614;29615;30378;30379;32500;34371;34372;34373;40696;40697;40698;55282;55283;55284;55285;56094	1104;1105;1106;1107;1108;1109;1110;5003;5004;5005;5006;5007;5008;5009;5010;5011;5012;13786;13787;13788;31922;31923;31924;31925;31926;31927;32732;32733;35010;37038;37039;37040;43753;43754;43755;59429;59430;59431;59432;60277	1107;1109;5011;13787;31922;32732;35010;37038;43755;59429;60277		448;449;450		68;75;139	P12004	P12004
sp|P20264|PO3F3_HUMAN POU domain, class 3, transcription factor 3 OS=Homo sapiens OX=9606 GN=POU3F3 PE=2 SV=2	POU domain, class 3, transcription factor 3	POU3F3	-0.729999	-0.730048	-1.29756	13.2	21.4	3112600000	1876600000	389080000	234570000	3915800000	1593000000	21	29	10	10	10	6	7	8	7	8	3	4	24.8	24.8	16.8	50.326	500	500;244;263;443;451;190;190;265;359;360	197.65				1284	1905;3819;4594;4816;10727;11725;11726;15487;17314;17315	True;True;True;True;True;True;True;True;True;True	1983;3984;4788;5017;11299;12361;12362;16324;18223;18224	5618;5619;11430;11431;11432;11433;11434;11435;13729;13730;13731;13732;13733;13734;13735;14439;14440;14441;14442;14443;14444;32955;32956;32957;32958;32959;36281;36282;36283;36284;48307;48308;48309;48310;48311;48312;54036;54037;54038;54039;54040;54041;54042;54043;54044;54045;54046	6005;6006;12200;12201;12202;12203;12204;12205;14632;14633;14634;14635;14636;14637;14638;14639;15419;15420;15421;15422;15423;15424;35528;35529;35530;35531;35532;35533;35534;39082;39083;39084;39085;51986;51987;51988;51989;51990;51991;58136;58137;58138;58139;58140;58141;58142;58143;58144;58145;58146	6005;12205;14639;15420;35530;39083;39084;51988;58139;58146					P20264;P20265-3;P20265-2;P20265;Q03052;U3KQH6;M1S623;Q01860-2;Q06416;Q01860	P20264
sp|P78395|PRAME_HUMAN Melanoma antigen preferentially expressed in tumors OS=Homo sapiens OX=9606 GN=PRAME PE=1 SV=1;tr|H7C2P3|H7C2P3_HUMAN Melanoma antigen preferentially-expressed in tumors (Fragment) OS=Homo sapiens OX=9606 GN=PRAME PE=1 SV=1;tr|E7EW99|	Melanoma antigen preferentially expressed in tumors	PRAME	5.61858	5.61861	5.16092	6.1	27.5	34656000	1702700000	1506800	74033000	44362000	1587100000	4	39	11	14	14	12	2	14	2	14	2	12	27.5	27.5	27.5	57.889	509	509;189;201;149;152;115;86;114;483;474;474	51.455				1567	1470;1669;3111;4354;5353;6090;8718;9514;9515;9905;11489;17293;17294;17650	True;True;True;True;True;True;True;True;True;True;True;True;True;True	1531;1735;3240;4540;5573;6342;9101;9932;9933;10331;12114;18201;18202;18571	4355;4356;4357;4934;4935;4936;4937;4938;9265;9266;13073;13074;13075;16120;16121;16122;16123;18362;18363;18364;26583;26584;29030;29031;29032;29033;29034;29035;29036;30196;35494;35495;35496;35497;35498;35499;53964;53965;53966;55051	4678;4679;4680;4681;4682;5291;5292;5293;5294;5295;9891;9892;13946;13947;13948;13949;17245;17246;17247;17248;19614;19615;19616;28676;28677;31305;31306;31307;31308;31309;31310;31311;32547;38227;38228;38229;38230;38231;38232;58055;58056;58057;59193	4682;5295;9891;13949;17246;19616;28676;31306;31310;32547;38232;58056;58057;59193					P78395;H7C2P3;E7EW99;A0A0G2JRX7;E7EMH2;B5MCY4;B5MD04;A0A0G2JRX8;O95522;Q5VXH5;Q5VWM4	P78395;H7C2P3;E7EW99;A0A0G2JRX7;E7EMH2
sp|O75165|DJC13_HUMAN DnaJ homolog subfamily C member 13 OS=Homo sapiens OX=9606 GN=DNAJC13 PE=1 SV=5	DnaJ homolog subfamily C member 13	DNAJC13	5.189	5.18903	4.65819	3.3	21.1	46983000	1713900000	419490	15303000	62393000	1575400000	8	76	3	36	36	36	5	35	5	35	5	35	21.5	21.5	21.5	254.41	2243	2243;631;173	105.28				1066	364;1359;1611;2300;3144;3295;3420;4139;4207;4304;5308;5886;6167;6556;6804;7026;7447;7684;7988;8387;8388;8501;8961;10494;10610;13152;13153;13414;13919;14484;14712;15008;15452;17267;17429;17916	True;True;True;True;True;True;True;True;True;True;True;True;True;True;True;True;True;True;True;True;True;True;True;True;True;True;True;True;True;True;True;True;True;True;True;True	384;1417;1676;2391;3274;3438;3571;4315;4388;4488;5526;6132;6424;6826;7086;7312;7766;8015;8331;8745;8746;8866;9349;11018;11160;13871;13872;14152;14689;15275;15515;15818;16287;18174;18342;18851	1152;1153;1154;1155;1156;4009;4760;4761;4762;6764;9363;9364;9365;9873;9874;10294;10295;10296;10297;12446;12447;12656;12916;15997;15998;17801;17802;18593;19812;19813;19814;19815;19816;19817;20618;20619;20620;21274;22612;22613;22614;23444;24444;25544;25545;25546;25547;25548;25905;27311;32128;32129;32559;32560;32561;40675;40676;40677;40678;40679;40680;41470;41471;41472;41473;43098;43099;43100;44880;…	1232;1233;1234;1235;1236;4319;5113;5114;5115;7190;9991;9992;9993;10541;10542;10984;10985;10986;10987;13276;13277;13489;13777;17118;17119;19011;19012;19861;21159;21160;21161;21162;21163;21164;22168;22169;22170;22171;22851;24302;24303;24304;25323;26395;27600;27601;27602;27603;27604;27977;29449;34619;34620;35074;35075;35076;43731;43732;43733;43734;43735;43736;44600;44601;44602;44603;46303;46304;4630…	1236;4319;5114;7190;9992;10541;10985;13277;13489;13777;17118;19012;19861;21162;22169;22851;24302;25323;26395;27602;27603;27977;29449;34620;35075;43731;43736;44602;46304;48199;49288;50254;51843;57973;58528;60005					O75165;A0A3B3IRM0;H0Y8Q2	O75165
sp|O95551|TYDP2_HUMAN Tyrosyl-DNA phosphodiesterase 2 OS=Homo sapiens OX=9606 GN=TDP2 PE=1 SV=1;sp|O95551-2|TYDP2_HUMAN Isoform 2 of Tyrosyl-DNA phosphodiesterase 2 OS=Homo sapiens OX=9606 GN=TDP2;sp|O95551-3|TYDP2_HUMAN Isoform 3 of Tyrosyl-DNA phosphodie	Tyrosyl-DNA phosphodiesterase 2	TDP2	5.04047	5.04048	4.3282	15.2	36.7	50838000	1673100000	3177400	104570000	77164000	1550000000	5	58	4	16	16	16	3	16	3	16	3	16	36.7	36.7	36.7	40.929	362	362;392;284;304	212.42				1120	28;1062;1063;2576;2577;7565;7566;8752;10606;10607;12784;13664;14018;14222;14223;15775	True;True;True;True;True;True;True;True;True;True;True;True;True;True;True;True	30;1099;1100;2680;2681;7892;7893;9136;11155;11156;11157;13478;14411;14789;15007;15008;16632	75;76;77;78;3140;3141;3142;3143;3144;3145;3146;3147;7588;7589;7590;7591;23070;23071;23072;23073;23074;23075;23076;23077;26719;26720;26721;26722;26723;32543;32544;32545;32546;32547;32548;32549;32550;32551;32552;32553;32554;39443;39444;42245;42246;43356;43357;43358;44040;44041;44042;44043;44044;44045;44046;44047;44048;44049;49320;49321;49322;49323	76;77;78;79;80;3390;3391;3392;3393;3394;3395;3396;3397;3398;3399;3400;8077;8078;8079;8080;24926;24927;24928;24929;24930;24931;24932;24933;28824;28825;28826;28827;28828;35058;35059;35060;35061;35062;35063;35064;35065;35066;35067;35068;35069;42420;42421;45417;45418;46577;46578;46579;47288;47289;47290;47291;47292;47293;47294;47295;47296;47297;53098;53099;53100;53101	77;3394;3399;8077;8080;24926;24933;28826;35060;35067;42420;45417;46579;47288;47294;53099	124;125	376	23;82	248	O95551;O95551-2;O95551-3;X6R5A3	O95551;O95551-2;O95551-3;X6R5A3
tr|Q5T8U5|Q5T8U5_HUMAN Surfeit 4 OS=Homo sapiens OX=9606 GN=SURF4 PE=1 SV=1;sp|O15260-2|SURF4_HUMAN Isoform 2 of Surfeit locus protein 4 OS=Homo sapiens OX=9606 GN=SURF4;sp|O15260|SURF4_HUMAN Surfeit locus protein 4 OS=Homo sapiens OX=9606 GN=SURF4 PE=1 SV	Surfeit locus protein 4	SURF4	2.18609	2.18607	1.8724	28.5	24.2	387260000	1762300000	43029000	195810000	420030000	1537900000	9	26	5	5	5	5	4	4	4	4	4	4	32.8	32.8	32.8	21.127	186	186;159;269;226;128	323.31				997	5320;10777;11135;12509;13884	True;True;True;True;True	5538;5539;11363;11743;13187;14646;14647;14648	16027;16028;16029;16030;16031;16032;16033;16034;16035;16036;16037;16038;16039;16040;16041;16042;16043;16044;33162;33163;33164;34370;38593;38594;38595;42945;42946;42947;42948;42949;42950;42951;42952;42953	17148;17149;17150;17151;17152;17153;17154;17155;17156;17157;17158;17159;17160;17161;17162;17163;17164;17165;17166;35743;35744;35745;37037;41532;41533;41534;46139;46140;46141;46142;46143;46144;46145;46146;46147	17165;35744;37037;41534;46145		326;327;328		7;141;148	Q5T8U5;O15260-2;O15260;B7Z1G8;O15260-3	Q5T8U5;O15260-2;O15260;B7Z1G8;O15260-3
sp|Q9Y4E5-2|ZN451_HUMAN Isoform 2 of E3 SUMO-protein ligase ZNF451 OS=Homo sapiens OX=9606 GN=ZNF451;sp|Q9Y4E5|ZN451_HUMAN E3 SUMO-protein ligase ZNF451 OS=Homo sapiens OX=9606 GN=ZNF451 PE=1 SV=2;tr|E9PH99|E9PH99_HUMAN E3 SUMO-protein ligase ZNF451 OS=Hom	Zinc finger protein 451	ZNF451	-0.217819	-0.217811	-0.781442	20.1	20.3	2031600000	1746900000	37622000	32350000	2642900000	1537600000	50	51	4	27	27	27	20	20	20	20	20	20	24	24	24	115.77	1013	1013;1061;1041;158	135.05				2615	464;465;2029;2451;2526;2786;3040;3066;4246;4383;4480;4942;5865;5985;5986;7129;7210;7224;8352;10818;11566;11567;11997;13043;13458;13566;15866	True;True;True;True;True;True;True;True;True;True;True;True;True;True;True;True;True;True;True;True;True;True;True;True;True;True;True	488;489;2109;2550;2628;2896;3163;3194;4427;4570;4670;5146;6110;6234;6235;7418;7513;7531;8708;11410;12194;12195;12646;13748;14198;14310;16726	1415;1416;1417;1418;1419;5977;5978;5979;5980;7221;7222;7223;7224;7439;8154;8155;8987;8988;8989;9138;9139;9140;9141;9142;9143;9144;9145;12735;12736;12737;13165;13395;13396;13397;13398;13399;14829;14830;14831;14832;14833;17732;17733;18074;18075;18076;18077;18078;18079;18080;18081;18082;18083;18084;18085;18086;18087;18088;21566;21567;21930;21988;25432;25433;25434;25435;33337;33338;33339;33340;33341;…	1496;1497;1498;1499;1500;6378;6379;6380;6381;7689;7690;7691;7692;7911;8702;8703;9604;9605;9606;9762;9763;9764;9765;9766;9767;9768;9769;13575;13576;13577;13578;13579;14045;14282;14283;14284;14285;14286;15845;15846;15847;15848;15849;18939;18940;19289;19290;19291;19292;19293;19294;19295;19296;19297;19298;19299;19300;19301;19302;19303;23172;23173;23565;23630;27481;27482;27483;27484;35939;35940;35941;…	1496;1499;6380;7692;7911;8703;9605;9768;13578;14045;14284;15848;18939;19299;19302;23173;23565;23630;27483;35942;38445;38449;39914;43316;44753;45083;53436					Q9Y4E5-2;Q9Y4E5;E9PH99;D6RIA1	Q9Y4E5-2;Q9Y4E5;E9PH99
sp|Q13423|NNTM_HUMAN NAD(P) transhydrogenase, mitochondrial OS=Homo sapiens OX=9606 GN=NNT PE=1 SV=3;tr|E9PCX7|E9PCX7_HUMAN NAD(P) transhydrogenase, mitochondrial OS=Homo sapiens OX=9606 GN=NNT PE=1 SV=1	NAD(P) transhydrogenase, mitochondrial	NNT	1.0955	1.09544	-0.0858919	26.3	36.1	998000000	2132600000	20792000	44428000	1617700000	1524200000	38	81	6	33	33	33	21	31	21	31	21	31	37.7	37.7	37.7	113.89	1086	1086;955;217;199;57;58	323.31				1667	36;1243;1379;1744;2795;2894;3266;3278;3553;3554;3582;3885;3922;5007;6517;7732;10171;11067;11915;11916;13643;13699;13700;13719;13720;15482;15603;15612;15613;15829;15865;16285;16978	True;True;True;True;True;True;True;True;True;True;True;True;True;True;True;True;True;True;True;True;True;True;True;True;True;True;True;True;True;True;True;True;True	38;1297;1437;1812;2905;3008;3402;3418;3708;3709;3740;4052;4093;5213;6785;8063;8064;10609;11669;12558;12559;14390;14446;14447;14471;14472;14473;14474;16318;16449;16450;16460;16461;16688;16725;17158;17875	99;100;101;102;103;3699;4082;4083;5161;5162;5163;5164;5165;5166;8173;8174;8175;8437;8438;8439;8440;9754;9755;9795;9796;10675;10676;10677;10678;10679;10769;10770;10771;11655;11656;11657;11776;11777;11778;15051;15052;15053;15054;15055;19672;19673;19674;19675;19676;19677;19678;19679;23604;23605;23606;23607;23608;30882;30883;30884;34124;36782;36783;36784;36785;36786;36787;42185;42328;42329;42330;4233…	101;102;103;104;105;4002;4393;4394;5528;5529;5530;5531;5532;5533;8721;8722;8723;9020;9021;9022;9023;10419;10420;10461;10462;11418;11419;11420;11421;11422;11514;11515;11516;12438;12439;12440;12564;12565;12566;16075;16076;16077;16078;16079;21014;21015;21016;21017;21018;21019;21020;21021;25511;25512;25513;25514;25515;33253;33254;33255;36765;39611;39612;39613;39614;39615;39616;45355;45500;45501;45502…	104;4002;4394;5532;8723;9023;10420;10462;11418;11422;11516;12439;12565;16079;21019;25512;33255;36765;39613;39616;45355;45501;45505;45592;45597;51970;52410;52447;52448;53269;53433;54757;57047		656;657		177;1064	Q13423;E9PCX7;D6RAI5;D6RHU2;H0Y8P5;D6RCR6	Q13423;E9PCX7
sp|Q9BSJ8-2|ESYT1_HUMAN Isoform 2 of Extended synaptotagmin-1 OS=Homo sapiens OX=9606 GN=ESYT1;sp|Q9BSJ8|ESYT1_HUMAN Extended synaptotagmin-1 OS=Homo sapiens OX=9606 GN=ESYT1 PE=1 SV=1	Extended synaptotagmin-1	ESYT1	2.11452	2.11453	0.490932	17.8	32.5	476900000	2065200000	9732600	42147000	1079800000	1517500000	32	81	3	34	34	34	16	29	16	29	16	29	34.7	34.7	34.7	124	1114	1114;1104;88	323.31				2308	323;324;1104;2321;3186;3187;3843;3844;3864;3865;4094;5232;5420;5774;6278;6279;7604;8786;9144;9796;9814;9829;12117;13467;13929;15002;15225;15226;15227;16023;16556;16784;17260;17411	True;True;True;True;True;True;True;True;True;True;True;True;True;True;True;True;True;True;True;True;True;True;True;True;True;True;True;True;True;True;True;True;True;True	340;341;1141;2412;3317;3318;4009;4010;4031;4032;4269;5448;5642;6015;6537;6538;7933;9171;9536;10219;10238;10253;12772;14209;14699;15811;16045;16046;16047;16891;17436;17673;18167;18324	1023;1024;1025;3256;3257;3258;6819;6820;9485;9486;9487;9488;11505;11506;11507;11508;11577;11578;11579;11580;11581;11582;11583;11584;12304;15746;15747;15748;16319;16320;17468;17469;17470;18870;18871;18872;18873;18874;18875;18876;18877;18878;18879;18880;23207;23208;23209;26848;26849;26850;26851;26852;26853;27907;27908;27909;27910;27911;27912;29882;29883;29884;29885;29886;29929;29930;29962;29963;299…	1101;1102;1103;3515;3516;3517;7245;7246;10116;10117;10118;10119;12282;12283;12284;12285;12359;12360;12361;12362;12363;12364;12365;12366;12367;13129;16841;16842;16843;17450;17451;18668;18669;18670;20153;20154;20155;20156;20157;20158;20159;20160;20161;20162;20163;20164;25078;25079;25080;28970;28971;28972;28973;28974;28975;30085;30086;30087;30088;30089;30090;32219;32220;32221;32222;32223;32267;32268…	1101;1103;3515;7246;10116;10117;12284;12285;12361;12367;13129;16843;17450;18668;20158;20162;25078;28970;30087;32223;32268;32304;40287;44812;46333;50193;51042;51046;51047;54011;55618;56379;57961;58482					Q9BSJ8-2;Q9BSJ8;F8VZB1	Q9BSJ8-2;Q9BSJ8
tr|K7EMV3|K7EMV3_HUMAN Histone H3 OS=Homo sapiens OX=9606 GN=H3F3B PE=1 SV=1;tr|B4DEB1|B4DEB1_HUMAN Histone H3 OS=Homo sapiens OX=9606 GN=H3F3A PE=1 SV=1;tr|K7EK07|K7EK07_HUMAN Histone H3 (Fragment) OS=Homo sapiens OX=9606 GN=H3F3B PE=1 SV=1;tr|K7ES00|K7ES	Histone H3;Histone H3.2;Histone H3.1t;Histone H3.3;Histone H3.1;Histone H3.3C	H3F3B;H3F3A;HIST2H3A;HIST3H3;HIST1H3A;H3F3C	3.4091	3.40913	0.586872	19.6	29.3	221390000	2351800000	44278000	470370000	1006600000	1511900000	3	12	10	4	4	2	3	4	3	4	2	2	29.3	29.3	12	10.334	92	92;123;132;151;136;136;136;136;113;135	40.972				373	2932;2933;14285;17871	True;True;True;True	3051;3052;3053;15072;18804	8608;8609;8610;8611;8612;8613;8614;8615;8616;8617;8618;8619;8620;8621;8622;44256;44257;44258;44259;55698;55699;55700;55701;55702	9205;9206;9207;9208;9209;9210;9211;9212;9213;9214;9215;9216;9217;9218;9219;9220;9221;9222;47531;47532;47533;47534;47535;47536;47537;59873;59874;59875;59876;59877	9207;9221;47536;59873	55		80		K7EMV3;B4DEB1;K7EK07;K7ES00;Q71DI3;Q16695;P84243;P68431;K7EP01;Q6NXT2	K7EMV3;B4DEB1;K7EK07;K7ES00;Q71DI3;Q16695;P84243;P68431;K7EP01;Q6NXT2
sp|Q9H3N1|TMX1_HUMAN Thioredoxin-related transmembrane protein 1 OS=Homo sapiens OX=9606 GN=TMX1 PE=1 SV=1	Thioredoxin-related transmembrane protein 1	TMX1	1.28951	1.28945	0.172065	20.7	21.8	806520000	1971500000	73320000	179220000	1324700000	1492500000	15	34	2	10	10	10	6	10	6	10	6	10	21.8	21.8	21.8	31.791	280	280;105	70.623				2371	1941;7209;7509;9083;9084;12806;12858;13708;15062;15986	True;True;True;True;True;True;True;True;True;True	2021;7512;7835;9474;9475;13501;13556;14455;15872;16849	5742;5743;5744;5745;5746;5747;5748;5749;5750;5751;21927;21928;21929;22841;22842;27716;27717;27718;27719;27720;27721;27722;27723;27724;27725;39524;39525;39685;42356;42357;42358;42359;42360;42361;46810;46811;46812;46813;50016;50017;50018;50019;50020	6131;6132;6133;6134;6135;6136;6137;6138;6139;6140;6141;23562;23563;23564;24547;24548;29880;29881;29882;29883;29884;29885;29886;29887;29888;29889;42511;42512;42513;42695;45529;45530;45531;45532;45533;45534;45535;45536;45537;45538;50384;50385;50386;50387;53858;53859;53860;53861;53862	6137;23564;24548;29880;29888;42513;42695;45532;50384;53860					Q9H3N1;G3V448	Q9H3N1
sp|P55316|FOXG1_HUMAN Forkhead box protein G1 OS=Homo sapiens OX=9606 GN=FOXG1 PE=1 SV=2	Forkhead box protein G1	FOXG1	-0.398559	-0.398457	-0.604311	32.1	32.3	2150100000	1631100000	134380000	101950000	2240700000	1473900000	39	49	5	14	14	14	9	12	9	12	9	12	35.4	35.4	35.4	52.352	489	489;114;345;501;553	98.384				1491	238;239;240;685;4610;4707;5254;5880;9809;9856;10459;10972;11954;17491	True;True;True;True;True;True;True;True;True;True;True;True;True;True	250;251;252;711;712;4807;4907;5470;6125;6126;10232;10233;10280;10281;10972;11569;12603;18404	742;743;744;745;746;747;748;749;750;751;752;753;754;755;756;757;758;759;760;761;762;763;764;2003;2004;2005;2006;2007;2008;2009;2010;2011;2012;2013;2014;13818;13819;13820;13821;13822;13823;13824;13825;13826;13827;13828;13829;13830;14119;14120;15826;15827;17777;17778;17779;17780;17781;17782;17783;17784;17785;17786;17787;29918;29919;30046;30047;30048;30049;32000;33811;36927;36928;54589	795;796;797;798;799;800;801;802;803;804;805;806;807;808;809;810;811;812;813;814;815;816;817;818;819;820;821;822;2102;2103;2104;2105;2106;2107;2108;2109;2110;2111;2112;2113;2114;14742;14743;14744;14745;14746;14747;14748;14749;14750;14751;14752;14753;14754;14755;14756;14757;14758;14759;14760;14761;14762;15073;15074;16928;16929;18987;18988;18989;18990;18991;18992;18993;18994;18995;18996;18997;32256;…	797;812;817;2113;14750;15074;16929;18996;32257;32392;34480;36437;39779;58713		573;574;575;576		212;256;300;310	P55316;M0R279;Q12952;Q99958;Q12948	P55316
sp|Q9P0I2|EMC3_HUMAN ER membrane protein complex subunit 3 OS=Homo sapiens OX=9606 GN=EMC3 PE=1 SV=3;sp|Q9P0I2-2|EMC3_HUMAN Isoform 2 of ER membrane protein complex subunit 3 OS=Homo sapiens OX=9606 GN=EMC3	ER membrane protein complex subunit 3	EMC3	1.7622	1.76213	0.81255	39.1	46.7	525980000	1784200000	40460000	137240000	837550000	1471000000	16	53	4	12	12	12	7	12	7	12	7	12	46.7	46.7	46.7	29.952	261	261;219;203;78	323.31				2487	484;2177;2178;7546;7780;7809;9834;10539;13576;14732;17109;17999	True;True;True;True;True;True;True;True;True;True;True;True	508;509;2260;2261;2262;7873;8114;8144;10258;11072;11073;14320;15537;15538;18010;18935	1468;1469;1470;1471;1472;1473;6395;6396;6397;6398;6399;6400;6401;6402;6403;6404;6405;6406;6407;6408;23027;23028;23029;23030;23786;23787;23788;23890;23891;23892;23893;23894;23895;23896;29976;29977;29978;29979;29980;29981;29982;29983;29984;32287;32288;32289;32290;32291;32292;32293;32294;41955;41956;41957;41958;41959;45876;45877;45878;45879;53390;53391;53392;53393;56053;56054;56055;56056;56057	1550;1551;1552;1553;1554;1555;6811;6812;6813;6814;6815;6816;6817;6818;6819;6820;6821;6822;6823;6824;24883;24884;24885;24886;25706;25707;25708;25816;25817;25818;25819;25820;25821;25822;32319;32320;32321;32322;32323;32324;32325;32326;32327;34787;34788;34789;34790;34791;34792;34793;34794;45110;45111;45112;45113;45114;49375;49376;49377;49378;57443;57444;57445;57446;60235;60236;60237;60238;60239	1550;6815;6823;24884;25706;25819;32322;34790;45114;49376;57446;60238		908;909;910;911;912		198;199;203;242;251	Q9P0I2;Q9P0I2-2;C9JLM9;S4R3U9	Q9P0I2;Q9P0I2-2
sp|P11279|LAMP1_HUMAN Lysosome-associated membrane glycoprotein 1 OS=Homo sapiens OX=9606 GN=LAMP1 PE=1 SV=3;sp|P11279-2|LAMP1_HUMAN Isoform 2 of Lysosome-associated membrane glycoprotein 1 OS=Homo sapiens OX=9606 GN=LAMP1	Lysosome-associated membrane glycoprotein 1	LAMP1	0.544059	0.54408	0.00196365	12	11.3	1135200000	1655200000	59748000	87118000	1468400000	1470400000	14	18	2	6	6	6	5	5	5	5	5	5	12	12	12	44.882	417	417;364	103.57				1225	1079;2969;3866;3867;15631;15632	True;True;True;True;True;True	1116;3091;4033;4034;16479;16480	3193;3194;3195;3196;3197;3198;8762;11585;11586;11587;11588;11589;11590;11591;11592;11593;11594;11595;48790;48791;48792;48793;48794;48795;48796;48797;48798;48799;48800;48801;48802;48803	3451;3452;3453;3454;3455;3456;9364;12368;12369;12370;12371;12372;12373;12374;12375;12376;12377;12378;52510;52511;52512;52513;52514;52515;52516;52517;52518;52519;52520;52521;52522;52523	3451;9364;12371;12378;52510;52517					P11279;P11279-2	P11279;P11279-2
sp|P43121|MUC18_HUMAN Cell surface glycoprotein MUC18 OS=Homo sapiens OX=9606 GN=MCAM PE=1 SV=2	Cell surface glycoprotein MUC18	MCAM	-0.672434	-0.672466	-0.616958	28.5	23.7	2160500000	1355600000	63543000	39869000	2245400000	1464100000	47	40	2	19	19	19	17	13	17	13	17	13	31	31	31	71.607	646	646;527	126.29				1399	2600;2601;2774;3632;4631;5294;7681;10993;11471;11939;13059;13060;13061;15426;16230;16833;16911;17155;17156	True;True;True;True;True;True;True;True;True;True;True;True;True;True;True;True;True;True;True	2705;2706;2883;3791;4828;5512;8012;11590;12096;12584;13765;13766;13767;16261;17102;17724;17808;18059;18060;18061	7648;7649;7650;7651;7652;7653;7654;7655;8112;8113;8114;8115;8116;8117;10911;10912;10913;10914;10915;10916;13877;13878;13879;13880;13881;15956;15957;15958;15959;15960;23437;23438;23439;23440;23441;33861;33862;33863;35450;35451;35452;36860;36861;36862;40309;40310;40311;40312;40313;40314;40315;40316;40317;40318;40319;40320;40321;40322;40323;40324;40325;48098;50711;50712;50713;50714;50715;52533;52534…	8156;8157;8158;8159;8160;8161;8162;8163;8657;8658;8659;8660;8661;8662;11658;11659;11660;11661;11662;11663;11664;14815;14816;14817;14818;14819;17077;17078;17079;17080;17081;25316;25317;25318;25319;25320;36487;36488;36489;36490;38181;38182;38183;39702;39703;39704;43352;43353;43354;43355;43356;43357;43358;43359;43360;43361;43362;43363;43364;43365;43366;43367;43368;51768;54581;54582;54583;54584;54585…	8157;8161;8657;11659;14817;17077;25318;36488;38181;39704;43353;43360;43368;51768;54581;56519;56782;57616;57622		517;518		261;433	P43121;P43121-2	P43121
tr|J3QK89|J3QK89_HUMAN Calcium homeostasis endoplasmic reticulum protein OS=Homo sapiens OX=9606 GN=CHERP PE=1 SV=1;sp|Q8IWX8|CHERP_HUMAN Calcium homeostasis endoplasmic reticulum protein OS=Homo sapiens OX=9606 GN=CHERP PE=1 SV=3	Calcium homeostasis endoplasmic reticulum protein	CHERP	-0.162858	-0.162887	-0.67375	22.7	26.9	1863300000	1664400000	54803000	48952000	2253400000	1412600000	49	71	2	25	25	25	19	20	19	20	19	20	28.9	28.9	28.9	104.93	927	927;916	161				884	1865;2135;3155;3336;3337;5540;5541;6938;8093;8094;8355;8770;9055;9330;10373;11123;11460;11481;11597;11647;11864;11938;12834;14521;15413	True;True;True;True;True;True;True;True;True;True;True;True;True;True;True;True;True;True;True;True;True;True;True;True;True	1941;2218;3285;3482;3483;5767;5768;7223;8443;8444;8711;9155;9444;9740;10867;11729;12085;12106;12227;12279;12506;12583;13530;13531;15315;16248	5508;5509;5510;5511;5512;5513;6299;9399;9400;10003;10004;10005;10006;10007;10008;10009;10010;10011;10012;10013;16652;16653;16654;16655;21004;21005;21006;21007;21008;21009;21010;21011;24720;24721;24722;24723;24724;25440;25441;25442;25443;25444;26784;26785;26786;26787;26788;26789;26790;26791;26792;26793;26794;27607;27608;28511;28512;31693;31694;31695;34329;34330;35407;35408;35475;35476;35477;35478;…	5893;5894;5895;5896;5897;5898;6715;10027;10028;10677;10678;10679;10680;10681;10682;10683;10684;10685;10686;10687;17803;17804;17805;17806;17807;22581;22582;22583;22584;22585;22586;22587;22588;26682;26683;26684;26685;26686;27489;27490;27491;27492;27493;28899;28900;28901;28902;28903;28904;28905;28906;28907;28908;28909;28910;28911;28912;28913;28914;29765;29766;30757;30758;34157;34158;34159;36987;3698…	5894;6715;10027;10682;10686;17803;17804;22581;26682;26686;27491;28909;29766;30757;34157;36988;38130;38211;38549;38790;39441;39697;42587;48705;51715		292		666	J3QK89;Q8IWX8	J3QK89;Q8IWX8
sp|Q96C00|ZBTB9_HUMAN Zinc finger and BTB domain-containing protein 9 OS=Homo sapiens OX=9606 GN=ZBTB9 PE=1 SV=1;tr|A0A087X1K1|A0A087X1K1_HUMAN Zinc finger and BTB domain-containing protein 9 (Fragment) OS=Homo sapiens OX=9606 GN=ZBTB9 PE=1 SV=1	Zinc finger and BTB domain-containing protein 9	ZBTB9	5.2185	5.21854	#NUM!	4	20.7	39178000	1458700000	1703400	63424000	0	1397300000	3	36	3	8	8	8	1	8	1	8	1	8	20.7	20.7	20.7	50.602	473	473;138;79	81.549				2203	1666;1667;2767;3106;7519;8969;11856;14990	True;True;True;True;True;True;True;True	1732;1733;2876;3235;7846;9357;12498;15799	4922;4923;4924;4925;4926;4927;4928;4929;8098;8099;9245;9246;22866;22867;22868;22869;22870;22871;27327;27328;27329;36602;46598;46599;46600;46601;46602;46603;46604;46605;46606	5278;5279;5280;5281;5282;5283;5284;5285;5286;8643;8644;9871;9872;24572;24573;24574;24575;24576;24577;24578;24579;24580;24581;24582;24583;29465;29466;29467;29468;39418;50152;50153;50154;50155;50156;50157;50158;50159;50160	5281;5286;8644;9872;24572;29467;39418;50157					Q96C00;A0A087X1K1;A0A087X1Z5	Q96C00;A0A087X1K1
sp|Q9H040|SPRTN_HUMAN SprT-like domain-containing protein Spartan OS=Homo sapiens OX=9606 GN=SPRTN PE=1 SV=2	SprT-like domain-containing protein Spartan	SPRTN	7.5893	7.58929	#NUM!	2	44.6	7618700	1467200000	262710	50592000	0	1387800000	1	59	4	19	19	19	1	19	1	19	1	19	44.6	44.6	44.6	55.133	489	489;187;250;207	94.796				2354	857;1579;2124;5636;6672;6933;8096;8097;8408;8409;8656;9398;9631;10183;11488;15406;15407;15639;16963	True;True;True;True;True;True;True;True;True;True;True;True;True;True;True;True;True;True;True	888;1642;2207;5868;6950;7218;8446;8447;8767;8768;9034;9812;10050;10623;10624;12113;16241;16242;16487;17860	2567;4656;6270;6271;6272;16961;16962;16963;20193;20194;20994;20995;24726;24727;24728;24729;24730;24731;25612;25613;25614;25615;25616;25617;25618;25619;25620;25621;25622;26383;28701;28702;28703;29398;29399;29400;30940;30941;30942;30943;35488;35489;35490;35491;35492;35493;48012;48013;48014;48015;48016;48017;48018;48019;48020;48820;48821;52945;52946	2796;4997;6686;6687;6688;18128;18129;18130;21571;21572;22571;22572;26688;26689;26690;26691;26692;26693;27673;27674;27675;27676;27677;27678;27679;27680;27681;27682;27683;28468;30970;30971;30972;31688;31689;31690;33319;33320;33321;33322;38220;38221;38222;38223;38224;38225;38226;51676;51677;51678;51679;51680;51681;51682;51683;51684;52540;52541;56953;56954	2796;4997;6686;18130;21571;22571;26689;26690;27676;27678;28468;30970;31688;33321;38223;51678;51682;52541;56954		867		1	Q9H040;B1AKT1;Q9H040-2;Q9H040-3	Q9H040
sp|O60763|USO1_HUMAN General vesicular transport factor p115 OS=Homo sapiens OX=9606 GN=USO1 PE=1 SV=2;sp|O60763-2|USO1_HUMAN Isoform 2 of General vesicular transport factor p115 OS=Homo sapiens OX=9606 GN=USO1	General vesicular transport factor p115	USO1	1.92218	1.92217	0.590194	23.9	37.4	487790000	1848700000	11344000	42993000	916670000	1380000000	31	73	9	29	29	29	18	27	18	27	18	27	39.1	39.1	39.1	107.89	962	962;973;54;61;84;104;146;354;354	221.64				1049	1490;2402;3151;3326;3327;3579;5550;6187;6762;7017;8207;8377;9174;9505;9538;9595;9940;10440;10873;11310;11352;11411;12353;14056;14236;14374;15126;15894;16996	True;True;True;True;True;True;True;True;True;True;True;True;True;True;True;True;True;True;True;True;True;True;True;True;True;True;True;True;True	1553;2498;3281;3472;3473;3737;5777;5778;6445;7042;7303;8560;8735;9568;9922;9956;10014;10366;10948;11469;11927;11973;12033;13027;14833;15021;15163;15943;16754;17895	4434;4435;4436;4437;4438;4439;7077;7078;7079;7080;7081;7082;7083;7084;9386;9975;9976;9977;9978;9979;9980;9981;9982;9983;10759;10760;10761;10762;10763;10764;16677;16678;16679;16680;16681;18648;18649;18650;18651;20501;21240;21241;21242;21243;21244;21245;25009;25519;28011;28012;29006;29007;29008;29009;29104;29105;29106;29107;29108;29109;29284;29285;29286;29287;29288;30273;30274;30275;30276;31926;319…	4760;4761;4762;4763;4764;4765;7534;7535;7536;7537;7538;7539;7540;7541;10014;10646;10647;10648;10649;10650;10651;10652;10653;10654;11503;11504;11505;11506;11507;11508;11509;17829;17830;17831;17832;17833;19918;19919;19920;19921;22049;22817;22818;22819;22820;22821;22822;26979;27575;30191;30192;31280;31281;31282;31283;31379;31380;31381;31382;31383;31384;31570;31571;31572;31573;31574;32624;32625;32626…	4764;7541;10014;10649;10654;11509;17831;19918;22049;22821;26979;27575;30191;31282;31379;31574;32627;34406;36120;37593;37768;37936;41054;46737;47331;47849;50719;53548;57107		350		8	O60763;O60763-2;REV__A0A1W2PRE1;REV__A0A1W2PQK2;REV__A0A087WTB6;REV__A0A1W2PRJ7;REV__A0A1W2PS82;REV__P09471-2;REV__P09471	O60763;O60763-2
sp|Q12907|LMAN2_HUMAN Vesicular integral-membrane protein VIP36 OS=Homo sapiens OX=9606 GN=LMAN2 PE=1 SV=1;tr|D6RBV2|D6RBV2_HUMAN Vesicular integral-membrane protein VIP36 OS=Homo sapiens OX=9606 GN=LMAN2 PE=1 SV=1;tr|D6RIU4|D6RIU4_HUMAN Vesicular integral	Vesicular integral-membrane protein VIP36	LMAN2	0.615717	0.615653	-0.128847	40.4	48.9	1177300000	1804000000	65407000	100220000	1508700000	1379800000	24	48	5	15	15	15	9	14	9	14	9	14	49.2	49.2	49.2	40.228	356	356;325;191;288;203	213.75				1641	2291;2309;2379;2926;5356;6062;7577;8293;8294;9349;9872;9968;11190;11450;13965	True;True;True;True;True;True;True;True;True;True;True;True;True;True;True	2382;2400;2475;3043;3044;3045;5576;6314;7904;8646;8647;8648;9760;9761;10298;10394;11801;12075;14735	6729;6730;6731;6732;6733;6734;6735;6787;6788;6789;6790;7005;7006;7007;8587;8588;8589;8590;8591;8592;8593;8594;16134;16135;16136;16137;16138;18303;18304;23101;25239;25240;25241;25242;25243;25244;25245;25246;25247;25248;25249;25250;25251;28550;28551;28552;28553;28554;30101;30102;30103;30363;34545;34546;34547;34548;34549;34550;34551;34552;34553;34554;35373;35374;35375;35376;35377;43236;43237;43238;4…	7154;7155;7156;7157;7158;7159;7160;7213;7214;7215;7216;7454;7455;7456;9183;9184;9185;9186;9187;9188;9189;9190;9191;17259;17260;17261;17262;17263;19544;19545;24960;27220;27221;27222;27223;27224;27225;27226;27227;27228;27229;27230;27231;27232;30813;30814;30815;30816;30817;32451;32452;32453;32716;37222;37223;37224;37225;37226;37227;37228;37229;37230;37231;38096;38097;38098;38099;38100;46449;46450;46…	7160;7214;7456;9184;17260;19545;24960;27221;27232;30817;32453;32716;37231;38100;46452		645;646;647;648		72;82;271;277	Q12907;D6RBV2;D6RIU4;D6RDX1;D6RBH1	Q12907;D6RBV2;D6RIU4;D6RDX1
sp|P68036|UB2L3_HUMAN Ubiquitin-conjugating enzyme E2 L3 OS=Homo sapiens OX=9606 GN=UBE2L3 PE=1 SV=1;sp|P68036-3|UB2L3_HUMAN Isoform 3 of Ubiquitin-conjugating enzyme E2 L3 OS=Homo sapiens OX=9606 GN=UBE2L3;sp|P68036-2|UB2L3_HUMAN Isoform 2 of Ubiquitin-co	Ubiquitin-conjugating enzyme E2 L3	UBE2L3	#NUM!	#NUM!	#NUM!	0	64.3	0	1384500000	0	197790000	0	1367600000	0	49	4	12	12	12	0	12	0	12	0	12	64.3	64.3	64.3	17.861	154	154;212;122;154	89.981				1559	256;257;6050;7111;9188;11070;11071;12720;14675;14676;14677;15060	True;True;True;True;True;True;True;True;True;True;True;True	269;270;6301;6302;7399;9583;11672;11673;13409;15478;15479;15480;15870	823;824;825;826;827;828;829;830;18272;18273;18274;18275;18276;21502;21503;21504;21505;21506;28051;34127;34128;34129;34130;34131;39210;45687;45688;45689;45690;45691;45692;45693;45694;45695;45696;45697;45698;45699;45700;45701;45702;45703;45704;45705;45706;45707;45708;45709;46808	891;892;893;894;895;896;897;898;19507;19508;19509;19510;19511;19512;19513;19514;23107;23108;23109;23110;23111;30231;36768;36769;36770;36771;36772;36773;36774;42181;49174;49175;49176;49177;49178;49179;49180;49181;49182;49183;49184;49185;49186;49187;49188;49189;49190;49191;49192;49193;49194;49195;49196;49197;49198;49199;50382	891;895;19510;23110;30231;36771;36774;42181;49176;49182;49190;50382	196		64		P68036;P68036-3;P68036-2;A0A1B0GUS4	P68036;P68036-3;P68036-2
sp|O94888|UBXN7_HUMAN UBX domain-containing protein 7 OS=Homo sapiens OX=9606 GN=UBXN7 PE=1 SV=2	UBX domain-containing protein 7	UBXN7	#NUM!	#NUM!	#NUM!	0	40.9	0	1405600000	0	61113000	0	1341900000	0	62	5	19	19	19	0	19	0	19	0	19	40.9	40.9	40.9	54.862	489	489;327;76;75;125	129.53				1096	90;1234;1469;1960;1961;2539;2912;3349;3830;5125;5624;7241;8348;9861;11846;13198;13490;13491;13492	True;True;True;True;True;True;True;True;True;True;True;True;True;True;True;True;True;True;True	92;1288;1530;2040;2041;2641;3029;3495;3995;5334;5855;7548;8704;10286;10287;12488;13919;14232;14233;14234	247;248;249;3677;3678;4354;5788;5789;5790;5791;7463;7464;8537;8538;10040;10041;11459;11460;15429;15430;15431;15432;15433;15434;16920;16921;16922;22028;25423;25424;25425;30062;30063;30064;30065;30066;30067;30068;30069;36577;36578;40815;40816;41733;41734;41735;41736;41737;41738;41739;41740	254;255;256;3980;3981;4677;6179;6180;6181;6182;7937;7938;9132;9133;10714;10715;10716;10717;12234;12235;16495;16496;16497;16498;16499;16500;18083;18084;18085;18086;18087;23678;27470;27471;27472;27473;27474;32406;32407;32408;32409;32410;32411;32412;32413;32414;32415;32416;32417;32418;39393;39394;43872;43873;44877;44878;44879;44880;44881;44882;44883;44884	254;3981;4677;6179;6182;7937;9133;10715;12234;16495;18083;23678;27471;32409;39394;43872;44877;44879;44884		366		149	O94888;C9JAT7;C9JD50;F8WB69;H7BYF4	O94888
sp|P12814-3|ACTN1_HUMAN Isoform 3 of Alpha-actinin-1 OS=Homo sapiens OX=9606 GN=ACTN1;sp|P12814|ACTN1_HUMAN Alpha-actinin-1 OS=Homo sapiens OX=9606 GN=ACTN1 PE=1 SV=2;sp|P12814-2|ACTN1_HUMAN Isoform 2 of Alpha-actinin-1 OS=Homo sapiens OX=9606 GN=ACTN1;sp|	Alpha-actinin-1	ACTN1	4.18521	4.18513	3.56988	5.4	44.6	77596000	1411600000	1437000	26140000	111720000	1326700000	7	72	19	28	28	21	3	27	3	27	2	20	44.6	44.6	35.3	105.57	914	914;892;887;930;822;297;260;238;251;207;144;126;894;894;85;944;901;686;72	213.56				1235	786;909;1452;1572;3732;5603;5824;6018;6435;6436;6870;7176;7350;7631;7896;7956;8898;8899;9558;9679;9992;10200;10450;12022;13572;14978;16215;16412	True;True;True;True;True;True;True;True;True;True;True;True;True;True;True;True;True;True;True;True;True;True;True;True;True;True;True;True	814;942;1513;1635;3895;5832;6068;6268;6703;6704;7154;7472;7666;7961;8231;8296;9286;9287;9976;10098;10421;10645;10961;12671;14316;15787;17086;17289	2282;2283;2284;2285;2707;2708;4299;4300;4634;4635;11179;11180;16836;16837;16838;17626;18182;18183;18184;18185;19440;19441;19442;19443;19444;19445;19446;20793;20794;20795;20796;20797;21798;21799;21800;21801;21802;22352;23286;23287;24148;24316;24317;24318;27143;27144;27145;27146;27147;27148;29159;29160;29524;29525;30419;31014;31015;31968;31969;31970;31971;31972;31973;31974;37120;37121;37122;41945;4…	2392;2393;2394;2395;2939;2940;4618;4619;4969;4970;11932;11933;17992;17993;17994;18827;19408;19409;19410;19411;20766;20767;20768;20769;20770;20771;20772;22350;22351;22352;22353;22354;23423;23424;23425;23426;23427;24016;25163;25164;26091;26263;26264;26265;29273;29274;29275;29276;29277;29278;29279;31434;31435;31827;31828;32773;33393;33394;34448;34449;34450;34451;34452;34453;34454;39985;39986;39987;4…	2394;2939;4619;4970;11933;17993;18827;19411;20766;20772;22350;23426;24016;25164;26091;26265;29274;29279;31434;31827;32773;33393;34451;39986;45100;50126;54529;55169					P12814-3;P12814;P12814-2;P12814-4;H9KV75;H7C5W8;G3V2N5;G3V2W4;H0YJW3;H0YJ11;G3V2X9;G3V5M4;P35609;P35609-2;G3V2E8;A0A087WSZ2;Q08043;F6THM6;G3V380	P12814-3;P12814;P12814-2;P12814-4;H9KV75
sp|Q92621|NU205_HUMAN Nuclear pore complex protein Nup205 OS=Homo sapiens OX=9606 GN=NUP205 PE=1 SV=3	Nuclear pore complex protein Nup205	NUP205	2.08569	2.08567	1.30101	9.7	16.4	364800000	1548500000	3722500	15801000	538430000	1326700000	22	69	3	31	31	31	13	30	13	30	13	30	16.9	16.9	16.9	227.92	2012	2012;273;184	305.83				2158	279;1504;1580;1581;2225;3622;4253;4393;5059;6775;7161;8825;8938;9317;9386;9751;9917;10447;11827;12352;12723;13390;13391;14138;15061;15511;15739;16186;16610;17764;17891	True;True;True;True;True;True;True;True;True;True;True;True;True;True;True;True;True;True;True;True;True;True;True;True;True;True;True;True;True;True;True	294;1567;1643;1644;2310;3781;4436;4581;5267;7055;7451;9210;9326;9726;9799;10172;10343;10957;12469;13026;13412;14128;14129;14919;15871;16348;16595;17056;17490;18687;18826	896;897;4466;4467;4468;4469;4470;4657;4658;4659;4660;4661;6536;6537;6538;10872;12777;12778;12779;12780;12781;13189;13190;13191;13192;13193;15239;15240;20543;20544;20545;20546;21651;21652;26932;26933;26934;27243;27244;28435;28436;28670;28671;29756;29757;29758;30218;30219;30220;30221;30222;30223;31955;31956;36520;36521;36522;38134;38135;38136;38137;38138;39219;41404;41405;41406;41407;41408;41409;43…	964;965;4792;4793;4794;4795;4796;4998;4999;5000;5001;5002;6952;6953;6954;11618;13625;13626;13627;13628;13629;14070;14071;14072;14073;14074;16300;16301;22091;22092;22093;22094;23260;23261;29054;29055;29056;29377;29378;30629;30630;30938;30939;32089;32090;32091;32569;32570;32571;32572;32573;32574;34435;34436;39333;39334;39335;41049;41050;41051;41052;41053;42192;44507;44508;44509;44510;44511;44512;44…	964;4795;4998;5000;6954;11618;13629;14074;16300;22093;23260;29056;29378;30630;30938;32091;32572;34436;39335;41052;42192;44507;44508;47028;50383;52061;52995;54453;55787;59536;59940					Q92621;U3KPX2;U3KQ97	Q92621
tr|B3KVL5|B3KVL5_HUMAN Zinc finger CCHC domain-containing protein 10 OS=Homo sapiens OX=9606 GN=ZCCHC10 PE=1 SV=1;sp|Q8TBK6|ZCH10_HUMAN Zinc finger CCHC domain-containing protein 10 OS=Homo sapiens OX=9606 GN=ZCCHC10 PE=1 SV=1;tr|D6RIV3|D6RIV3_HUMAN Zinc f	Zinc finger CCHC domain-containing protein 10	ZCCHC10	5.73241	5.73238	#NUM!	7.5	14.5	25560000	1358900000	5112100	271780000	0	1323800000	3	14	5	4	4	4	1	4	1	4	1	4	14.5	14.5	14.5	20.308	186	186;192;72;114;170	75.258				371	8987;8988;11762;12824	True;True;True;True	9375;9376;12402;13520	27398;27399;27400;27401;27402;27403;27404;27405;27406;27407;27408;27409;27410;36373;36374;39570;39571	29545;29546;29547;29548;29549;29550;29551;29552;29553;29554;29555;29556;29557;39178;39179;42560;42561	29548;29557;39178;42561					B3KVL5;Q8TBK6;D6RIV3;D6R9G7;Q8TBK6-2	B3KVL5;Q8TBK6;D6RIV3;D6R9G7;Q8TBK6-2
sp|O95782-2|AP2A1_HUMAN Isoform B of AP-2 complex subunit alpha-1 OS=Homo sapiens OX=9606 GN=AP2A1;sp|O95782|AP2A1_HUMAN AP-2 complex subunit alpha-1 OS=Homo sapiens OX=9606 GN=AP2A1 PE=1 SV=3	AP-2 complex subunit alpha-1	AP2A1	2.04943	2.04939	0.951046	18.8	27	387010000	1602000000	7302200	30226000	677090000	1309000000	25	59	4	25	25	20	13	22	13	22	11	18	31.2	31.2	25.4	105.36	955	955;977;57;138	169.23				1125	858;1039;1481;1567;1956;3874;3986;5070;6589;6652;8172;10790;10808;10824;11340;12177;14226;14900;14901;15532;15533;16165;17300;17564;17565	True;True;True;True;True;True;True;True;True;True;True;True;True;True;True;True;True;True;True;True;True;True;True;True;True	889;1075;1544;1630;2036;4041;4159;5279;6860;6861;6930;8524;11377;11399;11416;11961;12833;15011;15709;15710;16371;16372;17034;18209;18481;18482	2568;3078;3079;4404;4405;4624;5778;5779;5780;5781;5782;11616;11617;11618;11619;11620;11621;11622;11623;11624;11979;11980;15267;15268;15269;19902;19903;19904;19905;19906;19907;20134;20135;20136;24910;24911;24912;33224;33225;33226;33227;33228;33298;33350;35025;35026;35027;35028;37567;37568;44053;44054;46326;46327;46328;46329;46330;46331;46332;46333;48437;48438;48439;48440;48441;48442;48443;48444;48…	2797;3322;3323;4730;4731;4959;6168;6169;6170;6171;6172;6173;12399;12400;12401;12402;12403;12404;12405;12406;12407;12785;12786;16328;16329;16330;21250;21251;21252;21253;21254;21255;21509;21510;21511;26878;26879;26880;26881;35811;35812;35813;35814;35815;35889;35952;37727;37728;37729;37730;40445;40446;47301;47302;49844;49845;49846;49847;49848;49849;49850;49851;52123;52124;52125;52126;52127;52128;521…	2797;3323;4730;4959;6170;12407;12786;16329;21251;21511;26880;35813;35889;35952;37727;40446;47302;49845;49851;52127;52131;54404;58080;58936;58937		383		161	O95782-2;O95782;M0R2D9;E9PPY8	O95782-2;O95782
sp|P05026|AT1B1_HUMAN Sodium/potassium-transporting ATPase subunit beta-1 OS=Homo sapiens OX=9606 GN=ATP1B1 PE=1 SV=1;sp|P05026-2|AT1B1_HUMAN Isoform 2 of Sodium/potassium-transporting ATPase subunit beta-1 OS=Homo sapiens OX=9606 GN=ATP1B1	Sodium/potassium-transporting ATPase subunit beta-1	ATP1B1	0.171007	0.171093	-0.877919	32.3	28.1	1629800000	1834900000	135810000	152910000	2379300000	1294700000	27	32	3	12	12	12	11	8	11	8	11	8	32.3	32.3	32.3	35.061	303	303;301;130	84.194				1162	1788;1789;1790;1916;4009;4010;12546;14482;14709;14710;15879;16189	True;True;True;True;True;True;True;True;True;True;True;True	1860;1861;1862;1994;4182;4183;13227;15273;15512;15513;16739;17059	5281;5282;5283;5284;5285;5286;5287;5288;5289;5290;5291;5292;5293;5653;5654;5655;5656;12035;12036;38718;38719;38720;38721;38722;38723;38724;38725;44873;44874;44875;44876;44877;44878;45784;45785;45786;45787;45788;45789;45790;45791;45792;45793;45794;49663;49664;49665;49666;49667;49668;49669;49670;50590;50591;50592;50593	5651;5652;5653;5654;5655;5656;5657;5658;5659;5660;5661;5662;5663;6040;6041;6042;6043;6044;12841;12842;41664;41665;41666;41667;41668;41669;41670;41671;48191;48192;48193;48194;48195;48196;49276;49277;49278;49279;49280;49281;49282;49283;49284;49285;49286;53480;53481;53482;53483;53484;53485;53486;53487;53488;53489;54456;54457;54458;54459	5651;5652;5660;6042;12841;12842;41664;48196;49283;49286;53488;54459					P05026;P05026-2;V9GYR2	P05026;P05026-2
sp|P37268|FDFT_HUMAN Squalene synthase OS=Homo sapiens OX=9606 GN=FDFT1 PE=1 SV=1;tr|E9PNM1|E9PNM1_HUMAN Squalene synthase OS=Homo sapiens OX=9606 GN=FDFT1 PE=1 SV=1;tr|A0A1W2PQ47|A0A1W2PQ47_HUMAN Squalene synthase OS=Homo sapiens OX=9606 GN=FDFT1 PE=1 SV=	Squalene synthase	FDFT1	4.20343	4.20338	1.93947	21.8	39.8	87722000	1616100000	3987400	73457000	336710000	1291500000	9	51	9	16	16	16	7	16	7	16	7	16	39.8	39.8	39.8	48.115	417	417;410;476;374;353;332;306;150;113	276.09				1373	774;775;921;1203;2558;2823;5299;7335;7766;8299;8300;10211;12445;13237;15309;15310	True;True;True;True;True;True;True;True;True;True;True;True;True;True;True;True	802;803;954;1256;2660;2934;5517;7646;7647;7648;8100;8653;8654;10659;13123;13968;13969;16139;16140	2250;2251;2252;2253;2254;2255;2741;2742;2743;3576;3577;3578;7527;8247;15969;15970;15971;22293;22294;22295;22296;22297;22298;23737;25263;25264;25265;25266;25267;25268;25269;25270;31048;31049;31050;31051;38407;38408;38409;40983;40984;40985;40986;40987;40988;40989;40990;40991;40992;40993;47712;47713;47714;47715;47716;47717;47718;47719;47720;47721	2360;2361;2362;2363;2364;2365;2973;2974;2975;3852;3853;3854;8015;8795;17090;17091;17092;23954;23955;23956;23957;23958;23959;25647;27244;27245;27246;27247;27248;27249;27250;27251;33427;33428;33429;33430;41334;41335;41336;44057;44058;44059;44060;44061;44062;44063;44064;44065;44066;44067;51355;51356;51357;51358;51359;51360;51361;51362;51363;51364	2360;2365;2973;3853;8015;8795;17091;23955;25647;27246;27250;33428;41336;44064;51360;51363		508;509;510;511		65;325;326;331	P37268;E9PNM1;A0A1W2PQ47;P37268-5;P37268-2;P37268-3;P37268-4;E9PJG4;E9PS69	P37268;E9PNM1;A0A1W2PQ47;P37268-5;P37268-2;P37268-3;P37268-4
sp|P46087|NOP2_HUMAN Probable 28S rRNA (cytosine(4447)-C(5))-methyltransferase OS=Homo sapiens OX=9606 GN=NOP2 PE=1 SV=2;sp|P46087-4|NOP2_HUMAN Isoform 4 of Probable 28S rRNA (cytosine(4447)-C(5))-methyltransferase OS=Homo sapiens OX=9606 GN=NOP2;sp|P46087	Probable 28S rRNA (cytosine(4447)-C(5))-methyltransferase	NOP2	6.59132	6.59137	5.62224	3.4	24.6	13982000	1348200000	436930	42132000	25950000	1278200000	3	47	10	16	16	16	2	16	2	16	2	16	24.6	24.6	24.6	89.301	812	812;845;808;628;159;176;250;275;81;98	156.38				1411	2143;2147;3167;4134;4135;4564;4995;5554;6731;8479;9973;11552;12239;12308;15311;15402	True;True;True;True;True;True;True;True;True;True;True;True;True;True;True;True	2226;2230;3298;4310;4311;4756;5201;5783;7009;8841;10399;12180;12901;12977;16141;16237	6315;6325;6326;6327;9437;9438;9439;9440;12435;12436;12437;12438;12439;12440;12441;13644;13645;13646;15012;15013;15014;16699;16700;16701;20346;20347;20348;25798;25799;25800;25801;25802;25803;30370;30371;30372;35667;35668;35669;35670;35671;37762;37987;37988;47722;48002;48003;48004	6731;6741;6742;6743;10065;10066;10067;10068;10069;13265;13266;13267;13268;13269;13270;13271;14544;14545;14546;16035;16036;16037;17851;17852;17853;21736;21737;21738;27865;27866;27867;27868;27869;27870;32723;32724;32725;32726;38409;38410;38411;38412;38413;40644;40889;40890;51365;51666;51667;51668	6731;6741;10067;13266;13268;14546;16037;17851;21738;27870;32726;38413;40644;40889;51365;51666					P46087;P46087-4;P46087-2;P46087-3;F5GWB7;F5H709;F5H5X6;F5GYR3;F5H359;F5H8G6	P46087;P46087-4;P46087-2;P46087-3
sp|Q8NBX0|SCPDL_HUMAN Saccharopine dehydrogenase-like oxidoreductase OS=Homo sapiens OX=9606 GN=SCCPDH PE=1 SV=1	Saccharopine dehydrogenase-like oxidoreductase	SCCPDH	0.103562	0.1036	-0.446313	46.6	52.7	1412200000	1517300000	70610000	75867000	1739300000	1276500000	29	43	1	17	17	17	14	14	14	14	14	14	53.4	53.4	53.4	47.151	429	429	147.64				2062	50;642;1545;3149;3150;5258;5582;5631;5693;9360;9569;10557;11631;11966;12968;12969;14239	True;True;True;True;True;True;True;True;True;True;True;True;True;True;True;True;True	52;668;1608;3279;3280;5474;5811;5863;5928;9772;9987;11091;11092;12261;12615;13670;13671;15024	148;149;150;151;1891;1892;1893;1894;1895;4571;4572;4573;4574;4575;4576;4577;9379;9380;9381;9382;9383;9384;9385;15834;16777;16778;16779;16948;16949;16950;17164;17165;28580;29194;29195;32331;32332;32333;32334;32335;35931;35932;35933;35934;35935;35936;35937;35938;35939;35940;35941;36956;36957;36958;40050;40051;40052;40053;40054;40055;40056;40057;44089;44090;44091;44092	151;152;153;154;155;1985;1986;1987;1988;1989;4903;4904;4905;4906;4907;4908;4909;4910;4911;4912;10007;10008;10009;10010;10011;10012;10013;16936;17933;17934;17935;18113;18114;18115;18116;18117;18357;18358;30847;31469;31470;34831;34832;34833;34834;34835;38693;38694;38695;38696;38697;38698;38699;38700;38701;38702;38703;39810;39811;39812;43088;43089;43090;43091;43092;43093;43094;43095;47337;47338;4733…	154;1989;4908;10010;10013;16936;17934;18117;18358;30847;31470;34835;38699;39812;43091;43095;47340		797		170	Q8NBX0	Q8NBX0
tr|H0YM60|H0YM60_HUMAN H/ACA ribonucleoprotein complex subunit 3 OS=Homo sapiens OX=9606 GN=NOP10 PE=1 SV=1;sp|Q9NPE3|NOP10_HUMAN H/ACA ribonucleoprotein complex subunit 3 OS=Homo sapiens OX=9606 GN=NOP10 PE=1 SV=1	H/ACA ribonucleoprotein complex subunit 3	NOP10	#NUM!	#NUM!	#NUM!	0	36.1	0	1081400000	0	540700000	0	1275900000	0	1	2	1	1	1	0	1	0	1	0	1	36.1	36.1	36.1	4.2337	36	36;64	-2	+			778	10329	TRUE	10811	31484	33924	33924		270		1	H0YM60;Q9NPE3	H0YM60;Q9NPE3
sp|P32242|OTX1_HUMAN Homeobox protein OTX1 OS=Homo sapiens OX=9606 GN=OTX1 PE=1 SV=1;tr|G3V3J3|G3V3J3_HUMAN Homeobox protein OTX2 (Fragment) OS=Homo sapiens OX=9606 GN=OTX2 PE=1 SV=1;tr|G3V3P9|G3V3P9_HUMAN Homeobox protein OTX2 (Fragment) OS=Homo sapiens O	Homeobox protein OTX1;Homeobox protein OTX2	OTX1;OTX2	0.337166	0.337218	-0.0438065	18.1	18.1	1147100000	1449100000	163870000	207020000	1304000000	1265000000	18	25	5	6	6	4	6	5	6	5	4	4	18.1	18.1	16.1	37.327	354	354;163;238;289;297	21.57				1353	2776;6658;12273;14045;15463;15464	True;True;True;True;True;True	2885;6936;12935;12936;14821;16298;16299	8122;8123;20153;20154;20155;20156;20157;20158;37857;37858;37859;37860;37861;37862;43471;43472;43473;43474;43475;43476;43477;48196;48197;48198;48199;48200;48201;48202;48203;48204;48205;48206;48207;48208;48209;48210;48211;48212;48213	8667;8668;21528;21529;21530;21531;21532;21533;21534;21535;40743;40744;40745;40746;40747;40748;40749;46696;46697;46698;46699;46700;46701;46702;46703;51872;51873;51874;51875;51876;51877;51878;51879;51880;51881;51882;51883;51884;51885;51886;51887;51888;51889	8668;21529;40749;46700;51879;51886		493		22	P32242;G3V3J3;G3V3P9;P32243;P32243-2	P32242;G3V3J3;G3V3P9;P32243;P32243-2
sp|P23497-4|SP100_HUMAN Isoform Sp100-C of Nuclear autoantigen Sp-100 OS=Homo sapiens OX=9606 GN=SP100;sp|P23497-5|SP100_HUMAN Isoform SpAlt-C of Nuclear autoantigen Sp-100 OS=Homo sapiens OX=9606 GN=SP100;sp|P23497-2|SP100_HUMAN Isoform Sp100-A of Nuclear	Nuclear autoantigen Sp-100	SP100	4.97785	4.97782	4.08624	3.2	13.7	41885000	1319900000	910550	28693000	74410000	1263900000	4	33	10	14	14	10	2	14	2	14	1	10	13.7	13.7	10.4	101.57	885	885;472;480;688;879;192;455;445;452;259	295.38				1304	634;4730;8577;9157;9324;10334;10335;11129;11130;11287;13400;14775;14776;17143	True;True;True;True;True;True;True;True;True;True;True;True;True;True	660;4931;8950;9549;9733;10818;10819;10820;11737;11738;11902;14138;15582;15583;18046	1879;14193;14194;14195;14196;14197;26176;27952;27953;27954;28462;31507;31508;31509;31510;31511;31512;34355;34356;34357;34838;34839;41429;41430;41431;41432;45997;45998;45999;46000;53514;53515;53516;53517;53518	1973;15159;15160;15161;15162;15163;28255;30130;30131;30132;30665;33951;33952;33953;33954;33955;33956;37022;37023;37024;37534;37535;44533;44534;44535;44536;49496;49497;49498;49499;49500;49501;57577;57578;57579;57580;57581	1973;15159;28255;30130;30665;33952;33956;37023;37024;37534;44535;49500;49501;57579		475		37	P23497-4;P23497-5;P23497-2;P23497-3;P23497;C9JBL0;E9PHV6;P23497-7;P23497-6;H0Y4R8	P23497-4;P23497-5;P23497-2;P23497-3;P23497;C9JBL0;E9PHV6;P23497-7;P23497-6
tr|B4E1G1|B4E1G1_HUMAN Derlin OS=Homo sapiens OX=9606 GN=DERL1 PE=1 SV=1;sp|Q9BUN8-2|DERL1_HUMAN Isoform 2 of Derlin-1 OS=Homo sapiens OX=9606 GN=DERL1;sp|Q9BUN8|DERL1_HUMAN Derlin-1 OS=Homo sapiens OX=9606 GN=DERL1 PE=1 SV=1;tr|E5RGY0|E5RGY0_HUMAN Derlin	Derlin-1	DERL1	3.01807	3.01808	2.0564	16.6	36.4	178760000	1448100000	19862000	160900000	303020000	1260400000	6	23	4	6	6	6	2	6	2	6	2	6	36.4	36.4	36.4	17.033	151	151;231;251;151	34.631				389	4913;10940;12612;13056;13544;17990	True;True;True;True;True;True	5117;11537;13297;13761;13762;14288;18926	14757;14758;14759;14760;14761;14762;33703;33704;33705;33706;33707;33708;38904;38905;40301;40302;40303;40304;40305;40306;41870;41871;56026;56027;56028;56029;56030;56031	15770;15771;15772;15773;15774;15775;15776;36322;36323;36324;36325;36326;36327;41858;41859;43344;43345;43346;43347;43348;43349;45021;45022;60208;60209;60210;60211;60212;60213	15770;36325;41859;43347;45021;60211					B4E1G1;Q9BUN8-2;Q9BUN8;E5RGY0	B4E1G1;Q9BUN8-2;Q9BUN8;E5RGY0
sp|Q8IY81|SPB1_HUMAN pre-rRNA 2-O-ribose RNA methyltransferase FTSJ3 OS=Homo sapiens OX=9606 GN=FTSJ3 PE=1 SV=2	pre-rRNA processing protein FTSJ3	FTSJ3	#NUM!	#NUM!	#NUM!	0	33.4	0	1273100000	0	37444000	0	1243700000	0	46	1	19	19	19	0	19	0	19	0	19	33.4	33.4	33.4	96.557	847	847	172.69				2006	125;349;1295;1418;1681;2179;3723;4932;5389;6456;6457;7406;9778;10205;13040;15534;15710;17368;17936	True;True;True;True;True;True;True;True;True;True;True;True;True;True;True;True;True;True;True	129;368;1353;1478;1747;2263;3884;5136;5611;6724;6725;7725;10200;10650;13745;16373;16566;18281;18871	360;361;1116;1117;1118;3845;4189;4190;4191;4192;4985;4986;4987;6409;11130;14809;16233;16234;16235;19500;19501;19502;19503;19504;19505;19506;19507;19508;22509;29837;29838;29839;31022;31023;31024;40262;40263;48446;48447;48448;49140;54238;55875;55876;55877	371;372;1196;1197;1198;4152;4503;4504;4505;4506;5344;5345;5346;6825;11881;15825;17362;17363;17364;20826;20827;20828;20829;20830;20831;20832;20833;20834;24199;32173;32174;32175;32176;33401;33402;33403;43305;43306;52132;52133;52134;52897;58349;60057;60058;60059	371;1196;4152;4505;5345;6825;11881;15825;17364;20829;20834;24199;32173;33401;43306;52132;52897;58349;60059					Q8IY81	Q8IY81
sp|P54709|AT1B3_HUMAN Sodium/potassium-transporting ATPase subunit beta-3 OS=Homo sapiens OX=9606 GN=ATP1B3 PE=1 SV=1	Sodium/potassium-transporting ATPase subunit beta-3	ATP1B3	1.81225	1.81225	0.615497	31.2	34.1	461660000	1621300000	38472000	135110000	810790000	1242200000	11	40	8	10	10	10	6	9	6	9	6	9	40.9	40.9	40.9	31.512	279	279;133;193;119;43;44;27;89	59.929				1476	2343;6314;8264;10892;13083;13781;14009;17530;17531;17864	True;True;True;True;True;True;True;True;True;True	2436;2437;6574;8617;11489;13792;14538;14779;18443;18444;18797	6885;6886;6887;6888;6889;6890;6891;18997;18998;18999;19000;25157;25158;25159;33568;33569;40401;40402;40403;40404;40405;40406;40407;40408;40409;40410;42613;42614;42615;42616;43325;43326;43327;43328;43329;43330;54698;54699;54700;54701;54702;55683;55684	7315;7316;7317;7318;7319;7320;7321;7322;7323;7324;7325;20282;20283;20284;20285;20286;20287;27138;27139;27140;36182;36183;43445;43446;43447;43448;43449;43450;43451;43452;43453;43454;45795;45796;45797;45798;46546;46547;46548;46549;46550;46551;58828;58829;58830;58831;58832;59856;59857;59858;59859	7325;20287;27140;36182;43454;45797;46547;58828;58830;59859		566		82	P54709;C9JA36;P54709-2;C9JXZ1;H7C547;F8WBY4;H7C4L9;C9J6S2	P54709
sp|Q6DD88|ATLA3_HUMAN Atlastin-3 OS=Homo sapiens OX=9606 GN=ATL3 PE=1 SV=1	Atlastin-3	ATL3	0.635019	0.63499	0.0784026	41	46.4	946130000	1469300000	36390000	56511000	1176400000	1242100000	32	66	2	23	23	1	14	18	14	18	1	1	58.2	58.2	3.9	60.541	541	541;169	297.31				1872	904;1896;2152;2341;2547;2924;3119;3431;4560;4894;4895;5133;7134;7561;7738;7921;8676;9513;10351;11590;12053;13893;17766	True;True;True;True;True;True;True;True;True;True;True;True;True;True;True;True;True;True;True;True;True;True;True	937;1973;2235;2434;2649;3041;3248;3582;4752;5098;5099;5342;7423;7888;8070;8257;9057;9931;10839;12218;12702;14658;14659;18689	2696;2697;2698;2699;2700;5594;5595;5596;6338;6339;6340;6877;6878;6879;6880;6881;7490;7491;7492;7493;7494;8579;8580;8581;8582;8583;9296;9297;9298;9299;9300;9301;10325;10326;10327;10328;10329;10330;13626;13627;13628;13629;13630;13631;13632;14700;14701;14702;14703;14704;14705;14706;14707;14708;15455;15456;15457;15458;15459;21580;21581;21582;21583;23063;23629;23630;24215;26465;29028;29029;31557;31558…	2928;2929;2930;2931;2932;5981;5982;5983;6754;6755;6756;7307;7308;7309;7310;7311;7975;7976;7977;7978;7979;9175;9176;9177;9178;9179;9922;9923;9924;9925;9926;9927;9928;11015;11016;11017;11018;11019;11020;14521;14522;14523;14524;14525;14526;14527;15707;15708;15709;15710;15711;15712;15713;15714;15715;15716;15717;15718;15719;16521;16522;16523;16524;16525;23186;23187;23188;23189;23190;23191;23192;24919;…	2931;5981;6755;7307;7978;9176;9926;11019;14527;15709;15719;16525;23191;24919;25537;26158;28551;31304;34003;38511;40074;46189;59538		227		343	Q6DD88;F5GWF8	Q6DD88
sp|O75928|PIAS2_HUMAN E3 SUMO-protein ligase PIAS2 OS=Homo sapiens OX=9606 GN=PIAS2 PE=1 SV=3;sp|O75928-2|PIAS2_HUMAN Isoform PIAS2-alpha of E3 SUMO-protein ligase PIAS2 OS=Homo sapiens OX=9606 GN=PIAS2;tr|A0A087WUY7|A0A087WUY7_HUMAN E3 SUMO-protein ligase	E3 SUMO-protein ligase PIAS2	PIAS2	2.90261	2.90255	2.24322	12.2	27.2	176510000	1319900000	5883800	43996000	260110000	1231500000	7	41	8	17	15	14	6	16	4	14	3	13	31.1	28.3	26.2	68.24	621	621;572;536;405;182;282;88;122	66.045				1087	231;1952;1953;2568;3049;3862;8284;9708;9746;11232;11325;11675;12192;12786;13218;15123;16853	True;True;True;True;False;True;True;True;False;True;True;True;True;True;True;True;True	243;2032;2033;2671;3177;4029;8637;10129;10167;11844;11946;12308;12848;12849;13480;13948;15940;17745	721;722;5772;5773;5774;7564;9082;9083;9084;9085;9086;9087;9088;11570;11571;11572;11573;11574;11575;25215;29633;29634;29635;29729;29730;29731;29732;29733;29734;29735;29736;34671;34971;36114;36115;37605;37606;37607;37608;37609;37610;39449;39450;39451;40933;40934;47101;47102;47103;52583;52584;52585;52586;52587;52588;52589	770;771;6162;6163;6164;8053;9703;9704;9705;9706;9707;9708;9709;12350;12351;12352;12353;12354;12355;12356;12357;27196;31954;31955;31956;32062;32063;32064;32065;32066;32067;32068;32069;37351;37669;38889;38890;40483;40484;40485;40486;40487;40488;40489;42426;42427;42428;42429;44005;44006;50708;50709;50710;56572;56573;56574;56575;56576;56577;56578;56579;56580;56581	770;6162;6164;8053;9705;12350;27196;31955;32067;37351;37669;38890;40486;42428;44006;50708;56576		364		303	O75928;O75928-2;A0A087WUY7;O75928-3;A0A0A0MS92;B4DGW0;K7ER97;K7EJT4	O75928;O75928-2;A0A087WUY7;O75928-3
sp|Q9H0U4|RAB1B_HUMAN Ras-related protein Rab-1B OS=Homo sapiens OX=9606 GN=RAB1B PE=1 SV=1;tr|E9PLD0|E9PLD0_HUMAN Ras-related protein Rab-1B OS=Homo sapiens OX=9606 GN=RAB1B PE=1 SV=1;sp|Q92928|RAB1C_HUMAN Putative Ras-related protein Rab-1C OS=Homo sapie	Ras-related protein Rab-1B;Putative Ras-related protein Rab-1C	RAB1B;RAB1C	2.73401	2.73405	1.89636	38.8	60.7	219510000	1460400000	14634000	97363000	330080000	1228800000	9	43	3	13	13	7	5	12	5	12	3	6	71.1	71.1	44.3	22.171	201	201;169;201	231.58				2361	2782;3704;4585;7776;8971;10363;10568;10853;10854;12486;12487;15011;17057	True;True;True;True;True;True;True;True;True;True;True;True;True	2892;3864;4779;8110;9359;10852;10853;11106;11447;11448;13164;13165;15821;17957	8145;8146;8147;11087;11088;11089;11090;11091;13704;13705;23765;23766;23767;23768;27333;27334;27335;27336;27337;27338;31588;31589;31590;31591;32363;32364;32365;32366;33440;33441;33442;33443;33444;33445;33446;33447;38516;38517;38518;38519;38520;38521;38522;38523;46691;46692;53248	8690;8691;8692;8693;8694;8695;11837;11838;11839;11840;11841;11842;14607;14608;25684;25685;25686;25687;29472;29473;29474;29475;29476;29477;34034;34035;34036;34037;34038;34863;34864;34865;34866;36046;36047;36048;36049;36050;36051;36052;36053;41450;41451;41452;41453;41454;41455;41456;41457;50263;50264;57295	8691;11841;14607;25684;29476;34035;34866;36051;36052;41450;41456;50263;57295		869		173	Q9H0U4;E9PLD0;Q92928	Q9H0U4;E9PLD0;Q92928
sp|P52292|IMA1_HUMAN Importin subunit alpha-1 OS=Homo sapiens OX=9606 GN=KPNA2 PE=1 SV=1;tr|J3QLL0|J3QLL0_HUMAN Importin subunit alpha-1 (Fragment) OS=Homo sapiens OX=9606 GN=KPNA2 PE=1 SV=1;tr|J3KS65|J3KS65_HUMAN Importin subunit alpha-1 (Fragment) OS=Hom	Importin subunit alpha-1	KPNA2	7.42912	7.42916	#NUM!	3.4	23.6	7334300	1264000000	366710	63201000	0	1218500000	1	46	4	10	10	10	1	10	1	10	1	10	23.6	23.6	23.6	57.861	529	529;134;143;50	174.82				1454	3064;4470;4984;6079;8919;11116;11357;11633;12642;14317	True;True;True;True;True;True;True;True;True;True	3192;4660;5190;6331;9307;11722;11978;12263;13328;15105	9130;9131;9132;9133;9134;9135;13373;13374;14975;14976;14977;14978;14979;18340;27199;27200;27201;27202;27203;27204;34300;34301;34302;35076;35077;35078;35944;35945;35946;39004;44371;44372;44373	9752;9753;9754;9755;9756;9757;9758;9759;14260;14261;15998;15999;16000;16001;16002;19592;29330;29331;29332;29333;29334;29335;29336;29337;29338;36953;36954;36955;36956;36957;36958;36959;36960;37782;37783;37784;37785;38706;38707;38708;38709;38710;38711;41969;47659;47660;47661	9752;14260;15999;19592;29331;36957;37784;38711;41969;47661					P52292;J3QLL0;J3KS65;J3QL07	P52292;J3QLL0;J3KS65
tr|E7EQB8|E7EQB8_HUMAN Isocitrate dehydrogenase [NAD] subunit, mitochondrial OS=Homo sapiens OX=9606 GN=IDH3G PE=1 SV=1;sp|P51553-2|IDH3G_HUMAN Isoform 2 of Isocitrate dehydrogenase [NAD] subunit gamma, mitochondrial OS=Homo sapiens OX=9606 GN=IDH3G;sp|P51	Isocitrate dehydrogenase [NAD] subunit, mitochondrial;Isocitrate dehydrogenase [NAD] subunit gamma, mitochondrial	IDH3G	#NUM!	#NUM!	#NUM!	0	2.9	0	1134700000	0	66750000	0	1215300000	0	3	3	1	1	1	0	1	0	1	0	1	2.9	2.9	2.9	37.066	340	340;380;393	1.8376				559	15904	TRUE	16764	49753;49754	53574;53575;53576	53575					E7EQB8;P51553-2;P51553	E7EQB8;P51553-2;P51553
tr|B0QYD3|B0QYD3_HUMAN DNA dC->dU-editing enzyme APOBEC-3B OS=Homo sapiens OX=9606 GN=APOBEC3B PE=1 SV=1;sp|Q9UH17|ABC3B_HUMAN DNA dC->dU-editing enzyme APOBEC-3B OS=Homo sapiens OX=9606 GN=APOBEC3B PE=1 SV=1;sp|Q9UH17-3|ABC3B_HUMAN Isoform 3 of DNA dC->dU	DNA dC->dU-editing enzyme APOBEC-3B	APOBEC3B	1.53802	1.53801	0.22509	25.3	23.7	637820000	1852200000	26576000	77175000	1038200000	1213500000	20	45	8	13	13	13	8	12	8	12	8	12	27.8	27.8	27.8	57.208	490	490;382;357;251;187;199;202;386	191.41				354	497;2446;2654;3793;4060;5361;6800;7108;7109;7849;10795;13920;17725	True;True;True;True;True;True;True;True;True;True;True;True;True	522;2545;2760;2761;3958;4235;5581;7081;7395;7396;7397;8184;11382;11383;14690;18646	1502;1503;1504;1505;1506;1507;1508;1509;1510;7205;7206;7207;7208;7801;7802;7803;7804;7805;7806;11378;11379;11380;11381;12189;12190;12191;12192;12193;12194;12195;16151;16152;16153;20597;20598;21493;21494;21495;21496;21497;21498;21499;21500;24003;24004;24005;24006;33240;33241;33242;33243;33244;33245;33246;33247;33248;33249;33250;43101;43102;43103;43104;55270;55271;55272	1584;1585;1586;1587;1588;1589;1590;1591;1592;7673;7674;7675;7676;8316;8317;8318;8319;8320;8321;12148;12149;12150;12151;13001;13002;13003;13004;13005;13006;13007;17276;17277;17278;22147;22148;23098;23099;23100;23101;23102;23103;23104;23105;25932;25933;25934;25935;35831;35832;35833;35834;35835;35836;35837;35838;35839;35840;35841;46306;46307;46308;46309;59417;59418;59419	1592;7673;8318;12150;13005;17277;22148;23098;23101;25933;35840;46307;59417		139;140;141		12;193;325	B0QYD3;Q9UH17;Q9UH17-3;Q9UH17-2;P31941-2;P31941;Q6ICH2;Q96AK3	B0QYD3;Q9UH17;Q9UH17-3
tr|J3KT10|J3KT10_HUMAN Nuclear pore complex protein Nup85 OS=Homo sapiens OX=9606 GN=NUP85 PE=1 SV=1;sp|Q9BW27|NUP85_HUMAN Nuclear pore complex protein Nup85 OS=Homo sapiens OX=9606 GN=NUP85 PE=1 SV=1;sp|Q9BW27-3|NUP85_HUMAN Isoform 3 of Nuclear pore compl	Nuclear pore complex protein Nup85	NUP85	1.54357	1.54357	0.512179	23.9	27.2	527280000	1537100000	18831000	54895000	850510000	1213000000	28	53	14	17	17	17	13	16	13	16	13	16	30	30	30	70.177	611	611;656;610;544;259;302;462;169;120;272;114;46;98;191	323.31				880	832;1828;2493;2494;3701;5979;6702;7225;7482;8281;8451;10240;12440;12816;13330;16902;17738	True;True;True;True;True;True;True;True;True;True;True;True;True;True;True;True;True	861;1902;2594;2595;3861;6227;6980;7532;7804;8634;8812;10694;13114;13115;13511;13512;14063;17799;18660	2412;2413;2414;2415;2416;2417;2418;2419;5401;5402;5403;5404;5405;5406;7323;7324;7325;7326;7327;7328;7329;11077;11078;11079;11080;11081;11082;11083;18051;18052;18053;20270;21989;21990;21991;21992;22739;22740;22741;22742;22743;22744;22745;25205;25206;25207;25208;25209;25210;25211;25723;25724;25725;25726;25727;25728;31132;31133;31134;38381;38382;38383;39547;39548;39549;39550;39551;39552;39553;39554;…	2524;2525;2526;2527;2528;2529;2530;2531;5775;5776;5777;5778;5779;5780;7791;7792;7793;7794;7795;7796;7797;11827;11828;11829;11830;11831;11832;11833;19266;19267;19268;21654;23631;23632;23633;23634;24432;24433;24434;24435;24436;24437;24438;27186;27187;27188;27189;27190;27191;27192;27789;27790;27791;27792;27793;27794;33516;33517;33518;33519;33520;41308;41309;41310;42537;42538;42539;42540;42541;42542;…	2526;5779;7794;7797;11833;19268;21654;23631;24434;27190;27792;33517;41309;42540;44293;56767;59453		289;290;291		530;556;589	J3KT10;Q9BW27;Q9BW27-3;J3QL54;F5H0W7;J3QLH0;Q9BW27-2;J3KRC0;J3KSH3;J3QLD4;J3QL91;J3QS63;J3KS87;J3QLV0	J3KT10;Q9BW27;Q9BW27-3;J3QL54;F5H0W7;J3QLH0
sp|Q13523|PRP4B_HUMAN Serine/threonine-protein kinase PRP4 homolog OS=Homo sapiens OX=9606 GN=PRPF4B PE=1 SV=3;tr|H0YDJ3|H0YDJ3_HUMAN Serine/threonine-protein kinase PRP4 homolog (Fragment) OS=Homo sapiens OX=9606 GN=PRPF4B PE=1 SV=1	Serine/threonine-protein kinase PRP4 homolog	PRPF4B	2.85438	2.85439	2.64066	5.4	18.5	171600000	1241000000	4185300	30268000	193660000	1207700000	12	59	2	22	22	22	6	21	6	21	6	21	18.5	18.5	18.5	116.99	1007	1007;587	159.86				1674	30;82;361;997;1944;2312;3311;3658;4533;6872;6873;7499;8009;8010;14524;14856;14857;15063;15064;15784;16692;17821	True;True;True;True;True;True;True;True;True;True;True;True;True;True;True;True;True;True;True;True;True;True	32;84;380;381;1033;2024;2403;3454;3817;4724;7156;7157;7824;8352;8353;15318;15665;15666;15873;15874;16642;17578;18751	80;81;82;222;223;1146;1147;1148;2964;2965;5760;6795;6796;9920;9921;10976;13528;13529;13530;13531;20799;20800;20801;20802;20803;20804;20805;20806;22809;22810;24490;24491;24492;24493;24494;24495;24496;45240;46190;46191;46192;46193;46194;46195;46196;46814;46815;46816;46817;46818;46819;46820;46821;46822;46823;46824;46825;46826;46827;46828;49343;49344;52098;52099;52100;52101;52102;52103;55566;55567	82;83;84;228;229;1226;1227;1228;3207;3208;6150;7221;7222;10588;10589;11724;14420;14421;14422;14423;22356;22357;22358;22359;22360;22361;22362;22363;22364;24513;24514;26443;26444;26445;26446;26447;26448;26449;48710;49698;49699;49700;49701;49702;49703;49704;50388;50389;50390;50391;50392;50393;50394;50395;50396;50397;50398;50399;50400;50401;50402;53121;53122;56068;56069;56070;56071;56072;56073;59727;…	83;228;1226;3207;6150;7221;10588;11724;14423;22357;22362;24514;26444;26448;48710;49701;49702;50394;50398;53121;56071;59728		661		125	Q13523;H0YDJ3	Q13523;H0YDJ3
tr|A0A2U3TZM0|A0A2U3TZM0_HUMAN Chromodomain-helicase-DNA-binding protein 4 OS=Homo sapiens OX=9606 GN=CHD4 PE=1 SV=1;sp|Q14839-2|CHD4_HUMAN Isoform 2 of Chromodomain-helicase-DNA-binding protein 4 OS=Homo sapiens OX=9606 GN=CHD4;tr|A0A2R8YFK9|A0A2R8YFK9_HU	Chromodomain-helicase-DNA-binding protein 4	CHD4	5.50016	5.50021	#NUM!	2.5	25.2	27711000	1254200000	307900	13936000	0	1203800000	3	73	33	38	38	38	3	36	3	36	3	36	27	27	27	216.88	1902	1902;1940;1899;1912;1937;1920;1892;1889;1914;1905;1903;1554;1484;1669;1645;1671;1215;1262;1425;1377;1147;605;560;554;458;1954;1060;2059;354;1966;2000;1225;103	263.28				166	204;493;547;773;1818;3290;3409;3717;3947;4190;4378;4548;4841;4842;5229;5716;5989;6229;7474;7929;8839;10458;10537;10590;10875;10924;12079;12080;14145;14700;15690;15888;16026;16162;17364;17366;17431;17575	True;True;True;True;True;True;True;True;True;True;True;True;True;True;True;True;True;True;True;True;True;True;True;True;True;True;True;True;True;True;True;True;True;True;True;True;True;True	210;518;572;801;1892;3433;3560;3877;4119;4367;4565;4740;5043;5044;5445;5954;6238;6488;7796;8266;9224;10971;11070;11133;11471;11521;12731;12732;14927;15503;16540;16748;16894;17031;18277;18279;18344;18493	579;1494;1495;1642;1643;1644;2248;2249;5378;5379;9860;9861;9862;10262;10263;11110;11871;12598;13151;13152;13153;13154;13155;13587;13588;13589;14532;14533;14534;14535;14536;14537;15740;15741;17256;18094;18095;18754;18755;18756;22720;24241;24242;26965;26966;26967;31998;31999;32283;32468;32469;33515;33647;37313;37314;43817;43818;43819;45758;45759;48970;48971;48972;49693;49694;49695;50168;50529;50530…	617;1576;1577;1727;1728;1729;2358;2359;5752;5753;10528;10529;10530;10952;10953;11861;12673;13431;14031;14032;14033;14034;14035;14482;14483;14484;15517;15518;15519;15520;15521;15522;16835;16836;18450;19309;19310;20031;20032;20033;24413;26185;26186;29089;29090;29091;34478;34479;34783;34978;34979;36124;36265;40187;40188;47058;47059;47060;49250;49251;52697;52698;52699;53512;53513;53514;54025;54395;54…	617;1576;1727;2358;5752;10528;10953;11861;12673;13431;14034;14482;15519;15522;16836;18450;19309;20033;24413;26185;29089;34479;34783;34979;36124;36265;40187;40188;47060;49251;52698;53512;54025;54397;58337;58341;58532;58962		39		1686	A0A2U3TZM0;Q14839-2;A0A2R8YFK9;Q14839;A0A0C4DGG9;A0A2R8Y521;A0A2R8Y5J0;A0A2R8Y425;A0A2R8Y212;F5GWX5;A0A2R8YFD8;A0A2R8YDJ9;A0A2R8YD40;A0A2R8Y8C1;A0A2R8YER1;A0A2R8Y445;A0A2R8YDW2;A0A2R8Y4X2;A0A2R8Y5Z7;A0A2R8Y685;A0A2R8Y8B3;A0A2R8Y7I0;A0A2R8Y7M9;A0A2R8Y5M9;A0A2R8YE38;Q8TDI0;K7EMY3;Q12873-3;F5H6N4;Q12873-2;Q12873;F2Z2R5;A0A2R8Y6G9	A0A2U3TZM0;Q14839-2;A0A2R8YFK9;Q14839;A0A0C4DGG9;A0A2R8Y521;A0A2R8Y5J0;A0A2R8Y425;A0A2R8Y212;F5GWX5;A0A2R8YFD8;A0A2R8YDJ9;A0A2R8YD40;A0A2R8Y8C1;A0A2R8YER1;A0A2R8Y445;A0A2R8YDW2;A0A2R8Y4X2;A0A2R8Y5Z7;A0A2R8Y685;A0A2R8Y8B3
sp|P60468|SC61B_HUMAN Protein transport protein Sec61 subunit beta OS=Homo sapiens OX=9606 GN=SEC61B PE=1 SV=2	Protein transport protein Sec61 subunit beta	SEC61B	0.193349	0.193349	-0.196891	37.5	37.5	1152600000	1317900000	192100000	219650000	1371000000	1196100000	9	12	2	3	3	3	3	3	3	3	3	3	37.5	37.5	37.5	9.9743	96	96;42	19.46				1506	4538;11703;15589	True;True;True	4729;12339;16433;16434	13542;13543;13544;13545;13546;13547;36215;36216;36217;36218;36219;36220;48641;48642;48643;48644;48645;48646	14435;14436;14437;14438;14439;14440;14441;39006;39007;39008;39009;39010;39011;39012;39013;52342;52343;52344;52345;52346;52347	14438;39007;52346		583		55	P60468;S4R3B5	P60468
sp|Q969F2|NKD2_HUMAN Protein naked cuticle homolog 2 OS=Homo sapiens OX=9606 GN=NKD2 PE=1 SV=1;sp|Q969F2-2|NKD2_HUMAN Isoform 2 of Protein naked cuticle homolog 2 OS=Homo sapiens OX=9606 GN=NKD2	Protein naked cuticle homolog 2	NKD2	-1.00775	-1.00775	-1.53356	47.9	35.5	2724200000	1354800000	113510000	56451000	3457500000	1194300000	51	43	2	21	21	21	17	13	17	13	17	13	55.2	55.2	55.2	50.055	451	451;311	241.05				2179	578;922;2125;2224;2734;2854;2880;2922;3450;3451;3930;5396;9876;10253;11014;12671;12761;12871;14082;16376;17012	True;True;True;True;True;True;True;True;True;True;True;True;True;True;True;True;True;True;True;True;True	603;955;2208;2309;2843;2967;2994;3039;3602;3603;4101;5618;10302;10710;10711;11616;13358;13454;13570;14861;17253;17911	1714;1715;2744;2745;6273;6535;8015;8016;8322;8399;8400;8401;8402;8403;8561;8562;8563;8564;8565;8566;8567;8568;8569;8570;8571;10395;10396;10397;10398;10399;10400;11793;11794;11795;16248;30117;30118;30119;31184;31185;31186;31187;31188;33956;33957;33958;33959;33960;33961;33962;33963;33964;33965;33966;39089;39090;39091;39358;39359;39360;39361;39362;39363;39364;39365;39366;39367;39368;39734;39735;4358…	1800;1801;2976;2977;6689;6951;8536;8537;8873;8981;8982;8983;8984;8985;8986;9157;9158;9159;9160;9161;9162;9163;9164;9165;9166;9167;11087;11088;11089;11090;11091;11092;12581;12582;12583;17377;32467;32468;32469;33570;33571;33572;33573;33574;36591;36592;36593;36594;36595;36596;36597;36598;36599;36600;36601;42057;42058;42059;42334;42335;42336;42337;42338;42339;42340;42341;42342;42343;42344;42744;42745…	1801;2976;6689;6951;8537;8873;8985;9157;11090;11091;12582;17377;32469;33571;36599;42059;42341;42745;46822;55069;57158		823		200	Q969F2;Q969F2-2	Q969F2;Q969F2-2
[truncated: 2,466 more rows]
